# Supplementary material for: The Digitaria genomes reveal local adaption and herbicide resistance mediated by introgression
Source: Research Square preprint supplement (doi:10.21203/rs.3.rs-7329239/v1), 2025-09-13
Supplement: Supplementary file 1 [file 5d24904b92b8f7cba99433a7.xlsx]

## Sheet: Table1
Supplementary Table 1. Coordinates and composition of telomeres in the assemblies.
Species	Chr	Chr length (bp)	Start (bp)	End (bp)	Length (bp)	Repeat unit	Telomeric repeat length (bp)	Telomeric repeat
D. sanguinalis	Chr01	50920637	50919308	50920637	1329	TTTAGGG	1225	0.921746
D. sanguinalis	Chr02	40381672	1	4129	4128	CCCTAAA	3822	0.925872
D. sanguinalis	Chr02	40381672	40377783	40381672	3889	TTTAGGG	3542	0.910774
D. sanguinalis	Chr03	48133076	48129624	48133076	3452	TTTAGGG	3192	0.924681
D. sanguinalis	Chr04	64774194	1	826	825	CCCTAAA	742	0.899394
D. sanguinalis	Chr04	64774194	64763273	64774194	10921	TTTAGGG	10283	0.94158
D. sanguinalis	Chr05	60592233	1	1597	1596	CCCTAAA	1379	0.864035
D. sanguinalis	Chr05	60592233	60584756	60592233	7477	TTTAGGG	6762	0.904373
D. sanguinalis	Chr06	69850184	1	6951	6950	CCCTAAA	6405	0.921583
D. sanguinalis	Chr06	69850184	69840640	69850184	9544	TTTAGGG	8631	0.904338
D. sanguinalis	Chr07	62281207	1	4570	4569	CCCTAAA	4102	0.897789
D. sanguinalis	Chr07	62281207	62278395	62281207	2812	TTTAGGG	2534	0.901138
D. sanguinalis	Chr08	54688869	1	12745	12744	CCCTAAA	11501	0.902464
D. sanguinalis	Chr08	54688869	54685207	54688869	3662	TTTAGGG	3164	0.864009
D. sanguinalis	Chr09	61383960	1	6491	6490	CCCTAAA	5908	0.910324
D. sanguinalis	Chr09	61383960	61379735	61383960	4225	TTTAGGG	3885	0.919527
D. sanguinalis	Chr10	47255708	1	2576	2575	CCCTAAA	2240	0.869903
D. sanguinalis	Chr10	47255708	47253513	47255708	2195	TTTAGGG	1890	0.861048
D. sanguinalis	Chr11	54576679	1	11667	11666	CCCTAAA	10927	0.936654
D. sanguinalis	Chr11	54576679	54569404	54576536	7132	TTTAGGG	6699	0.939288
D. sanguinalis	Chr12	55131347	49	6193	6144	CCCTAAA	5565	0.905762
D. sanguinalis	Chr12	55131347	55128489	55131347	2858	TTTAGGG	2660	0.930721
D. sanguinalis	Chr13	54295257	1	1511	1510	CCCTAAA	1407	0.931788
D. sanguinalis	Chr13	54295257	54289663	54295254	5591	TTTAGGG	5271	0.942765
D. sanguinalis	Chr14	51619479	1	2266	2265	CCCTAAA	2086	0.920971
D. sanguinalis	Chr15	60621832	1	1583	1582	CCCTAAA	1484	0.938053
D. sanguinalis	Chr15	60621832	60611523	60621832	10309	TTTAGGG	3185	0.308953
D. sanguinalis	Chr16	51839591	1	2871	2870	CCCTAAA	2667	0.929268
D. sanguinalis	Chr16	51839591	51835783	51839591	3808	TTTAGGG	3542	0.930147
D. sanguinalis	Chr17	47030449	1	3351	3350	CCCTAAA	3164	0.944478
D. sanguinalis	Chr17	47030449	47024589	47030449	5860	TTTAGGG	5390	0.919795
D. sanguinalis	Chr18	51058412	1	7197	7196	CCCTAAA	6783	0.942607
D. sanguinalis	Chr18	51058412	51056024	51058412	2388	TTTAGGG	2184	0.914573
D. sanguinalis	Chr19	44673478	1	1421	1420	CCCTAAA	1204	0.847887
D. sanguinalis	Chr19	44673478	44668548	44673478	4930	TTTAGGG	4452	0.903043
D. sanguinalis	Chr20	38605977	1	6595	6594	CCCTAAA	6188	0.938429
D. sanguinalis	Chr21	43444786	1	6699	6698	CCCTAAA	6153	0.918632
D. sanguinalis	Chr21	43444786	43437643	43444764	7121	TTTAGGG	6552	0.920095
D. sanguinalis	Chr22	38336602	1	4049	4048	CCCTAAA	3682	0.909585
D. sanguinalis	Chr22	38336602	38334163	38336602	2439	TTTAGGG	2009	0.823698
D. sanguinalis	Chr23	37650586	1	9525	9524	CCCTAAA	8701	0.913587
D. sanguinalis	Chr23	37650586	37646252	37650586	4334	TTTAGGG	3976	0.917397
D. sanguinalis	Chr24	42677637	1	6938	6937	CCCTAAA	6447	0.929364
D. sanguinalis	Chr24	42677637	42675567	42677637	2070	TTTAGGG	1645	0.794686
D. sanguinalis	Chr25	38679683	1	1496	1495	CCCTAAA	1295	0.866221
D. sanguinalis	Chr25	38679683	38676597	38679683	3086	TTTAGGG	2695	0.873299
D. sanguinalis	Chr26	34727727	1	11153	11152	CCCTAAA	10374	0.930237
D. sanguinalis	Chr26	34727727	34721795	34727727	5932	TTTAGGG	5362	0.903911
D. sanguinalis	Chr27	42502143	1	15982	15981	CCCTAAA	14791	0.925537
D. sanguinalis	Chr27	42502143	42498932	42502143	3211	TTTAGGG	2891	0.900343
D. milanjiana	Chr01	41899640	57933	62182	4250	CCCTAAA	3703	0.871294
D. milanjiana	Chr01	41899640	41896535	41899639	3105	TTTAGGG	2751	0.88599
D. milanjiana	Chr03	59784263	1	1595	1533	CCCTAAA	1316	0.858447
D. milanjiana	Chr03	59784263	59441515	59448519	7005	TTTAGGG	6349	0.906353
D. milanjiana	Chr04	50518715	1	1449	1299	CCCTAAA	1106	0.851424
D. milanjiana	Chr04	50518715	50516481	50518707	2227	TTTAGGG	1869	0.839246
D. milanjiana	Chr05	55063045	1	2511	2490	CCCTAAA	2142	0.860241
D. milanjiana	Chr05	55063045	55059358	55063023	3666	TTTAGGG	3129	0.853519
D. milanjiana	Chr06	62273015	1	2168	1903	CCCTAAA	1505	0.790857
D. milanjiana	Chr06	62273015	62271343	62272888	1546	TTTAGGG	1372	0.887451
D. milanjiana	Chr07	52225969	52221949	52225681	3733	TTTAGGG	3227	0.864452
D. milanjiana	Chr08	53212026	1	3192	3129	CCCTAAA	2618	0.836689
D. milanjiana	Chr08	53212026	53207983	53212025	4043	TTTAGGG	3437	0.850111
D. milanjiana	Chr09	54113894	54107703	54113602	5900	TTTAGGG	5012	0.849492
D. milanjiana	Chr10	62873757	62871972	62873752	1781	TTTAGGG	1575	0.884335
D. milanjiana	Chr11	46030673	1	2918	2811	CCCTAAA	2380	0.846674
D. milanjiana	Chr12	46536385	1	1991	1589	CCCTAAA	1449	0.911894
D. milanjiana	Chr13	41869489	1	9778	9629	CCCTAAA	8701	0.903624
D. milanjiana	Chr13	41869489	41864968	41869417	4450	TTTAGGG	3801	0.854157
D. milanjiana	Chr14	41366871	1	5572	5517	CCCTAAA	4872	0.883089
D. milanjiana	Chr14	41366871	41364730	41366751	2022	TTTAGGG	1715	0.84817
D. milanjiana	Chr15	36961151	1	4900	4893	CCCTAAA	4312	0.881259
D. milanjiana	Chr15	36961151	36958679	36960885	2207	TTTAGGG	1764	0.799275
D. milanjiana	Chr16	44840594	1	1654	1619	CCCTAAA	1337	0.825818
D. milanjiana	Chr16	44840594	44838584	44840381	1798	TTTAGGG	1631	0.907119
D. milanjiana	Chr17	33548115	1	3156	3096	CCCTAAA	2814	0.908915
D. milanjiana	Chr17	33548115	33547486	33547821	336	TTTAGGG	294	0.875
D. milanjiana	Chr18	42901567	1	822	790	CCCTAAA	630	0.797468
D. milanjiana	Chr18	42901567	42896979	42901564	4586	TTTAGGG	4165	0.908199
D. radicosa	Chr01	51776112	1	11407	11407	CCCTAAA	9947	0.872008
D. radicosa	Chr01	51776112	51770930	51776058	5129	TTTAGGG	4746	0.925327
D. radicosa	Chr02	66370095	1	2934	2883	CCCTAAA	2464	0.854665
D. radicosa	Chr02	66370095	66262598	66266408	3811	TTTAGGG	3451	0.905537
D. radicosa	Chr03	65149586	1	8697	8643	CCCTAAA	7735	0.894944
D. radicosa	Chr03	65149586	65099202	65105081	5880	TTTAGGG	5222	0.888095
D. radicosa	Chr04	48700489	311759	314805	3047	CCCTAAA	2765	0.90745
D. radicosa	Chr04	48700489	48693919	48700478	6560	TTTAGGG	5936	0.904878
D. radicosa	Chr05	56485452	1	9484	9484	CCCTAAA	8666	0.913749
D. radicosa	Chr05	56485452	56478557	56485404	6848	TTTAGGG	6209	0.906688
D. radicosa	Chr06	53185984	107678	110030	2353	CCCTAAA	2037	0.865703
D. radicosa	Chr06	53185984	53182299	53185916	3618	TTTAGGG	3290	0.909342
D. radicosa	Chr07	43793367	1	1132	1073	CCCTAAA	924	0.861137
D. radicosa	Chr07	43793367	43785560	43793362	7803	TTTAGGG	7203	0.923106
D. radicosa	Chr08	40452930	41599	58311	16713	CCCTAAA	10486	0.627416
D. radicosa	Chr08	40452930	40449657	40452871	3215	TTTAGGG	2947	0.916641
D. radicosa	Chr09	35142718	1	2613	2539	CCCTAAA	2086	0.821583
D. radicosa	Chr09	35142718	35140969	35142699	1731	TTTAGGG	1442	0.833044

## Sheet: Table2
Supplementary Table 2. Coordinates of 45s and 5s rDNA in the genome. All the repeat array within 100k were merged.
Species	Type	Chr	Start (bp)	End (bp)
D. sanguinalis	45S	Chr01	3145	8917
D. sanguinalis	45S	Chr01	11070	24767
D. sanguinalis	45S	Chr03	580	75365
D. sanguinalis	5S	Chr08	48339580	48339697
D. sanguinalis	5S	Chr19	18124670	18440257
D. sanguinalis	5S	Chr19	28144615	28981187
D. sanguinalis	5S	Chr20	31408083	32340454
D. sanguinalis	5S	Chr21	20880574	20881264
D. milanjiana	45S	Chr01	2886	8658
D. milanjiana	45S	Chr01	10761	768976
D. milanjiana	45S	Chr01	872476	932539
D. milanjiana	5S	Chr01	45608304	45608421
D. milanjiana	5S	Chr05	48434577	48434694
D. milanjiana	5S	Chr11	10857614	10857731
D. milanjiana	5S	Chr13	16534448	16802935
D. milanjiana	5S	Chr13	34346143	35107903
D. milanjiana	5S	Chr14	18465794	18482236
D. radicosa	45S	Chr01	119244	125016
D. radicosa	45S	Chr01	127171	303100
D. radicosa	5S	Chr07	17036543	17091395
D. radicosa	5S	Chr07	27810611	28241933

## Sheet: Table3
Supplementary Table 3. Summary of Genome Sequencing, Assembly, and Annotation Statistics for Three Digitaria Species.
Species	D. radicosa	D. milanjiana	D. sanguinalis
Ploidy	2n = 2× = 18	2n = 4× = 36	2n = 6× = 54
Estimated genome size, Gb	0.46	0.92	1.35
Sequencing platform and coverage	Pacbio (80×) + Illumina (99×)	Pacbio (56×) + Illumina (50×)	Pacbio (81×) + ONT (88×) + Illumina (42×) + HiC (79×)
Assembly size, Gb	0.49	0.91	1.37
Contig N50, Mb	48	41	52
Scaffold N50, Mb	53	52	52
Genes annotated	37527	74348	114996
Percentage of repeat elements, %	51.89	50.88	51.83
GC content, %	45.4	45.76	45.62

## Sheet: Table4
		Supplementary Table 4. Library information for transcriptomes sequencing used in this study.
		Sample name	Organism	Accession	Stage	Tissue	Time	Treat	Rep	Paired Seq Num
		15-2_0h_1	Digitaria sanguinalis	15-2	seedling stage	Leaf	0h	Control	1	22303686
		15-2_0h_2	Digitaria sanguinalis	15-2	seedling stage	Leaf	0h	Control	2	29974549
		15-2_0h_3	Digitaria sanguinalis	15-2	seedling stage	Leaf	0h	Control	3	38743362
		15-2_Y_24h_1	Digitaria sanguinalis	15-2	seedling stage	Leaf	24h	nicosulfuron	1	26872674
		15-2_Y_24h_2	Digitaria sanguinalis	15-2	seedling stage	Leaf	24h	nicosulfuron	2	31769350
		15-2_Y_24h_3	Digitaria sanguinalis	15-2	seedling stage	Leaf	24h	nicosulfuron	3	32020535
		15-2_Y_6h_1	Digitaria sanguinalis	15-2	seedling stage	Leaf	6h	nicosulfuron	1	30984020
		15-2_Y_6h_2	Digitaria sanguinalis	15-2	seedling stage	Leaf	6h	nicosulfuron	2	30126776
		15-2_Y_6h_3	Digitaria sanguinalis	15-2	seedling stage	Leaf	6h	nicosulfuron	3	28398519
		21-17_0h_1	Digitaria sanguinalis	21-17	seedling stage	Leaf	0h	Control	1	26142810
		21-17_0h_2	Digitaria sanguinalis	21-17	seedling stage	Leaf	0h	Control	2	20049952
		21-17_0h_3	Digitaria sanguinalis	21-17	seedling stage	Leaf	0h	Control	3	27592937
		21-17_Y_24h_1	Digitaria sanguinalis	21-17	seedling stage	Leaf	24h	nicosulfuron	1	50393337
		21-17_Y_24h_2	Digitaria sanguinalis	21-17	seedling stage	Leaf	24h	nicosulfuron	2	48719688
		21-17_Y_24h_3	Digitaria sanguinalis	21-17	seedling stage	Leaf	24h	nicosulfuron	3	58806203
		21-17_Y_6h_1	Digitaria sanguinalis	21-17	seedling stage	Leaf	6h	nicosulfuron	1	35171322
		21-17_Y_6h_2	Digitaria sanguinalis	21-17	seedling stage	Leaf	6h	nicosulfuron	2	50644365
		21-17_Y_6h_3	Digitaria sanguinalis	21-17	seedling stage	Leaf	6h	nicosulfuron	3	51086259
		Oleaf-1	Digitaria sanguinalis	YJ2023	/	old leaf	/	/	1	56480086
		Oleaf-2	Digitaria sanguinalis	YJ2023	/	old leaf	/	/	2	52367078
		Oleaf-3	Digitaria sanguinalis	YJ2023	/	old leaf	/	/	3	47186730
		Root-1	Digitaria sanguinalis	YJ2023	/	root	/	/	1	47178804
		Root-2	Digitaria sanguinalis	YJ2023	/	root	/	/	2	40949098
		Root-3	Digitaria sanguinalis	YJ2023	/	root	/	/	3	38573386
		Stem-1	Digitaria sanguinalis	YJ2023	/	stem	/	/	1	50001646
		Stem-2	Digitaria sanguinalis	YJ2023	/	stem	/	/	2	47103032
		Stem-3	Digitaria sanguinalis	YJ2023	/	stem	/	/	3	41031464
		Tleaf-1	Digitaria sanguinalis	YJ2023	/	fresh leaf	/	/	1	44039716
		Tleaf-2	Digitaria sanguinalis	YJ2023	/	fresh leaf	/	/	2	48340252
		Tleaf-3	Digitaria sanguinalis	YJ2023	/	fresh leaf	/	/	3	48865766
		Drad-S-1	Digitaria radicosa	YZGJ2	/	stem	/	/	1	52134486
		Drad-S-2	Digitaria radicosa	YZGJ2	/	stem	/	/	2	40295002
		Drad-S-3	Digitaria radicosa	YZGJ2	/	stem	/	/	3	52735194
		Drad-F-1	Digitaria radicosa	YZGJ2	/	flower	/	/	1	62249944
		Drad-F-2	Digitaria radicosa	YZGJ2	/	flower	/	/	2	39440068
		Drad-F-3	Digitaria radicosa	YZGJ2	/	flower	/	/	3	40651890
		Drad-R-1	Digitaria radicosa	YZGJ2	/	root	/	/	1	41981298
		Drad-R-2	Digitaria radicosa	YZGJ2	/	root	/	/	2	42150250
		Drad-R-3	Digitaria radicosa	YZGJ2	/	root	/	/	3	39409744
		Drad-L-1	Digitaria radicosa	YZGJ2	/	leaf	/	/	1	42053776
		Drad-L-2	Digitaria radicosa	YZGJ2	/	leaf	/	/	2	40676904
		Drad-L-3	Digitaria radicosa	YZGJ2	/	leaf	/	/	3	47934408
		Dmil-S-1	Digitaria milanjiana	DZ2	/	stem	/	/	1	55452886
		Dmil-S-2	Digitaria milanjiana	DZ2	/	stem	/	/	2	53266822
		Dmil-S-3	Digitaria milanjiana	DZ2	/	stem	/	/	3	46433238
		Dmil-F-1	Digitaria milanjiana	DZ2	/	flower	/	/	1	54963318
		Dmil-F-2	Digitaria milanjiana	DZ2	/	flower	/	/	2	42273674
		Dmil-F-3	Digitaria milanjiana	DZ2	/	flower	/	/	3	51792650
		Dmil-R-1	Digitaria milanjiana	DZ2	/	root	/	/	1	59948394
		Dmil-R-2	Digitaria milanjiana	DZ2	/	root	/	/	2	47693388
		Dmil-R-3	Digitaria milanjiana	DZ2	/	root	/	/	3	49310848
		Dmil-L-1	Digitaria milanjiana	DZ2	/	leaf	/	/	1	52037606
		Dmil-L-2	Digitaria milanjiana	DZ2	/	leaf	/	/	2	58631046
		Dmil-L-3	Digitaria milanjiana	DZ2	/	leaf	/	/	3	51435340

## Sheet: Table5
Supplementary Table 5. Summary of assembly and annotation quality for genomes of three Digitaria species.
Species	D. radicosa	D. milanjiana	D. sanguinalis
Ploidy	2n = 2× = 18	2n = 4× = 36	2n = 6× = 54
NGS mapping rate, %	99.51	99.48	99.58
TGS mapping rate, %	100	100	99.97
Assembled Telomere count	18	29	50
Gap count	15	34	2
Qv (Merqury)	58.7032	54.5139	50.0751
Completeness (Merqury), %	99.74	99.74	99.6
LAI	14.41	17.3	15.62
BUSCO assembly Completeness, %	98.3	99.1	99.3
BUSCO annotation assessment, %	97.3	99	98.2
R-AQI	99.23	99.21	99.56
S-AQI	99.78	99.78	99.93

## Sheet: Table6
Supplementary Table 6. Coordinates of gaps in Digiatria assemblies.
Species	Chr	Start (bp)	End (bp)	Size (bp)
D. sanguinalis	Chr17	36624195	36624395	200
D. sanguinalis	Chr22	14955806	14956006	200
D. radicosa	Chr01	278000	278100	100
D. radicosa	Chr02	15418552	15418652	100
D. radicosa	Chr02	15494066	15494166	100
D. radicosa	Chr02	66266436	66266536	100
D. radicosa	Chr02	66332132	66332232	100
D. radicosa	Chr03	3035193	3035293	100
D. radicosa	Chr03	65105085	65105185	100
D. radicosa	Chr04	244323	244423	100
D. radicosa	Chr04	311638	311738	100
D. radicosa	Chr05	47061213	47061313	100
D. radicosa	Chr06	39098	39198	100
D. radicosa	Chr06	107556	107656	100
D. radicosa	Chr07	27835041	27835141	100
D. radicosa	Chr08	41498	41598	100
D. radicosa	Chr09	1916154	1916254	100
D. milanjiana	Chr01	57470	57570	100
D. milanjiana	Chr02	770008	770108	100
D. milanjiana	Chr02	831840	831940	100
D. milanjiana	Chr02	868206	868306	100
D. milanjiana	Chr03	59448524	59448624	100
D. milanjiana	Chr03	59487510	59487610	100
D. milanjiana	Chr03	59598824	59598924	100
D. milanjiana	Chr03	59625094	59625194	100
D. milanjiana	Chr04	47370137	47370237	100
D. milanjiana	Chr04	47413440	47413540	100
D. milanjiana	Chr04	47509373	47509473	100
D. milanjiana	Chr05	19310556	19310656	100
D. milanjiana	Chr06	36816421	36816521	100
D. milanjiana	Chr07	60489	60589	100
D. milanjiana	Chr07	154725	154825	100
D. milanjiana	Chr07	212045	212145	100
D. milanjiana	Chr07	302656	302756	100
D. milanjiana	Chr08	26150032	26150132	100
D. milanjiana	Chr08	41775541	41775641	100
D. milanjiana	Chr09	5251120	5251220	100
D. milanjiana	Chr09	45095334	45095434	100
D. milanjiana	Chr10	10430649	10430749	100
D. milanjiana	Chr13	34367391	34367491	100
D. milanjiana	Chr15	395711	395811	100
D. milanjiana	Chr15	446973	447073	100
D. milanjiana	Chr15	538403	538503	100
D. milanjiana	Chr15	18421110	18421210	100
D. milanjiana	Chr16	186004	186104	100
D. milanjiana	Chr16	215744	215844	100
D. milanjiana	Chr16	275198	275298	100
D. milanjiana	Chr16	340987	341087	100
D. milanjiana	Chr16	415675	415775	100
D. milanjiana	Chr18	7265720	7265820	100
D. milanjiana	Chr18	31267097	31267197	100

## Sheet: Table7
Supplementary Table 7. Metadata of 579 re-sequenced Digitaria accessions in this study.
ID	Years	Location	latitude	longitude	Alititude	Collection environment	Species	Variety	DataSize (Gbase)	Genome Coverage to CH (%)	Genome Coverage to DH (%)	Genome Coverage to EH (%)	Reads mapping rate (%)	Chloroplast type	Genome size estimated by flow cytometry (Mb)	Genome size estimated by 21-mer (Mb)
23-1-3	2023	Shandong, China	35.8661	116.195	38	Agricultural	D. sanguinalis	D. sanguinalis var. pubescens	14.83	99.6744	99.53	98.6411	97.98	Clade4
23-2-28	2023	Shanxi, China	39.1943	113.245	934	Agricultural	D. sanguinalis	D. sanguinalis (Admix-C4)	20.08	98.8844	99.4778	99.14	96.45	Clade4
23-1-59	2023	Shanxi, China	35.4776	111.64	862	Agricultural	D. sanguinalis	D. sanguinalis var. pubescens	18.65	99.23	99.5522	98.4233	98.15	Clade4
13-38	2013	Henan, China	33.0024	113.633	106	NA	D. sanguinalis	D. sanguinalis (Admix-C4)	28	98.9889	99.22	98.9022	96.3	Clade3
23-3-36	2023	Shandong, China	36.9067	119.874	67	Agricultural	D. sanguinalis	D. sanguinalis (Admix-C4)	26	98.9222	99.2833	99.0022	95.93	Clade3
W-148	2023	Sichuan, China	30.7351	105.486	374	NA	D. sanguinalis	D. sanguinalis var. parvispicula	14.91	99.1411	99.1922	98.4711	97.88	Clade3
20-1	2020	NA	NA	NA	NA	NA	D. sanguinalis	D. sanguinalis (Admix-E12)	13	98.9067	99.2256	98.6233	97.28	Clade3
23-1-15	2023	Anhui, China	33.5857	116.325	34	Agricultural	D. sanguinalis	D. sanguinalis var. pubescens	29	98.6922	99.05	98.8789	97.46	Clade4
23-1-36	2023	Henan, China	33.6595	113.19	97	Agricultural	D. sanguinalis	D. sanguinalis (Admix-C4)	10	98.7278	98.8833	98.9411	95.4	Clade3
15-59	2015	Shandong, China	36.0871	117.433	190	NA	D. sanguinalis	D. sanguinalis (Admix-E2S)	22.65	98.9967	99.2633	98.1956	95.14	Clade4
23-2-1	2023	Shandong, China	36.9402	116.644	23	Agricultural	D. sanguinalis	D. sanguinalis var. pubescens	12	99.2833	99.3678	97.95	97.26	Clade1
23-2-16	2023	Hebei, China	39.4445	116.305	26	Agricultural	D. sanguinalis	D. sanguinalis var. pubescens	13	99.3933	99.2011	97.9356	96.76	Clade3
13-41	2013	Shandong, China	36.1909	118.177	283	NA	D. sanguinalis	D. sanguinalis var. sanguinalis	21	98.9267	98.9589	98.4444	97.75	Clade4
13-56	2013	Henan, China	34.8622	114.825	73	NA	D. sanguinalis	D. sanguinalis var. sanguinalis	53	98.7544	99.2756	98.2844	98.39	Clade3		1242.28
15-68	2015	Shandong, China	34.9635	116.203	42	NA	D. sanguinalis	D. sanguinalis (Admix-E1S)	17	99.2167	98.9922	97.9656	95.54	Clade3
15-83	2015	Shandong, China	35.0179	115.851	44	NA	D. sanguinalis	D. sanguinalis (Admix-E2S)	11	98.7622	99.1378	98.4544	97.43	Clade3
18-3	2018	Shandong, China	35.12	117.173	73	NA	D. sanguinalis	D. sanguinalis (Admix-E2S)	21	98.8211	99.2111	98.3578	96.12	Clade3
W-100	2023	Heilongjiang, China	45.491	128.476	114.9	NA	D. sanguinalis	D. sanguinalis var. glabra	11	99.1367	99.1211	98.0222	97.33	Clade4
W-83	2023	Jilin, China	43.2724	124.443	197	NA	D. sanguinalis	D. sanguinalis var. sanguinalis	21.14	99.0622	99.0689	98.0867	97.48	Clade4
23-3-44	2023	Shandong, China	36.7122	120.515	35	Agricultural	D. sanguinalis	D. sanguinalis (Admix-E2S)	14.52	98.7356	99.0333	98.2689	98.37	Clade4
W-2	2023	Jiangsu, China	33.0659	120.362	18.31	Agricultural	D. sanguinalis	D. sanguinalis (Admix-E2S)	13	99.1111	98.9767	97.8411	97.5	Clade3
NT2	2023	Jiangsu, China	31.9781	120.978	4	Natural	Outlier	Outlier	15	98.9833	98.7478	98.1778	57.44	NA
MT-13-22	2013	Shanxi, China	34.8603	110.467	359	NA	D. sanguinalis	D. sanguinalis var. pubescens	13	98.5422	99.0344	98.0944	97.66	Clade4
15-9	2015	Anhui, China	33.4887	117.917	20	NA	D. sanguinalis	D. sanguinalis (Admix-E2S)	22	98.8189	99.1467	97.9189	98.51	Clade1
23-2-37	2023	Shanxi, China	36.8382	112.875	1004	Agricultural	D. sanguinalis	D. sanguinalis (Admix-C4)	10	98.6267	99.0711	98.2756	95.64	Clade3
19-3	2019	Shandong, China	36.8516	116.236	30	NA	D. sanguinalis	D. sanguinalis (Admix-C4)	15.38	98.5444	98.9144	98.3089	96.97	Clade3
23-1-32	2023	Henan, China	33.5373	113.611	74	Agricultural	D. sanguinalis	D. sanguinalis (Admix-E2S)	21	98.7622	99.2056	97.7211	96.73	Clade4
16-8	2016	Shandong, China	36.1349	116.823	159	NA	D. sanguinalis	D. sanguinalis var. pubescens	25	99.0056	99.2267	97.4133	95.97	NA
15-112	2015	Hebei, China	39.5815	118.09	10	NA	D. sanguinalis	D. sanguinalis var. pubescens	15.82	99.0322	99.0644	97.6544	98.05	Clade4
15-86	2015	Henan, China	34.4053	115.834	47	NA	D. sanguinalis	D. sanguinalis (Admix-E2S)	12	98.9344	99.1267	97.5922	98.56	Clade4
15-54	2015	Henan, China	33.1818	113.086	158	NA	D. sanguinalis	D. sanguinalis (Admix-E2S)	16.06	98.69	99.0678	97.7567	98.04	Clade4
15-22	2015	Jiangsu, China	34.4471	119.146	4	NA	D. sanguinalis	D. sanguinalis (Admix-E2S)	27	98.7889	99.0367	97.6767	97.56	Clade4
23-1-18	2023	Anhui, China	33.1915	116.259	29	Agricultural	D. sanguinalis	D. sanguinalis (Admix-E2S)	14	98.7956	98.8211	97.8611	97.57	Clade4
15-97	2015	Shanxi, China	35.6473	111.482	466	NA	D. sanguinalis	D. sanguinalis var. pubescens	19	99.2644	99.2622	96.8433	97.06	Clade4
23-3-50	2023	Shandong, China	36.9338	119.394	6	Agricultural	D. sanguinalis	D. sanguinalis var. sanguinalis	36	98.7	99.0511	97.7033	98.15	Clade4
W-68	2023	Heilongjiang, China	46.741	127.147	182.5	Natural	D. sanguinalis	D. sanguinalis var. glabra	18	98.8878	99.0033	97.41	97.35	Clade4
23-1-22	2023	Anhui, China	33.046	115.268	37	Agricultural	D. sanguinalis	D. sanguinalis var. pubescens	18.98	98.5233	99.0389	97.4933	99.13	Clade4
21-24	2021	Henan, China	34.1196	115.705	46	NA	D. sanguinalis	D. sanguinalis var. parvispicula	33.23	98.7133	98.7678	97.5344	95.53	Clade4
15-42	2015	Shanxi, China	34.5503	110.253	525	NA	Outlier	Outlier	22.26	98.8578	98.1944	98.0078	93.78	NA
21-19	2021	Jiangsu, China	34.0887	119.211	5	NA	D. sanguinalis	D. sanguinalis (Admix-E2S)	17	98.76	98.6844	97.5889	96.94	Clade3
21-27	2021	Jiangsu, China	33.4657	118.222	11	NA	D. sanguinalis	D. sanguinalis var. sanguinalis	12	98.6356	98.7744	97.7056	96.74	Clade4
23-1-30	2023	Henan, China	33.5489	114.618	51	Agricultural	D. sanguinalis	D. sanguinalis (Admix-E2S)	14.32	98.5467	98.7856	97.6433	92.77	Clade4
W-101	2023	Hainan, China	18.4276	109.177	26	NA	Outlier	Outlier	49	99.3433	98.8756	96.7922	84.72	NA
W-128	2023	Liaoning, China	41.0349	119.794	341	NA	D. sanguinalis	D. sanguinalis var. pubescens	48	98.6567	98.6944	97.4967	97.66	Clade3		1232.48
23-2-34	2023	Shanxi, China	37.6064	112.276	765	Agricultural	D. sanguinalis	D. sanguinalis var. pubescens	19	98.9111	99.1389	96.7744	97.46	Clade4
MMT-13-11	2013	Shandong, China	36.7807	119.227	14	NA	D. sanguinalis	D. sanguinalis var. pubescens	14	98.9467	98.6978	96.99	97.27	Clade4
15-103	2015	Shandong, China	37.1962	116.873	21	NA	D. sanguinalis	D. sanguinalis var. sanguinalis	30.94	98.6156	98.6911	97.3967	98.09	Clade4
21-11	2021	Anhui, China	33.6228	115.892	35	NA	D. sanguinalis	D. sanguinalis var. parvispicula	12	99.0556	98.0844	97.6	96.27	Clade3
23-2-4	2023	Shandong, China	37.3758	116.41	24	Agricultural	D. sanguinalis	D. sanguinalis var. pubescens	14	98.8978	99.1111	96.7089	97.48	Clade3
NT1	2023	Jiangsu, China	31.9781	120.977	4	Natural	Outlier	Outlier	16	98.6111	98.6956	97.3022	53.66	NA
23-1-2	2023	Shandong, China	35.9186	116.302	41	Agricultural	D. sanguinalis	D. sanguinalis (Admix-C4)	11	98.5811	98.1411	97.9022	96.1	Clade4
23-3-64	2023	Shandong, China	37.7413	117.014	14	Agricultural	D. sanguinalis	D. sanguinalis var. sanguinalis	15	98.4633	98.6511	97.6444	98.1	Clade4
23-3-12	2023	Jiangsu, China	34.2778	117.699	29	Agricultural	D. sanguinalis	D. sanguinalis var. parvispicula	17.4	98.7856	98.3744	97.3656	98.15	Clade4
23-3-31	2023	Shandong, China	36.7558	118.591	46	Agricultural	D. sanguinalis	D. sanguinalis var. sanguinalis	10	98.2711	98.6378	97.7078	97.42	Clade3
13-57	2013	Shandong, China	37.7359	117.238	11	NA	D. sanguinalis	D. sanguinalis (Admix-E12)	29	98.45	98.7556	97.1389	97.58	Clade3
23-2-6	2023	Hebei, China	37.8687	116.182	19	Agricultural	D. sanguinalis	D. sanguinalis var. pubescens	15.21	98.4378	98.76	97.2533	98.75	Clade4
23-2-7	2023	Hebei, China	37.8927	116.286	16	Agricultural	D. sanguinalis	D. sanguinalis var. pubescens	26	98.7211	98.7467	97.02	97.77	Clade4
15-66	2015	Shanxi, China	34.8728	110.455	347	NA	D. sanguinalis	D. sanguinalis var. pubescens	38	99.03	98.7	96.6433	96.53	Clade3
23-3-32	2023	Shandong, China	36.7228	118.763	41	Natural	D. sanguinalis	D. sanguinalis var. pubescens	20	98.4289	98.6778	97.1289	98.58	Clade4
23-2-41	2023	Shanxi, China	36.5057	113.393	729	Agricultural	D. sanguinalis	D. sanguinalis var. pubescens	13	98.6667	98.7022	96.9978	97.47	Clade3
MT-13-25	2013	Hebei, China	37.3533	115.973	30	NA	D. sanguinalis	D. sanguinalis var. pubescens	22	98.4611	98.9122	96.9411	96.66	Clade4
FZ1	2023	Jiangxi, China	27.62	116.37	85	NA	D. sanguinalis	D. sanguinalis var. pubescens	20	98.7478	98.5089	96.8889	97.52	Clade4
13-47	2013	Shandong, China	37.3882	117.977	10	NA	D. sanguinalis	D. sanguinalis var. pubescens	18.26	98.5467	98.7189	96.89	98.42	Clade4
YZGJ1	2023	Jiangsu, China	32.4027	119.377	10	Natural	D. sanguinalis	D. sanguinalis var. sanguinalis	27	98.3911	98.4478	97.0511	97.18	Clade4
23-1-14	2023	Henan, China	34.1172	116.46	39	Agricultural	D. sanguinalis	D. sanguinalis (Admix-E2S)	18.4	98.6156	98.3656	97.0778	97.84	Clade4
W-138	2023	Shanxi, China	34.2432	108.404	414	NA	D. sanguinalis	D. sanguinalis (Admix-E1S)	24	98.57	98.7356	96.78	98.12	Clade4
15-34	2015	Shandong, China	34.7666	118.087	37	NA	D. sanguinalis	D. sanguinalis var. sanguinalis	18	98.4189	98.7556	97.0522	98.04	Clade4
15-67	2015	Shanxi, China	35.3629	111.231	470	NA	D. sanguinalis	D. sanguinalis var. pubescens	27	98.9811	98.6589	96.3767	96.46	Clade3
13-50	2013	Shandong, China	35.9553	116.578	55	NA	D. sanguinalis	D. sanguinalis var. sanguinalis	24	98.6622	98.5456	96.8067	97.57	Clade4
21-10	2021	Shandong, China	35.4054	116.019	42	NA	D. sanguinalis	D. sanguinalis var. pubescens	22	98.6033	98.76	96.64	98.29	Clade4
21-12	2021	Anhui, China	33.9576	115.786	42	NA	D. sanguinalis	D. sanguinalis (Admix-E2S)	18	98.5244	98.97	96.6989	96.95	Clade4
23-1-17	2023	Anhui, China	33.1936	116.338	28	Agricultural	D. sanguinalis	D. sanguinalis (Admix-E2S)	18.6	98.3422	98.5333	96.9789	98.29	Clade4
MMT-13-6	2013	Shanxi, China	37.0327	111.924	754	NA	D. sanguinalis	D. sanguinalis var. pubescens	29	98.6022	98.3933	96.9756	97.75	Clade4
MMT-13-19	2013	Shandong, China	36.764	119.65	47	NA	D. sanguinalis	D. sanguinalis var. sanguinalis	27	98.3156	98.4067	97.2211	97.48	Clade4
15-55	2015	Shandong, China	36.0314	119.197	77	NA	D. sanguinalis	D. sanguinalis var. pubescens	14.52	98.3722	98.6333	97.0133	97.96	Clade4
23-1-16	2023	Anhui, China	33.4681	116.416	29	Agricultural	D. sanguinalis	D. sanguinalis var. parvispicula	23	98.6878	98.7756	96.33	97.62	Clade4
21-2	2021	Shandong, China	35.687	117.968	179	NA	D. sanguinalis	D. sanguinalis var. sanguinalis	28	98.2733	98.58	97.2	96.77	Clade3
W-23	2023	Guizhou, China	26.4713	105.542	1105.3	Agricultural	D. sanguinalis	D. sanguinalis var. parvispicula	15.35	97.8989	98.5256	97.3689	97.35	Clade4
16-12	2016	Shandong, China	36.6622	117.85	109	NA	D. sanguinalis	D. sanguinalis var. sanguinalis	21	98.4778	98.3678	97.0611	96.93	Clade4
23-1-44	2023	Henan, China	34.0599	111.055	562	Agricultural	D. sanguinalis	D. sanguinalis (Admix-E2S)	21.43	98.5178	98.7367	96.7	98.95	Clade4
23-1-76	2023	Shandong, China	36.266	116.177	39	Agricultural	D. sanguinalis	D. sanguinalis var. sanguinalis	14.78	98.13	98.3033	97.3833	98.52	Clade4
23-3-20	2023	Jiangsu, China	34.6477	119.121	1	Agricultural	D. sanguinalis	D. sanguinalis var. sanguinalis	37	98.4344	98.1011	97.2711	98.11	Clade3
HZ3	2023	Zhejiang, China	30.1708	120.286	13	Natural	D. sanguinalis	D. sanguinalis var. parvispicula	18	98.5522	97.6789	97.6078	98.23	Clade4
MT-13-26	2013	Hebei, China	38.196	116.13	13	NA	D. sanguinalis	D. sanguinalis var. pubescens	12	98.4256	98.4689	96.8944	97.47	Clade4
15-52	2015	Henan, China	36.0561	115.317	46	NA	D. sanguinalis	D. sanguinalis var. pubescens	16.32	98.3511	98.5211	96.8811	98.31	Clade4
23-3-4	2023	Shandong, China	35.5932	117.082	86	Agricultural	D. sanguinalis	D. sanguinalis var. sanguinalis	22	98.2044	98.8578	96.9811	97.01	Clade4
MT-13-17	2013	Anhui, China	33.6521	116.971	28	NA	D. sanguinalis	D. sanguinalis (Admix-E2S)	23	98.1589	98.7244	96.9622	97.17	Clade4
21-5	2021	Shandong, China	36.0081	116.795	148	NA	D. sanguinalis	D. sanguinalis var. sanguinalis	14	98.6967	98.6978	96.4811	97.73	Clade3
23-1-66	2023	Henan, China	35.5715	114.254	71	Agricultural	D. sanguinalis	D. sanguinalis (Admix-E12)	12	98.37	98.9367	96.5856	97.85	Clade4
13-48	2013	Henan, China	35.581	114.526	60	NA	D. sanguinalis	D. sanguinalis var. pubescens	24	98.6722	98.5089	96.5078	98.53	Clade4
13-52	2013	Hebei, China	36.7759	114.486	67	NA	D. sanguinalis	D. sanguinalis var. pubescens	15.13	98.43	98.2178	97.0589	98.66	Clade4
MMT-13-24	2013	Shandong, China	37.1826	119.949	53	NA	D. sanguinalis	D. sanguinalis var. sanguinalis	16	98.2856	98.3033	97.13	97.06	Clade4
23-3-63	2023	Shandong, China	37.6598	117.163	11	Agricultural	D. sanguinalis	D. sanguinalis var. sanguinalis	23	98.21	98.3433	97.1378	95.75	Clade3
23-3-7	2023	Shandong, China	35.0082	117.213	63	Agricultural	D. sanguinalis	D. sanguinalis var. sanguinalis	28	98.4167	98.3222	97.0789	97.45	Clade3
23-1-24	2023	Henan, China	32.983	114.565	48	Agricultural	D. sanguinalis	D. sanguinalis (Admix-E2S)	41	98.0889	98.7667	96.7689	98.25	Clade4		1201.98
23-1-81-2	2023	Shandong, China	36.2718	115.711	40	Agricultural	D. sanguinalis	D. sanguinalis var. pubescens	22	98.3256	98.5544	96.7956	97.39	Clade4
23-3-55	2023	Shandong, China	37.4548	118.588	4	Agricultural	D. sanguinalis	D. sanguinalis var. pubescens	25	98.5522	98.0922	96.8989	97.82	Clade4
15-24	2015	Anhui, China	33.6846	117.307	23	NA	D. sanguinalis	D. sanguinalis (Admix-E2S)	25	98.1233	98.68	96.9089	94.63	Clade3
15-3	2015	Anhui, China	33.0174	115.965	30	NA	D. sanguinalis	D. sanguinalis (Admix-E2S)	16.63	98.4289	98.3756	96.7233	98.12	Clade4
15-75	2015	Henan, China	35.7622	114.69	58	NA	D. sanguinalis	D. sanguinalis var. pubescens	19	98.28	98.6356	96.6889	96.79	Clade3
W-61	2023	Heilongjiang, China	44.5736	129.458	285	Agricultural	Outlier	Outlier	18.4	98.5144	98.3867	96.7467	54.55	NA
15-56	2015	Shandong, China	34.8465	116.044	42	NA	D. sanguinalis	D. sanguinalis var. pubescens	25	98.3522	98.5511	96.5622	97.75	Clade4
15-74	2015	Shanxi, China	35.6104	110.989	394	NA	D. sanguinalis	D. sanguinalis (Admix-E1S)	21.68	97.9967	98.6711	97.0122	98.76	Clade4
15-8	2015	Hebei, China	37.6219	114.618	50	NA	D. sanguinalis	D. sanguinalis var. pubescens	17	98.2967	98.2878	96.96	97.54	Clade4
23-1-38	2023	Henan, China	33.913	112.647	307	Agricultural	D. sanguinalis	D. sanguinalis (Admix-E2S)	17	98.1444	98.4311	96.8244	96.65	Clade4
23-3-14	2023	Jiangsu, China	33.9529	118.373	16	Agricultural	D. sanguinalis	D. sanguinalis var. sanguinalis	24	98.1867	98.38	97.05	98.01	Clade4
21-7	2021	Shandong, China	35.8837	116.141	38	NA	D. sanguinalis	D. sanguinalis (Admix-E12)	17	98.6378	98.1489	96.6644	95.94	Clade3
AHCZ1	2023	Anhui, China	32.53	117.7	75	NA	D. sanguinalis	D. sanguinalis (Admix-E2S)	26.13	98.3189	98.4756	96.7367	95.85	Clade4
MT-13-5	2013	Shandong, China	36.7807	119.227	14	NA	D. sanguinalis	D. sanguinalis var. sanguinalis	13	98.1556	98.3844	96.9333	97.28	Clade4
15-6	2015	Hebei, China	36.3804	114.38	70	NA	D. sanguinalis	D. sanguinalis var. pubescens	14.91	98.1822	98.5511	96.6956	97.81	Clade4
23-1-13	2023	Henan, China	34.1848	116.514	41	Agricultural	D. sanguinalis	D. sanguinalis (Admix-E2S)	21	98.5167	98.52	96.52	97.15	Clade4
23-3-51	2023	Shandong, China	37.2468	118.893	0	Agricultural	D. sanguinalis	D. sanguinalis var. sanguinalis	17.83	98.5589	98.5856	96.2633	98.45	Clade4
W-93	2023	Jilin, China	43.4642	126.47	303	NA	D. sanguinalis	D. sanguinalis var. glabra	43	98.3722	98.8533	96.26	97.48	Clade3		1259.44
15-70	2015	Shandong, China	34.7786	117.596	194	NA	D. sanguinalis	D. sanguinalis var. sanguinalis	10	98.3178	97.9367	97.2389	96.6	NA
23-1-64	2023	Shanxi, China	35.8615	113.18	1080	Natural	D. sanguinalis	D. sanguinalis var. pubescens	10	97.9656	99.1389	97.0511	96.73	Clade3
W-141	2023	Henan, China	33.1812	114.845	42	NA	D. sanguinalis	D. sanguinalis (Admix-E1S)	23.08	98.0944	97.9589	97.2167	95.75	Clade4
13-51	2013	Shandong, China	36.2517	117.45	161	NA	D. sanguinalis	D. sanguinalis var. sanguinalis	25	98.1233	98.48	97.0033	97.61	Clade3
16-2	2016	Shandong, China	36.4909	117.123	285	NA	D. sanguinalis	D. sanguinalis var. pubescens	11	98.2678	98.3411	96.8011	97.39	Clade3
13-35	2013	Hebei, China	36.9816	115.274	36	NA	D. sanguinalis	D. sanguinalis var. pubescens	19	98.6244	98.4522	96.3856	97.88	Clade3
23-3-48	2023	Shandong, China	36.4783	119.793	11	Agricultural	D. sanguinalis	D. sanguinalis var. sanguinalis	20	98.1922	98.2022	97.03	97.92	Clade4
MMT-13-13	2013	Shandong, China	35.9553	116.578	55	NA	D. sanguinalis	D. sanguinalis var. sanguinalis	12	98.2678	98.3522	96.7389	97.47	Clade4
13-40	2013	Shandong, China	37.4413	116.366	24	NA	D. sanguinalis	D. sanguinalis var. sanguinalis	32	98.1467	98.2933	97.0311	97.96	Clade4
23-3-18	2023	Jiangsu, China	34.3751	118.698	16	Agricultural	D. sanguinalis	D. sanguinalis var. sanguinalis	21	98.3556	98.2156	96.8811	98.08	Clade4
MMT-13-28	2013	Shandong, China	35.4286	116.405	41	NA	D. sanguinalis	D. sanguinalis var. sanguinalis	23	98.24	98.6578	96.6022	97.82	Clade4
16-9	2016	Shandong, China	36.2059	117.094	232	NA	D. sanguinalis	D. sanguinalis (Admix-E2S)	14	97.9933	98.6244	96.6422	97.52	Clade3
23-1-45	2023	Henan, China	34.0599	111.055	562	Agricultural	D. sanguinalis	D. sanguinalis (Admix-E1S)	25	98.4756	98.1944	96.6256	97.23	Clade4
W-137	2023	Shanxi, China	32.4276	107.881	1028	NA	D. sanguinalis	D. sanguinalis (Admix-E1S)	20	98.5511	98.5411	96.3278	97.14	Clade4
23-1-42	2023	Henan, China	33.7809	111.629	751	Agricultural	D. sanguinalis	D. sanguinalis (Admix-E1S)	26	98.2889	98.5533	96.5622	98.36	Clade4
23-3-9	2023	Shandong, China	36.8755	117.521	20	Agricultural	D. sanguinalis	D. sanguinalis var. pubescens	17.7	98.6133	98.3367	96.5022	97.91	Clade4
15-91	2015	Shandong, China	35.12	117.173	73	NA	D. sanguinalis	D. sanguinalis var. sanguinalis	15.04	98.0178	98.2711	96.8789	98.28	Clade4
23-2-5	2023	Hebei, China	37.886	116.562	12	Agricultural	D. sanguinalis	D. sanguinalis var. pubescens	24	98.3967	98.2256	96.7833	97.46	Clade4
MT-13-30	2013	Hebei, China	38.0069	115.566	29	NA	D. sanguinalis	D. sanguinalis var. pubescens	24	98.2844	98.4233	96.5589	97.4	Clade4
W-53	2023	Henan, China	33.6647	113.702	75	Agricultural	D. sanguinalis	D. sanguinalis (Admix-E2S)	21	98.5411	97.9433	96.7478	97.37	NA
15-118	2015	Shanxi, China	34.3355	108.715	387	NA	D. sanguinalis	D. sanguinalis (Admix-E2S)	23	98.5578	98.53	96.3267	98.09	Clade4
15-40	2015	Beijing, China	39.7543	116.149	50	NA	D. sanguinalis	D. sanguinalis var. pubescens	17.11	98.5256	98.3033	96.5522	98.62	Clade4
15-82	2015	Shanxi, China	35.9764	110.853	971	NA	D. sanguinalis	D. sanguinalis var. sanguinalis	28	98.04	98.7089	96.7533	97.56	Clade4
21-14	2021	Anhui, China	34.1512	117.022	39	NA	D. sanguinalis	D. sanguinalis var. sanguinalis	14	98.6456	98.1967	96.4467	95.96	Clade3
23-3-19	2023	Jiangsu, China	34.4562	118.721	18	Agricultural	D. sanguinalis	D. sanguinalis var. sanguinalis	22.89	98.0033	98.1411	97.0722	96.28	Clade4
MMT-13-5	2013	Shandong, China	36.104	116.971	117	NA	D. sanguinalis	D. sanguinalis var. sanguinalis	20	98.2611	98.31	96.7844	97.42	Clade4
RMT-13-4	2013	NA	NA	NA	NA	NA	D. sanguinalis	D. sanguinalis var. sanguinalis	18	98.1944	98.4078	96.7067	97.38	Clade4
16-1	2016	Shandong, China	36.7227	117.059	24	NA	D. sanguinalis	D. sanguinalis (Admix-E12)	26	98.4756	98.6767	96.1967	98.22	Clade4
W-133	2023	Heilongjiang, China	45.6637	125.42	154	NA	D. sanguinalis	D. sanguinalis (Admix-E2S)	14.42	97.88	98.28	97.0244	97.93	Clade4
13-49	2013	Shandong, China	35.322	115.947	43	NA	D. sanguinalis	D. sanguinalis var. sanguinalis	29	98.5322	98.1367	96.7033	98.14	Clade3
15-106	2015	Shanxi, China	37.1956	112.182	766	NA	D. sanguinalis	D. sanguinalis (Admix-E12)	25	98.4967	98.2711	96.4822	97.86	Clade4
21-26	2021	Jiangsu, China	33.3935	119.721	1	NA	D. sanguinalis	D. sanguinalis var. sanguinalis	13	98.5022	98.0178	96.8844	96.73	Clade3
23-2-3	2023	Shandong, China	37.2224	116.481	21	Agricultural	D. sanguinalis	D. sanguinalis var. pubescens	11	98.2711	98.1644	96.7467	96.5	Clade1
23-3-11	2023	Jiangsu, China	34.3914	117.607	32	Agricultural	D. sanguinalis	D. sanguinalis (Admix-E12)	21	98.71	98.1522	96.1	98.04	Clade4
23-3-30	2023	Shandong, China	36.5625	118.703	211	Agricultural	D. sanguinalis	D. sanguinalis var. sanguinalis	26	98.0444	98.4156	96.8056	97.94	Clade4
15-50	2015	Shandong, China	34.7689	118.271	45	NA	D. sanguinalis	D. sanguinalis var. sanguinalis	15.14	98.2144	97.8944	97.0778	98.31	Clade4
15-94	2015	Shandong, China	36.6904	118.487	87	NA	D. sanguinalis	D. sanguinalis var. pubescens	29	98.1356	98.3356	96.8589	97.8	Clade4
23-2-11	2023	Hebei, China	38.61	116.051	12	Agricultural	D. sanguinalis	D. sanguinalis (Admix-E12)	10	98.5422	98.5933	96.2633	98.08	Clade3
23-2-35	2023	Shanxi, China	37.3937	112.458	774	Agricultural	D. sanguinalis	D. sanguinalis var. pubescens	22	98.38	98.5011	96.1822	97.1	Clade4
W-131	2023	Liaoning, China	41.2619	119.919	255	NA	D. sanguinalis	D. sanguinalis var. pubescens	27	98.3156	98.6444	96.2022	97.91	Clade3
W-145	2023	Henan, China	33.2456	114.852	43	NA	D. sanguinalis	D. sanguinalis (Admix-E1S)	17.69	98.0633	97.8722	97.0622	97.6	Clade4
W-5	2023	Ningxia, China	37.87	106.19	1132	Agricultural	D. sanguinalis	D. sanguinalis var. pubescens	10	98.2433	98.2344	96.6033	97.23	Clade4
15-43	2015	Henan, China	34.5106	115.323	59	NA	D. sanguinalis	D. sanguinalis (Admix-E12)	19	98.0922	98.5344	96.58	95.89	Clade3
23-1-53	2023	Shanxi, China	35.0378	110.047	534	Agricultural	D. sanguinalis	D. sanguinalis (Admix-E2S)	19.4	98.2667	98.3211	96.4889	98.83	Clade4
23-1-81	2023	Shandong, China	36.2718	115.711	40	Agricultural	D. sanguinalis	D. sanguinalis var. pubescens	13	98.3556	98.4289	96.4133	97.39	Clade4
23-2-53	2023	Shandong, China	36.759	115.589	38	Agricultural	D. sanguinalis	D. sanguinalis var. sanguinalis	18	98.0556	98.2378	96.8922	97.74	Clade4
AJ2	2023	Zhejiang, China	31.0635	119.663	85	Natural	D. sanguinalis	D. sanguinalis var. parvispicula	17	98.6011	98.2978	96.2378	97.28	Clade4
MT-13-16	2013	Hebei, China	39.6366	118.186	49	NA	D. sanguinalis	D. sanguinalis (Admix-E12)	10	97.8689	98.57	96.7478	97.58	Clade3
13-59	2013	Henan, China	33.0138	113.049	151	NA	D. sanguinalis	D. sanguinalis (Admix-E2S)	17.2	97.9811	98.0556	97.0056	98.38	Clade4
21-17	2021	Jiangsu, China	34.2534	119.159	4	NA	D. sanguinalis	D. sanguinalis var. sanguinalis	16	98.4089	98.2489	96.5511	97.32	Clade3
23-3-22	2023	Jiangsu, China	34.8368	118.891	16	Agricultural	D. sanguinalis	D. sanguinalis var. sanguinalis	17.76	98.0867	98.2367	96.8878	98.04	Clade4
W-146-2	2023	Henan, China	33.2292	114.883	39	NA	D. sanguinalis	D. sanguinalis (Admix-E1S)	27	98.1822	98.0667	96.9189	98.07	Clade4
21-21	2021	Jiangsu, China	33.9584	117.917	22	NA	D. sanguinalis	D. sanguinalis var. sanguinalis	16.85	98.0356	98.3889	96.7	97.76	Clade4
21-6	2021	Shandong, China	35.9146	117.775	219	NA	D. sanguinalis	D. sanguinalis var. sanguinalis	17	98.1667	98.3722	96.6033	97.2	Clade3
23-1-6	2023	Shandong, China	35.5714	115.961	42	Agricultural	D. sanguinalis	D. sanguinalis var. pubescens	16	98.2778	98.1744	96.6911	97.86	Clade4
23-1-77	2023	Shandong, China	36.5706	116.394	29	Agricultural	D. sanguinalis	D. sanguinalis var. sanguinalis	24	98.3178	98.5533	96.3511	98.07	Clade3
W-12	2023	Hubei, China	30.445	114.462	1.1	Agricultural	D. sanguinalis	D. sanguinalis var. parvispicula	13	98.2622	98.0511	96.9378	97.03	Clade3
15-125	2015	Anhui, China	33.9677	118.282	23	NA	D. sanguinalis	D. sanguinalis var. sanguinalis	25	98.5911	98.1078	96.3044	98.08	Clade4
15-38	2015	Anhui, China	33.8827	115.785	41	NA	D. sanguinalis	D. sanguinalis var. pubescens	14.82	98.0756	98.0922	96.82	97.76	Clade4
15-93	2015	Shandong, China	37.0158	120.586	99	NA	D. sanguinalis	D. sanguinalis var. sanguinalis	16.76	98.4856	98.29	96.2811	98.09	Clade4
16-3	2016	Shandong, China	36.104	116.971	117	NA	D. sanguinalis	D. sanguinalis var. sanguinalis	13	97.9822	98.3767	96.85	96.56	Clade3
16-7	2016	Shandong, China	36.0898	117.15	126	NA	D. sanguinalis	D. sanguinalis var. sanguinalis	25	98.4744	98.6033	96.0678	95.95	Clade4
19-01	2019	Shandong, China	36.8516	116.236	30	NA	D. sanguinalis	D. sanguinalis var. pubescens	20	98.0022	98.2278	96.6833	97.53	Clade3
21-9	2021	Shandong, China	35.4288	116.046	40	NA	D. sanguinalis	D. sanguinalis var. parvispicula	14	98.3533	97.7478	96.6078	97.43	Clade4
23-3-57	2023	NA	NA	NA	NA	NA	D. sanguinalis	D. sanguinalis var. pubescens	26	98.3167	98.1644	96.64	97.32	Clade3
W-54	2023	Henan, China	33.4693	113.735	75	Agricultural	D. sanguinalis	D. sanguinalis (Admix-E1S)	17	98.2011	98.2611	96.4578	97	Clade4
15-90	2015	Henan, China	35.3096	113.934	72	NA	D. sanguinalis	D. sanguinalis (Admix-E12)	17.53	98.3422	98.5744	96.2367	98.3	Clade4
21-15	2021	Anhui, China	34.4565	116.43	48	NA	D. sanguinalis	D. sanguinalis var. parvispicula	15.05	98.19	97.9078	96.7467	98.11	Clade4
23-3-3	2023	Shandong, China	35.728	117.294	156	Agricultural	D. sanguinalis	D. sanguinalis var. sanguinalis	28	98.1022	98.3633	96.5522	95.25	Clade4
MT-13-29	2013	Shandong, China	34.9085	117.178	47	NA	D. sanguinalis	D. sanguinalis var. sanguinalis	14	98.27	98.1567	96.4556	97.04	Clade4
W-59	2023	Henan, China	33.464	113.662	82	Agricultural	D. sanguinalis	D. sanguinalis (Admix-E2S)	10	98.1089	98.1022	96.8078	97.01	Clade3
15-17	2015	Tianjin, China	39.7676	117.344	7	NA	D. sanguinalis	D. sanguinalis var. pubescens	15	98.2189	98.5111	96.4156	97.08	Clade3
MMT-13-23	2013	Shanxi, China	36.0937	111.526	458	NA	D. sanguinalis	D. sanguinalis var. pubescens	16	98.1722	98.6011	96.1733	97.79	Clade4
QZ2	2023	Zhejiang, China	29.0946	118.965	83	Natural	D. sanguinalis	D. sanguinalis var. parvispicula	10	98.4533	98.5978	95.8167	97.58	Clade4
15-113	2015	Shanxi, China	35.6019	110.719	424	NA	D. sanguinalis	D. sanguinalis var. pubescens	26	97.9667	98.3233	96.6333	98.05	Clade4
23-1-78	2023	Shandong, China	36.4636	116.263	32	Agricultural	D. sanguinalis	D. sanguinalis var. pubescens	15	98.2422	98.4789	96.4433	97.78	Clade4
23-2-9	2023	Hebei, China	38.196	116.13	13	Agricultural	D. sanguinalis	D. sanguinalis (Admix-E1S)	16.74	97.9767	98.4622	96.6533	98.84	Clade4
15-12	2015	Shanxi, China	36.2595	111.682	471	NA	D. sanguinalis	D. sanguinalis (Admix-E1S)	14.91	98.3422	98.3811	96.0767	98.13	Clade4
16-11	2016	Shandong, China	36.2264	117.452	166	NA	D. sanguinalis	D. sanguinalis var. sanguinalis	14	98.2289	98.2222	96.6189	97.63	Clade4
16-6	2016	Shandong, China	36.6855	117.533	114	NA	D. sanguinalis	D. sanguinalis (Admix-E12)	19	98.0167	98.5078	96.55	96.92	Clade3
19-5	2019	Shandong, China	35.12	117.173	73	NA	D. sanguinalis	D. sanguinalis (Admix-E2S)	15.1	98.1611	97.6333	97.14	98.57	Clade4
23-2-15	2023	Hebei, China	39.448	116.31	29	Agricultural	D. sanguinalis	D. sanguinalis var. pubescens	18.01	97.9511	98.5589	96.6222	98.47	Clade4
23-3-16	2023	Jiangsu, China	34.0057	118.595	15	Agricultural	D. sanguinalis	D. sanguinalis (Admix-E2S)	13	98.2456	97.8422	96.8967	97.47	Clade3
23-1-1	2023	Shandong, China	35.9419	116.478	97	Agricultural	D. sanguinalis	D. sanguinalis var. sanguinalis	19	98.4778	98.1644	96.31	97.08	Clade4
W-96	2023	Fujian, China	26.3485	119.087	755	NA	D. sanguinalis	D. sanguinalis var. parvispicula	26	98.1633	98.1233	96.6911	97.19	Clade3
13-62	2013	Shandong, China	36.6904	118.487	87	NA	D. sanguinalis	D. sanguinalis var. sanguinalis	18	97.9944	97.6033	97.1133	97.89	Clade3
15-129	2015	Shanxi, China	34.4926	109.719	356	NA	D. sanguinalis	D. sanguinalis (Admix-E1S)	20	98.2489	98.4489	96.13	97.44	Clade4
21-13	2021	Anhui, China	34.2481	116.817	41	NA	D. sanguinalis	D. sanguinalis (Admix-E2S)	16	98.2822	98.7567	95.9844	95.34	Clade3
23-1-41	2023	Henan, China	34.1106	112.159	537	Agricultural	D. sanguinalis	D. sanguinalis (Admix-E2S)	15	98.2544	98.1233	96.4756	97.74	Clade4
SX3	2023	Zhejiang, China	29.5233	120.327	51	Natural	D. sanguinalis	D. sanguinalis var. parvispicula	12	98.2722	98.3022	96.2656	98.42	Clade4
23-1-70	2023	Henan, China	35.8295	115.601	46	Agricultural	D. sanguinalis	D. sanguinalis var. pubescens	12	98.2322	98.1333	96.6144	96.59	Clade3
23-1-72	2023	Shandong, China	36.0843	115.638	38	Agricultural	D. sanguinalis	D. sanguinalis var. sanguinalis	20	98.0322	98.1922	96.6922	97.82	Clade3
23-2-39	2023	Shanxi, China	36.5191	112.931	952	Agricultural	D. sanguinalis	D. sanguinalis var. pubescens	28	98.6278	98.3311	95.9456	97.85	Clade4
MT-13-4	2013	Anhui, China	33.4977	117.981	23	NA	D. sanguinalis	D. sanguinalis var. pubescens	19	98.3044	98.44	96.1889	97.6	Clade4
W-25	2023	Guizhou, China	26.24	106.37	1095.2	Agricultural	D. sanguinalis	D. sanguinalis var. parvispicula	28.07	98.24	97.4811	96.9667	97.91	Clade4
13-34	2013	Hebei, China	38.88	115.471	21	NA	D. sanguinalis	D. sanguinalis var. pubescens	11	98.2778	98.2644	96.1544	96.96	Clade4
15-25	2015	Henan, China	33.6325	113.364	88	NA	D. sanguinalis	D. sanguinalis (Admix-E2S)	11	98.0222	98.1322	96.6133	98.2	Clade4
15-87	2015	Shandong, China	35.4133	116.349	39	NA	D. sanguinalis	D. sanguinalis var. sanguinalis	12	98.4289	98.14	96.3778	98.15	Clade4
23-2-19	2023	Hebei, China	39.3948	115.722	33	Agricultural	D. sanguinalis	D. sanguinalis var. pubescens	14	98.2611	98.6211	96.0967	97.18	Clade3
23-2-29	2023	Shanxi, China	39.0634	112.963	854	Agricultural	D. sanguinalis	D. sanguinalis var. pubescens	13	98.4089	98.2911	96.2922	97.69	Clade4
23-3-5	2023	Shandong, China	35.4113	117.072	110	Agricultural	D. sanguinalis	D. sanguinalis var. sanguinalis	16	98.24	98.2167	96.4089	97.89	Clade3
QZ6	2023	Zhejiang, China	28.9132	119.206	180	Natural	D. sanguinalis	D. sanguinalis var. parvispicula	16	98.23	97.9133	96.56	99.02	Clade3
RMT-13-6	2013	Hebei, China	39.6366	118.186	49	NA	D. sanguinalis	D. sanguinalis (Admix-E12)	23	98.1211	98.4322	96.4811	97.15	Clade4
SX6	2023	Zhejiang, China	30.0758	120.595	9	Disturbed	D. sanguinalis	D. sanguinalis var. parvispicula	15	98.0289	98.1956	96.5422	98.61	Clade4
15-53	2015	Shandong, China	34.94	118.474	57	NA	D. sanguinalis	D. sanguinalis var. sanguinalis	14.97	98.4656	98.0211	96.3256	98.07	Clade4
15-71	2015	Shandong, China	37.0985	120.165	155	NA	D. sanguinalis	D. sanguinalis var. sanguinalis	14.41	97.8622	98.0989	96.8	97.98	Clade4
23-3-61	2023	Shandong, China	37.7694	117.508	8	Agricultural	D. sanguinalis	D. sanguinalis (Admix-E12)	13	97.9978	98.3189	96.5033	98.23	Clade4
MT-13-11	2013	Shanxi, China	33.0738	107.029	516	NA	D. sanguinalis	D. sanguinalis var. parvispicula	10	98.4456	97.9556	96.2067	97.47	Clade4
15-27	2015	Shandong, China	36.4628	115.992	36	NA	D. sanguinalis	D. sanguinalis var. pubescens	17	98.0156	98.2344	96.6344	97.6	Clade4
16-4	2016	Shandong, China	36.2088	117.667	197	NA	D. sanguinalis	D. sanguinalis (Admix-E2S)	10	98.8922	97.3511	96.5211	96.18	Clade3
SX7	2023	Zhejiang, China	30.0994	120.573	13	Disturbed	D. sanguinalis	D. sanguinalis var. parvispicula	17	98.2878	98.3411	96.1089	98.34	Clade3
W-136	2023	Shanxi, China	32.6948	109.506	535	NA	D. sanguinalis	D. sanguinalis var. parvispicula	14	98.3989	98.3022	95.8722	97.69	Clade4
15-77	2015	Hebei, China	39.7687	117.8	5	NA	D. sanguinalis	D. sanguinalis var. pubescens	26	98.1622	98.4478	96.1511	96.99	Clade4
23-2-45	2023	Hebei, China	36.8758	114.523	59	Agricultural	D. sanguinalis	D. sanguinalis var. sanguinalis	10	98.0289	98.3044	96.6056	97.77	Clade4
23-2-51	2023	Hebei, China	37.0098	115.653	31	Agricultural	D. sanguinalis	D. sanguinalis var. sanguinalis	19	97.8744	98.2578	96.7778	97.88	Clade4
RMT-13-007	2023	Shandong, China	36.3947	120.454	22	NA	D. sanguinalis	D. sanguinalis var. sanguinalis	15	98.14	98.1978	96.5367	97.17	Clade4
W-55	2023	Henan, China	33.4649	113.672	82	Agricultural	D. sanguinalis	D. sanguinalis (Admix-E2S)	16.43	97.9211	98.4222	96.3567	97.75	Clade4
15-15	2015	Shandong, China	36.3584	120.166	8	NA	D. sanguinalis	D. sanguinalis var. sanguinalis	29	98.2344	97.9989	96.5644	95.32	Clade3
21-18	2021	Jiangsu, China	34.0144	117.837	22	NA	D. sanguinalis	D. sanguinalis var. sanguinalis	19	97.9833	98.0544	96.7544	96	Clade3
23-3-41	2023	Shandong, China	37.4067	120.284	81	Agricultural	D. sanguinalis	D. sanguinalis var. sanguinalis	14	98.2622	98.0444	96.4889	97.55	Clade4
21-4	2021	Shandong, China	36.1933	117.049	153	NA	D. sanguinalis	D. sanguinalis var. sanguinalis	28	98.4711	98.3811	95.7311	96.52	Clade3
13-44	2013	Shandong, China	37.3882	117.977	10	NA	D. sanguinalis	D. sanguinalis (Admix-E12)	14.71	98.1711	98.3533	96.2078	98.33	Clade4
23-2-48	2023	Hebei, China	37.258	114.958	30	Agricultural	D. sanguinalis	D. sanguinalis var. pubescens	16.36	98.0856	98.36	96.2367	98.31	Clade4
MMT-13-2	2013	Shandong, China	36.2517	117.45	161	NA	D. sanguinalis	D. sanguinalis var. sanguinalis	19	98.0111	98.0711	96.5733	97.5	Clade4
W-142	2023	Henan, China	33.1566	114.787	44	NA	D. sanguinalis	D. sanguinalis (Admix-E1S)	15.03	97.8967	97.6878	96.83	98.22	Clade4
W-49	2023	Sichuan, China	30.1549	105.024	423	Agricultural	D. sanguinalis	D. sanguinalis var. parvispicula	14	98.0889	98.3344	96.1789	96.79	Clade4
13-58	2013	Shandong, China	35.4133	116.349	39	NA	D. sanguinalis	D. sanguinalis var. sanguinalis	14	98.8078	98.2344	95.6767	98.43	Clade4
15-108	2015	Hebei, China	37.2929	114.518	78	NA	D. sanguinalis	D. sanguinalis var. pubescens	13	97.9722	98.4278	96.29	95.37	Clade3
21-29	2021	Anhui, China	32.537	117.704	73	NA	D. sanguinalis	D. sanguinalis var. sanguinalis	12	98.1422	98.2989	96.2856	94.71	Clade3
23-1-80	2023	Shandong, China	36.7459	116.776	25	Agricultural	D. sanguinalis	D. sanguinalis var. parvispicula	15.16	98.3778	98.2411	95.8422	97.77	Clade4
23-2-18	2023	Hebei, China	39.3787	115.847	40	Agricultural	D. sanguinalis	D. sanguinalis (Admix-E12)	25	98.0533	98.4089	96.1456	97.15	Clade4
23-2-44	2023	Hebei, China	36.6934	114.495	54	Agricultural	D. sanguinalis	D. sanguinalis var. pubescens	12	98.0278	98.6311	95.9989	97.79	Clade4
MT-13-12	2013	Shanxi, China	34.5412	108.945	404	NA	D. sanguinalis	D. sanguinalis (Admix-E2S)	13	98.06	97.9178	96.7422	97.22	Clade4
MT-13-15	2013	Shanxi, China	34.3473	108.946	380	NA	D. sanguinalis	D. sanguinalis var. pubescens	12	97.6533	98.5956	96.4733	97.14	Clade4
MT-13-18	2013	Tianjin, China	39.0278	116.918	7	NA	D. sanguinalis	D. sanguinalis var. pubescens	18	98.3089	97.9189	96.3711	97.18	Clade4
W-3	2023	Jiangsu, China	32.3361	118.82	7.89	Agricultural	D. sanguinalis	D. sanguinalis var. pubescens	17	97.9711	98.2967	96.4222	97.64	Clade3
15-2	2015	Shandong, China	36.749	117.126	27	NA	D. sanguinalis	D. sanguinalis (Admix-E2S)	16.52	98.3222	98.0522	96.3844	98.1	Clade2
15-63	2015	Shandong, China	36.104	116.971	117	NA	D. sanguinalis	D. sanguinalis var. sanguinalis	17	98.2267	98.2822	96.0278	95.72	Clade3
23-2-2	2023	Shandong, China	37.1376	116.531	20	Agricultural	D. sanguinalis	D. sanguinalis var. sanguinalis	11	97.9778	98.4867	96.2433	97.09	Clade3
15-126	2015	Shandong, China	36.389	119.762	23	Agricultural	D. sanguinalis	D. sanguinalis (Admix-E2S)	15.18	98.3367	98.3922	95.8456	98.09	Clade4
15-29	2015	Shanxi, China	34.3727	109.22	465	NA	D. sanguinalis	D. sanguinalis (Admix-E1S)	13	98.3767	98.0056	96.1233	97.74	Clade4
15-37	2015	Hebei, China	36.347	114.623	65	NA	D. sanguinalis	D. sanguinalis var. pubescens	16.04	97.9089	98.18	96.6156	98.17	Clade4
23-3-54	2023	Shandong, China	37.1857	118.493	4	Agricultural	D. sanguinalis	D. sanguinalis (Admix-E12)	18	98.2789	98.2389	96.1544	96.39	Clade3
MT-13-2	2013	Henan, China	33.8371	113.596	78	NA	D. sanguinalis	D. sanguinalis var. pubescens	17	98.5678	98.5956	95.5022	97.48	Clade4
MT-13-20	2013	Shandong, China	36.6857	117.072	37	NA	D. sanguinalis	D. sanguinalis (Admix-E12)	14	97.8089	98.5244	96.4156	97.73	Clade4
15-89	2015	Shanxi, China	34.3489	108.005	563	NA	D. sanguinalis	D. sanguinalis (Admix-E1S)	20	98.5422	98.4511	95.5033	97.68	Clade4
21-23	2021	Henan, China	34.2268	116.162	43	NA	D. sanguinalis	D. sanguinalis var. parvispicula	17	98.2844	98.2156	96.1778	97.13	Clade4
23-1-47	2023	Henan, China	33.8905	110.746	1045	Agricultural	D. sanguinalis	D. sanguinalis (Admix-E1S)	21	97.9422	98.0822	96.4144	98.24	Clade4
13-68	2013	NA	NA	NA	NA	NA	D. sanguinalis	D. sanguinalis var. sanguinalis	19	98.3856	98.27	95.9589	96.7	Clade4
15-107	2015	Henan, China	33.6431	114.708	51	NA	D. sanguinalis	D. sanguinalis (Admix-E1S)	14.29	98.04	97.2444	96.9744	97.62	Clade4
15-61	2015	Shanxi, China	37.3641	112.342	765	NA	D. sanguinalis	D. sanguinalis var. pubescens	15.04	98.3011	97.7922	96.3544	98.33	Clade4
23-3-67	2023	Shandong, China	37.1164	117.168	17	Agricultural	D. sanguinalis	D. sanguinalis (Admix-E12)	14.25	97.8122	98.4133	96.2889	97.34	Clade4
MMT-13-16	2013	Shandong, China	36.2703	120.04	5	NA	D. sanguinalis	D. sanguinalis var. sanguinalis	16	98.0789	98.4244	96.1311	97.41	Clade4
23-1-8-2	2023	Shandong, China	35.3781	116.026	41	Agricultural	D. sanguinalis	D. sanguinalis var. pubescens	14	98.4067	97.1444	96.5367	97.52	Clade4
MMT-13-22	2013	Shanxi, China	37.6928	112.76	827	NA	D. sanguinalis	D. sanguinalis var. pubescens	18.76	98.1111	98.31	96.1111	98.83	Clade4
MT-13-32	2013	Anhui, China	33.9959	115.676	44	NA	D. sanguinalis	D. sanguinalis var. parvispicula	14	98.0422	98.1356	96.2678	97.69	Clade4
W-139	2023	Henan, China	33.1808	114.8	40	NA	D. sanguinalis	D. sanguinalis (Admix-E1S)	14.97	97.8611	97.6378	96.7589	97.99	Clade4
W-8	2023	Ningxia, China	37.46	105.75	1150	Agricultural	D. sanguinalis	D. sanguinalis var. pubescens	13	98.1389	98.4867	96.0211	97.07	Clade1
15-5	2015	Henan, China	34.8297	114.762	66	NA	D. sanguinalis	D. sanguinalis var. pubescens	15.04	97.8989	98.3067	96.3611	97.74	Clade4
23-2-54	2023	Shandong, China	36.9542	116.009	31	Agricultural	D. sanguinalis	D. sanguinalis var. pubescens	18.02	98.1133	98.2944	95.87	98.86	Clade4
23-2-8	2023	Hebei, China	38.0375	116.156	16	Agricultural	D. sanguinalis	D. sanguinalis (Admix-E12)	12	98.1789	98.2933	95.97	97.05	Clade4
23-3-33	2023	Shandong, China	36.6607	119.172	45	Agricultural	D. sanguinalis	D. sanguinalis var. sanguinalis	18	98.03	97.9344	96.4489	97.53	Clade4
23-3-58	2023	Shandong, China	37.7076	118.002	5	Agricultural	D. sanguinalis	D. sanguinalis var. pubescens	24	97.9233	98.2189	96.4244	98	Clade3
HZ2	2023	Zhejiang, China	29.9686	120.236	7	Natural	D. sanguinalis	D. sanguinalis var. parvispicula	11	98.01	97.8933	96.37	98.86	Clade4
13-42	2013	Beijing, China	39.9109	116.413	53	NA	D. sanguinalis	D. sanguinalis var. pubescens	22	98.4789	98.4333	95.5267	98.31	Clade4
15-20	2015	Henan, China	34.7783	111.207	406	NA	D. sanguinalis	D. sanguinalis (Admix-E1S)	20	97.83	98.0067	96.5211	94.77	Clade3
15-51	2015	Shanxi, China	36.0937	111.526	458	NA	D. sanguinalis	D. sanguinalis (Admix-E1S)	24	98.4478	98.5533	95.5689	97.05	Clade4
16-5	2016	Shandong, China	36.5035	116.824	60	NA	D. sanguinalis	D. sanguinalis (Admix-E12)	20.88	97.7533	98.6244	96.0911	98.82	Clade4
23-1-20	2023	Anhui, China	33.2237	115.557	34	Agricultural	D. sanguinalis	D. sanguinalis var. parvispicula	20.73	98.3756	98.2556	95.7078	98.52	Clade4
23-3-26	2023	Shandong, China	35.5635	118.69	138	Agricultural	D. sanguinalis	D. sanguinalis var. sanguinalis	19	98.0878	98.1989	96.2511	97.34	Clade3
23-3-27	2023	Shandong, China	35.6959	118.711	144	Agricultural	D. sanguinalis	D. sanguinalis var. sanguinalis	21.09	97.9578	98.1989	96.4256	98.78	Clade4
W-140	2023	Henan, China	33.1624	114.754	41	NA	D. sanguinalis	D. sanguinalis (Admix-E2S)	18.83	97.82	98.4244	96.0956	97.79	Clade4
23-2-49	2023	Hebei, China	37.1683	115.1	31	Agricultural	D. sanguinalis	D. sanguinalis (Admix-E12)	14.86	98.5333	98.1144	95.7556	98.17	Clade4
RMT-13-3	2016	Henan, China	35.581	114.526	60	NA	D. sanguinalis	D. sanguinalis var. pubescens	19	98.3233	98.4222	95.7856	97.66	Clade4
W-127	2023	Liaoning, China	41.3072	119.942	250	NA	D. sanguinalis	D. sanguinalis var. pubescens	33	98.1689	98.5089	95.6867	98.39	Clade3
W-144	2023	Henan, China	33.2584	114.904	40	NA	D. sanguinalis	D. sanguinalis (Admix-E1S)	10	97.9222	97.61	96.6444	97.41	Clade4
15-98	2015	Shanxi, China	35.1475	111.226	409	NA	D. sanguinalis	D. sanguinalis var. pubescens	14.63	97.7711	98.41	96.1678	97.87	Clade4
23-1-55	2023	Shanxi, China	35.1361	110.448	526	Agricultural	D. sanguinalis	D. sanguinalis var. sanguinalis	19.54	97.9478	97.7244	96.5633	98.5	Clade4
MMT-13-26	2013	Shanxi, China	34.2661	108.207	453	NA	D. sanguinalis	D. sanguinalis (Admix-E1S)	29	98.1889	98.4067	95.6611	96.92	Clade4
MMT-13-15	2013	Shanxi, China	34.3473	108.946	380	NA	D. sanguinalis	D. sanguinalis (Admix-E1S)	20.98	98.0367	98.2556	96.0033	97.36	Clade4
13-54	2013	Shandong, China	36.764	119.65	47	NA	D. sanguinalis	D. sanguinalis var. sanguinalis	11	97.89	97.9256	96.5778	94.15	Clade3
21-20	2021	Jiangsu, China	34.1175	118.81	5	NA	D. sanguinalis	D. sanguinalis (Admix-E2S)	10	98.0767	97.3956	96.91	96.23	Clade3
23-2-31	2023	Shanxi, China	38.7309	112.726	816	Agricultural	D. sanguinalis	D. sanguinalis var. pubescens	26	98.2378	98.5222	95.5989	97.3	Clade4
23-2-46	2023	Hebei, China	37.0836	114.607	50	Agricultural	D. sanguinalis	D. sanguinalis var. pubescens	14	98.49	98.2789	95.5089	97.34	Clade4
15-109	2015	Shanxi, China	34.5718	110.099	348	NA	D. sanguinalis	D. sanguinalis (Admix-E1S)	25	98.4656	98.0289	96.3922	98.27	Clade3
23-1-79	2023	Shandong, China	36.513	116.56	29	Agricultural	D. sanguinalis	D. sanguinalis var. sanguinalis	15.42	98.1678	98.2022	95.8911	95.02	Clade4
23-3-17	2023	Jiangsu, China	34.2272	118.718	6	Agricultural	D. sanguinalis	D. sanguinalis var. sanguinalis	14.79	97.6311	98.2611	96.4822	97.58	Clade4
W-24	2023	Guizhou, China	26.2471	106.35	1026	Agricultural	D. sanguinalis	D. sanguinalis var. parvispicula	17.42	97.9722	98.3222	96.1578	98.32	Clade4
19-02	2019	Shandong, China	36.8516	116.236	30	NA	D. sanguinalis	D. sanguinalis var. pubescens	22	97.6911	98.5722	95.9767	98.15	Clade4
MT-13-13	2013	Shandong, China	35.7962	118.635	144	NA	D. sanguinalis	D. sanguinalis var. sanguinalis	14	98.2322	98.1456	96.1156	96.88	Clade4
15-57	2015	Shandong, China	35.6925	118.906	120	NA	D. sanguinalis	D. sanguinalis var. sanguinalis	14.97	97.71	98.2467	96.4444	98.41	Clade4
23-2-52	2023	Shandong, China	36.8542	115.723	37	Agricultural	D. sanguinalis	D. sanguinalis (Admix-E1S)	19	97.9433	98.3478	95.9122	96.71	Clade4
15-35	2015	Henan, China	34.2189	116.082	39	NA	D. sanguinalis	D. sanguinalis var. pubescens	22	98.0644	97.6433	96.5267	97.96	Clade4
15-44	2015	Shanxi, China	34.3689	107.245	635	NA	D. sanguinalis	D. sanguinalis (Admix-E1S)	13	98.4622	98.3656	95.3122	97.67	Clade3
21-28	2021	Jiangsu, China	32.5207	119.62	5	NA	D. sanguinalis	D. sanguinalis (Admix-E2S)	17.44	98.0344	98.1789	95.9533	98.52	Clade4
23-3-43	2023	Shandong, China	36.894	120.525	67	Agricultural	D. sanguinalis	D. sanguinalis var. sanguinalis	16	97.9944	98.0911	96.2711	97.63	Clade4
MT-13-28	2013	Henan, China	35.4873	114.099	73	NA	D. sanguinalis	D. sanguinalis (Admix-E12)	12	97.9478	98.4367	95.6167	97.55	Clade4
15-18	2015	Jiangsu, China	33.6382	119.041	12	NA	D. sanguinalis	D. sanguinalis (Admix-E2S)	18	97.7144	98.1822	96.3667	97.7	Clade4
21-30	2021	Jilin, China	44.6312	125.694	178	Disturbed	D. sanguinalis	D. sanguinalis var. glabra	16	97.8411	98.4356	95.94	95.84	Clade3
23-2-17	2023	Hebei, China	39.419	115.951	40	Agricultural	D. sanguinalis	D. sanguinalis (Admix-E12)	19	98.2278	98.1133	95.7756	96.83	Clade4
23-2-20	2023	Hebei, China	39.3837	115.418	80	Agricultural	D. sanguinalis	D. sanguinalis var. pubescens	15.3	98.1189	97.8744	96.2789	97.7	Clade4
23-2-57	2023	Shandong, China	36.9329	116.253	29	Agricultural	D. sanguinalis	D. sanguinalis var. pubescens	17	98.0389	98.2667	96.0122	97.67	Clade4
W-76	2023	Jilin, China	43.1749	128.28	630	NA	D. sanguinalis	D. sanguinalis var. parvispicula	16.98	98.0867	97.8956	95.8944	98.82	Clade4
15-1	2015	Shanxi, China	36.5746	111.762	596	NA	D. sanguinalis	D. sanguinalis var. pubescens	13	98.0878	98.5411	95.5422	97.97	Clade4
23-3-40	2023	Shandong, China	37.0588	119.944	84	Agricultural	D. sanguinalis	D. sanguinalis var. sanguinalis	10	98.1722	98.0189	95.9444	97.86	Clade4
23-1-62-2	2023	Shanxi, China	35.6896	112.179	871	Agricultural	D. sanguinalis	D. sanguinalis (Admix-E2S)	18	98.4178	97.5711	96.1111	97.65	Clade4
WH2	2023	Anhui, China	31.1514	117.914	5	Natural	D. sanguinalis	D. sanguinalis var. parvispicula	18	98.4044	98.24	95.4556	97.43	Clade4
15-65	2015	Tianjin, China	39.337	117.832	5	NA	D. sanguinalis	D. sanguinalis var. pubescens	14.95	97.8056	98.0422	96.0711	98.45	Clade4
23-1-19	2023	Anhui, China	33.2554	115.601	35	Agricultural	D. sanguinalis	D. sanguinalis var. parvispicula	14.74	97.9278	98.1278	95.88	98.41	Clade4
23-3-24	2023	Shandong, China	34.9376	118.7	125	Agricultural	D. sanguinalis	D. sanguinalis var. sanguinalis	11	97.6289	97.9322	96.5567	97.61	Clade4
MT-13-3	2013	Shanxi, China	32.6905	109.036	265	NA	D. sanguinalis	D. sanguinalis var. parvispicula	28.25	98.0044	98.1389	95.8133	98.65	Clade4
SX13	2023	Zhejiang, China	30.0164	120.616	12	Disturbed	D. sanguinalis	D. sanguinalis var. parvispicula	15	98.4867	97.7267	95.6244	97.77	Clade4
WH1	2023	Anhui, China	31.1514	117.914	5	Natural	Outlier	Outlier	16	98.2156	98.1044	95.6722	68.13	NA
15-4	2015	Shandong, China	36.6855	117.533	114	NA	D. sanguinalis	D. sanguinalis var. pubescens	14	98.1711	98.4811	95.43	97.44	Clade3
15-58	2015	Shandong, China	35.3089	117.009	98	NA	D. sanguinalis	D. sanguinalis var. sanguinalis	14.51	98.0411	97.5433	96.21	98.38	Clade4
GY3	2023	Guizhou, China	25.5668	104.629	1852	Natural	D. sanguinalis	D. sanguinalis var. parvispicula	17	97.7378	98.0844	95.9744	98.97	Clade4
SZ3	2023	Jiangsu, China	31.3321	120.718	1	Disturbed	D. sanguinalis	D. sanguinalis var. parvispicula	16	97.7322	97.9033	96.2856	98.32	Clade4
15-110	2015	Shandong, China	35.5044	116.76	40	NA	D. sanguinalis	D. sanguinalis var. parvispicula	15.03	98.3156	97.9056	96.0733	98.24	Clade3
15-47	2015	Shanxi, China	34.115	108.611	413	NA	D. sanguinalis	D. sanguinalis (Admix-E1S)	15.11	97.73	97.9389	96.0578	98.02	Clade4
15-99	2015	Shanxi, China	34.3148	108.256	475	NA	D. sanguinalis	D. sanguinalis (Admix-E1S)	17.97	97.51	98.5089	95.8911	97.97	Clade4
23-1-37	2023	Henan, China	33.6729	113.118	107	Agricultural	D. sanguinalis	D. sanguinalis (Admix-E2S)	10	97.5733	98.0078	96.1344	97.63	Clade4
23-2-23	2023	Shanxi, China	39.3223	114.377	879	Agricultural	D. sanguinalis	D. sanguinalis (Admix-E12)	17.04	97.54	98.4778	96.12	98.22	Clade4
23-3-56	2023	Shandong, China	37.4959	118.262	11	Agricultural	D. sanguinalis	D. sanguinalis var. pubescens	20	97.6656	98.0311	96.1844	98.66	Clade4
MT-13-8	2013	Henan, China	32.9721	114.784	39	NA	D. sanguinalis	D. sanguinalis (Admix-E1S)	15	97.0122	98.1278	96.6367	97.5	Clade4
SX14	2023	Zhejiang, China	30.0886	120.483	6	Disturbed	D. sanguinalis	D. sanguinalis var. parvispicula	13	97.7333	98.3133	95.8744	98.54	Clade4
15-123	2015	Shandong, China	36.1933	117.049	153	NA	D. sanguinalis	D. sanguinalis var. sanguinalis	14.78	97.8389	97.9622	96.1044	97.76	Clade4
23-1-69	2023	Henan, China	35.8468	115.016	56	Agricultural	D. sanguinalis	D. sanguinalis (Admix-E12)	11	98.0067	98.4256	95.52	97.61	Clade4
23-3-53	2023	Shandong, China	37.1176	118.651	7	Agricultural	D. sanguinalis	D. sanguinalis var. sanguinalis	10	97.8078	97.7311	96.3389	98.38	Clade4
MT-13-23	2013	Henan, China	33.6052	114.347	48	NA	D. sanguinalis	D. sanguinalis (Admix-E1S)	15	97.8867	98.2533	95.8244	97.16	Clade4
15-80	2015	Shandong, China	36.8516	116.236	30	NA	D. sanguinalis	D. sanguinalis var. pubescens	17	97.8356	98.1233	95.8989	98.19	Clade4
21-22	2021	Henan, China	34.9284	114.916	70	NA	D. sanguinalis	D. sanguinalis (Admix-E12)	25	97.5478	98.0578	96.3322	98.35	Clade4
23-1-27	2023	Henan, China	33.2245	114.407	50	Agricultural	D. sanguinalis	D. sanguinalis (Admix-E2S)	22	97.9244	97.8967	96.0589	98.33	Clade4
HZ8	2023	Zhejiang, China	30.1708	120.286	13	Natural	D. sanguinalis	D. sanguinalis var. parvispicula	14	98.2467	97.5344	96.2556	98.85	Clade4
MT-13-10	2013	Jiangsu, China	34.4272	119.4	1	NA	D. sanguinalis	D. sanguinalis (Admix-E2S)	15	98.0922	97.2156	96.4878	97.4	Clade4
SZ2	2023	Jiangsu, China	31.43	120.795	1	Disturbed	D. sanguinalis	D. sanguinalis var. parvispicula	15	98.1611	98.1878	95.5022	98.4	Clade4
15-117	2015	Hebei, China	38.0469	115.99	19	NA	D. sanguinalis	D. sanguinalis var. pubescens	18.48	97.9467	98.1756	95.83	98.62	Clade4
23-1-49	2023	Shanxi, China	34.5081	110.32	530	Agricultural	D. sanguinalis	D. sanguinalis var. parvispicula	14	98.1156	98.3667	95.6467	97.37	Clade3
MMT-13-31	2013	Shandong, China	36.1909	118.177	283	NA	D. sanguinalis	D. sanguinalis var. pubescens	20.7	96.8733	98.6644	96.2	98.91	Clade4
W-7	2023	Ningxia, China	37.0464	105.89	1312	Agricultural	D. sanguinalis	D. sanguinalis var. glabra	13	98.2256	98.0778	95.5122	97.44	Clade4
W-7-2	2023	Ningxia, China	37.0464	105.89	1312	Agricultural	D. sanguinalis	D. sanguinalis var. glabra	21	98.2278	98.0822	95.4922	97.28	Clade2
W-1	2023	Jiangsu, China	32.3329	119.382	5.74	Agricultural	D. sanguinalis	D. sanguinalis (Admix-E2S)	12	98.26	97.58	96.13	96.15	Clade4
15-28	2015	Shanxi, China	34.6231	108.947	421	NA	D. sanguinalis	D. sanguinalis (Admix-E1S)	29	98.1944	98.2033	95.3256	97.51	Clade4
W-105	2023	Hubei, China	30.6652	113.097	33	NA	D. sanguinalis	D. sanguinalis var. parvispicula	19	98.0211	98.3311	95.4633	97.22	Clade3
15-14	2015	Shanxi, China	34.5057	109.517	346	NA	D. sanguinalis	D. sanguinalis (Admix-E1S)	15.08	98.0367	98.2256	95.5311	98	Clade4
23-1-51	2023	Shanxi, China	34.6732	109.96	338	Agricultural	D. sanguinalis	D. sanguinalis (Admix-E1S)	10	97.9156	98.2356	95.6222	97.7	Clade4
MMT-13-4	2013	Shandong, China	36.1994	117.141	150	NA	D. sanguinalis	D. sanguinalis var. sanguinalis	14	97.8556	98.0711	95.7378	97.58	Clade4
23-3-66	2023	Shandong, China	37.2359	117.185	16	Agricultural	D. sanguinalis	D. sanguinalis var. sanguinalis	10	97.6422	97.8467	96.4478	97.48	Clade4
23-3-60	2023	Shandong, China	37.766	117.579	8	Agricultural	D. sanguinalis	D. sanguinalis var. pubescens	21	98.0022	98.1033	95.82	98.19	Clade3
15-33	2015	Shanxi, China	34.5187	109.778	356	NA	D. sanguinalis	D. sanguinalis (Admix-E1S)	13	98.0856	98.0089	95.7644	97.47	Clade3
MT-13-27	2013	Henan, China	33.8379	113.593	75	NA	D. sanguinalis	D. sanguinalis var. parvispicula	10	97.6678	98.0811	96.27	97.75	Clade4
W-11	2023	Hubei, China	30.2029	112.121	45	Natural	D. sanguinalis	D. sanguinalis var. parvispicula	15.17	97.9678	98.2978	95.66	97.82	Clade3
15-30	2015	Shandong, China	36.2517	117.45	161	NA	D. sanguinalis	D. sanguinalis var. sanguinalis	11	97.7478	97.7378	96.2044	98.09	Clade4
23-1-73	2023	Shandong, China	36.1208	115.798	42	Agricultural	D. sanguinalis	D. sanguinalis (Admix-E12)	11	97.7044	98.0833	95.8644	97.55	Clade3
23-3-10	2023	Jiangsu, China	34.455	117.544	61	Agricultural	D. sanguinalis	D. sanguinalis var. sanguinalis	17.89	97.6989	97.9733	95.8844	98.85	Clade4
23-3-21	2023	Jiangsu, China	34.837	119.079	6	Agricultural	D. sanguinalis	D. sanguinalis var. sanguinalis	15	97.6356	97.6689	96.2378	98.2	Clade4
W-117	2023	Guangdong, China	22.3998	113.807	0	NA	D. sanguinalis	D. sanguinalis var. parvispicula	17.57	97.9222	98.3178	95.3344	97.9	Clade4
XT1	2023	Hubei, China	30.36	113.47	29	NA	D. sanguinalis	D. sanguinalis var. parvispicula	15.56	97.7778	97.7444	96.0433	97.52	Clade4
13-39	2013	Shandong, China	37.7053	118.105	6	NA	D. sanguinalis	D. sanguinalis var. pubescens	23	97.3978	98.4233	96.0078	97.62	Clade4
23-2-30	2023	Shanxi, China	38.7365	112.717	822	Agricultural	D. sanguinalis	D. sanguinalis var. pubescens	25	97.4178	98.3756	95.8667	97.73	Clade4
SX1	2023	Zhejiang, China	29.71	120.194	12	Natural	D. sanguinalis	D. sanguinalis var. parvispicula	17	97.7222	98.1856	95.5367	97.55	Clade4
W-73	2023	Heilongjiang, China	45.3731	126.583	143.66	Natural	D. sanguinalis	D. sanguinalis var. glabra	12	98.0389	97.95	95.7522	97.66	Clade3
W-90	2023	Heilongjiang, China	45.1039	126.105	138	NA	D. sanguinalis	D. sanguinalis var. glabra	10	98.1889	98.0089	95.5	97.44	Clade3
23-1-83	2023	Anhui, China	33.6461	116.983	28	Agricultural	D. sanguinalis	D. sanguinalis var. parvispicula	19.31	97.6956	97.6433	96.3789	95.74	Clade4
SX4	2023	Zhejiang, China	29.5828	120.793	19	Disturbed	D. sanguinalis	D. sanguinalis var. parvispicula	19	97.5722	98.2133	95.7678	97.31	Clade4
W-71	2023	Heilongjiang, China	47.2377	132.048	77.4	Natural	D. sanguinalis	D. sanguinalis var. glabra	21.45	98.0367	97.9789	95.5833	95.98	Clade4
W-99	2023	Heilongjiang, China	45.5014	128.471	116.3	NA	D. sanguinalis	D. sanguinalis var. glabra	20	97.94	98.27	95.4244	97.31	Clade3
23-3-1	2023	Shandong, China	35.7695	117.51	160	Agricultural	D. sanguinalis	D. sanguinalis var. sanguinalis	14	98.0278	97.9544	95.59	97.5	Clade4
W-91	2023	Jilin, China	45.1644	124.385	134	NA	D. sanguinalis	D. sanguinalis var. glabra	21	98.1467	98.1311	95.3344	97.79	Clade3
23-3-13	2023	Jiangsu, China	33.9965	117.76	24	Agricultural	D. sanguinalis	D. sanguinalis var. parvispicula	16.72	97.8767	98.1533	95.38	97.82	Clade4
23-3-2	2023	Shandong, China	35.6706	117.257	100	Agricultural	D. sanguinalis	D. sanguinalis var. sanguinalis	15	97.9878	97.9889	95.7533	97.43	Clade4
MT-13-33	2013	Henan, China	34.5032	113.805	156	NA	D. sanguinalis	D. sanguinalis (Admix-E2S)	18	97.8189	98.4589	95.8689	97.22	Clade3
15-69	2015	Shandong, China	35.4044	115.93	43	NA	D. sanguinalis	D. sanguinalis (Admix-E12)	23	98.1244	97.5233	95.6933	98.04	Clade4
23-2-33	2023	Shanxi, China	38.0646	112.679	900	Agricultural	D. sanguinalis	D. sanguinalis var. pubescens	16	98.0833	98.1689	95.3667	98.2	Clade3
W-63	2023	Heilongjiang, China	44.5454	129.413	279	Natural	D. sanguinalis	D. sanguinalis var. glabra	15	98.1122	98.3844	95.0333	98.34	Clade4
W-97	2023	Fujian, China	26.9715	118.978	807	NA	D. sanguinalis	D. sanguinalis (Admix-E2S)	16.13	98.2189	97.2678	96.2578	98.43	Clade3
13-45	2013	Shandong, China	35.322	115.947	43	NA	D. sanguinalis	D. sanguinalis (Admix-E2S)	15	97.6389	97.8922	95.8722	97.13	Clade3
23-2-43	2023	Hebei, China	36.5606	114.273	206	Agricultural	D. sanguinalis	D. sanguinalis var. pubescens	12	97.0911	97.6789	96.7144	96.94	Clade3
W-115	2023	Guangxi, China	23.1188	107.99	88	NA	D. sanguinalis	D. sanguinalis var. parvispicula	15	98.0233	98.0078	95.5144	97.67	Clade4
W-130	2023	Liaoning, China	42.4188	122.818	103	NA	D. sanguinalis	D. sanguinalis var. glabra	13	97.96	98.0311	95.5144	97.4	Clade4
W-58	2023	Henan, China	33.468	113.644	87	Agricultural	D. sanguinalis	D. sanguinalis (Admix-E2S)	18	97.5844	98.0222	95.8033	97.31	Clade4
W-9	2023	Hubei, China	30.2339	114.394	9.5	Natural	D. sanguinalis	D. sanguinalis var. parvispicula	16	97.7644	97.5667	95.8656	97.42	Clade4
13-60	2013	Shandong, China	36.5191	118.549	95	NA	D. sanguinalis	D. sanguinalis var. sanguinalis	11	97.4633	97.9644	96.0122	97.65	Clade4
23-1-40	2023	Henan, China	34.0809	112.277	475	Natural	D. sanguinalis	D. sanguinalis (Admix-E2S)	10	97.2267	97.8356	96.3144	97.44	Clade4
23-1-5	2023	Shandong, China	35.6696	116.067	38	Agricultural	D. sanguinalis	D. sanguinalis var. glabra	28	98.3589	97.6911	95.2078	97.12	Clade4
13-37	2013	Henan, China	34.8622	114.825	73	NA	D. sanguinalis	D. sanguinalis (Admix-E12)	12	97.9211	97.9333	95.4878	97.81	Clade4
23-3-15	2023	Jiangsu, China	33.8303	118.484	16	Agricultural	D. sanguinalis	D. sanguinalis var. parvispicula	13	97.48	98.2422	95.3856	97.82	Clade4
W-48	2023	Sichuan, China	31.0427	104.235	485	Agricultural	D. sanguinalis	D. sanguinalis var. parvispicula	14.55	97.9478	98.22	94.9767	98.21	Clade4
23-3-37	2023	Shandong, China	37.0123	119.912	83	Agricultural	D. sanguinalis	D. sanguinalis var. sanguinalis	15.89	97.7178	97.8744	95.6733	98.01	Clade4
MT-13-6	2013	Shanxi, China	34.2804	107.756	488	NA	D. sanguinalis	D. sanguinalis (Admix-E1S)	14	98.1967	98.2122	95.2056	95.98	Clade3
23-1-54	2023	Shanxi, China	34.5057	109.517	346	Agricultural	D. sanguinalis	D. sanguinalis (Admix-E1S)	17	97.3433	97.96	96.0111	97.14	Clade4
W-17	2023	Gansu, China	35.3042	106.561	1465	Agricultural	D. sanguinalis	D. sanguinalis (Admix-E1S)	19.53	97.0644	98.3133	95.8367	96.13	Clade4
W-4-2	2023	Ningxia, China	38.26	106.03	1073	Agricultural	D. sanguinalis	D. sanguinalis var. glabra	22	98.0511	97.8478	95.2489	98.28	Clade4
15-72	2015	Hebei, China	38.5222	114.996	57	NA	D. sanguinalis	D. sanguinalis (Admix-E12)	25	97.5756	98.0322	95.58	98.29	Clade4
23-1-48	2023	Shanxi, China	34.0123	110.409	876	Agricultural	D. sanguinalis	D. sanguinalis (Admix-E1S)	15.46	97.5922	98.0211	95.6678	98.29	Clade4
23-1-75	2023	Shandong, China	36.2227	116.14	39	Agricultural	D. sanguinalis	D. sanguinalis var. pubescens	18	97.3489	97.57	96.1411	97.95	Clade4
MT-13-9	2013	Jiangsu, China	34.6012	118.492	55	NA	D. sanguinalis	D. sanguinalis var. sanguinalis	11	97.6344	97.3989	96.0478	97.64	Clade4
W-17-2	2023	Gansu, China	35.3042	106.561	1465	Agricultural	D. sanguinalis	D. sanguinalis (Admix-E1S)	12	97.1933	98.3767	95.6678	95.7	Clade4
GY5	2023	Guizhou, China	25.5213	104.604	1626	Natural	D. sanguinalis	D. sanguinalis var. parvispicula	18	98.0289	98.1956	94.8744	99.07	Clade4
W-85	2023	Jilin, China	43.2	124.85	232	NA	D. sanguinalis	D. sanguinalis var. glabra	15.11	97.8178	98.0233	95.3667	97.96	Clade4
23-3-34	2023	Shandong, China	36.9259	119.402	11	Agricultural	D. sanguinalis	D. sanguinalis var. sanguinalis	22	98.1256	97.9011	95.2044	97.82	Clade4
23-3-62	2023	Shandong, China	37.7549	117.42	10	Agricultural	D. sanguinalis	D. sanguinalis var. pubescens	11	97.7367	97.3311	96.0856	96.69	Clade4
13-36	2013	Hebei, China	36.554	115.289	45	NA	D. sanguinalis	D. sanguinalis (Admix-E2S)	12	97.47	97.12	96.4467	97.91	Clade4
23-3-6	2023	Shandong, China	35.163	117.18	79	Agricultural	D. sanguinalis	D. sanguinalis (Admix-E2S)	12	97.8644	97.5367	95.7922	97.16	Clade4
QZ1	2023	Zhejiang, China	28.5939	118.592	148	Natural	D. sanguinalis	D. sanguinalis var. parvispicula	12	97.5933	98.1989	95.2289	98.35	Clade4
W-62	2023	Heilongjiang, China	44.565	129.499	282.1	Agricultural	D. sanguinalis	D. sanguinalis var. glabra	26	97.6756	98.1089	95.4367	97.47	Clade4
W-10	2023	Hubei, China	30.2856	114.184	3.4	Agricultural	D. sanguinalis	D. sanguinalis var. parvispicula	13	97.6367	97.7811	95.3922	95.47	Clade3
23-1-58	2023	Shanxi, China	35.4328	111.323	491	Natural	D. sanguinalis	D. sanguinalis (Admix-E12)	19.81	97.1089	98.3189	95.7856	98.25	Clade4
W-45	2023	Sichuan, China	29.8904	103.856	390	Agricultural	D. sanguinalis	D. sanguinalis var. parvispicula	17.21	97.8867	98.0856	95.8522	97.38	Clade3
15-121	2015	Shanxi, China	34.3055	108.496	431	NA	D. sanguinalis	D. sanguinalis (Admix-E1S)	14.88	97.0667	98.1178	95.7111	98.4	Clade2
W-47	2023	Sichuan, China	28.5629	105.129	328	Agricultural	D. sanguinalis	D. sanguinalis var. parvispicula	15.58	97.9867	97.3811	95.5533	98.19	Clade4
23-1-10	2023	Shandong, China	34.7361	116.149	41	Agricultural	D. sanguinalis	D. sanguinalis (Admix-E2S)	17	97.4767	97.3111	96.1644	97.54	Clade4
23-3-25	2023	Shandong, China	35.5039	118.661	121	Agricultural	D. sanguinalis	D. sanguinalis var. sanguinalis	18	97.8356	97.4811	95.6789	97.19	Clade4
W-75	2023	Heilongjiang, China	45.4229	126.531	133.7	Natural	D. sanguinalis	D. sanguinalis var. glabra	15.19	97.9411	98.2933	94.7544	98.08	Clade4
W-20	2023	Gansu, China	35.175	107.312	1332.2	Agricultural	D. sanguinalis	D. sanguinalis (Admix-E1S)	15.12	98.1511	98.0944	94.6389	97.64	Clade4
W-67	2023	Heilongjiang, China	46.8212	127.094	166.1	Natural	D. sanguinalis	D. sanguinalis var. glabra	14	97.8944	97.9422	95.11	97.15	Clade3
YZGJ3	2023	Jiangsu, China	31.8496	119.404	2	Disturbed	D. sanguinalis	D. sanguinalis var. parvispicula	13	98.0044	97.5389	95.4822	99.19	Clade4
W-87	2023	Jilin, China	45.1944	122.486	155	NA	D. sanguinalis	D. sanguinalis var. glabra	12	97.6011	97.9956	95.2511	97.24	Clade4
15-115	2015	Hebei, China	38.7109	116.66	5	NA	D. sanguinalis	D. sanguinalis var. pubescens	15	97.7956	97.8978	95.1522	98.51	Clade4
W-104	2023	Hunan, China	28.7023	112.483	27	NA	D. sanguinalis	D. sanguinalis var. parvispicula	10	97.6389	97.7178	95.45	97.56	Clade4
23-2-36	2023	Shanxi, China	37.0834	112.992	1043	Agricultural	D. sanguinalis	D. sanguinalis var. pubescens	15	96.7544	97.6822	96.5278	97.56	Clade4
23-3-65	2023	Shandong, China	37.4741	117.143	13	Agricultural	D. sanguinalis	D. sanguinalis var. sanguinalis	10	97.3656	98.2267	95.4344	97.47	Clade4
15-64	2015	Henan, China	33.8379	113.593	75	NA	D. sanguinalis	D. sanguinalis var. parvispicula	24	97.7878	97.5311	95.2989	97.99	Clade4
W-129	2023	Liaoning, China	42.5457	122.496	124	NA	D. sanguinalis	D. sanguinalis var. glabra	15.6	97.7667	97.8589	95.2744	97.99	Clade4
23-2-31-2	2023	Shanxi, China	38.7309	112.726	816	Natural	D. sanguinalis	D. sanguinalis var. pubescens	23	97.8167	97.6956	95.0822	96.88	Clade4
W-98	2023	Heilongjiang, China	45.4757	128.514	152.7	NA	D. sanguinalis	D. sanguinalis var. glabra	16.26	98.1367	97.47	94.9322	97.83	Clade4
SX9	2023	Zhejiang, China	30.8328	120.067	3	Disturbed	D. sanguinalis	D. sanguinalis var. parvispicula	15	98.0644	96.6722	95.9867	95.78	Clade3
W-4	2023	Ningxia, China	38.26	106.03	1073	Agricultural	D. sanguinalis	D. sanguinalis var. glabra	10	97.9156	97.7489	94.8911	97.27	Clade4
W-79	2023	Jilin, China	43.4433	126.332	479	NA	D. sanguinalis	D. sanguinalis var. pubescens	17	97.7056	97.9967	94.8756	98.33	Clade3
W-81	2023	Jilin, China	43.3213	124.49	182	NA	D. sanguinalis	D. sanguinalis var. glabra	17	97.9844	97.9567	94.7678	97.12	Clade4
DZ2-1	2023	Hainan, China	19.58	109.5	55	NA	D. sanguinalis	D. sanguinalis var. parvispicula	26	96.9033	97.7333	95.8122	98.33	Clade4
SZHS1	2023	Anhui, China	33.3904	117.901	20	Natural	D. sanguinalis	D. sanguinalis var. parvispicula	16	98.3233	96.4511	96.4333	97.78	Clade3
23-3-47	2023	Shandong, China	36.4686	119.759	14	Agricultural	D. sanguinalis	D. sanguinalis (Admix-E12)	28	98.1722	95.9778	96.2467	97.32	Clade4
W-64	2023	Heilongjiang, China	44.5422	129.437	267.9	Natural	D. sanguinalis	D. sanguinalis var. glabra	15	97.8367	98.2078	94.4867	97.48	Clade4
W-50	2023	Sichuan, China	30.7715	105.623	349	Agricultural	D. sanguinalis	D. sanguinalis var. parvispicula	18	97.6511	98.06	94.9144	97.68	Clade4
W-78	2023	Jilin, China	45.2211	124.67	129	NA	D. sanguinalis	D. sanguinalis var. glabra	14	97.7144	97.97	94.7467	97.38	Clade4
LS1	2023	Hainan, China	18.52	110.04	7	NA	D. sanguinalis	D. sanguinalis var. parvispicula	15	97.2811	96.9678	96.08	96.7	Clade4
W-69	2023	Heilongjiang, China	47.198	131.996	74.1	Natural	D. sanguinalis	D. sanguinalis var. glabra	14	97.7233	98.0956	94.5211	97.22	Clade4
DZ1	2023	Hainan, China	19.74	109.36	8	NA	D. sanguinalis	D. sanguinalis var. parvispicula	28	96.7378	97.2744	96.0544	96.7	Clade4
W-84	2023	Jilin, China	44.5834	126.2	159	NA	D. sanguinalis	D. sanguinalis var. glabra	23	97.6178	97.9567	94.9044	97.5	Clade4
SX8	2023	Zhejiang, China	30.1078	120.569	11	Agricultural	D. sanguinalis	D. sanguinalis var. parvispicula	19	97.8567	96.8389	95.7267	99.07	Clade3
W-92	2023	Jilin, China	44.5213	123.596	143	NA	D. sanguinalis	D. sanguinalis var. glabra	14.74	96.7989	98.0522	95.3656	97.81	Clade4
W-113	2023	Guangxi, China	22.2419	107.174	198	NA	D. sanguinalis	D. sanguinalis var. parvispicula	21	97.9222	96.2122	96.1433	97.74	Clade4
W-116	2023	Guangxi, China	22.99	108.155	107	NA	D. sanguinalis	D. sanguinalis var. parvispicula	18	97.3	96.57	95.9811	94.89	Clade4
W-60	2023	Shandong, China	36.1233	115.62	44	Agricultural	D. sanguinalis	D. sanguinalis var. pubescens	12	97.6944	97.6711	94.9289	95.83	Clade2
SZ1	2023	Jiangsu, China	31.3241	120.726	6	Disturbed	D. sanguinalis	D. sanguinalis var. parvispicula	20	98.1911	96.3344	96.2833	98.38	Clade3
MT-13-31	2013	Hebei, China	38.0483	114.522	78	NA	D. sanguinalis	D. sanguinalis (Admix-E12)	98	98.0389	98.0233	94.1967	97.05	Clade3
W-19	2023	Gansu, China	35.2216	106.592	1470.6	Agricultural	D. sanguinalis	D. sanguinalis (Admix-E1S)	10	97.0889	97.9778	95.1644	97.65	Clade2
23-2-10	2023	Hebei, China	38.1961	116.134	16	Agricultural	D. sanguinalis	D. sanguinalis var. pubescens	18	97.9022	97.1856	95.1411	95.71	Clade4
W-13	2023	Gansu, China	36.69	103.41	1559.7	Agricultural	D. sanguinalis	D. sanguinalis (Admix-E1S)	12	96.9622	97.7878	95.0656	97.3	Clade4
W-74	2023	Heilongjiang, China	45.5414	126.975	143	Natural	D. sanguinalis	D. sanguinalis var. glabra	15	97.8978	97.7922	94.3567	96.6	Clade4
YZ3	2023	Hainan, China	18.2989	109.718	14	Natural	D. sanguinalis	D. sanguinalis var. parvispicula	21	98.1889	96.1567	95.6422	98.76	Clade4
QZ3	2023	Zhejiang, China	29.1373	119.034	119	Natural	D. sanguinalis	D. sanguinalis var. parvispicula	15	98.0244	96.7578	95.1511	99	Clade4
23-3-42	2023	Shandong, China	37.3611	120.441	69	Agricultural	D. sanguinalis	D. sanguinalis var. sanguinalis	16	97.2944	97.2256	95.2078	96.66	Clade4
W-22	2023	Yunnan, China	25.4098	103.571	2005.96	Agricultural	D. sanguinalis	D. sanguinalis var. parvispicula	22	97.7789	97.7478	94.81	98.19	Clade3
YZ6	2023	Hainan, China	18.38	109.2	33	Agricultural	D. sanguinalis	D. sanguinalis var. parvispicula	17.55	97.13	96.5511	95.8289	95.22	Clade4
W-65	2023	Heilongjiang, China	47.2725	123.694	305	Agricultural	D. sanguinalis	D. sanguinalis var. glabra	12	97.4811	97.9156	94.2133	97.74	Clade4
YC1	2023	Jiangsu, China	33.4761	119.793	4	Natural	Outlier	Outlier	16	97.35	97.4967	94.67	57.53	NA
W-125	2023	Guangdong, China	23.4809	113.349	25	NA	D. sanguinalis	D. sanguinalis var. parvispicula	13	97.7811	95.8578	95.7644	96.06	Clade4
W-107	2023	Guangxi, China	22.4205	107.312	109	NA	D. sanguinalis	D. sanguinalis var. parvispicula	19.87	97.4322	96.2289	95.3811	98.45	Clade4
MMT-13-10	2013	Shanxi, China	35.0327	111.013	375	NA	D. sanguinalis	D. sanguinalis (Admix-C4)	17	96.6444	96.0722	96.1833	96.27	Clade3
TL1	2023	Liaoning, China	42.22	123.73	60	NA	D. sanguinalis	D. sanguinalis var. glabra	13	97.3456	97.6267	94.2078	97.43	Clade4
23-1-84	2023	Jiangxi, China	28.3991	115.476	37	Agricultural	D. sanguinalis	D. sanguinalis var. parvispicula	11	97.77	96.0189	95.5378	96.8	Clade4
23-1-11	2023	Anhui, China	34.5353	116.335	53	Agricultural	D. sanguinalis	D. sanguinalis var. sanguinalis	19	96.6744	97.5833	94.7433	97.17	Clade4
DF1	2023	Hainan, China	19.12	108.69	20	NA	D. sanguinalis	D. sanguinalis var. parvispicula	19	96.73	96.2567	95.4033	97.1	Clade4
W-102	2023	Hainan, China	19.859	110.37	39	NA	Outlier	Outlier	15.76	96.6733	95.55	95.9167	94.67	NA
23-2-13	2023	Hebei, China	38.1867	114.997	44	Agricultural	D. sanguinalis	D. sanguinalis (Admix-C4)	11	97.0633	95.7522	95.2611	96.36	Clade3
W-100-2	2023	Heilongjiang, China	45.491	128.476	114.9	Agricultural	D. sanguinalis	D. sanguinalis var. glabra	13	95.71	97.9178	94.2211	97.46	Clade4
W-110	2023	Guangxi, China	24.005	109.541	91	NA	D. sanguinalis	D. sanguinalis (Admix-C4)	15.05	97.4722	94.6067	94.4267	96.57	Clade4
W-16-2	2023	Gansu, China	34.4546	105.173	1264.7	NA	D. sanguinalis	D. sanguinalis (Admix-E1S)	19	96.0522	97.5767	93.6767	97.73	Clade3
MT-13-19	2013	Henan, China	34.6243	112.459	144	NA	D. sanguinalis	D. sanguinalis (Admix-E2S)	26	98.3344	89.2444	96.7656	97.58	Clade4
W-66	2023	Heilongjiang, China	46.456	123.437	163	Agricultural	D. sanguinalis	D. sanguinalis var. glabra	19	96.62	97.1022	92.9889	97.28	Clade4
AHCZ2	2023	Anhui, China	32.53	117.7	75	NA	D. sanguinalis	D. sanguinalis (Admix-E2S)	21.1	98.0589	88.8578	96.5467	98	Clade4
21-8	2021	Shandong, China	35.6524	117.999	211	NA	D. sanguinalis	D. sanguinalis (Admix-C4)	11	96.8856	93.2189	93.4844	94.29	Clade3
W-70	2023	Heilongjiang, China	46.8451	127.048	170.9	Natural	D. sanguinalis	D. sanguinalis var. glabra	17	97.5978	88.8067	94.7367	96.87	Clade3
W-132	2023	Liaoning, China	42.6174	122.207	135	NA	D. sanguinalis	D. sanguinalis (Admix-C4)	28.19	96.85	90.6267	92.4144	96.6	Clade4
MMT-13-29	2013	Henan, China	33.2605	113.019	152	NA	D. sanguinalis	D. sanguinalis (Admix-C4)	13	96.8022	92.2022	91.1722	95.69	Clade4
23-3-68	2023	Shandong, China	37.0064	117.147	20	Agricultural	D. sanguinalis	D. sanguinalis (Admix-C4)	14	96.6522	90.2311	92.6889	93.14	Clade3
23-3-35	2023	Shandong, China	36.7735	119.911	40	Agricultural	D. sanguinalis	D. sanguinalis (Admix-C4)	21.13	96.9756	89.4078	92.6389	97.07	Clade3
23-1-62	2023	Shanxi, China	35.6896	112.179	871	Agricultural	D. sanguinalis	D. sanguinalis (Admix-C4)	17	95.1767	90.9389	89.31	94.25	Clade3
23-3-49	2023	Shandong, China	36.8143	119.406	9	Agricultural	D. ciliaris	D. ciliaris	14.58	96.7256	88.51	89.6256	95.27	Clade3
23-2-47	2023	Hebei, China	37.1267	114.679	46	Agricultural	D. ciliaris	D. ciliaris	21	96.0867	85.7411	90.3744	95.59	Clade3
MMT-13-20	2013	Shandong, China	36.6857	117.072	37	NA	D. ciliaris	D. ciliaris	17.6	96.6244	87.2689	87.7	95.48	Clade4
23-3-59	2023	Shandong, China	37.7065	117.734	4	Agricultural	Outlier	Outlier	19.07	95.8333	86.0244	87.6056	93.33	NA
W-45-4	2023	Sichuan, China	29.8904	103.856	390	Agricultural	D. ciliaris	D. ciliaris	42	95.01	85.8144	87.4711	95	Clade3
W-112	2023	Guangxi, China	22.524	107.86	103	NA	Outlier	Outlier	19.3	95.5833	85.3756	86.5489	92.71	NA
W-21	2023	Shandong, China	36.0908	115.602	39	Agricultural	D. ciliaris	D. ciliaris	18	95.6889	85.2567	86.7511	94.62	Clade3
YZ2	2023	Hainan, China	18.3445	109.155	4	Natural	Outlier	Outlier	16	83.6778	91.5122	92.4333	79.83	NA	1910.8
WN2	2023	Hainan, China	18.97	110.49	14	NA	D. ciliaris	D. ciliaris	26	95.4767	84.8278	86.8222	94.64	Clade4
W-111	2023	Guangxi, China	23.8411	109.26	88	NA	D. ciliaris	D. ciliaris	22.81	95.7422	84.8422	86.4933	95.35	Clade3
W-123	2023	Guangdong, China	23.1885	113.968	11	NA	D. ciliaris	D. ciliaris	12	95.33	84.7578	86.7767	92.99	Clade3
23-2-24	2023	Shanxi, China	39.4495	114.243	945	Agricultural	D. ciliaris	D. ciliaris	28	95.7756	84.7044	86.4678	94.59	Clade3
W-122	2023	Guangdong, China	23.4776	113.341	31	NA	D. ciliaris	D. ciliaris	15.97	95.3011	84.6144	86.6589	94.24	Clade3
W-126	2023	Guangdong, China	23.3024	113.276	2	NA	D. ciliaris	D. ciliaris	15.21	95.4422	84.8867	86.3378	95.4	Clade3
23-1-57	2023	Shanxi, China	35.3629	111.231	470	Agricultural	D. ciliaris	D. ciliaris	16.73	95.4433	84.69	86.4922	95.09	Clade3
W-57	2023	Henan, China	33.4715	113.596	92	Agricultural	D. ciliaris	D. ciliaris	20.83	95.4056	84.9111	86.4478	94.43	Clade3
23-2-22	2023	Hebei, China	39.3474	114.641	874	Agricultural	D. ciliaris	D. ciliaris	23	95.6833	84.5622	86.27	94.82	Clade3
W-119	2023	Guangdong, China	23.4256	113.783	14	NA	D. ciliaris	D. ciliaris	23	95.1733	84.6911	86.5344	95.13	Clade3
23-2-14	2023	Hebei, China	39.1969	116.269	14	Agricultural	D. ciliaris	D. ciliaris	14	95.58	84.6311	86.1811	94.23	Clade3	1578.21
W-124	2023	Guangdong, China	23.1965	113.985	9	NA	D. ciliaris	D. ciliaris	26	95.6833	84.3333	86.0967	94.95	Clade3
23-1-64-2	2023	Shanxi, China	35.8615	113.18	1080	Agricultural	D. ciliaris	D. ciliaris	22	95.46	84.4967	86.2078	93.67	Clade3
W-45-3	2023	Sichuan, China	29.8904	103.856	390	Agricultural	D. ciliaris	D. ciliaris	24	95.9144	83.8478	86.2011	94.83	Clade3
16-10	2016	Shandong, China	36.6855	117.533	114	NA	D. ciliaris	D. ciliaris	15.09	95.52	84.1044	85.8889	95.35	Clade4	1522.32
MMT-13-17	2013	Shandong, China	36.8359	117.59	214	NA	D. ciliaris	D. ciliaris	21	95.6289	83.9822	85.8378	94.74	Clade3
21-1	2021	Shandong, China	35.5672	117.984	231	NA	D. ciliaris	D. ciliaris	17	95.6678	83.9178	85.8178	93.3	Clade4
23-2-27	2023	Shanxi, China	39.3024	113.778	1169	Agricultural	D. ciliaris	D. ciliaris	19.52	95.2567	84.23	85.8356	96.04	Clade3
QY1	2023	Hainan, China	18.33	109.49	34	Agricultural	D. ciliaris	D. ciliaris	17.17	94.9289	84.14	86.1878	92.84	Clade3
MT-13-21	2013	Hebei, China	38.0278	114.853	58	NA	D. ciliaris	D. ciliaris	18.32	95.1622	84.0811	86.0656	95.89	Clade3
W-114	2023	Guangxi, China	22.9847	108.127	93	NA	D. ciliaris	D. ciliaris	28	95.9433	83.5822	85.5733	95.34	Clade3
23-2-42	2023	Hebei, China	36.5431	114.123	268	Agricultural	D. ciliaris	D. ciliaris	14	95.5567	83.8978	85.5989	94.51	Clade3
15-10	2015	Shandong, China	37.1712	116.441	24	NA	D. ciliaris	D. ciliaris	15.1	94.7544	84.3033	85.8311	95.2	Clade3
MMT-13-7	2013	Henan, China	35.4873	114.099	73	NA	D. ciliaris	D. ciliaris	11	95.6222	83.7311	85.4967	93.72	Clade3
23-1-67	2023	Henan, China	35.612	114.321	71	Agricultural	D. ciliaris	D. ciliaris	14	95.5489	83.7533	85.5078	94.3	Clade3
MMT-13-27	2013	Henan, China	35.3627	114.646	65	NA	D. ciliaris	D. ciliaris	16	95.43	83.7822	85.4711	94.7	Clade3
13-53	2013	Hebei, China	39.7679	117.012	18	NA	D. ciliaris	D. ciliaris	10	95.2044	83.9678	85.5678	94.03	Clade3
W-56	2023	Henan, China	33.4647	113.594	94	Agricultural	D. ciliaris	D. ciliaris	14	94.9633	83.8189	85.8633	94.9	Clade3
W-95	2023	Fujian, China	26.2856	119.036	527	NA	D. ciliaris	D. ciliaris	26	94.5933	83.9356	85.9067	95.11	Clade4
23-1-63	2023	Shanxi, China	35.6081	112.34	721	Agricultural	D. ciliaris	D. ciliaris	20.86	95.1411	83.8211	85.3178	95.87	Clade3
23-1-33	2023	Henan, China	33.505	113.61	75	Agricultural	D. ciliaris	D. ciliaris	18	95.5367	83.6378	85.0856	93.58	Clade3
MMT-13-9	2013	Shandong, China	36.3947	120.454	22	NA	D. ciliaris	D. ciliaris	14	95.25	83.69	85.2389	94.62	Clade3
15-111	2015	Shandong, China	35.9553	116.578	55	NA	D. ciliaris	D. ciliaris	18.41	95.2433	83.5256	85.3611	95.23	Clade3
21-25	2021	Jiangsu, China	34.5483	118.855	14	NA	D. ciliaris	D. ciliaris	19	95.0378	84.05	85.1267	93.97	Clade3
15-116	2015	Hebei, China	39.4911	115.982	38	NA	D. ciliaris	D. ciliaris	14.86	94.8667	83.81	85.2622	95.09	Clade3
23-2-12	2023	Hebei, China	38.9854	116.086	13	Agricultural	D. ciliaris	D. ciliaris	18	95.3478	83.4467	85.0922	94.35	Clade3
MMT-13-8	2013	Henan, China	35.6819	114.558	58	NA	D. ciliaris	D. ciliaris	23	95.2822	83.4278	85.1489	94.29	Clade4
MMT-13-33	2013	Hebei, China	37.9493	115.224	36	NA	D. ciliaris	D. ciliaris	17	94.9644	83.4056	85.3033	94.57	Clade3
MMT-13-25	2013	Shandong, China	37.7359	117.238	11	NA	D. ciliaris	D. ciliaris	14	95.0311	82.9356	84.75	94.22	Clade3	1341.22
23-2-21	2023	Hebei, China	39.3559	114.865	800	Agricultural	D. ciliaris	D. ciliaris	14	94.7778	82.9178	84.5611	94.45	Clade3
MMT-13-21	2013	Shanxi, China	34.8728	110.455	347	NA	D. ciliaris	D. ciliaris	22	95.1989	82.6878	84.2244	92.51	Clade3
13-66	2013	Hebei, China	38.3102	116.846	11	NA	D. ciliaris	D. ciliaris	15	94.3789	83.0833	84.6644	94.33	Clade3
23-1-50	2023	Shanxi, China	34.58	110.108	342	Agricultural	D. ciliaris	D. ciliaris	14	94.8589	82.7178	84.5044	94.36	Clade3
23-1-74	2023	Shandong, China	36.1208	115.798	42	Agricultural	D. ciliaris	D. ciliaris	12	94.5678	83.4222	84.1444	94.81	Clade4
15-85	2015	Hebei, China	39.7679	117.012	18	NA	D. ciliaris	D. ciliaris	14.41	94.5222	82.7889	84.5578	94.94	Clade3
YZ1	2023	Hainan, China	18.3622	109.175	6	Natural	D. bicornis	D. bicornis	17	66.4344	84.26	85.4922	78.38	Clade4	1846.67
HNDF1	2023	Hainan, China	18.87	108.71	19	NA	D. bicornis	D. bicornis	21.81	65.7056	84.6222	85.8422	75.01	Clade4
YZ4	2023	Hainan, China	18.34	109.14	1	NA	D. bicornis	D. bicornis	15.65	65.3322	84.0744	85.3522	76.84	Clade4	2007.25
LD1	2023	Hainan, China	18.45	108.98	70	NA	D. bicornis	D. bicornis	25	65.2289	83.5778	84.8478	76.89	Clade4	1911.91
LD3	2023	Hainan, China	18.45	108.98	70	NA	D. bicornis	D. bicornis	12	64.51	82.9233	84.0744	77	Clade4
DZ2-2	2023	Hainan, China	19.58	109.5	55	NA	D. milanjiana	D. milanjiana	35	7.96444	86.5722	87.75	93.17	Clade3	919.71	809.07
HZ1	2023	Zhejiang, China	30.1925	120.051	41	Agricultural	D. radicosa	D. radicosa	15	96.38	4.20778	3.56111	88.94	Clade3
NT3	2023	Jiangsu, China	32.0156	120.892	6	NA	D. radicosa	D. radicosa	16	95.5789	2.64556	2.38556	98.12	Clade3
YZGJ2	2023	Jiangsu, China	32.4027	119.377	10	Natural	D. radicosa	D. radicosa	13	95.6289	2.06889	1.79889	98.05	Clade3	464.44
W-135	2023	Heilongjiang, China	45.7155	125.285	149	NA	D. violascens	D. violascens	66	20.9911	20.7578	18.4844	24.8	Clade2		563.05
W-80	2023	Jilin, China	43.8833	127.347	306	NA	D. violascens	D. violascens	31.47	19.9367	19.57	17.3211	23.4	Clade2		593.86
W-94	2023	Heilongjiang, China	44.3946	127.115	275	NA	D. violascens	D. violascens	15	23.1989	18.8444	14.6189	20.22	Clade2
W-19-2	2023	Gansu, China	35.2216	106.592	1470.6	Agricultural	D. violascens	D. violascens	26	18.5267	17.9589	15.7811	20.67	Clade2	666.98
15-1-2	2015	Shanxi, China	36.5746	111.762	596	NA	D. violascens	D. violascens	18	18.3933	17.79	15.6078	20.54	Clade2
23-2-26	2023	Shanxi, China	39.4369	113.928	1165	Agricultural	D. violascens	D. violascens	19	18.0867	17.59	15.3611	21.92	Clade2
15-2-2	2015	Shandong, China	36.749	117.126	27	NA	D. violascens	D. violascens	26	17.9689	17.3678	15.1367	23.25	Clade2
W-88	2023	Jilin, China	43.4613	126.482	309	NA	D. violascens	D. violascens	27	17.8778	17.41	15.2589	23.09	Clade2
W-77-2	2023	Jilin, China	43.455	123.475	126	NA	D. violascens	D. violascens	21	17.7689	17.2033	14.9789	22.15	Clade2
W-82	2023	Jilin, China	43.1925	124.242	170	NA	D. violascens	D. violascens	16	17.7056	17.1367	14.9478	23.67	Clade2
W-18	2023	Gansu, China	34.2511	105.55	1346.1	Agricultural	D. violascens	D. violascens	27	17.5922	17.0689	14.8956	21.4	Clade2
W-77	2023	Jilin, China	43.455	123.475	126	NA	D. violascens	D. violascens	23	17.5067	17.0367	14.8622	21.34	Clade2	681.82
W-86	2023	Jilin, China	44.5244	124.53	209	NA	D. violascens	D. violascens	14	17.6367	16.9756	14.72	26.6	Clade2	652.14
W-134	2023	Heilongjiang, China	45.7742	125.588	187	NA	D. violascens	D. violascens	12	17.1	16.5944	14.4356	19.36	Clade2
W-89	2023	Heilongjiang, China	45.2421	126.223	156	NA	D. violascens	D. violascens	16.8	17.1	16.46	14.2944	22.64	Clade2
W-72	2023	Heilongjiang, China	47.2965	132.189	71.3	Agricultural	D. violascens	D. violascens	10	15.39	14.6989	12.7144	21.62	Clade2
W-103	2023	Jiangsu, China	33.2179	119.004	4	NA	D. ischaemum	D. ischaemum	34	10.3922	10.3833	9.11	6.75	Clade1
W-8-2	2023	Ningxia, China	37.46	105.75	1150	Agricultural	D. ischaemum	D. ischaemum	18	9.03556	8.69	7.34222	12.2	Clade1
23-2-1-2	2023	Shandong, China	36.9402	116.644	23	Agricultural	D. ischaemum	D. ischaemum	28	8.34444	7.94444	6.63444	12.6	Clade1	1266.14
W-143	2023	Henan, China	33.1566	114.787	44	NA	D. ischaemum	D. ischaemum	14	7.83889	7.49444	6.13667	13.54	Clade1
23-2-32	2023	Shanxi, China	38.4448	112.688	794	Agricultural	D. ischaemum	D. ischaemum	15	7.59778	7.45556	6.27556	8.37	Clade1
23-1-21	2023	Anhui, China	33.0706	115.312	33	Agricultural	D. ischaemum	D. ischaemum	12	7.71	7.36667	6.02667	15.11	Clade1
15-95	2015	Shanxi, China	34.2804	107.756	488	NA	D. ischaemum	D. ischaemum	19	7.53444	7.34889	6.22556	8.29	Clade1
15-92	2015	Shanxi, China	37.3471	116.589	20	NA	D. ischaemum	D. ischaemum	27	7.34778	7.22	6.05778	8.91	Clade1
W-146-1	2023	Henan, China	33.2292	114.883	39	NA	D. ischaemum	D. ischaemum	27	7.25778	6.86667	5.63333	13.27	Clade1

## Sheet: Table8
Supplementary Table 8. Sampling diversity of Digitaria accessions across multiple provinces.
	D. ischaemum	D. violascens	D. bicornis	D. ciliaris	D. sanguinalis	Simpson index	Shanno index
AH	1	0	0	0	27	0.0688776	0.154076
BJ	0	0	0	0	2	0	0
FJ	0	0	0	1	2	0.444444	0.636514
GD	0	0	0	5	2	0.408163	0.59827
GS	0	2	0	0	6	0.375	0.562335
GX	0	0	0	2	5	0.408163	0.59827
GZ	0	0	0	0	5	0	0
HB	0	0	0	12	40	0.35503	0.540204
HLJ	0	5	0	0	19	0.329861	0.51174
HN	2	0	0	7	59	0.235727	0.460943
HaiN	0	0	5	2	7	0.602041	0.992282
HillX	2	2	0	6	35	0.373333	0.740877
HuB	0	0	0	0	6	0	0
HuN	0	0	0	0	1	0	0
JL	0	6	0	0	12	0.444444	0.636514
JS	1	0	0	1	33	0.109388	0.258641
JX	0	0	0	0	2	0	0
LN	0	0	0	0	7	0	0
NX	1	0	0	0	6	0.244898	0.410116
SC	0	0	0	2	6	0.375	0.562335
SD	1	1	0	11	150	0.148519	0.320915
SX	1	0	0	1	28	0.126667	0.29114
TJ	0	0	0	0	3	0	0
YN	0	0	0	0	1	0	0
ZJ	0	0	0	0	17	0	0

## Sheet: Table9
Supplementary Table 9. Likelihood comparison of demographic models for divergence history inference.
Scenario	# Params	Delta likelihood	AIC
model 1	25	1.98041e+06	6.12717e+07
model 2	26	1.34084e+06	5.83264e+07
model 3	27	1.01199e+06	5.6812e+07
model 4	28	944424	5.65008e+07
model 5	32	915622	5.63682e+07
model 6	30	1.00806e+06	5.67939e+07
model 7	35	903318	5.63115e+07
model 8	35	887466	5.62385e+07

## Sheet: Table10
Supplementary Table 10. Inferred parameters under the final joint model for all five populations. Only migrations whose estimations are greater than 1e-5 are shown in Fig. 2e.
Parameters	Point estimations	Median estimations	﻿95% Confidence Interval
			Lower bound	Upper bound
NC4	8561	21886	3129	120537
TDIV4	1071680	1315441	712489	2921965
TDIV3	53926	287596	37101	1423489
TDIV2	46719	115404	18199	1156488
TDIV1	39561	21664	2919	438092
TMA	163580	654729	137514	1956152
TMD	431653	936823	350044	2420993
TME	1910	3524	299	26845
TMS	17	243	36	3978
NC5E1	86849	297126	45643	1177518
NC5E2	42539	88934	9137	495336
NC5NE	40874	161937	22075	761620
NC5S	52663	90861	15654	637574
NANC1	453055	757259	96844	5578979
NANC2	88097	264119	41208	708229
NANC3	290627	937736	95911	5417708
NANC4	212274	468796	53151	2954323
M1	0.000195867	8.85759e-05	1.38143e-05	0.00088
M2	6.59343e-06	0.000281	2.73531e-06	0.000924
M3	1.91193e-05	1.3678e-05	2.22623e-06	0.000264
M4	0.000182419	1.30392e-06	1.17988e-06	0.000102
M5	0.000106579	4.29774e-06	1.24909e-06	0.000191
M6	1.22883e-05	4.7772e-06	1.20827e-06	0.000284

[truncated: 14 more sheets: Table11, Table12, Table13, Table14, Table15, Table16, Table17, Table18, Table19, Table20, Table21, Table22, Table23, Table24]
