# Supplementary material for: The Digitaria genomes reveal local adaption and herbicide resistance mediated by introgression
Source: Research Square preprint supplement (doi:10.21203/rs.3.rs-7329239/v1), 2025-09-13
Supplement: Supplementary file 2 [file 805ff10b65c1761137e04073.xlsx]

## Sheet: Data1
Supplementary Data 1. Gene domain expansion and contraction among species.
Pfam	Pfam description	Dexi-A	Dexi-B	Dmil-D	Dmil-E	Drad	Dsan-C	Dsan-D	Dsan-E	Ecru-A	Ecru-B	Ecru-C	Ehap	Eind	Eory-A	Eory-B	Osat	Phal	Sbic	Sita
PF00004	ATPase family associated with various cellular activities (AAA)	128	133	150	147	141	132	124	148	121	143	147	166	94	134	136	162	186	171	156
PF00005	ABC transporter	192	201	230	240	230	207	197	214	180	200	205	225	163	187	199	216	288	309	236
PF00006	ATP synthase alpha/beta family, nucleotide-binding domain	8	7	10	11	20	7	8	7	7	7	8	8	6	9	8	20	18	13	14
PF00008	EGF-like domain	1		2	1		1	3	2	1	1		1		1		1	1	1	1
PF00009	Elongation factor Tu GTP binding domain	29	34	31	35	31	30	29	36	30	33	36	39	30	30	34	40	47	43	42
PF00010	Helix-loop-helix DNA-binding domain	126	125	165	159	150	136	149	148	144	148	159	163	98	152	144	188	198	270	172
PF00011	Hsp20/alpha crystallin family	39	35	44	38	46	36	37	29	37	40	49	52	20	34	42	43	44	48	45
PF00012	Hsp70 protein	49	58	36	48	36	54	33	40	41	47	42	57	14	42	36	46	31	39	35
PF00013	KH domain	42	47	68	65	68	63	68	67	60	55	74	68	55	65	57	89	92	107	96
PF00016	Ribulose bisphosphate carboxylase large chain, catalytic domain				2	5								1			5	5	3	1
PF00018	SH3 domain	1	1	1	1	1	1		1	1	1	2	1	1	1	1	2	2	4	2
PF00022	Actin	19	21	18	18	19	19	17	19	22	20	19	23	19	19	21	34	23	32	27
PF00023	Ankyrin repeat	46	32	56	68	62	57	55	64	49	54	70	60	33	59	62	87	54	78	56
PF00024	PAN domain	5	5	7	4	7	5	5	3	3	3	2	3	2	2	2	11	7	6	7
PF00025	ADP-ribosylation factor family	24	20	21	20	23	26	21	21	22	20	21	22	16	24	19	37	26	35	38
PF00026	Eukaryotic aspartyl protease	5	5	5	7	5	5	6	5	5	6	5	8	5	5	5	19	10	17	11
PF00027	Cyclic nucleotide-binding domain	14	15	24	21	22	22	23	22	21	22	24	25	15	22	19	26	44	31	24
PF00031	Cystatin domain									1	1	1			1	1		1	1
PF00032	Cytochrome b(C-terminal)/b6/petD			5	1	6								1			4	2	1	2
PF00033	Cytochrome b/b6/petB			4	2	6							1	1	1		3	5	1	2
PF00034	Cytochrome c	2	2	3	3	3	2	3	2	4	3	4	4	1	3	2	3	2	3	4
PF00035	Double-stranded RNA binding motif	23	21	26	26	29	28	23	28	27	31	28	29	28	29	27	40	51	39	29
PF00036	EF hand domain	4	6	8	7	5	6	5	4	6	5	10	7	2	5	4	15	6	11	10
PF00037	4Fe-4S binding domain	4	2	5	6	7	2	2	2	2	1	2	3	2	1	1	5	2	4	2
PF00041	Fibronectin type III domain	1	1	2	2	2	2	2	2	1	2	2	2	2	2	2	3	6	3	2
PF00042	Globin	2	1	2	2	2	2	2	2	2	1	2	2	3	2	3	6	3	2	4
PF00043	Glutathione S-transferase, C-terminal domain	45	49	37	43	46	41	40	48	32	32	36	50	21	35	36	43	39	55	52
PF00044	Glyceraldehyde 3-phosphate dehydrogenase, NAD binding domain	8	7	7	9	9	9	7	9	6	8	7	6	7	7	6	15	7	17	8
PF00046	Homeodomain	59	61	69	70	72	70	56	64	72	67	67	72	57	73	63	88	88	85	74
PF00056	lactate/malate dehydrogenase, NAD binding domain	10	10	14	12	13	11	11	12	12	14	13	11	9	11	12	18	11	15	21
PF00059	Lectin C-type domain		1	1	1	1	1	1	1	1	1	1	1	1	1	1	2	2	1	2
PF00060	Ligand-gated ion channel	10	8	20	13	22	22	18	13	13	16	15	19	12	16	17	26	26	47	20
PF00063	Myosin head (motor domain)	19	20	13	16	12	14	16	22	12	12	11	14	12	14	10	18	23	20	17
PF00067	Cytochrome P450	385	407	336	363	345	336	342	375	283	335	337	312	181	358	370	435	337	451	377
PF00069	Protein kinase domain	685	664	748	785	822	737	669	683	634	678	696	769	583	634	609	1311	1186	1244	1030
PF00070	Pyridine nucleotide-disulphide oxidoreductase					1	1
PF00071	Ras family	67	66	61	64	60	61	61	60	66	65	60	75	54	59	55	85	63	79	75
PF00072	Response regulator receiver domain	27	24	48	48	49	48	38	45	46	41	47	53	28	51	43	61	53	58	50
PF00076	RNA recognition motif	303	301	373	383	380	368	360	384	363	395	382	407	304	370	370	645	550	750	476
PF00078	Reverse transcriptase (RNA-dependent DNA polymerase)	13	13	79	124	105	42	30	53	87	99	93	66	8	72	104	27		3	1
PF00079	Serpin (serine protease inhibitor)	20	18	15	24	23	19	14	22	16	47	26	37	8	17	37	26	17	25	17
PF00080	Copper/zinc superoxide dismutase (SODC)	5	5	5	6	6	5	5	5	6	4	5	5	5	6	5	12	6	8	11
PF00081	Iron/manganese superoxide dismutases, alpha-hairpin domain	3	3	3	3	3	3	3	3	3	3	3	3	3	2	4	5	4	5	6
PF00082	Subtilase family	52	55	67	63	54	58	58	52	51	51	55	31	28	55	54	68	75	63	73
PF00083	Sugar (and other) transporter	120	118	128	120	120	112	122	120	113	105	115	117	53	111	109	146	130	160	140
PF00085	Thioredoxin	59	58	67	66	68	71	63	65	61	68	69	71	54	60	62	103	83	86	85
PF00091	Tubulin/FtsZ family, GTPase domain	16	16	17	16	16	16	17	17	20	15	22	20	15	17	17	21	20	22	17
PF00092	von Willebrand factor type A domain	7	6	14	17	13	12	8	16	11	14	16	24	12	12	10	15	13	18	14
PF00096	Zinc finger, C2H2 type	15	19	22	20	21	20	21	21	17	22	23	23	19	21	22	31	34	19	23
PF00097	Zinc finger, C3HC4 type (RING finger)	13	11	25	29	28	29	26	28	20	26	28	28	19	19	24	33	50	36	34
PF00098	Zinc knuckle	30	27	78	83	87	68	52	76	128	115	113	85	41	90	87	134	106	354	95
PF00101	Ribulose bisphosphate carboxylase, small chain	3	3	2	3	2	3	2	3	5	5	5	6	4	5	5	6	6	1	6
PF00102	Protein-tyrosine phosphatase	4	4	5	5	5	6	4	7	2	5	3	4	2	1	4	4	3	3	5
PF00106	short chain dehydrogenase	79	75	76	83	79	70	88	77	65	72	70	79	57	57	68	123	74	96	94
PF00107	Zinc-binding dehydrogenase	41	41	47	47	44	47	39	46	43	31	40	48	28	37	40	56	50	55	50
PF00108	Thiolase, N-terminal domain	5	5	7	3	5	6	6	6	4	4	4	5	4	4	4	7	10	10	13
PF00109	Beta-ketoacyl synthase, N-terminal domain	7	7	6	6	6	7	6	6	6	7	7	6	5	6	6	6	8	5	7
PF00111	2Fe-2S iron-sulfur cluster binding domain	14	13	18	19	20	17	16	16	17	17	18	15	13	16	15	23	22	25	19
PF00112	Papain family cysteine protease	37	37	39	47	45	33	35	37	40	54	51	63	22	41	51	66	33	55	81
PF00113	Enolase, C-terminal TIM barrel domain	6	6	6	5	5	6	6	5	5	4	7	5	5	5	4	9	5	6	5
PF00115	Cytochrome C and Quinol oxidase polypeptide I																1	2	1	2
PF00116	Cytochrome C oxidase subunit II, periplasmic domain			1	4	2												1		1
PF00117	Glutamine amidotransferase class-I	17	16	17	18	17	17	17	16	16	16	16	14	15	14	14	26	20	30	23
PF00118	TCP-1/cpn60 chaperonin family	38	33	31	31	35	37	33	32	28	26	27	30	28	29	27	39	34	32	35
PF00119	ATP synthase A chain			1	1	3											4	3	2	3
PF00120	Glutamine synthetase, catalytic domain	7	6	5	7	5	5	5	7	5	4	5	5	4	4	5	9	5	9	7
PF00121	Triosephosphate isomerase	3	3	3	3	4	3	3	3	5	6	2	4	1	5	2	8	3	5	7
PF00122	E1-E2 ATPase	35	32	42	39	42	40	38	41	46	46	41	43	42	46	46	49	73	84	51
PF00124	Photosynthetic reaction centre protein			5	4	5								1			9	4		4
PF00125	Core histone H2A/H2B/H3/H4	35	41	45	46	51	42	41	45	42	47	48	47	22	44	42	53	41	55	55
PF00127	Copper binding proteins, plastocyanin/azurin family	1	1	2	2	2	1	1	2	2	2	1	2		4	1	1	1	1
PF00128	Alpha amylase, catalytic domain	15	16	18	16	16	16	15	20	15	23	14	14	12	14	19	28	21	31	29
PF00130	Phorbol esters/diacylglycerol binding domain (C1 domain)	2	2	3	2	5	3	3	3	2	2	3	2	3	2	2	6	8	3	3
PF00132	Bacterial transferase hexapeptide (six repeats)	5	5	8	9	9	8	7	7	8	7	7	9	6	9	5	15	11	15	13
PF00133	tRNA synthetases class I (I, L, M and V)	8	9	11	16	13	10	10	17	9	19	12	12	12	12	12	18	11	25	15
PF00134	Cyclin, N-terminal domain	33	37	40	41	45	44	37	39	41	38	42	45	31	43	39	61	61	69	47
PF00136	DNA polymerase family B	5	4	5	5	6	5	5	8	4	3	4	4	5	4	3	3	9	6	4
PF00137	ATP synthase subunit C	7	8	10	9	14	10	10	7	10	10	10	11	8	11	11	19	15	10	6
PF00139	Legume lectin domain	54	52	42	42	53	39	39	41	16	29	22	17	9	17	19	102	60	61	61
PF00141	Peroxidase	161	166	157	178	148	151	160	153	156	172	172	167	68	127	142	183	162	172	171
PF00144	Beta-lactamase	1		1	1	1	1	1	2	1	1	1	1	1	1	1	2	2	1	3
PF00145	C-5 cytosine-specific DNA methylase	7	6	11	10	12	8	11	12	9	9	8	7	8	9	7	10	9	19	10
PF00146	NADH dehydrogenase			3	5	4	1	1						1			2	3		3
PF00149	Calcineurin-like phosphoesterase	56	51	66	64	69	65	63	64	55	59	63	65	49	62	59	79	89	99	85
PF00150	Cellulase (glycosyl hydrolase family 5)	15	16	15	16	17	14	13	16	16	18	18	18	12	14	20	22	19	16	19
PF00152	tRNA synthetases class II (D, K and N)	10	15	15	14	12	12	15	12	15	10	12	15	9	14	13	18	13	15	20
PF00153	Mitochondrial carrier protein	144	152	180	180	182	181	169	173	159	170	179	180	139	184	176	258	233	355	209
PF00154	recA bacterial DNA recombination protein	8	3	5	8	5	5	4	6	3	4	6	5	3	4	4	5	11	4	5
PF00155	Aminotransferase class I and II	42	46	41	42	39	40	40	42	35	36	41	36	30	32	37	54	43	63	47
PF00156	Phosphoribosyl transferase domain	6	6	7	8	7	7	7	7	6	6	8	9	6	7	7	17	8	10	9
PF00160	Cyclophilin type peptidyl-prolyl cis-trans isomerase/CLD	28	26	30	30	29	28	28	27	27	26	28	34	20	28	26	45	35	46	35
PF00161	Ribosome inactivating protein	14	16	14	28	21	18	22	30	8	28	20	35	12	8	31	36	19	16	15
PF00162	Phosphoglycerate kinase	4	3	7	6	5	5	6	6	5	6	7	6	3	5	6	11	4	10	6
PF00163	Ribosomal protein S4/S9 N-terminal domain	5	5	4	7	9	5	4	5	5	5	5	5	4	5	5	8	8	7	8
PF00164	Ribosomal protein S12/S23	3	3	5	4	3	3	4	3	4	4	2	3	2	3	1	7	4	5	4
PF00166	Chaperonin 10 Kd subunit	9	9	11	9	9	9	9	9	10	9	9	10	9	10	9	17	9	15	18
PF00168	C2 domain	101	96	142	137	137	121	130	123	104	113	116	129	77	124	110	180	200	189	158
PF00169	PH domain	9	9	19	20	19	18	17	20	17	23	22	23	14	21	18	21	30	28	23
PF00170	bZIP transcription factor	57	60	80	81	82	79	72	74	78	75	75	75	49	73	70	126	132	154	91
PF00171	Aldehyde dehydrogenase family	18	19	19	21	21	21	20	21	20	21	22	22	20	19	20	35	24	35	42
PF00173	Cytochrome b5-like Heme/Steroid binding domain	15	17	22	20	20	21	20	21	20	17	19	24	14	21	20	24	27	25	24
PF00174	Oxidoreductase molybdopterin binding domain	6	6	8	6	6	6	7	7	6	5	6	6	6	6	6	5	6	5	5
PF00175	Oxidoreductase NAD-binding domain	13	16	18	16	17	17	17	17	18	15	17	17	16	17	17	20	19	20	16
PF00176	SNF2-related domain	34	33	39	45	46	46	38	47	37	43	42	44	36	39	40	54	70	79	55
PF00177	Ribosomal protein S7p/S5e	2	2	8	6	8	3	3	3	2	1	2	2	2	2	1	15	5	3	5
PF00179	Ubiquitin-conjugating enzyme	60	58	51	58	56	53	44	55	52	60	58	68	41	55	59	81	60	68	72
PF00180	Isocitrate/isopropylmalate dehydrogenase	8	8	8	7	7	7	8	7	7	8	8	7	7	7	7	12	10	10	7
PF00181	Ribosomal Proteins L2, RNA binding domain	3	3	5	4	6	3	3	4	3	4	3	4	3	4	2	1	7	5	7
PF00182	Chitinase class I	33	35	18	23	28	22	22	24	21	15	16	25	13	17	16	20	25	25	26
PF00183	Hsp90 protein	10	11	7	12	8	8	8	8	11	8	7	8	11	9	8	16	7	7	12
PF00185	Aspartate/ornithine carbamoyltransferase, Asp/Orn binding domain	2	2	2	2	2	2	2	2	2	2	2	2	2	2	2	2	3	3	2
PF00186	Dihydrofolate reductase	2	2	2	2	3	2	2	2	1	1	1	1	1	1	1	2	6	2	3
PF00187	Chitin recognition protein	17	19	11	11	19	10	9	9	7	19	19	26	4	7	14	13	12	11	14
PF00188	Cysteine-rich secretory protein family	14	11	9	8	19	9	5	11	14	20	24	24	4	24	15	43	17	14	18
PF00189	Ribosomal protein S3, C-terminal domain	1		4	2	3	2	2	2	2	1	3	2	2	2	2	11	4	2	3
PF00190	Cupin	46	53	48	60	52	36	32	34	52	53	50	40	21	50	49	101	50	70	56
PF00191	Annexin	30	33	31	33	35	33	32	30	29	29	31	34	24	27	29	37	43	39	38
PF00194	Eukaryotic-type carbonic anhydrase	10	10	9	10	8	7	9	9	6	9	26	13	9	7	18	15	10	10	13
PF00195	Chalcone and stilbene synthases, N-terminal domain	30	32	22	27	20	24	30	36	34	36	28	38	9	22	23	35	16	40	25
PF00197	Trypsin and protease inhibitor	1	1	2	4	2	2	1	1	1	2	2	2		1	1	1	1	2	2
PF00198	2-oxoacid dehydrogenases acyltransferase (catalytic domain)	7	7	9	9	10	10	10	9	9	9	10	10	8	9	8	23	9	10	12
PF00199	Catalase	3	3	3	3	3	3	3	3	3	4	3	4	3	3	3	6	3	5	5
PF00201	UDP-glucoronosyl and UDP-glucosyl transferase	183	186	162	161	192	139	114	118	43	55	62	66	55	69	86	201	188	220	216
PF00202	Aminotransferase class-III	11	10	9	10	10	10	9	10	13	9	10	12	8	12	10	17	12	11	19
PF00203	Ribosomal protein S19	3	3	7	7	10	5	4	5	4	3	3	3	2	3	3	8	7	4	4
PF00204	DNA gyrase B	4	3	3	3	5	5	2	4	4	4	3	3	3	2	4	4	3	2	4
PF00205	Thiamine pyrophosphate enzyme, central domain	2	2	5	6	6	6	5	6	5	6	6	7	4	6	5	13	7	7	7
PF00206	Lyase	5	4	5	4	5	5	6	4	3	3	3	3	2	3	3	6	3	6	5
PF00208	Glutamate/Leucine/Phenylalanine/Valine dehydrogenase	6	4	3	3	4	4	3	3	3	3	3	3	3	3	3	8	7	5	11
PF00210	Ferritin-like domain	1	1	1	1	1	1	1	1	5	2	3	2	2	4	3	5	2	3	6
PF00213	ATP synthase delta (OSCP) subunit	3	3	3	3	3	3	3	3	3	3	2	2	4	4	2	5	3	3	3
PF00215	Orotidine 5'-phosphate decarboxylase / HUMPS family	3	2	2	2	2	2	2	3	2	2	2	2	2	2	2	2	2	3	2
PF00218	Indole-3-glycerol phosphate synthase	3	3	3	3	3	3	3	3	3	3	7	5	4	4	4	4	4	8	8
PF00221	Aromatic amino acid lyase	7	7	8	7	8	8	7	6	8	11	9	11	4	7	10	13	7	8	11
PF00223	Photosystem I psaA/psaB protein				5	13								5			8	9	1	6
PF00224	Pyruvate kinase, barrel domain	12	13	11	12	11	11	12	11	12	11	11	13	10	10	10	14	12	14	18
PF00225	Kinesin motor domain	53	52	56	56	53	65	55	55	53	59	56	59	54	55	60	64	82	76	61
PF00226	DnaJ domain	74	66	99	93	103	92	89	95	84	86	86	87	73	81	78	126	125	147	115
PF00227	Proteasome subunit	22	22	23	22	24	22	22	23	20	24	23	25	26	21	21	33	27	25	24
PF00228	Bowman-Birk serine protease inhibitor family	6	6	11	4	7	6	4	4	8	12	6	11	2	4	7	21	6	7	8
PF00230	Major intrinsic protein	41	40	41	37	42	42	37	40	42	44	40	42	22	44	40	47	40	47	52
PF00231	ATP synthase	1	1	2	2	2	2	2	2	2	1	2	2	1	2	2	2	2	3	2
PF00232	Glycosyl hydrolase family 1	61	65	54	59	47	48	48	52	41	39	40	45	36	41	38	87	59	91	51
PF00234	Protease inhibitor/seed storage/LTP family	21	17	24	24	29	10	9	6	24	20	24	30	9	31	25	48	25	28	26
PF00235	Profilin	4	4	6	4	5	5	6	5	4	5	4	6	3	4	5	4	7	6	6
PF00237	Ribosomal protein L22p/L17e	5	5	8	7	11	7	7	5	5	4	4	4	3	4	4	9	10	5	11
PF00238	Ribosomal protein L14p/L23e	5	5	4	4	10	6	3	4	4	4	4	4	5	6	3	12	11	4	6
PF00240	Ubiquitin family	29	28	110	110	117	81	76	74	112	99	147	71	37	108	104	174	110	207	186
PF00241	Cofilin/tropomyosin-type actin-binding protein	9	11	10	10	10	9	9	10	10	8	10	11	10	8	7	12	11	13	12
PF00244	14-3-3 protein	6	6	12	13	9	10	12	12	11	8	13	13	6	11	8	21	8	8	13
PF00246	Zinc carboxypeptidase	3	3	2	2	2	2	2	2	2	3	2	2	1	2	2	5	6	2	4
PF00248	Aldo/keto reductase family	49	49	46	51	50	49	54	55	43	46	34	44	19	39	41	52	58	55	50
PF00249	Myb-like DNA-binding domain	292	290	364	355	342	321	327	344	339	362	350	378	266	337	353	423	453	465	375
PF00251	Glycosyl hydrolases family 32 N-terminal domain	16	17	15	18	14	19	17	20	13	13	16	14	11	14	12	16	18	17	17
PF00252	Ribosomal protein L16p/L10e	4	4	6	7	10	4	4	4	4	4	4	3	3	4	4	11	11	4	4
PF00253	Ribosomal protein S14p/S29e			5	5	8	3	3	4	3	3	3	4	1	3	3	7	6	4	5
PF00254	FKBP-type peptidyl-prolyl cis-trans isomerase	30	29	33	34	36	36	33	36	29	34	34	34	34	32	34	70	38	45	51
PF00255	Glutathione peroxidase	7	8	7	8	7	7	7	8	5	7	7	7	6	6	8	7	7	10	7
PF00257	Dehydrin	8	8	8	9	8	9	7	8	8	8	7	7	9	5	8	8	6	6	11
PF00258	Flavodoxin	6	6	5	6	5	5	5	6	6	4	5	9	6	5	5	5	6	5	8
PF00262	Calreticulin family	12	12	14	11	11	11	13	11	9	9	11	10	8	7	7	21	9	19	16
PF00264	Common central domain of tyrosinase	13	12	11	15	9	7	9	11	6	8	10	9	4	7	8	5	10	9	4
PF00265	Thymidine kinase	1	1	1	1	1	1	1	1	1	1	1	1	1	1	1	3	1	3	1
PF00266	Aminotransferase class-V	11	14	13	15	15	16	14	13	13	11	10	13	19	13	11	17	20	23	19
PF00268	Ribonucleotide reductase, small chain	1	2	2	2	2	2	2	2	2	1	2	2		2	1	2	2	4	2
PF00270	DEAD/DEAH box helicase	81	85	95	93	101	103	92	96	87	93	87	93	86	94	89	134	136	192	125
PF00271	Helicase conserved C-terminal domain	106	106	135	131	142	145	128	138	118	136	126	137	122	127	127	192	216	277	176
PF00274	Fructose-bisphosphate aldolase class-I	5	5	7	8	6	6	5	7	5	6	6	8	7	6	6	15	6	6	7
PF00275	EPSP synthase (3-phosphoshikimate 1-carboxyvinyltransferase)	1	2	1	1	1	1	1	1	1	1	1	1	3	1	1	1	1	1	1
PF00276	Ribosomal protein L23	3	4	8	7	9	4	4	4	3	4	5	4	2	3	4	12	9	7	5
PF00278	Pyridoxal-dependent decarboxylase, C-terminal sheet domain	5	4	3	4	4	4	3	2	5	2	2	5	1	3	4	3	4	6	3
PF00280	Potato inhibitor I family	29	23	14	19	13	14	15	15	7	18	22	23	9	7	16	16	39	35	30
PF00281	Ribosomal protein L5	3	4	4	3	4	4	5	4	4	5	3	4	4	4	4	5	4	6	3
PF00282	Pyridoxal-dependent decarboxylase conserved domain	14	12	21	21	25	16	19	19	21	24	24	29	13	26	29	21	22	19	26
PF00283	Cytochrome b559, alpha (gene psbE) and beta (gene psbF)subunits				3	5											3	8		4
PF00284	Lumenal portion of Cytochrome b559, alpha (gene psbE) subunit				3	5											3	3		2
PF00285	Citrate synthase, C-terminal domain	4	3	3	3	3	3	3	3	3	5	4	9	4	4	4	9	4	5	6
PF00288	GHMP kinases N terminal domain	14	8	13	9	11	11	10	12	12	12	10	12	10	13	12	17	26	15	12
PF00289	Biotin carboxylase, N-terminal domain	3	3	3	3	3	3	4	5	3	4	4	5	2	5	3	3	4	5	5
PF00290	Tryptophan synthase alpha chain	4	5	11	11	13	12	11	11	4	6	6	5	5	2	6	6	5	5	10
PF00291	Pyridoxal-phosphate dependent enzyme	22	18	22	17	19	21	21	18	18	16	18	19	15	20	16	38	23	42	28
PF00293	NUDIX domain	18	19	24	21	24	21	22	22	23	21	23	23	19	27	21	29	34	37	26
PF00294	pfkB family carbohydrate kinase	19	19	14	14	19	22	17	14	19	22	13	21	17	21	16	27	18	30	25
PF00295	Glycosyl hydrolases family 28	42	49	46	44	42	42	43	43	47	47	41	52	31	39	47	50	53	57	47
PF00297	Ribosomal protein L3	4	4	4	4	4	4	4	3	4	4	4	4	3	4	4	4	5	5	4
PF00298	Ribosomal protein L11, RNA binding domain	1	3	5	6	6	6	5	6	7	6	5	5	3	6	4	5	7	7	7
PF00300	Histidine phosphatase superfamily (branch 1)	24	22	30	26	26	25	29	28	23	23	22	24	16	21	22	25	43	32	38
PF00301	Rubredoxin			1	1	2	3		1	2	1	1	1		1	1	1	2	1	1
PF00303	Thymidylate synthase	2	2	3	2	3	2	2	2	1	1	1	1	1	1	1	2	6	2	3
PF00304	Gamma-thionin family	18	12	18	23	18	11	12	20	14	17	17	15	15	12	16	11	19	32	16
PF00305	Lipoxygenase	23	19	16	14	13	15	14	13	20	13	16	17	14	15	15	23	17	18	16
PF00306	ATP synthase alpha/beta chain, C terminal domain			3	2	5									1		5	4		3
PF00307	Calponin homology (CH) domain	23	23	23	25	22	22	22	24	18	22	24	22	23	18	22	21	27	27	21
PF00310	Glutamine amidotransferases class-II	3	3	3	4	3	2	4	4	3	3	2	3	3	2	3	3	4	10	4
PF00311	Phosphoenolpyruvate carboxylase	9	13	8	8	8	8	11	8	11	10	8	9	6	9	11	15	9	8	7
PF00312	Ribosomal protein S15	4	3	11	5	9	5	6	4	5	4	4	4	4	5	4	8	9	6	5
PF00313	'Cold-shock' DNA-binding domain	2	1	4	3	3	2		1	2	3	2	3	2	2	3	3	2	2
PF00314	Thaumatin family	25	27	36	36	37	33	27	29	41	32	34	47	4	41	23	42	38	53	44
PF00316	Fructose-1-6-bisphosphatase, N-terminal domain	5	6	5	5	5	5	5	5	5	7	4	5	7	5	4	10	5	8	8
PF00317	Ribonucleotide reductase, all-alpha domain	2	2	3	1	2	2	3	2	3	3	3	3	1	3	3	2	3	2	4
PF00318	Ribosomal protein S2	6	6	8	11	10	6	6	7	6	8	6	4	6	6	6	12	13	12	9
PF00319	SRF-type transcription factor (DNA-binding and dimerisation domain)	9	9	75	73	67	51	50	50	70	64	75	73	38	61	64	96	90	98	85
PF00320	GATA zinc finger	29	29	30	34	34	27	30	26	31	33	31	35	27	31	29	38	47	51	35
PF00321	Plant thionin	3	1	1	3	3	4	1	4			1	2				13	4	1	9
PF00324	Amino acid permease	2	2	2	2	2	3	2	2	3	2	4	3	3	2	3	2	4	3	2
PF00326	Prolyl oligopeptidase family	13	17	16	17	15	15	14	15	13	14	15	16	16	15	12	22	23	25	24
PF00327	Ribosomal protein L30p/L7e	5	5	5	5	5	5	5	5	4	6	5	5	3	5	5	7	5	8	8
PF00328	Histidine phosphatase superfamily (branch 2)	4	4	3	3	3	3	3	2	3	3	3	2	3	2	2	5	3	6	3
PF00329	Respiratory-chain NADH dehydrogenase, 30 Kd subunit			2	4	7		1	1							1	3	5	1	2
PF00330	Aconitase family (aconitate hydratase)	6	6	7	9	7	7	6	8	6	6	8	7	4	6	6	9	6	6	8
PF00331	Glycosyl hydrolase family 10	13	13	12	16	14	11	12	14	14	8	14	14	13	11	12	17	17	17	13
PF00332	Glycosyl hydrolases family 17	46	53	55	60	69	64	56	66	62	58	62	71	52	65	59	104	91	83	74
PF00333	Ribosomal protein S5, N-terminal domain	4	4	4	4	4	4	4	4	4	4	4	4	4	3	3	6	4	6	4
PF00334	Nucleoside diphosphate kinase	5	6	5	5	5	6	5	5	4	4	6	5	5	5	5	11	7	7	7
PF00335	Tetraspanin family	11	10	14	15	15	10	13	14	15	16	14	15	12	12	17	21	20	17	19
PF00337	Galactoside-binding lectin	9	8	10	11	10	10	10	11	10	10	11	12	7	8	7	14	13	16	11
PF00338	Ribosomal protein S10p/S20e	3	3	5	4	5	5	5	4	4	3	4	5	5	4	4	8	4	6	4
PF00342	Phosphoglucose isomerase	2	3	3	3	3	3	3	3	3	3	3	3	4	3	3	8	3	5	3
PF00343	Carbohydrate phosphorylase	4	3	3	5	3	4	3	4	1	4	2	3	3	3	2	4	3	5	3
PF00344	SecY	4	5	4	5	6	5	6	5	9	12	11	11	4	10	9	11	6	8	5
PF00346	Respiratory-chain NADH dehydrogenase, 49 Kd subunit			3	2	4											4	4	1	7
PF00347	Ribosomal protein L6	7	6	8	8	8	8	8	8	7	6	6	6	6	7	7	12	8	7	10
PF00348	Polyprenyl synthetase	14	12	14	17	13	13	13	16	13	13	16	16	10	16	11	18	31	15	16
PF00349	Hexokinase	8	8	8	11	10	10	8	9	8	7	7	7	6	8	8	12	9	9	7
PF00350	Dynamin family	19	18	15	17	18	18	15	16	15	15	17	21	13	16	15	22	27	26	24
PF00352	Transcription factor TFIID (or TATA-binding protein, TBP)	8	8	10	8	8	9	8	8	10	8	8	8	4	10	6	5	6	8	16
PF00355	Rieske [2Fe-2S] domain	8	10	10	8	11	11	9	9	11	11	12	14	10	6	7	14	12	10	13
PF00360	Phytochrome region	5	6	3	4	4	4	3	4	3	3	3	3	3	4	3	5	3	4	8
PF00361	NADH:quinone oxidoreductase/Mrp antiporter, TM			11	15	23		4									9	12	3	10
PF00364	Biotin-requiring enzyme	10	10	11	11	12	12	11	11	13	12	13	13	10	14	11	26	13	16	18
PF00365	Phosphofructokinase	16	14	15	15	17	16	15	15	14	14	14	16	17	16	14	23	21	23	18
PF00366	Ribosomal protein S17	5	5	6	6	6	5	6	5	7	6	5	9	4	6	5	5	5	6	7
PF00368	Hydroxymethylglutaryl-coenzyme A reductase	3	4	3	3	3	3	3	3	3	3	3	3	2	4	2	3	3	3	5
PF00370	FGGY family of carbohydrate kinases, N-terminal domain	3	3	5	4	4	4	4	4	4	3	5	6	3	3	3	6	8	9	7
PF00373	FERM central domain	1	1	1	1	1	1	1	1	1	1	1	1	1	1	1	2	3	1	1
PF00378	Enoyl-CoA hydratase/isomerase	12	13	14	18	19	20	13	13	12	13	13	16	6	12	13	17	18	23	14
PF00380	Ribosomal protein S9/S16	4	4	5	6	5	4	4	5	4	4	4	5	1	4	4	4	5	4	4
PF00382	Transcription factor TFIIB repeat	12	12	12	12	16	10	6	8	12	10	11	9	7	12	12	13	15	12	12
PF00383	Cytidine and deoxycytidylate deaminase zinc-binding region	6	7	8	8	9	10	9	9	8	8	7	8	4	7	7	13	11	12	7
PF00384	Molybdopterin oxidoreductase	1	1	1	1	1	1	1	1	1	1	2	1	1	1	1	1	1	1	1
PF00385	Chromo (CHRromatin Organisation MOdifier) domain	11	7	14	28	14	14	13	16	10	13	12	14	7	11	9	8	11	10	11
PF00387	Phosphatidylinositol-specific phospholipase C, Y domain	5	4	6	6	6	6	5	6	5	4	4	5	2	5	5	6	5	14	10
PF00388	Phosphatidylinositol-specific phospholipase C, X domain	9	7	8	8	9	9	8	8	5	6	5	6	3	5	5	7	6	14	12
PF00389	D-isomer specific 2-hydroxyacid dehydrogenase, catalytic domain	17	19	16	17	15	15	13	17	14	13	16	15	10	12	16	20	15	23	16
PF00390	Malic enzyme, N-terminal domain	6	6	8	10	9	10	10	11	6	8	6	7	8	6	8	12	7	13	11
PF00391	PEP-utilising enzyme, mobile domain	2	2	2	2	2	2	2	2	2	2	2	1	1	2	2	5	10	7	6
PF00393	6-phosphogluconate dehydrogenase, C-terminal domain	1	1	3	3	4	2	2	3	3	3	4	2	1	4	3	3	4	9	3
PF00394	Multicopper oxidase	50	51	49	52	52	55	61	54	43	53	44	52	13	46	43	51	57	56	74
PF00396	Granulin	5	4	5	5	5	3	3	3	4	4	4	4	4	4	4	5	3	6	5
PF00397	WW domain	8	9	11	14	15	14	12	13	15	15	15	14	13	17	12	16	25	35	27
PF00398	Ribosomal RNA adenine dimethylase	4	6	5	3	5	4	4	3	4	4	5	4	2	4	4	4	6	9	6
PF00400	WD domain, G-beta repeat	496	503	734	740	755	728	705	742	653	702	716	754	644	705	660	1041	996	1011	936
PF00401	ATP synthase, Delta/Epsilon chain, long alpha-helix domain			2	2	4											6	4		1
PF00403	Heavy-metal-associated domain	81	77	88	84	85	79	79	78	78	93	79	93	69	86	83	97	121	102	82
PF00406	Adenylate kinase	8	8	11	10	11	11	10	10	11	10	10	10	10	11	10	26	13	15	18
PF00407	Pathogenesis-related protein Bet v 1 family	10	10	14	16	16	15	13	11	14	17	14	18	12	14	17	8	18	13	9
PF00408	Phosphoglucomutase/phosphomannomutase, C-terminal domain	1	1	1	1	1	1	1	1	1	1	1	1	1	1	1	1	2	1	1
PF00410	Ribosomal protein S8	7	7	7	8	12	7	8	7	6	8	7	10	5	6	8	7	11	6	7
PF00411	Ribosomal protein S11	5	4	6	6	10	5	4	5	8	7	6	7	5	8	7	11	11	7	10
PF00412	LIM domain	11	12	14	15	15	15	14	15	15	15	15	14	15	16	15	23	19	30	19
PF00413	Matrixin	4	2	4	5	4	2	2	4	4	5	3	3		3	5	6	6	4	5
PF00415	Regulator of chromosome condensation (RCC1) repeat	77	68	123	114	123	120	120	119	116	139	123	124	91	133	130	217	169	168	162
PF00416	Ribosomal protein S13/S18	3	3	5	3	4	3	3	3	3	4	3	3	2	3	3	5	4	3	5
PF00420	NADH-ubiquinone/plastoquinone oxidoreductase chain 4L			2	4	6											3	2	2	3
PF00421	Photosystem II protein			2	5	8				4			3	1	8		10	4	11	2
PF00425	chorismate binding enzyme	4	6	4	4	4	4	4	4	4	4	7	7	3	3	3	8	6	12	5
PF00428	60s Acidic ribosomal protein	8	10	7	8	10	8	6	8	8	10	10	12	7	8	10	14	9	9	7
PF00430	ATP synthase B/B' CF(0)	1	1	1	1	1	1		1	1		1	1	1	1	1	5	2	1	2
PF00432	Prenyltransferase alpha-alpha toroid domain	5	5	14	17	15	15	15	15	14	14	16	14	16	14	14	23	23	20	15
PF00433	Protein kinase C terminal domain	7	6	7	6	6	6	6	6	6	7	6	6	7	7	5	10	10	9	12
PF00436	Single-strand binding protein family	4	4	4	4	4	4	4	3	5	3	5	4	3	4	2	4	9	7	4
PF00438	S-adenosylmethionine synthetase, N-terminal domain	1	1	3	3	3	3	3	3	3	3	3	3	2	3	3	10	4	4	3
PF00439	Bromodomain	19	20	22	22	22	22	21	21	24	27	25	25	20	21	27	35	32	33	31
PF00441	Acyl-CoA dehydrogenase, C-terminal domain	6	8	8	8	9	7	13	8	6	8	7	8	6	9	7	14	7	14	11
PF00443	Ubiquitin carboxyl-terminal hydrolase	33	33	35	34	43	43	36	36	31	41	35	35	29	35	36	52	51	67	38
PF00444	Ribosomal protein L36	1	1	1	1	1	1		1	1	1		1	1			1	2	1	1
PF00445	Ribonuclease T2 family	11	11	13	9	11	10	13	8	8	10	10	8	3	8	11	9	15	8	8
PF00447	HSF-type DNA-binding	1	3	25	24	24	24	25	22	23	26	28	26	18	25	27	38	36	29	25
PF00448	SRP54-type protein, GTPase domain	9	10	8	9	8	7	9	9	8	7	8	9	7	8	8	12	13	11	8
PF00449	Urease alpha-subunit, N-terminal domain	1	1	1	1	1	1	1	2	1	1	1	1	1	1	1	1	3	2	2
PF00450	Serine carboxypeptidase	79	81	63	66	58	60	65	77	65	70	71	84	41	66	59	112	80	82	82
PF00453	Ribosomal protein L20	2	2	2	6	7	2	2	2	2	2	2	2	1	2	2	5	3	4	2
PF00454	Phosphatidylinositol 3- and 4-kinase	17	16	17	17	17	14	13	15	12	12	16	14	15	16	12	31	27	39	22
PF00456	Transketolase, thiamine diphosphate binding domain	2	2	3	4	2	2	3	4	3	2	2	3	2	3	2	2	4	9	5
PF00458	WHEP-TRS domain		1	1	1					1	1			1	1	1
PF00459	Inositol monophosphatase family	8	6	8	6	7	7	7	7	8	7	7	6	9	7	7	10	7	13	7
PF00462	Glutaredoxin	31	30	43	43	43	35	33	32	36	42	44	41	14	44	35	59	47	57	49
PF00463	Isocitrate lyase family	1	1	1	1	1		1	1	1	1	1	1	1	1	1	3	1	1	2
PF00464	Serine hydroxymethyltransferase	4	4	4	4	4	4	4	4	4	5	5	7	4	6	3	9	5	5	13
PF00466	Ribosomal protein L10	6	5	7	6	6	6	7	5	7	4	4	4	4	6	4	8	6	7	6
PF00467	KOW motif	8	8	10	9	9	9	9	10	9	9	11	11	5	9	8	11	8	11	8
PF00468	Ribosomal protein L34	1	1	2	2	2	2	2	2	2	2	2	2	2	2	2	2	2	3	2
PF00471	Ribosomal protein L33	1		1	4	6	1	1	1		1	1	1			1	4	6	1	1
PF00472	RF-1 domain	7	6	6	6	7	7	7	7	6	7	6	6	5	6	5	11	13	10	6
PF00474	Sodium:solute symporter family	1	1	1	2	1	1	2	1	1	1	1	1		1	1	1	2	3	1
PF00475	Imidazoleglycerol-phosphate dehydratase	1	1	1	1	1	1	1	1	1	1	1	2	1	1	1	3	3	1	1
PF00476	DNA polymerase family A	7	8	6	11	11	10	9	8	5	5	5	5	7	6	5	7	11	7	6
PF00477	Small hydrophilic plant seed protein	2	2	1	3	2	2	1	3	2	3	2	3		1	2	2	2	4	4
PF00478	IMP dehydrogenase / GMP reductase domain	3	3	1	3	2	2	2	2	4	2	3	3	1	3	1	2	3	3	2
PF00479	Glucose-6-phosphate dehydrogenase, NAD binding domain	6	6	7	5	6	6	7	5	5	5	5	6	4	5	5	9	7	10	10
PF00481	Protein phosphatase 2C	82	84	95	98	103	102	98	94	85	98	101	100	79	90	87	143	124	137	113
PF00483	Nucleotidyl transferase	10	11	12	12	12	13	12	10	11	11	9	12	11	12	8	25	14	20	23
PF00484	Carbonic anhydrase	6	4	4	3	4	4	4	4	2	5	3	3	2	4	4	9	7	11	7
PF00485	Phosphoribulokinase / Uridine kinase family	9	7	12	10	10	10	10	9	10	12	11	13	8	12	10	12	14	21	21
PF00487	Fatty acid desaturase	5	6	12	11	10	6	11	8	10	8	10	12	8	10	9	19	11	14	10
PF00488	MutS domain V	9	9	9	9	9	9	9	10	10	10	12	13	8	10	9	9	22	16	8
PF00490	Delta-aminolevulinic acid dehydratase	2	2	1	1	1	1	1	1	2	1	1	1	1	2	1	3	2	4	3
PF00491	Arginase family	2	2	1	1	2	3	1	1	1	1	1	1	1	1	1	1	4	1	3
PF00493	MCM P-loop domain	8	7	9	6	9	9	8	9	11	10	10	11	8	12	8	11	18	14	8
PF00494	Squalene/phytoene synthase	5	5	5	5	6	6	5	5	6	5	5	5	4	5	3	10	9	7	9
PF00497	Bacterial extracellular solute-binding proteins, family 3	12	11	17	12	20	17	15	13	15	18	17	20	12	16	17	30	22	38	19
PF00498	FHA domain	14	14	19	18	16	15	16	18	14	19	19	20	16	17	20	25	33	26	23
PF00499	NADH-ubiquinone/plastoquinone oxidoreductase chain 6			3	4	5											3	4	4	2
PF00501	AMP-binding enzyme	55	60	57	63	55	56	55	49	54	58	53	65	40	53	56	78	77	97	65
PF00503	G-protein alpha subunit	4	4	5	4	4	4	4	4	5	5	4	6	2	5	5	8	7	6	8
PF00504	Chlorophyll A-B binding protein	20	18	22	22	25	21	15	19	26	23	22	22	19	24	22	31	26	25	26
PF00505	HMG (high mobility group) box	11	14	13	12	15	13	13	13	14	17	20	20	12	12	17	19	23	20	16
PF00507	NADH-ubiquinone/plastoquinone oxidoreductase, chain 3			2	4	5											3	2	3	2
PF00510	Cytochrome c oxidase subunit III			2	1	1			1									2		1
PF00512	His Kinase A (phospho-acceptor) domain	11	13	13	11	12	12	12	12	12	11	12	13	11	13	13	22	13	20	22
PF00514	Armadillo/beta-catenin-like repeat	77	73	84	95	97	90	95	98	84	97	88	102	64	89	97	147	139	112	107
PF00515	Tetratricopeptide repeat	21	23	22	31	29	23	21	26	16	18	19	20	19	21	14	33	35	32	41
PF00520	Ion transport protein	13	12	25	23	25	26	24	26	22	26	26	24	22	23	23	37	43	36	27
PF00521	DNA gyrase/topoisomerase IV, subunit A	2	2	2	2	2	2	3	2	2	2	4	5	2	1	1	1	3	4	4
PF00533	BRCA1 C Terminus (BRCT) domain	14	17	21	13	19	18	15	15	14	15	13	13	17	18	14	16	19	37	12
PF00534	Glycosyl transferases group 1	26	25	37	35	34	34	35	33	35	35	35	35	31	37	34	67	43	57	47
PF00535	Glycosyl transferase family 2	6	5	3	3	4	3	3	2	3	2	3	4	2			3	4	2	4
PF00536	SAM domain (Sterile alpha motif)	6	3	7	11	9	9	8	11	7	7	9	8	6	9	7	10	11	10	9
PF00538	linker histone H1 and H5 family	10	10	12	13	13	12	12	11	13	14	13	13	13	13	13	18	14	14	14
PF00542	Ribosomal protein L7/L12 C-terminal domain	3	3	6	7	6	7	6	6	5	5	4	5		5	5	6	6	6	6
PF00543	Nitrogen regulatory protein P-II		1	1	1	1	1	1	1	1	1	1	1	1	1	1	2	1	2	3
PF00544	Pectate lyase	9	7	10	8	9	10	8	7	9	12	8	13	8	11	10	13	13	12	9
PF00547	Urease, gamma subunit	1	1	1	1	1	1	1	1	1	1	1	1	1	1	1	1	3	2	2
PF00549	CoA-ligase	3	2	3	4	3	4	4	3	3	3	4	4	3	3	5	6	4	4	6
PF00550	Phosphopantetheine attachment site	12	12	11	11	11	11	11	11	12	11	11	11	10	11	9	13	13	11	11
PF00551	Formyl transferase	2	3	3	4	3	3	3	4	3	3	3	4	3	3	3	8	6	4	5
PF00557	Metallopeptidase family M24	13	13	14	13	14	15	14	14	14	14	13	14	12	15	11	23	16	30	24
PF00560	Leucine Rich Repeat	772	776	1190	1273	1326	1117	994	991	883	751	921	1324	810	1153	1005	2503	1829	2028	2095
PF00561	alpha/beta hydrolase fold	41	42	48	47	51	46	51	47	39	49	43	52	33	37	35	64	61	72	60
PF00562	RNA polymerase Rpb2, domain 6	10	10	7	9	11	7	6	8	7	6	14	7	9	9	6	9	13	12	10
PF00564	PB1 domain	26	25	36	40	37	34	34	36	36	36	34	38	22	36	32	42	44	43	49
PF00565	Staphylococcal nuclease homologue	13	7	13	13	12	13	13	13	11	11	12	14	11	13	9	19	13	16	20
PF00566	Rab-GTPase-TBC domain	16	16	22	20	21	21	20	21	20	22	18	22	20	21	19	36	38	31	28
PF00567	Tudor domain	2	1	3	2	2	2	3	2	2	2	2	2	2	2	1	3	2	2	3
PF00569	Zinc finger, ZZ type	5	6	8	8	9	10	9	8	6	10	7	8	10	6	9	15	15	16	14
PF00570	HRDC domain	4	5	6	5	5	6	5	5	5	5	1	5	4	5	4	5	7	11	7
PF00571	CBS domain	58	52	66	66	70	68	68	69	61	60	64	57	65	63	55	101	93	93	91
PF00572	Ribosomal protein L13	5	6	4	4	4	4	4	4	4	5	5	6	3	5	5	13	4	4	6
PF00573	Ribosomal protein L4/L1 family	5	4	5	5	5	5	5	5	5	5	6	10	5	4	5	5	8	9	7
PF00574	Clp protease	7	7	10	11	15	9	10	9	10	10	11	11	9	10	10	19	16	13	18
PF00575	S1 RNA binding domain	17	16	18	18	19	18	18	18	19	13	12	11	17	21	15	24	20	18	21
PF00576	HIUase/Transthyretin family	1	1	2	1	1	1	2	1	1	1	1	1	1	1	1	4	2	1	3
PF00578	AhpC/TSA family	4	4	4	4	4	3	4	4	5	3	5	4	4	3	5	9	9	6	5
PF00579	tRNA synthetases class I (W and Y)	9	7	7	9	11	11	6	11	7	10	8	8	14	9	10	14	7	14	7
PF00580	UvrD/REP helicase N-terminal domain	1	1	1	3	2	2	2	2	1	2	2	2	1	2	2	1	1	3	3
PF00581	Rhodanese-like domain	17	20	24	23	26	24	22	22	22	21	21	24	18	23	20	33	27	32	36
PF00582	Universal stress protein family	31	33	46	36	36	32	35	38	35	37	35	36	36	33	33	57	48	54	42
PF00583	Acetyltransferase (GNAT) family	19	26	31	28	30	29	30	29	30	26	26	32	19	28	29	33	45	44	35
PF00584	SecE/Sec61-gamma subunits of protein translocation complex	3	1	3	3	3	3	2	1	3	3	3	3	3	3	3	3	4	3	3
PF00585	C-terminal regulatory domain of Threonine dehydratase	2	2	2	2	2	2	2	2	2	2	2	2	2	2	2	2	2	2	2
PF00586	AIR synthase related protein, N-terminal domain	1	1	1	1	1	1	1	1	2	1	1	2	1	2	1	1	1	3	1
PF00587	tRNA synthetase class II core domain (G, H, P, S and T)	10	8	12	10	10	10	11	10	13	8	9	15	10	10	10	14	12	11	10
PF00588	SpoU rRNA Methylase family	4	6	6	6	6	7	5	6	5	5	4	5	4	4	6	7	11	13	6
PF00590	Tetrapyrrole (Corrin/Porphyrin) Methylases	3	3	3	3	3	3	3	3	3	4	4	6	2	3	4	5	5	4	4
PF00591	Glycosyl transferase family, a/b domain	1	1	1	1	1	1	1	1	1	2		1		1	1	2	1	3	1
PF00595	PDZ domain	5		4	3	4	2	2	4		3	1				4	1	2	6	4
PF00596	Class II Aldolase and Adducin N-terminal domain	2	2	2	2	2	2		2	1	2	2	2	1	1	2	1	3	1	3
PF00609	Diacylglycerol kinase accessory domain	8	8	9	7	9	8	8	8	8	8	8	7	8	8	8	13	19	9	12
PF00610	Domain found in Dishevelled, Egl-10, and Pleckstrin (DEP)	2	2	2	2	2	2	2	2	1	2	2	2	2	2	2	4	2	6	3
PF00612	IQ calmodulin-binding motif	74	64	107	97	105	91	97	102	90	94	102	100	92	101	84	120	137	173	116
PF00613	Phosphoinositide 3-kinase family, accessory domain (PIK domain)	3	3	3	2	3	2	2	2	4	3	5	4	3	3	4	5	3	1	5
PF00614	Phospholipase D Active site motif	16	17	22	23	17	19	24	22	23	20	19	21	20	19	19	29	31	25	19
PF00615	Regulator of G protein signaling domain			1		1			1											1
PF00620	RhoGAP domain	10	9	12	12	12	12	11	12	12	12	13	12	10	13	11	18	14	19	13
PF00622	SPRY domain	4	5	4	5	4	4	5	4	4	4	4	5	3	3	5	3	5	6	3
PF00623	RNA polymerase Rpb1, domain 2	6	6	11	12	11	6	5	10	10	8	8	12	6	11	11	7	10	17	10
PF00625	Guanylate kinase	2	2	2	5	2	2	2	3	2	2	2	3	2	2	2	3	5	5	2
PF00626	Gelsolin repeat	28	26	36	35	38	36	36	35	38	36	37	36	32	36	34	40	59	59	35
PF00627	UBA/TS-N domain	21	22	23	23	24	24	23	24	24	24	24	24	21	23	24	41	32	44	33
PF00628	PHD-finger	37	35	57	61	69	63	59	64	54	58	63	65	50	59	58	70	108	96	69
PF00630	Filamin/ABP280 repeat	1	1	2	2	2	2	2	2	2	2	1	2	1	2	2	4	6	13	2
PF00631	GGL domain	1	1	2	2	2	2	2	1	1	1	1	2	1	1	1	1	2	2	1
PF00632	HECT-domain (ubiquitin-transferase)	10	11	15	10	11	11	13	11	9	11	10	8	11	8	12	11	21	13	11
PF00633	Helix-hairpin-helix motif	1	1	2	1	1	1	2	1	1	1	1	1	1	1	1	1	4	2	2
PF00634	BRCA2 repeat	3	3	6	6	5	5	6	6	5		6	5	3	4	6	6	5		4
PF00635	MSP (Major sperm protein) domain	15	15	15	17	17	16	16	17	17	18	19	25	25	16	17	22	37	25	20
PF00636	Ribonuclease III domain	5	6	16	16	16	16	14	16	8	14	14	16	15	15	14	25	26	29	17
PF00637	Region in Clathrin and VPS	9	10	18	18	18	18	18	18	17	10	10	12	18	17	17	22	19	19	21
PF00638	RanBP1 domain	3	3	5	5	5	5	4	5	5	5	5	6	4	6	4	5	6	5	5
PF00639	PPIC-type PPIASE domain	2	3	3	3	3	3	3	3	2	3	3	3	2	2	3	1	3	3	2
PF00641	Zn-finger in Ran binding protein and others	13	13	25	29	28	26	25	28	24	24	26	28	24	29	26	81	44	44	40
PF00642	Zinc finger C-x8-C-x5-C-x3-H type (and similar)	44	42	83	82	87	86	72	79	78	81	85	82	62	78	72	159	140	138	98
PF00643	B-box zinc finger	24	25	22	22	27	25	25	21	26	23	25	24	23	26	24	35	27	36	25
PF00644	Poly(ADP-ribose) polymerase catalytic domain	5	7	4	5	7	6	6	5	6	4	5	5	5	6	2	5	5	11	5
PF00645	Poly(ADP-ribose) polymerase and DNA-Ligase Zn-finger region	5	5	5	5	5	5	5	5	5	4	5	4	8	7	2	3	5	9	3
PF00646	F-box domain	345	303	223	374	285	227	153	298	199	349	396	448	128	209	378	467	278	490	374
PF00647	Elongation factor 1 gamma, conserved domain	2	1	2	2	2	2	2	2	2	2	2	2	2	2	2	7	3	2	3
PF00648	Calpain family cysteine protease	1	1	1	1	1	1	1	1	1	1	1	1		1	1	1	2	2	1
PF00650	CRAL/TRIO domain	27	23	34	33	33	34	30	31	30	27	30	32	28	31	28	50	51	62	44
PF00651	BTB/POZ domain	186	162	57	76	73	53	61	66	50	62	56	55	52	106	149	169	120	208	146
PF00652	Ricin-type beta-trefoil lectin domain	2	2	2	2	2	2	2	2		4	4	4			4		14	3
PF00654	Voltage gated chloride channel	13	14	11	10	11	12	11	11	10	11	11	9	11	11	9	15	22	11	17
PF00656	Caspase domain	11	13	15	14	10	13	12	13	10	13	13	16	12	11	10	8	14	19	14
PF00657	GDSL-like Lipase/Acylhydrolase	147	150	160	149	160	151	152	155	131	153	145	156	97	132	149	157	147	161	150
PF00658	MLLE domain	3	4	4	4	4	4	4	4	4	4	3	5	4	4	4	7	4	8	3
PF00662	NADH-Ubiquinone oxidoreductase (complex I), chain 5 N-terminus			1	4	2											1	1		2
PF00664	ABC transporter transmembrane region	87	103	117	117	114	108	96	107	90	94	105	108	87	98	92	89	144	124	109
PF00665	Integrase core domain	8	9	40	64	64	13	4	32	40	46	44	30	2	50	57	14		1
PF00667	FAD binding domain	5	4	4	4	4	4	4	4	5	3	4	4	5	4	4	4	5	4	6
PF00670	S-adenosyl-L-homocysteine hydrolase, NAD binding domain	2	2	2	2	2	2	2	3	2	2	2	4	1	2	2	2	2	2	3
PF00673	ribosomal L5P family C-terminus	3	3	4	3	4	4	5	4	4	5	3	4	4	4	4	6	4	6	3
PF00675	Insulinase (Peptidase family M16)	12	11	13	11	12	11	14	12	12	9	12	12	8	12	12	18	15	19	21
PF00676	Dehydrogenase E1 component	6	6	7	6	7	7	7	6	7	6	6	6	8	6	5	15	10	11	13
PF00677	Lumazine binding domain		2	2	2	2	2	2	2		2	2	2	2	4		4	2	4	2
PF00679	Elongation factor G C-terminus	9	13	11	14	11	11	10	11	13	12	14	14	10	13	11	15	21	17	15
PF00682	HMGL-like	5	5	7	6	7	7	7	7	5	8	7	9	4	6	8	10	5	4	11
PF00684	DnaJ central domain	8	9	10	9	9	9	9	9	10	9	10	10	9	10	10	14	11	12	11
PF00685	Sulfotransferase domain	22	20	27	25	36	14	8	6	31	33	28	37	11	29	31	45	26	25	27
PF00686	Starch binding domain	5	5	6	7	7	7	6	6	8	9	6	7	4	8	7	13	8	9	9
PF00687	Ribosomal protein L1p/L10e family	8	6	8	8	8	7	9	8	7	7	6	8	6	6	6	14	8	10	9
PF00689	Cation transporting ATPase, C-terminus	17	20	18	16	18	19	17	16	19	16	14	17	12	16	15	19	30	22	21
PF00690	Cation transporter/ATPase, N-terminus	24	24	25	24	25	26	24	25	31	28	24	27	24	28	28	26	39	58	33
PF00692	dUTPase	1	1	1	1	1	1	1	1	1	1	1	1	1	1	1	1	2	1	1
PF00694	Aconitase C-terminal domain	4	4	6	6	5	5	4	6	5	4	5	5	4	5	5	5	5	5	7
PF00696	Amino acid kinase family	10	10	15	14	14	14	12	15	14	14	13	17	12	14	12	26	18	23	23
PF00697	N-(5'phosphoribosyl)anthranilate (PRA) isomerase	1	2	2	2	3	4	2	3	1	1	2	2	2	2	2	2	2	2	4
PF00698	Acyl transferase domain	1	1	1	1	1	1		1	5	2	2	2	1	2	1	1	1	1	1
PF00699	Urease beta subunit	1	1	1	1	1	1	1	2	1	1	1	1	1	1	1	1	3	2	2
PF00701	Dihydrodipicolinate synthetase family	2	3	3	3	3	3	3	3	2	3	2	2	2	2	3	2	3	3	4
PF00702	haloacid dehalogenase-like hydrolase	51	50	62	55	55	54	59	58	56	56	56	60	54	56	54	68	85	89	75
PF00703	Glycosyl hydrolases family 2	2	2	2	2	2	2	2	2	3	2	1	2	2	2	2	2	3	5	3
PF00704	Glycosyl hydrolases family 18	20	19	22	23	19	19	16	16	19	22	25	30	9	21	17	36	23	28	25
PF00705	Proliferating cell nuclear antigen, N-terminal domain	1	2	9	3	1	1	7	7	5	10	8	4	3	6	9	1	1	4	1
PF00707	Translation initiation factor IF-3, C-terminal domain	1	1	2		1	1	1	1	1	1	1	1	1	1	1	1	2	6	3
PF00708	Acylphosphatase	2	2	1	2	2	1	1	2	1	2	2	2		1	2	2	2	2	2
PF00709	Adenylosuccinate synthetase	2	2	2	2	2	2	2	2	2	3	2	2	2	2	3	3	3	2	2
PF00717	Peptidase S24-like	1	2	4	2	3	3	3	3	2	3	4	3	2	3	3	4	2	5	3
PF00719	Inorganic pyrophosphatase	8	10	10	6	9	8	8	8	7	7	8	10	6	8	6	16	10	11	15
PF00722	Glycosyl hydrolases family 16	34	34	35	34	37	31	29	31	41	39	36	34	28	38	38	39	40	39	36
PF00724	NADH:flavin oxidoreductase / NADH oxidase family	17	18	20	19	27	14	11	11	17	12	14	22	6	19	11	15	15	17	19
PF00725	3-hydroxyacyl-CoA dehydrogenase, C-terminal domain	6	5	7	8	9	10	7	7	6	6	6	7	3	6	6	8	10	9	8
PF00728	Glycosyl hydrolase family 20, catalytic domain	5	5	5	5	5	5	7	8	7	6	6	6	4	8	6	8	7	8	6
PF00730	HhH-GPD superfamily base excision DNA repair protein	5	4	7	7	7	6	6	6	4	6	6	7	4	6	7	10	16	14	12
PF00731	AIR carboxylase	1	1	1	1	1	1	1	1	1	1	1	1	1	1	1	4	1	1	1
PF00732	GMC oxidoreductase	11	11	11	11	11	11	10	12	10	10	10	12	8	10	10	12	12	15	11
PF00733	Asparagine synthase	4	3	4	4	4	4	4	4	4	4	4	4	4	4	4	6	3	7	10
PF00736	EF-1 guanine nucleotide exchange domain	3	3	2	2	2	2	3	3	3	2	4	3	2	3	3	3	3	5	2
PF00737	Photosystem II 10 kDa phosphoprotein			1	2	5											4	2	4	1
PF00742	Homoserine dehydrogenase	4	2	4	3	4	4	4	4	5	4	5	5	3	4	4	8	4	3	4
PF00743	Flavin-binding monooxygenase-like	49	45	36	47	39	36	36	40	26	31	27	30	30	27	32	44	34	50	45
PF00745	Glutamyl-tRNAGlu reductase, dimerisation domain	1	2	2	1	2	2	2	1	2	1	2	1	1	2	1	1	1	2	1
PF00749	tRNA synthetases class I (E and Q), catalytic domain	6	7	5	6	5	5	6	7	7	5	6	6	4	8	6	6	7	7	7
PF00750	tRNA synthetases class I (R), catalytic domain	2	2	1	2	1	1	1	4	3	4	3	2	2	2	4	3	2	3	1
PF00752	XPG N-terminal domain	8	8	8	6	7	7	9	6	8	10	7	8	7	6	7	5	8	11	7
PF00753	Metallo-beta-lactamase superfamily	4	4	6	5	6	6	6	6	4	6	6	6	5	6	5	7	7	8	8
PF00754	F5/8 type C domain	1	1	1	1	1		1	1	1	1	1			2	1	2	1	1	1
PF00756	Putative esterase	2	3	1	1	1	1	1	1	1	1	1	1	1	1	1	3	1	1	2
PF00759	Glycosyl hydrolase family 9	27	28	25	24	26	26	24	29	30	27	32	30	21	33	24	28	25	28	27
PF00762	Ferrochelatase	3	3	2	2	2	2	2	1	2	2	2	2	3	2	1	7	2	18	6
PF00763	Tetrahydrofolate dehydrogenase/cyclohydrolase, catalytic domain	3	3	3	3	3	3	3	3	3	3	3	3	2	3	3	4	4	4	3
PF00764	Arginosuccinate synthase N-terminal HUP domain		1	1	1	1	1	1	1	1	1	2	1	2	1	1	1	3	2	1
PF00766	Electron transfer flavoprotein FAD-binding domain			1	2	1	1	1	1	1	1	1	1				1	1	2	1
PF00773	RNB domain	3	2	3	3	3	3	3	3	3	4	2	3	3	3	2	5	5	4	4
PF00777	Glycosyltransferase family 29 (sialyltransferase)	7	5	7	6	8	6	7	5	3	8	4	9	2	5	6	5	8	11	8
PF00780	CNH domain	1	1	1	2	2	2	1	2	2	2	2	1	1	2	2	4	2	2	4
PF00781	Diacylglycerol kinase catalytic domain	12	12	15	13	15	14	15	14	16	16	15	14	15	15	15	22	34	23	19
PF00782	Dual specificity phosphatase, catalytic domain	10	11	17	18	17	18	18	26	15	16	13	16	16	15	18	34	23	27	26
PF00784	MyTH4 domain	1	1	1	1	1	1	1	1	1	1	1	1	1	1	1	2	3	1	1
PF00786	P21-Rho-binding domain	14	14	14	13	13	13	13	13	12	13	11	14	11	15	10	15	15	19	11
PF00787	PX domain	5	4	8	8	8	8	8	8	8	9	7	8	7	8	7	10	11	13	11
PF00789	UBX domain	8	8	9	10	10	9	9	9	8	8	9	9	9	8	9	16	11	13	11
PF00790	VHS domain	10	10	10	11	10	10	10	14	10	11	9	10	7	8	10	16	12	18	11
PF00792	Phosphoinositide 3-kinase C2	2	2	2	1	2	2	1	1	3	2	3	3	1	2	3	4	2		3
PF00793	DAHP synthetase I family	1	1	1	1	1	1	1	2	1	1	1	1	1	1	1	3	1	1	1
PF00795	Carbon-nitrogen hydrolase	9	8	9	8	8	8	9	9	9	9	11	11	8	9	10	12	10	16	10
PF00796	Photosystem I reaction centre subunit VIII																			2
PF00800	Prephenate dehydratase	3	3	5	5	5	5	5	5	5	5	6	4	2	5	6	11	6	4	10
PF00804	Syntaxin	11	9	8	9	8	8	11	12	7	9	8	9	7	9	6	7	9	10	10
PF00805	Pentapeptide repeats (8 copies)	5	5	7	8	7	7	7	4	7	8	5	6	8	7	5	14	10	7	7
PF00806	Pumilio-family RNA binding repeat	73	81	104	96	100	97	113	95	68	83	84	87	90	85	82	138	126	114	87
PF00808	Histone-like transcription factor (CBF/NF-Y) and archaeal histone	13	12	24	22	22	19	21	19	20	17	22	20	10	18	13	23	29	27	23
PF00809	Pterin binding enzyme	1	1	3	2	2	3	3	2	2	1	1	2		1	1	3	2	5	3
PF00810	ER lumen protein retaining receptor	5	3	5	5	4	5	5	5	3	4	4	4	4	4	4	8	7	4	6
PF00814	tRNA N6-adenosine threonylcarbamoyltransferase	2	3	2	2	2	2	2	2	2	2	2	2	3	2	2	6	5	3	3
PF00815	Histidinol dehydrogenase	2	2	1	1	1	1	1	1	1	1	1	1	1	1	1	1	3	4	1
PF00817	impB/mucB/samB family	3	2	3	3	4	4	3	3	3	3	3	3	4	3	3	10	8	8	4
PF00827	Ribosomal L15	2	2	2	1	2	2	2	1	3	2	2	2	2	4	2	4	2	2	3
PF00828	Ribosomal proteins 50S-L15, 50S-L18e, 60S-L27A	3	2	4	4	4	4	4	4	4	2	5	4	2	4	4	6	5	5	4
PF00829	Ribosomal prokaryotic L21 protein	2	2	2	2	2	2	2	2	2	2	2	2	2	2	2	2	2	2	2
PF00830	Ribosomal L28 family	2	1	3	3	3	3	3	3	1	2	2	2	1	2	2	4	2	2	2
PF00831	Ribosomal L29 protein	3	3	3	3	3	3	3	3	3	3	3	4	3	4	1	3	3	3	4
PF00832	Ribosomal L39 protein	2	2	2		2	1	1	1	2	2	3	2		2	2	2	2	2	4
PF00833	Ribosomal S17			2	2	2	1	1	1	1	1	1	2		2	1	2	1	1	2
PF00834	Ribulose-phosphate 3 epimerase family	3	2	2	2	2	2	2	3	5	3	2	2	3	6	2	2	4	5	2
PF00838	Translationally controlled tumour protein	1	1	1	1	1	1	1	1	1	2	2	3	1	1	2	2	1	2	3
PF00847	AP2 domain	130	132	199	194	175	159	139	161	177	178	197	209	61	175	186	207	228	243	202
PF00848	Ring hydroxylating alpha subunit (catalytic domain)	2	1	1	1	1	1	1	1	1	1	1	1	1	1	1	1	2	1	3
PF00849	RNA pseudouridylate synthase	4	5	9	8	8	8	8	8	7	9	5	8	7	7	7	13	15	18	9
PF00850	Histone deacetylase domain	15	13	13	16	15	13	14	13	12	13	12	13	11	14	12	24	18	14	25
PF00852	Glycosyltransferase family 10 (fucosyltransferase) C-term		2	2	2	2	2	2	2	2	2	2	2	1	2	3	3	2	2	2
PF00854	POT family	99	90	105	107	99	98	105	100	84	77	93	109	33	95	80	129	135	144	119
PF00855	PWWP domain	10	10	15	13	16	16	16	15	12	12	13	13	12	11	12	21	26	22	22
PF00856	SET domain	30	31	46	48	47	44	42	45	38	40	37	34	28	39	40	46	65	80	56
PF00857	Isochorismatase domain	3	4	5	4	6	7	3	5	5	3	2	4	3	5	3	4	4	5	6
PF00860	Permease family	17	16	17	15	14	14	15	15	14	17	15	18	11	14	13	31	23	29	20
PF00861	Ribosomal L18 of archaea, bacteria, mitoch. and chloroplast	5	4	8	7	7	7	8	7	5	5	6	6	6	4	5	18	14	9	12
PF00862	Sucrose synthase first GT-B domain	9	9	11	8	10	11	12	11	12	10	15	9	8	9	12	30	15	19	18
PF00867	XPG I-region	7	6	8	6	7	7	8	7	8	9	7	10	8	6	7	5	10	13	7
PF00872	Transposase, Mutator family					1							1		1	1				1
PF00875	DNA photolyase	8	9	8	8	8	8	9	9	8	10	10	9	8	8	9	18	10	15	12
PF00881	Nitroreductase family				1				1
PF00883	Cytosol aminopeptidase family, catalytic domain	2	4	3	2	2	2	2	2	2	2	2	2	1	2	1	2	2	4	4
PF00885	6,7-dimethyl-8-ribityllumazine synthase	1	1	1	2	2	2	1	2	1	1	1	1		1	1	1	1	2	1
PF00886	Ribosomal protein S16	2	2	2	2	2	2	2	2	5	2	2	2	2	5	3	2	4	2	5
PF00887	Acyl CoA binding protein	3	3	5	6	5	5	5	6	5	4	6	6	5	4	4	8	5	6	13
PF00888	Cullin family	9	8	10	10	11	12	11	12	15	12	13	13	7	12	12	17	12	9	9
PF00889	Elongation factor TS	4	4	4	4	4	4	4	4	6	5	5	6	4	8	2	4	5	5	6
PF00890	FAD binding domain	9	9	11	7	11	10	8	10	8	7	8	9	4	6	8	7	8	11	5
PF00891	O-methyltransferase domain	50	44	35	33	50	47	45	50	29	53	41	41	24	30	51	45	37	54	42
PF00892	EamA-like transporter family	92	91	119	132	118	109	125	127	90	93	99	106	68	93	93	117	129	154	111
PF00899	ThiF family	21	19	21	20	20	20	20	22	20	16	18	17	18	19	17	42	31	26	24
PF00900	Ribosomal family S4e	3	3	2	2	3	2	2	2	2	3	4	4	2	3	3	3	2	4	2
PF00902	Sec-independent protein translocase protein (TatC)	1	1	5	2	2	1	1	1	1	1	1	1	1	1	1	3	2	1	4
PF00903	Glyoxalase/Bleomycin resistance protein/Dioxygenase superfamily	15	15	15	17	19	19	16	17	18	17	18	20	10	20	15	24	19	39	25
PF00909	Ammonium Transporter Family	9	10	13	13	11	12	11	10	9	11	8	10	2	8	8	14	10	9	8
PF00916	Sulfate permease family	12	12	12	12	11	11	10	11	12	10	11	12	11	12	12	24	20	24	17
PF00917	MATH domain	45	46	22	26	27	24	19	25	17	30	26	26	15	31	38	45	28	84	38
PF00919	Uncharacterized protein family UPF0004	1	1	2	2	2	2	2	2	2	2	2	2	1	2	2	2	2	2	2
PF00920	Dihydroxy-acid/6-phosphogluconate dehydratase N-terminal	1	1	1	1	1	1	1	1	1	1	1	1	2	1	1	1	1	1	1
PF00923	Transaldolase/Fructose-6-phosphate aldolase	2		2	2	2	2	2	2	2	2	2	2	2	2	2	5	3	4	2
PF00924	Mechanosensitive ion channel, beta-domain	7	7	8	7	7	7	8	7	7	6	5	6	6	7	7	7	13	10	10
PF00925	GTP cyclohydrolase II	3	3	4	5	4	4	4	5	3	3	3	3	3	3	3	5	3	5	3
PF00926	3,4-dihydroxy-2-butanone 4-phosphate synthase	3	3	4	4	4	4	4	4	3	3	3	3	3	3	3	5	3	5	3
PF00928	Adaptor complexes medium subunit family	8	7	7	7	7	7	7	7	7	9	6	7	7	9	6	20	9	8	11
PF00929	Exonuclease	14	14	14	13	18	18	14	13	12	17	17	17	10	15	14	20	23	28	18
PF00930	Dipeptidyl peptidase IV (DPP IV) N-terminal region	1	1	1	1	1	1	2	1	1	2	2	4	2	2	1	1	1	1	2
PF00931	NB-ARC domain	212	157	252	306	294	252	184	265	194	191	219	317	138	140	167	572	342	567	447
PF00933	Glycosyl hydrolase family 3 N terminal domain	23	25	21	21	18	20	22	21	15	19	20	21	15	17	19	31	27	22	30
PF00935	Ribosomal protein L44	3	4	4	3	3	3	4	3	2	2	2	2	4	2	2	5	2	3	2
PF00939	Sodium:sulfate symporter transmembrane region	7	7	8	6	8	7	7	7	6	7	6	8	5	6	7	5	7	8	6
PF00940	DNA-dependent RNA polymerase	2	3	2	3	2	2	2	2	2	2	2	2	3	2	2	3	3	2	3
PF00941	FAD binding domain in molybdopterin dehydrogenase	10	6	9	13	8	11	9	11	8	9	9	9	7	10	5	8	21	17	10
PF00953	Glycosyl transferase family 4	1		2	2	2	2	2	2	2	2	2	2	2	2	2	3	5	3	2
PF00954	S-locus glycoprotein domain	39	43	60	52	66	56	47	47	42	40	41	45	42	51	37	117	116	97	69
PF00955	HCO3- transporter integral membrane domain	10	8	9	9	9	6	9	9	7	9	9	9	9	7	9	12	15	24	12
PF00956	Nucleosome assembly protein (NAP)	5	5	5	5	6	5	5	5	5	5	5	5	5	4	5	12	5	5	4
PF00957	Synaptobrevin	12	11	13	12	12	12	13	14	12	13	13	13	13	12	10	20	13	20	16
PF00958	GMP synthase C terminal domain	1	1	1	1	1	1	1	1	1	2	1	1	1	1	1	1	1	2	1
PF00962	Adenosine deaminase	1	1	1	1	1	1	1	1	1	1	1	1	1	1	1	1	2	1	1
PF00967	Barwin family	6	6	4	8	6	7	4	6	4	4	5	14	3	3	7	4	7	5	7
PF00970	Oxidoreductase FAD-binding domain	6	7	9	8	7	7	8	8	7	6	9	8	7	7	9	8	8	6	7
PF00977	Histidine biosynthesis protein	2	1	2	3	2	2	2	2	2	3	2	1	1	2	3	3	3	4	2
PF00982	Glycosyltransferase family 20	8	7	12	12	11	11	13	13	12	11	12	16	9	11	15	20	11	13	16
PF00984	UDP-glucose/GDP-mannose dehydrogenase family, central domain	2	4	5	4	5	5	4	3	5	4	4	3	3	6	4	9	8	8	6
PF00986	DNA gyrase B subunit, carboxyl terminus	1	1	1	1	1	1	1	1	1	1	1	1	1	1	1	1	2	1
PF00988	Carbamoyl-phosphate synthase small chain, CPSase domain	1		1	1	1	1	1	1	1	1	1	1	1	1	1	3	1	1	1
PF00989	PAS fold	10	11	9	10	12	11	9	9	7	8	8	9	8	9	8	14	11	10	19
PF00994	Probable molybdopterin binding domain	1	3	3	4	3	3	3	4	3	3	3	3	3	3	3	7	3	3	4
PF00995	Sec1 family	9	9	8	4	5	5	9	5	6	5	7	10	7	6	6	16	28	17	10
PF00996	GDP dissociation inhibitor	12	13	5	7	7	7	7	6	10	7	6	7	6	9	7	8	16	8	8
PF00999	Sodium/hydrogen exchanger, transmembrane	29	30	32	30	39	27	26	24	33	32	29	34	16	38	22	39	34	35	39
PF01000	RNA polymerase Rpb3/RpoA insert domain	3	3	3	5	8	3	3	3	2	1	2	2	2	3	1	8	6	3	7
PF01008	Initiation factor 2 subunit family	6	5	5	5	5	5	5	5	5	5	6	4	5	5	5	8	8	12	6
PF01010	NADH-dehyrogenase subunit F, TMs, (complex I) C-terminus			1		3											1	3		2
PF01011	Glucose/ethanol/alcohol dehydrogenase, beta-propeller domain	1		1	1	1	1	1	1	1	1	1	1	1	1	1			6	1
PF01012	Electron transfer flavoprotein domain	2	1	2	3	2	2	2	2	2	2	4	5	1	1	1	2	2	4	4
PF01014	Uricase	2	2	2	2	2	2	2	2	2	2	2	3	2	2		4	4	3	2
PF01015	Ribosomal S3Ae family	3	3	4	3	3	3	3	3	5	4	3	3	3	4	4	3	4	7	2
PF01016	Ribosomal L27 protein	3	2	3	3	3	3	3	3	4	4	3	4	3	5	2	4	3	3	4
PF01018	GTP1/OBG	3	3	3	3	3	3	3	4	3	4	4	4	2	4	4	5	5	6	4
PF01019	Gamma-glutamyltranspeptidase	2	4	2	3	2	2	2	3	2	2	2	2	2	2	2	3	4	3	5
PF01020	Ribosomal L40e family			10	11	9	7	8	5	8	11	12	12	2	7	11	9	7	10	8
PF01025	GrpE	4	4	4	4	4	4	4	4	4	4	4	4	4	4	4	6	6	6	3
PF01026	TatD related DNase	1	3	2	2	3	2	2	2	2	2	2	2	2	3	1	6	4	2	3
PF01027	Inhibitor of apoptosis-promoting Bax1	8	7	8	7	9	10	8	7	9	10	9	9	7	10	11	9	11	9	10
PF01028	Eukaryotic DNA topoisomerase I, catalytic core	1	1	1	1	1	1	1	1	1	1	1	1	1	1	1	1	1	2	3
PF01029	NusB family	2	2	2	2	2	2	2	2	2	2	2	1	1	2	2	3	5	3	3
PF01031	Dynamin central region	12	11	11	12	12	11	11	10	9	11	12	14	8	12	11	18	14	21	13
PF01039	Carboxyl transferase domain	3	3	3	3	3	3	3	3	3	4	4	4	2	3	5	5	4	6	10
PF01040	UbiA prenyltransferase family	6	9	9	8	7	8	7	9	8	8	9	11	7	8	10	12	10	15	12
PF01042	Endoribonuclease L-PSP	2	3	5	1	3	3	3	3	3	3	3	3	3	3	3	3	3	4	2
PF01043	SecA preprotein cross-linking domain	2	2	2	2	2	2	2	2	1	2	2	3	2	2	2	2	3	4	3
PF01048	Phosphorylase superfamily	4	4	4	4	4	4	4	4	4	5	4	5	3	4	4	5	3	7	4
PF01053	Cys/Met metabolism PLP-dependent enzyme	8	7	8	7	11	10	9	12	4	5	4	5	7	3	6	10	6	4	6
PF01055	Glycosyl hydrolases family 31 TIM-barrel domain	8	7	7	8	6	6	8	7	6	5	5	5	5	9	4	8	7	6	5
PF01058	NADH ubiquinone oxidoreductase, 20 Kd subunit	1	1	2	1	10	2	2	2	1	2	2	2	1	1	2	5	10	3	4
PF01061	ABC-2 type transporter	55	58	68	75	71	65	61	68	53	59	63	70	45	59	56	78	96	122	72
PF01062	Bestrophin, RFP-TM, chloride channel	1	1	1	1	1	1	1	1	1			2	1	1	1	2	2	1	1
PF01063	Amino-transferase class IV	8	8	9	9	10	10	12	10	11	7	9	10	9	10	9	21	12	16	22
PF01066	CDP-alcohol phosphatidyltransferase	4	5	6	6	5	6	6	6	4	7	5	7	5	4	4	7	14	9	9
PF01067	Calpain large subunit, domain III	1	1	1	1	1	1	1	1	1	1	1	1		1	1	1	2	2	1
PF01068	ATP dependent DNA ligase domain	4	4	3	3	3	3	3	3	2	3	3	3	3	3	5	3	6	7	5
PF01070	FMN-dependent dehydrogenase	10	6	8	8	9	10	7	9	4	10	11	11	4	3	10	14	8	12	9
PF01071	Phosphoribosylglycinamide synthetase, ATP-grasp (A) domain	2	2	3	3	4	3	3	3	2	3	2	2	3	2	3	4	4	8	1
PF01073	3-beta hydroxysteroid dehydrogenase/isomerase family	10	9	11	12	15	11	12	9	10	9	9	9	6	11	8	13	5	38	11
PF01074	Glycosyl hydrolases family 38 N-terminal domain	5	6	5	3	5	5	5	6	4	2	4	4	2	3	4	8	5	9	5
PF01075	Glycosyltransferase family 9 (heptosyltransferase)																1
PF01077	Nitrite and sulphite reductase 4Fe-4S domain	1	3	6	2	4	4	4	4	4	4	4	4	2	4	4	10	6	4	5
PF01078	Magnesium chelatase, subunit ChlI	1	2	2	2	2	2	2	2	2	2	2	2	2	1	1	2	2	2	2
PF01080	Presenilin	1	1	2	2	2	2	2	2	2	2	1	2		2	1	2	2	3	2
PF01081	KDPG and KHG aldolase	2	1	1	1	1	1	1	1	1	1	1	1	1	1	1	1	4	1	1
PF01084	Ribosomal protein S18	1	1	1	4	6	1	1	1	1	1	1	1	1	1	1	4	3	3	2
PF01086	Clathrin light chain	2	3	2	2	2	2	2	2	2	2	2	2	3	2	2	1	2	2	2
PF01087	Galactose-1-phosphate uridyl transferase, N-terminal domain	1	1	1		1	1	1		1	1	1	1	1	2		1	1	1	1
PF01088	Ubiquitin carboxyl-terminal hydrolase, family 1	4	4	6	6	6	5	5	5	5	6	6	6	2	7	6	12	5	8	7
PF01090	Ribosomal protein S19e	3	3	2	2	3	3	2	2	4	2	2	2	2	3	3	1	2	3	3
PF01092	Ribosomal protein S6e	2	2	2	2	3	3	2	2	4	2	2	2	2	3	3	2	3	4	2
PF01094	Receptor family ligand binding region	11	12	23	16	24	26	24	20	17	19	15	20	10	17	21	18	24	46	18
PF01095	Pectinesterase	40	44	36	39	43	38	38	51	68	41	50	40	30	70	40	51	39	61	44
PF01096	Transcription factor S-II (TFIIS)	5	5	7	9	7	8	7	7	5	5	8	7	5	5	6	10	9	9	8
PF01097	Arthropod defensin			1															1	1
PF01103	Omp85 superfamily domain	10	8	9	8	9	9	9	9	8	10	7	8	4	8	10	12	8	14	9
PF01105	emp24/gp25L/p24 family/GOLD	9	10	11	9	10	12	10	10	10	11	9	10	6	12	11	11	12	21	14
PF01106	NifU-like domain	6	9	8	8	8	8	8	8	10	11	8	8	8	8	11	9	8	8	8
PF01107	Viral movement protein (MP)																9			4
PF01111	Cyclin-dependent kinase regulatory subunit	1	1	2	1	1	1	1	1	1	2	1	3		1	2	1	1	2	1
PF01112	Asparaginase	5	4	6	6	6	5	4	8	5	6	7	6	4	7	6	7	8	9	5
PF01113	Dihydrodipicolinate reductase, N-terminus	2	2	3	3	3	3	3	3	4	3	3	4	3	4	4	9	6	5	3
PF01115	F-actin capping protein, beta subunit	2	3	1	1	1	1	1	1	1	1	1	1	1	1	1	1	1	1	1
PF01116	Fructose-bisphosphate aldolase class-II	1	1	1	1	1	1	1	1	1	1	1	1	1	1	1	1	1	1	1
PF01117	Aerolysin toxin				1	1	1		2				2							1
PF01118	Semialdehyde dehydrogenase, NAD binding domain	2	2	2	3	3	3	2	3	2	2	2	2	2	3	2	3	2	2	3
PF01119	DNA mismatch repair protein, C-terminal domain	1	2	2	2	3	2	3	3	2	3	3	3	3	3	2	2	5	10	2
PF01120	Alpha-L-fucosidase	2	2	2	2	2	2	2	2	3	2	2	2		2	2	2	2	2	2
PF01121	Dephospho-CoA kinase	1	1	1	1	1	1	1	1			2	1	2	1		1	1	2	1
PF01124	MAPEG family	2	2	2	2	2	2	2	2	1	1	1	1	1	1	2	1	2	2	5
PF01125	Pre-mRNA-splicing factor BUD31	3	3	2	2	2	2	2	2	2	4	1	3		2	2	10	2	5	3
PF01126	Heme oxygenase	1	2	4	4	4	4	4	2	3	4	3	5	4	2	4	2	4	3	3
PF01127	Succinate dehydrogenase/Fumarate reductase transmembrane subunit			3	2	3	3	3	2	1	1	1	2		2	1	1	1	2	3
PF01128	2-C-methyl-D-erythritol 4-phosphate cytidylyltransferase	1	2	1	1	1	1	1	1	1	2	1	1	1	1		1	1	1	1
PF01131	DNA topoisomerase	3	3	3	3	3	4	4	3	3	4	3	3	3	3	4	7	7	9	5
PF01132	Elongation factor P (EF-P) OB domain	3	3	3	3	3	2	3	3	3	2	3	3	2	2	2	3	3	2	4
PF01133	Enhancer of rudimentary			2	1	2	2	2	2	2	2	2	2	2	1	2	2	2	5	2
PF01134	Glucose inhibited division protein A	1	1	1	2	2	1	1	1	1	1	1	4	1	1	1	2	1	2	3
PF01135	Protein-L-isoaspartate(D-aspartate) O-methyltransferase (PCMT)	2	2	3	2	2	2	3	2	2	2	2	3		2	2	5	4	2	2
PF01137	RNA 3'-terminal phosphate cyclase	1	2	2	1	1	2	2	1	1	1	1	1	1			2	1	1	1
PF01138	3' exoribonuclease family, domain 1	9	11	10	10	11	11	10	10	10	9	10	10	10	12	8	14	36	17	12
PF01142	tRNA pseudouridine synthase D (TruD)	4	2	2	2	2	2	2	2	3	3	3	2	1	3	3	3	5	9	3
PF01145	SPFH domain / Band 7 family	14	16	17	17	17	17	16	15	12	14	18	15	8	15	16	29	21	13	23
PF01148	Cytidylyltransferase family	3	3	3	3	3	3	3	3	3	3	4	3	3	3	3	6	3	6	3
PF01149	Formamidopyrimidine-DNA glycosylase N-terminal domain	2		2	2	2	2	2	2	2	2	2	2	1	1	3	3	3	4	2
PF01150	GDA1/CD39 (nucleoside phosphatase) family	14	15	15	13	13	13	16	14	18	11	14	13	6	11	11	21	11	20	12
PF01151	GNS1/SUR4 family	1	1	2	2	2	1	1	2	2	2	2	2		3	1	2		2	2
PF01152	Bacterial-like globin	1	2	1	1	1	1	1	1	1	1	1	1		1	1	2	1	1	1
PF01154	Hydroxymethylglutaryl-coenzyme A synthase N terminal	2	2	2	2	2	2	2	2	2	2	2	2	1	2	2	3	2	3	3
PF01156	Inosine-uridine preferring nucleoside hydrolase	10	10	13	13	12	13	14	16	12	11	12	14	10	10	11	19	14	36	17
PF01157	Ribosomal protein L21e	2	2	2	2	2	2	2	2	2	2	2	3	2	2	2	2	2	2	2
PF01158	Ribosomal protein L36e	3	2	3	3	4	5	2	2	2	4	4	3	3	2	1	5	2	3	5
PF01159	Ribosomal protein L6e	2	2	2	2	3	3	2	2	2	2	2	2	2	2	2	2	2	2	2
PF01161	Phosphatidylethanolamine-binding protein	14	15	20	22	22	19	20	22	19	18	18	23	12	18	20	19	21	26	17
PF01163	RIO domain	2	1	2	2	2	2	2	2	2	2	2	3	5	3	1	3	5	5	2
PF01165	Ribosomal protein S21	4	3	4	3	3	2	3	2	3	4	3	3	2	3	4	4	3	4	4
PF01167	Tub family	16	13	19	14	14	15	20	15	15	15	15	15	14	15	14	28	26	24	21
PF01168	Alanine racemase, N-terminal domain	1		2	2	2	2	2	2	2	2	2	2	2	2	2	2	2	2	4
PF01169	Divalent cation/proton antiporter GDT1	10	8	12	11	10	10	10	14	10	12	10	10	10	10	12	15	11	16	17
PF01170	RMKL-like, methyltransferase domain	1	1	1	2	1	1	1	2		1	1	1	1		1	1	1	1	1
PF01171	PP-loop family	2	2	3	1	2	2	2	2	1	4	2	2	1	2	2	4	3	7	2
PF01172	Shwachman-Bodian-Diamond syndrome (SBDS) N-terminal domain	3	2	3	3	2	3	2	3	1	1	1	1	1	1	1	2	1	1	3
PF01174	SNO glutamine amidotransferase family	1	1	1	1	1	1	1	1	2	1	1	1	1	2	1	1	1	2	2
PF01176	Translation initiation factor 1A / IF-1	2	3	5	4	9	4	3	4	3	3	2	4	1	4	2	6	7	3	4
PF01177	Asp/Glu/Hydantoin racemase			1	1	1	1	1	1	1	1	1	1	1	1	1	2	1	1	1
PF01179	Copper amine oxidase, enzyme domain	5	2	8	4	9	13	5	6	10	8	7	9	6	8	8	7	9	15	5
PF01180	Dihydroorotate dehydrogenase	3	3	2	2	2	2	2	2	2	3	2	4	2	2	2	3	4	3	2
PF01182	Glucosamine-6-phosphate isomerases/6-phosphogluconolactonase	4	4	4	4	4	4	4	3	4	4	6	4	2	4	4	7	9	8	7
PF01187	Macrophage migration inhibitory factor (MIF)	3	3	3	3	3	3	3	3	2	2	3	3	1	2	3	4	4	4	6
PF01189	16S rRNA methyltransferase RsmB/F	8	7	10	9	9	10	10	10	9	9	10	9	9	10	9	16	16	17	11
PF01190	Pollen protein Ole e 1 like	18	23	24	24	24	23	19	19	24	21	23	24	19	25	22	46	27	31	25
PF01191	RNA polymerase Rpb5, C-terminal domain	4	4	4	5	4	4	4	5	5	4	4	4	5	5	4	5	8	6	5
PF01192	RNA polymerase Rpb6		1	2	2	2	2	2	2	3	2	2	2	2	2	2	3	1	3	2
PF01193	RNA polymerase Rpb3/Rpb11 dimerisation domain	4	3	4	5	10	3	3	3	2	3	2	2	2	3	2	8	7	3	5
PF01194	RNA polymerases N / 8 kDa subunit	1	2	1	2	2	2	2	2	2	2	2	2	2	2	2	3	2	2	3
PF01195	Peptidyl-tRNA hydrolase	4	6	4	4	4	5	4	4	4	4	4	5	3	3	3	6	4	9	9
PF01196	Ribosomal protein L17	2	2	2	2	2	2	2	2	4	4	2	3	2	2	1	5	2	3	2
PF01197	Ribosomal protein L31	1	1	1	1	1	1		1	1	1	1	1	1	1	1	1	1	1	1
PF01198	Ribosomal protein L31e	3	2	3	2	5	5	3	2	3	3	3	3	3	3	3	3	3	2	3
PF01199	Ribosomal protein L34e	4	5	4	4	4	4	4	4	4	5	5	4	4	4	4	3	4	3	5
PF01200	Ribosomal protein S28e	2	2	2	2	2	2	1	2	2	3	2	2	1	3	3	1	2	2	2
PF01201	Ribosomal protein S8e	4	3	4	4	4	4	4	4	4	4	5	4	4	4	4	5	4	3	4
PF01202	Shikimate kinase	2	4	5	5	6	6	5	5	5	5	6	5	3	5	5	10	6	5	7
PF01204	Trehalase	2	1	3	1	1	1	2	1	1	1	1	1	1	1	1	1	2	1	1
PF01205	Uncharacterized protein family UPF0029	1	1	1	1	1	1	1	1	1	1	1	1		1	1	2	1	1	1
PF01207	Dihydrouridine synthase (Dus)	3	4	4	4	4	4	4	5	3	4	4	4	5	3	4	6	5	4	5
PF01208	Uroporphyrinogen decarboxylase (URO-D)	2	3	2	2	2	2	2	2	4	4	3	4	2	3	4	5	3	2	2
PF01209	ubiE/COQ5 methyltransferase family	2	3	2	2	2	2	2	2	2	2	2	2	4	2	2	6	4	7	2
PF01210	NAD-dependent glycerol-3-phosphate dehydrogenase N-terminus	3	5	5	5	5	5	5	5	5	4	3	5	3	5	4	6	5	13	6
PF01212	Beta-eliminating lyase	3	3	3	3	3	3	4	3	3	2	3	3	1	3	3	3	3	3	7
PF01213	CAP N-terminal conserved motif	2	2	1	2	1	1	2	2	2	2	2	2	2	2	2	2	2	4	2
PF01214	Casein kinase II regulatory subunit	4	3	3	3	3	3	3	3	2	3	3	3	3	3	3	5	3	8	6
PF01215	Cytochrome c oxidase subunit Vb	1	1	2	2	2	2	2	2	2	3	4	3	2	3	3	2	4	3	4
PF01217	Clathrin adaptor complex small chain	10	9	11	13	13	10	10	9	11	12	10	12	10	9	9	16	12	17	21
PF01218	Coproporphyrinogen III oxidase	2	2	2	2	2	2	2	3	2	4	2	2	2	2	3	1	9	2	3
PF01221	Dynein light chain type 1	6	7	7	8	7	6	7	7	7	8	7	7	6	8	8	8	9	13	7
PF01222	Ergosterol biosynthesis ERG4/ERG24 family	4	5	2	2	2	2	2	2	2	2	2	2	2	2	2	7	2	2	2
PF01227	GTP cyclohydrolase I	2	3	2	2	2	2	2	2	2	2	2	2	2	2	2	2	2	4	2
PF01230	HIT domain	6	7	7	6	7	6	7	6	7	9	7	7	6	7	7	11	8	6	6
PF01233	Myristoyl-CoA:protein N-myristoyltransferase, N-terminal domain			1	1	1	1	1	1	1	1	1	1	1	1	1	1	1	1	1
PF01237	Oxysterol-binding protein	8	8	6	6	6	6	6	6	8	6	8	6	7	7	6	8	12	13	9
PF01238	Phosphomannose isomerase type I C-terminal	1	1	1	2	3	2	1	2	1	2	1	2	1	2	2	1	3	1	1
PF01239	Protein prenyltransferase alpha subunit repeat	8	8	10	11	16	15	11	11	11	12	18	15	10	17	9	35	21	12	12
PF01241	Photosystem I psaG / psaK	2		2	2	2	2	2	2	2	2	2	3	1	2	2	3	2	2	2
PF01243	Pyridoxamine 5'-phosphate oxidase	1	1	1	1	1	1	1	1	1	1	1	1	1	1	1	1	1	2	4
PF01245	Ribosomal protein L19	2	2	2	2	3	2	2	2	2	2	2	2	2	2	2	4	7	3	3
PF01246	Ribosomal protein L24e	3	2	4	4	4	4	4	5	5	4	4	4	4	3	3	8	6	6	4
PF01247	Ribosomal protein L35Ae	4	3	4	2	3	3	3	3	3	3	3	3	2	3	3	6	3	5	4
PF01248	Ribosomal protein L7Ae/L30e/S12e/Gadd45 family	11	11	12	10	11	11	11	12	10	11	11	10	10	11	12	20	13	15	15
PF01249	Ribosomal protein S21e	2	2	2	3	4	4	3	3	3	3	3	3	3	3	3	2	3	2	7
PF01250	Ribosomal protein S6	2	2	3	3	3	3	3	2	4	4	4	4	1	3	3	2	4	3	3
PF01251	Ribosomal protein S7e	2	2	2	2	3	3	2	2	2	2	2	2	2	2	2	4	2	3	3
PF01253	Translation initiation factor SUI1	5	6	6	6	6	5	4	6	4	6	6	6	4	6	6	12	6	7	11
PF01255	Putative undecaprenyl diphosphate synthase	13	9	6	10	11	10	7	8	13	7	7	8	1	12	7	5	9	10	9
PF01256	NAD(P)H-hydrate dehydratase		1	1	2	1	1	1	1	1		1	1	1	1	1	1	2	1	3
PF01257	Thioredoxin-like [2Fe-2S] ferredoxin	1		1	1	1	1	1	1	1	1	1	1	1	1	1	1	1	1	1
PF01259	SAICAR synthetase	1	1	1	1	1	1	1	1	1	1	1	1	2	1	1	2	1	1	4
PF01263	Aldose 1-epimerase	14	18	21	18	21	23	21	20	16	17	16	17	13	18	18	21	19	33	20
PF01264	Chorismate synthase	2	2	3	2	2	2	1	1	1	1	1	1	1	1	1	1	1	1	1
PF01266	FAD dependent oxidoreductase	17	15	10	12	11	11	9	10	10	9	9	7	7	11	10	11	10	13	8
PF01267	F-actin capping protein alpha subunit	2	2	1	1	1	1	1	1	1	1	1	1	1	1	1	1	1	1	1
PF01268	Formate--tetrahydrofolate ligase	1	1	1	2	1	1	1	1	1	1	1	1	1	1	1	2	1	1	2
PF01269	Fibrillarin	4	4	3	1	2	2	1	2	2	3	5	4	2	2	3	4	2	2	1
PF01273	LBP / BPI / CETP family, N-terminal domain	2	2	3	3	3	2	2	2	2	2	2	2	1	2	2	3	2	2	4
PF01274	Malate synthase, TIM barrel domain	1	1	1	1	1	1	1	1	1	1	1	1	1	1	1	2	2	2	2
PF01276	Orn/Lys/Arg decarboxylase, major domain	1	1	1	1	1	1	1	1		1			1			3	8	7
PF01277	Oleosin	3	3	6	5	7	3	1	3	6	4	5	4		5	5	6	7	9	4
PF01280	Ribosomal protein L19e, N-terminal domain	3	3	4	4	4	2	2	3	2	3	2	2	2	2	2	2	2	3	4
PF01281	Ribosomal protein L9, N-terminal domain	2	2	3	2	2	2	3	3	2	2	2	2	2	2	2	2	4	3	5
PF01282	Ribosomal protein S24e	3	3	3	3	3	3	3	3	3	3	3	3	2	3	3	3	3	3	4
PF01283	Ribosomal protein S26e	2	2	2	2	2	2	2	2	2	2	2	2	2	1	1	4	2	2	1
PF01287	Eukaryotic elongation factor 5A hypusine, DNA-binding OB fold	5	4	3	3	3	4	3	3	3	4	3	4	3	3	5	9	4	4	6
PF01288	7,8-dihydro-6-hydroxymethylpterin-pyrophosphokinase (HPPK)	1	1	2	2	3	3	3	2	2	1		2		1	1	3	2	5	3
PF01293	Phosphoenolpyruvate carboxykinase	3	3	3	2	3	2	3	2	3	3	3	3	2	3	3	5	3	3	4
PF01294	Ribosomal protein L13e	1	2	2	2	2	2	2	2	2	3	2	2	2	2	2	7	3	3	8
PF01300	Telomere recombination	1	1	2	2	2	2	2	3	2	1	2	2		2	2	2	3	4	3
PF01301	Glycosyl hydrolases family 35	23	24	16	16	17	16	16	21	20	17	16	19	12	22	14	24	21	17	22
PF01302	CAP-Gly domain	1		2	2	2	2	2	2	2	2	2	2	2	2	2	2	4	4	4
PF01315	Aldehyde oxidase and xanthine dehydrogenase, a/b hammerhead domain	12	10	10	12	9	11	9	12	8	9	9	10	7	11	5	8	21	17	10
PF01321	Creatinase/Prolidase N-terminal domain	2	1	2	2	2	2	2	2	2	2	2	2	2	2	1	3	2	2	2
PF01323	DSBA-like thioredoxin domain	1		3	1	3	3	3	2	2	2	2	2	1	2	1		3	1	2
PF01326	Pyruvate phosphate dikinase, AMP/ATP-binding domain	5	6	8	8	7	8	7	7	8	8	8	5	4	7	8	12	27	22	20
PF01327	Polypeptide deformylase	2	3	2	2	2	2	2	2	2	2	3	2	1	2	2	4	3	2	2
PF01329	Pterin 4 alpha carbinolamine dehydratase	2	2	2	2	3	1		2	2	2	2	2	1	2	1	4	2	4	1
PF01331	mRNA capping enzyme, catalytic domain	1	1	1	1	1	1	1	1	1	1	1	1	2	1	1	2	1	2	1
PF01333	Apocytochrome F, C-terminal			1	2	5											5	2		2
PF01336	OB-fold nucleic acid binding domain	11	14	18	15	14	16	17	14	11	13	13	13	13	10	13	19	8	17	17
PF01343	Peptidase family S49	2	2	2	2	2	2	2	2	2	2	2	2		2	2	2	2	2	4
PF01344	Kelch motif	45	48	62	67	65	58	56	62	55	44	55	60	41	40	52	119	111	135	69
PF01348	Type II intron maturase		1	6	5	6	4	2	4	2	2	3	3	1	3	2	8	3	1	4
PF01351	Ribonuclease HII	2	4	1	2	2	2	2	2	1	1	1	1	1	1	1	1	1	4	2
PF01357	Expansin C-terminal domain	60	64	67	67	69	60	64	65	71	66	60	77	37	57	60	77	77	99	84
PF01363	FYVE zinc finger	4	4	19	18	18	18	18	18	18	20	18	19	16	19	20	24	28	26	19
PF01367	5'-3' exonuclease, C-terminal SAM fold	1	2	3	2	2	2	3	2	2	1	2	2	2	2	1	7	4	2	3
PF01369	Sec7 domain	10	10	9	8	7	9	8	7	7	8	8	6	7	8	8	6	11	7	8
PF01370	NAD dependent epimerase/dehydratase family	69	69	79	81	84	80	74	88	61	72	68	76	43	74	58	91	88	101	89
PF01373	Glycosyl hydrolase family 14	11	11	12	11	11	11	10	12	10	15	10	10	10	10	13	11	12	16	11
PF01379	Porphobilinogen deaminase, dipyromethane cofactor binding domain	2	2	2	2	3	1	2	1	1	1	1	1	2	1	1	3	1	2	1
PF01380	SIS domain	5	5	5	5	5	6	5	5	3	3	5	7	5	5	3	7	7	3	5
PF01381	Helix-turn-helix	2	1	2	2	2	2	1	2	2	2	2	2	1	1	2	4	2	3	3
PF01384	Phosphate transporter family	1	1	1	1	1	1	1	1	1	1	1	1	1	1	1	2	1	1	1
PF01386	Ribosomal L25p family	2	2	2	2	2	2	1	2	2	1	3	1	2	2	1	4	2	3	1
PF01388	ARID/BRIGHT DNA binding domain	7	8	7	8	8	8	8	8	8	8	7	9	8	8	9	16	13	11	11
PF01391	Collagen triple helix repeat (20 copies)	1
PF01394	Clathrin propeller repeat	4	4	3	4	4	4	3	4	4	1	2	5	3	3	3	4	4	4	3
PF01396	Topoisomerase DNA binding C4 zinc finger	2	1	2	1	2	2	2	2	2		2	1	2	2	2	5	2	3	4
PF01397	Terpene synthase, N-terminal domain	40	35	35	51	45	33	23	28	24	37	33	46	27	22	30	57	43	68	43
PF01398	JAB1/Mov34/MPN/PAD-1 ubiquitin protease	9	11	13	12	12	12	13	13	11	14	13	12	15	11	12	23	14	13	14
PF01399	PCI domain	19	16	20	23	21	21	20	22	18	19	19	19	21	20	18	38	34	24	31
PF01405	Photosystem II reaction centre T protein																	3	4
PF01406	tRNA synthetases class I (C) catalytic domain	2	3	2	2	2	2	2	2	2	3	3	4	3	2	3	8	9	7	2
PF01408	Oxidoreductase family, NAD-binding Rossmann fold	4	5	4	4	5	4	4	4	3	4	4	2	2	4	4	3	12	6	4
PF01409	tRNA synthetases class II core domain (F)	1	2	3	1	2	2	2	2	2	2	2	2	2	2	2	5	2	4	2
PF01411	tRNA synthetases class II (A)	3	4	5	5	5	6	4	5	2	4	4	4	5	4	5	4	4	4	6
PF01412	Putative GTPase activating protein for Arf	15	11	15	16	15	14	16	16	15	15	15	15	15	15	14	28	19	32	21
PF01416	tRNA pseudouridine synthase	6	7	7	8	8	8	8	8	6	8	6	8	5	8	6	12	7	24	8
PF01417	ENTH domain	6	6	7	5	6	5	5	5	6	7	4	6	6	6	5	10	5	7	6
PF01419	Jacalin-like lectin domain	26	24	32	78	42	45	36	68	36	28	38	49	12	31	38	52	46	47	31
PF01422	NF-X1 type zinc finger	10	13	16	17	17	17	15	10	11	11	11	11	11	11	11	18	17	27	27
PF01423	LSM domain	23	23	27	26	25	24	24	25	22	25	29	26	23	25	24	28	30	30	27
PF01424	R3H domain	4	2	4	5	5	4	4	5	4	4	4	3	4	4	4	5	6	5	6
PF01425	Amidase	16	18	15	17	14	12	15	17	15	13	15	15	11	14	15	25	16	23	16
PF01426	BAH domain	15	18	17	17	17	15	16	17	16	15	17	14	17	13	14	22	27	39	17
PF01428	AN1-like Zinc finger	12	12	15	19	17	12	12	11	14	13	17	15	6	16	12	26	22	26	23
PF01429	Methyl-CpG binding domain	18	9	13	14	14	13	10	14	13	12	8	13	9	16	9	28	20	21	14
PF01432	Peptidase family M3	2	4	5	2	3	3	5	3	3	4	6	3	4	3	4	3	3	4	3
PF01433	Peptidase family M1 domain	7	6	8	8	6	9	7	9	6	5	5	7	5	5	5	8	7	8	7
PF01434	Peptidase family M41	10	9	9	9	9	10	9	9	8	10	8	10	9	9	8	15	10	12	10
PF01435	Peptidase family M48	5	4	5	9	7	7	8	8	4	5	6	6	4	4	6	9	6	5	3
PF01436	NHL repeat	3	3	4	4	4	4	4	4	4	4	4	3	4	4	4	4	6	4	6
PF01439	Metallothionein	4	4	6	5	5	1	3	4	7	8	7	7	3	7	7	13	8	2	5
PF01448	ELM2 domain	1	2													1		1	2
PF01450	Ketol-acid reductoisomerase, C-terminal domain	4	4	4	4	4	4	4	4	4	4	4	4	4	4	4	4	4	4	5
PF01451	Low molecular weight phosphotyrosine protein phosphatase	1	1	2	1	1	1	1	1	1	1	1	1	1	1	1	1	2	1	2
PF01453	D-mannose binding lectin	47	56	76	64	73	65	55	58	45	50	45	54	46	60	48	135	116	111	80
PF01454	MAGE homology domain	2	2	1	1	1	1	1	1	1	2	2	2	1	1	2	1	1	1	3
PF01457	Leishmanolysin	1	1	1	1	1	1	1	1	1	1	1	1	1	1	1	1	1	3	1
PF01458	SUF system FeS cluster assembly, SufBD core domain	2	2	2	2	2	2	2	2	2	3	1	2	1	2	2	2	2	2	2
PF01459	Eukaryotic porin	9	10	9	9	10	10	9	10	9	7	8	8	7	8	8	12	17	8	10
PF01464	Transglycosylase SLT domain		1	1	1	1		1	1	2	2	2	2	2	2	2	2	2	5	4
PF01465	GRIP domain	1	1	1	1	1	1	1	1	1	1	1	1	1	1	1	1	2	1	1
PF01466	Skp1 family, dimerisation domain	10	11	11	15	10	7	8	11	16	19	18	21	11	13	22	26	14	15	13
PF01467	Cytidylyltransferase-like	13	14	16	13	16	16	15	14	13	12	13	13	10	11	10	25	16	12	24
PF01470	Pyroglutamyl peptidase	2		3	3	3	3	3	3	4	3	3	2	2	4	3	9	4	2	5
PF01471	Putative peptidoglycan binding domain	5	3	4	6	6	3	2	5	4	6	4	4		4	5	4	7	5	6
PF01472	PUA domain	3	2	2	3	3	3	4	3	3	3	3	3	1	3	3	4	3	4	4
PF01474	Class-II DAHP synthetase family	7	6	5	4	4	4	4	5	4	4	4	4	4	4	5	7	4	5	5
PF01476	LysM domain	22	26	27	30	31	23	19	26	21	20	23	28	17	20	23	30	30	35	27
PF01477	PLAT/LH2 domain	13	12	14	13	15	13	12	11	10	12	11	11	8	12	12	23	14	17	14
PF01479	S4 domain	10	11	13	13	17	11	9	11	12	13	11	12	9	11	13	17	19	22	16
PF01480	PWI domain	3	2	5	4	5	4	5	5	5	5	6	5	3	5	5	4	7	6	7
PF01485	IBR domain, a half RING-finger domain	29	21	35	43	39	35	33	39	47	42	48	50	19	43	52	61	50	79	51
PF01486	K-box region	30	33	38	40	36	37	37	41	33	33	37	41	32	32	38	63	55	73	51
PF01487	Type I 3-dehydroquinase	4	3	2	5	3	3	2	6	2	2	1	2	2	2	2	7	4	5	6
PF01488	Shikimate / quinate 5-dehydrogenase	4	4	4	5	5	5	4	6	4	3	3	3	3	4	3	6	5	7	7
PF01490	Transmembrane amino acid transporter protein	86	87	84	77	78	80	84	79	71	88	72	75	53	68	77	85	95	92	83
PF01491	Frataxin-like domain	1	1	1	1	1	1	1	1	1	1	1	1	1	1	1	1	1	2	1
PF01493	GXGXG motif	2	3	3	5	3	2	3	4	3	3	2	3	3	2	3	3	4	3	4
PF01494	FAD binding domain	26	24	23	30	23	21	24	27	19	26	24	22	13	16	17	28	31	27	32
PF01496	V-type ATPase 116kDa subunit family	4	5	2	2	2	2	2	2	2	3	1	2	2	2	1	3	2	2	4
PF01501	Glycosyl transferase family 8	26	31	37	37	40	35	35	35	32	30	32	35	27	32	30	45	45	49	38
PF01502	Phosphoribosyl-AMP cyclohydrolase	1	1	1	1	1	1	1	1	1	1	1	1	2	1	1	1	1	3	1
PF01503	Phosphoribosyl-ATP pyrophosphohydrolase	1	1	1	1	1	1	1	1	1	1	1	1	2	1	1	1	1	2	1
PF01504	Phosphatidylinositol-4-phosphate 5-Kinase	24	22	25	18	21	23	24	20	19	18	20	21	17	19	19	24	27	28	22
PF01507	Phosphoadenosine phosphosulfate reductase domain	2	1	2	3	3	3	2	2	2	2	2	2	2	2	2	5	4	2	3
PF01509	TruB family pseudouridylate synthase (N terminal domain)	3	2	3	4	3	3	4	3	3	3	3	3	1	3	3	6	3	5	3
PF01512	Nuo51 FMN-binding domain			1	1	1	1	1	1	1	1	1	1	1	1	1	1	1	1	1
PF01513	ATP-NAD kinase N-terminal domain	2		4	4	4	4	4	4	3	4	4	4	3	3	3	5	4	4	4
PF01521	Iron-sulphur cluster biosynthesis	2	3	4	4	4	4	4	4	3	3	4	4	1	3	3	5	5	3	4
PF01529	DHHC palmitoyltransferase	14	18	32	34	32	33	30	35	31	32	29	32	30	29	32	54	46	40	42
PF01532	Glycosyl hydrolase family 47	4	5	6	5	5	5	5	5	4	3	4	4	4	4	4	10	8	6	5
PF01535	PPR repeat	687	685	1232	1258	1388	1124	1036	1057	750	735	827	658	685	800	727	1650	1974	2126	1456
PF01536	Adenosylmethionine decarboxylase	3	3	3	3	3	3	3	3	3	2	3	2	1	3	2	17	4	3	7
PF01541	GIY-YIG catalytic domain	2	3	3	3	2	3	3	3	2	3	4	5	3	3	1	4	3	3	4
PF01544	CorA-like Mg2+ transporter protein	4	3	4	6	4	4	5	5	3	6	6	6	5	7	5	5	6	8	6
PF01545	Cation efflux family	8	7	12	8	11	10	11	10	9	6	6	9	9	8	6	18	16	17	14
PF01546	Peptidase family M20/M25/M40	19	16	19	15	18	18	17	16	13	14	13	16	11	14	13	15	19	20	18
PF01549	ShK domain-like	1	1	1	2	2	2	2	2	2	2	2	2	1	1	1	3	2	5	1
PF01553	Acyltransferase	19	22	25	27	29	27	24	27	25	27	27	29	22	26	26	32	34	39	34
PF01554	MatE	109	105	137	127	128	111	118	111	119	115	135	133	72	120	120	124	161	163	152
PF01556	DnaJ C terminal domain	22	21	20	21	19	19	19	21	21	20	19	25	16	21	19	24	30	24	23
PF01557	Fumarylacetoacetate (FAA) hydrolase C-terminal	2	3	3	3	3	3	3	3	2	2	2	3	2	1	2	8	5	5	4
PF01559	Zein seed storage protein			13	22	20					2	2	18		7	24		32	27	21
PF01564	Spermine/spermidine synthase domain	4	5	7	5	7	6	8	6	5	5	5	3	6	5	3	10	6	8	9
PF01565	FAD binding domain	34	38	40	44	41	28	28	36	37	35	33	44	15	42	35	39	44	45	44
PF01566	Natural resistance-associated macrophage protein-like	14	17	15	14	11	11	12	14	11	9	10	12	12	12	13	28	17	29	14
PF01569	PAP2 superfamily	8	8	14	14	13	12	14	13	11	13	12	13	10	9	9	18	29	33	17
PF01571	Aminomethyltransferase folate-binding domain	1	1	1	1	1	1	1	1	1	2	2	1	1	1	2	1	1	1	1
PF01575	MaoC like domain	2	3	3	4	3	3	3	3	2	3	3	3	1	3	4	3	4	9	4
PF01578	Cytochrome C assembly protein			3	9	3		1									2	4	1	4
PF01582	TIR domain	2	2	2	2	1	1	2	2	3	3	4	3	2	3	2	1	4	2	2
PF01583	Adenylylsulphate kinase	3	3	3	4	4	3	3	3	3	2	4	3	3	3	3	4	7	7	5
PF01585	G-patch domain	9	9	13	13	14	13	14	13	12	15	10	12	13	13	13	18	42	36	18
PF01588	Putative tRNA binding domain	4	4	4	6	5	6	4	5	4	4	4	4	2	4	4	3	3	5	6
PF01590	GAF domain	9	6	9	7	8	8	7	7	8	8	9	8	7	9	9	16	9	11	16
PF01591	6-phosphofructo-2-kinase	2	2	3	2	2	2	2	2	2	2	2	1	2	2	2	5	3	5	2
PF01592	NifU-like N terminal domain	3	3	2	3	2	3	2	3	2	2	2	2	2	2	2	3	2	2	4
PF01593	Flavin containing amine oxidoreductase	17	18	24	23	23	24	24	19	22	21	22	27	20	20	21	30	29	29	30
PF01594	AI-2E family transporter										1	1				1	1
PF01595	Cyclin M transmembrane N-terminal domain	4	4	4	4	4	4	4	4	4	5	3	4	4	4	4	5	7	5	4
PF01596	O-methyltransferase	8	9	6	6	8	7	7	8	7	7	6	7	5	7	7	11	9	9	8
PF01597	Glycine cleavage H-protein	2	2	2	2	2	2	2	2	3	3	2	3	2	3	3	4	2	3	8
PF01599	Ribosomal protein S27a			3	3	3	2	1	1	2	3	2			2	3	3	2	3	3
PF01602	Adaptin N terminal region	11	12	13	10	13	14	13	12	12	11	12	13	9	11	14	19	19	17	17
PF01603	Protein phosphatase 2A regulatory B subunit (B56 family)	10	10	10	10	10	10	10	10	11	11	11	10	10	9	8	14	12	17	11
PF01612	3'-5' exonuclease	12	13	15	15	19	15	14	11	15	17	22	27	12	15	19	19	25	36	26
PF01619	Proline dehydrogenase	1	1	1	1	1	1	1	1	1	1	1	1	1	1	1	1	1	2	2
PF01624	MutS domain I	4	6	5	5	5	5	5	5	4	6	7	7	4	6	5	6	6	5	4
PF01625	Peptide methionine sulfoxide reductase	6	5	4	4	5	4	4	4	3	3	3	3	3	3	3	5	4	4	4
PF01627	Hpt domain	3	4	7	6	4	7	6	7	5	5	5	5	4	5	5	6	7	11	6
PF01632	Ribosomal protein L35	2	2	2	2	2	2	2	2	2	2	2	3	1	2	2	2	2	2	1
PF01633	Choline/ethanolamine kinase	4	4	4	5	4	4	4	4	5	4	4	5	4	6	4	5	8	5	11
PF01634	ATP phosphoribosyltransferase	2	2	2	2	2	2	2	2	2	3	2	2	1	2	2	1	3	3	2
PF01636	Phosphotransferase enzyme family	2	2	3	3	4	3	3	3	3	3	3	4	2	3	3	5	2	6	6
PF01641	SelR domain	2	2	4	4	4	3	4	4	2	3	3	4	3	2	3	4	3	3	3
PF01643	Acyl-ACP thioesterase N-terminal domain	5	5	5	5	6	6	6	6	5	6	6	6	4	6	5	13	11	7	7
PF01645	Conserved region in glutamate synthase	3	3	3	4	4	3	3	3	3	3	2	3	3	2	4	3	4	3	4
PF01648	4'-phosphopantetheinyl transferase superfamily	4	3	3	3	3	3	3	1	7	3	4	7	1	6	5	4	3	2	5
PF01649	Ribosomal protein S20	1	1	1	1	1	1	1	1	1	1	1	1	1	1	1	2	1	1	1
PF01650	Peptidase C13 family	7	7	6	5	7	5	5	9	3	5	6	5	5	6	7	9	5	5	7
PF01652	Eukaryotic initiation factor 4E	3	3	3	3	3	3	3	3	3	3	2	3	3	3	3	3	3	3	3
PF01655	Ribosomal protein L32	4	4	4	4	4	4	4	4	4	5	4	4	4	3	5	6	4	3	4
PF01656	CobQ/CobB/MinD/ParA nucleotide binding domain	1	1	2	1	1	1	2	1	1	1	1	1		1	1	1	2	1	1
PF01657	Salt stress response/antifungal	149	132	126	118	139	78	74	83	98	106	119	139	46	120	106	151	149	167	116
PF01658	Myo-inositol-1-phosphate synthase	2	2	2	2	2	2	2	2	2	1	2	2	2	2	2	5	2	5	2
PF01661	Macro domain	1	3	4	4	4	4	4	3	4	4	4	4	4	5	4	5	4	7	5
PF01663	Type I phosphodiesterase / nucleotide pyrophosphatase	3	3	5	3	3	4	4	4	4	4	4	4	2	3	4	3	4	5	4
PF01667	Ribosomal protein S27	3	3	3	3	3	2	3	3	3	2	3	3	3	2	4	1	3	3	3
PF01676	Metalloenzyme superfamily	3	5	4	6	4	4	4	6	5	5	4	4	5	5	4	7	5	5	5
PF01678	Diaminopimelate epimerase	2	2	2	2	2	2	2	2	2	2	2	2	2	2	2	4	4	5	6
PF01679	Proteolipid membrane potential modulator	10	8	9	9	9	4	5	4	8	8	10	9	6	7	8	10	10	10	16
PF01680	SOR/SNZ family	1	1	1	2	2	2	1	2	2	2	2	2	1	2	2	6	1	1	2
PF01687	Riboflavin kinase	2	1	2	3	3	2	2	2	1	2	1	1	3	1	2	3	2	3
PF01693	Ribonuclease H1 N-terminal domain	2	1	6	8	5	4	4	14	5		5	10	1	4	4		6	1	1
PF01694	Rhomboid domain	12	11	18	17	16	17	17	16	21	16	15	16	13	23	16	26	19	24	20
PF01697	Glycosyltransferase family 92	6	7	6	5	6	6	6	6	6	6	5	6	5	6	6	6	8	7	5
PF01698	Floricaula / Leafy protein SAM domain	1	1	1	1	1	1	1	1	1	1	1	1		1	1	1		1	1
PF01699	Sodium/calcium exchanger protein	18	14	29	31	29	31	29	27	22	24	23	27	20	25	23	41	41	41	32
PF01701	Photosystem I reaction centre subunit IX / PsaJ																	6		3
PF01702	Queuine tRNA-ribosyltransferase	1	1	2	2	2	2	2	2	1	2	2	2	2	1	2	3	2	3	3
PF01704	UTP--glucose-1-phosphate uridylyltransferase	7	4	5	5	5	5	5	5	5	6	5	7	5	5	6	12	15	8	9
PF01709	TACO1/YebC second and third domain	1	1	1	1	1	1	1	1	1	1	1	1	1	1	1	1	2	1	1
PF01712	Deoxynucleoside kinase	3	2	3	4	3	3	3	3	3	3	3	3	2	3	2	5	7	3	4
PF01713	Smr domain	1	1	1	1	1	1	1	1	1	1	1	1	1	1	1	1	2	2	1
PF01715	IPP transferase	5	5	16	16	15	6	8	10	9	8	6	10	2	10	7	18	15	21	19
PF01716	Manganese-stabilising protein / photosystem II polypeptide	1	1	1	1	1	1	1	1	1	2		1	1	1		2	1	2	1
PF01717	Cobalamin-independent synthase, Catalytic domain	2	2	2	2	2	2	2	2	3	2	2	2	2	4	1	4	2	3	5
PF01722	BolA-like protein		1	4	5	6	6	3	4	2	3	3	3	4	2	2	6	4	6	4
PF01725	Ham1 family	1	1	2	2	1	1	1	1	1	1	1	1	1	1	1	1	1	1	1
PF01728	FtsJ-like methyltransferase	5	4	4	4	3	4	4	4	6	4	4	4	3	3	3	7	6	7	5
PF01729	Quinolinate phosphoribosyl transferase, C-terminal domain	1	1	1	1	1	1	1	1	1	1	1	1	1	1	1	2	2	1	1
PF01730	UreF	1	1	1	1	1	1	1	1		1			1	1	1	2	8	6	1
PF01733	Nucleoside transporter	6	5	8	11	9	4	8	9	3	2	6	5	4	4	9	7	12	13	6
PF01734	Patatin-like phospholipase	29	29	24	30	32	33	29	24	22	27	32	32	17	23	27	21	27	34	25
PF01737	YCF9			2	3	5											4		1	1
PF01738	Dienelactone hydrolase family	15	15	16	16	13	15	14	18	8	8	12	11	9	5	10	16	8	9	11
PF01740	STAS domain	9	10	11	11	11	11	9	11	12	9	11	11	9	12	11	22	14	20	13
PF01743	Poly A polymerase head domain	5	5	3	5	4	4	3	4	3	6	4	5	4	3	5	4	7	4	3
PF01745	Isopentenyl transferase				1		1		1		1
PF01746	tRNA (Guanine-1)-methyltransferase	1	1	1	1	1	1	1	1	1	1	1	1	1	1	1	1	2	1	1
PF01747	ATP-sulfurylase	2	2	2	2	2	2	2	2	1	2	2	2	2	3	1	3	2	2	2
PF01749	Importin beta binding domain	3	4	3	5	5	4	4	3	3	11	5	6	4	3	9	4	4	4	4
PF01751	Toprim domain	5	5	5	4	5	5	5	5	5	4	5	5	4	5	5	7	9	8	4
PF01753	MYND finger	6	6	10	11	10	10	11	9	10	14	11	12	8	12	13	17	13	18	10
PF01754	A20-like zinc finger	10	9	11	12	11	6	8	6	9	11	11	10	3	11	12	21	19	22	19
PF01756	Acyl-CoA oxidase	4	3	4	4	5	4	4	4	5	4	8	6	3	6	3	4	7	5	4
PF01758	Sodium Bile acid symporter family	4	5	5	5	5	5	5	5	6	6	5	5	6	5	6	9	6	6	9
PF01761	3-dehydroquinate synthase N-terminal	1	1	1	1	1	1	1	1	1	1	1	1	1	1	1	1	1	1	1
PF01762	Galactosyltransferase	28	25	35	29	31	29	28	31	29	26	27	34	20	28	24	43	35	41	34
PF01764	Lipase (class 3)	42	42	52	47	53	47	40	43	59	63	58	64	31	58	56	58	67	76	56
PF01765	Ribosome recycling factor	2	2	2	2	2	2	2	2	2	1	2	2	2	2	2	4	3	2	2
PF01774	UreD urease accessory protein	1	1	1	2	1	1	1	1	1	1	1	1	1	1	1	3	3	1	1
PF01775	Ribosomal proteins 50S-L18Ae/60S-L20/60S-L18A	3	3	3	3	3	3	3	3	3	3	3	3	3	3	3	3	3	3	3
PF01776	Ribosomal L22e protein family	2	2	2	2	2	2	2	2	2	2	2	2	2	2	2	2	2	4	2
PF01777	Ribosomal L27e protein family	1	1	3	3	3	3	2	3	2	2	2	2		2	2	2	2	2	2
PF01778	Ribosomal L28e protein family	3	3	4	4	5	6	3	3	2	4	4	4	3	3	4	10	4	3	5
PF01779	Ribosomal L29e protein family	2	1	2	2	2	2	2	2	2	2	2	2		2	2	2	3	2	2
PF01780	Ribosomal L37ae protein family	2	2	3	2	2	2	1	2	2	2	2	2	4	2	2	3	2	4	3
PF01781	Ribosomal L38e protein family	3	3	4	4	4	3	2	4	4	4	4	4	2	4	4	1	4	2	6
PF01782	RimM N-terminal domain	1	1	1	1	1	1	1	1	1	1	1	1	1	1	1	2	1	1	1
PF01783	Ribosomal L32p protein family			1	2	2	1	2	2		1	1	1	1	1	1	2	2	1	1
PF01786	Alternative oxidase	5	5	15	13	7	6	7	8	5	8	6	5	7	6	7	5	5	9	8
PF01788	PsbJ																	5	1	2
PF01789	PsbP	9	9	8	9	10	10	9	9	9	10	8	9	6	9	9	15	12	15	12
PF01794	Ferric reductase like transmembrane component	11	9	11	11	11	11	10	12	10	10	12	12	11	13	9	21	12	17	16
PF01795	MraW methylase family	2	1	1	1	1	2	1	1	1	1	1	1		1	1	2	1	1	1
PF01798	snoRNA binding domain, fibrillarin	7	8	8	8	6	6	6	8	8	8	9	10	4	10	9	9	7	8	6
PF01799	[2Fe-2S] binding domain	7	6	9	11	9	11	9	11	8	8	9	8	6	9	5	8	20	15	9
PF01803	LIM-domain binding protein	5	7	4	4	4	4	5	4	4	4	4	4	4	4	2	7	8	5	4
PF01805	Surp module	7	6	10	11	10	10	10	10	10	9	8	10	11	10	10	12	28	18	15
PF01808	AICARFT/IMPCHase bienzyme	2	1	2	3	2	2	2	2	4	4	3	4	2	4	4	2	2	3	3
PF01809	Putative membrane protein insertion efficiency factor			1	1	1	1	1	1	1	1	1	1		1	1	5	1	2	1
PF01812	5-formyltetrahydrofolate cyclo-ligase family	2	1	2	4	3	3	3	2	3	2	3	3	2	3	4	2	3	4	2
PF01813	ATP synthase subunit D	1	1	2	2	2	2	1	1	2	2	1	2	1	2	2	2	2	2	2
PF01814	Hemerythrin HHE cation binding domain	2	2	7	7	7	7	7	6	7	7	6	7	6	7	6	6	10	10	10
PF01820	D-ala D-ala ligase N-terminus	2	2	2	2	2	2	2	2	2	2	2	2	2	2	2	2	2	4	2
PF01823	MAC/Perforin domain	9	8	7	8	7	7	7	8	8	7	7	8	6	7	7	11	12	11	7
PF01824	MatK/TrnK N-terminal			6		3											2	1		1
PF01833	IPT/TIG domain	4	3	6	6	5	5	6	5	5	4	5	5	6	4	6	4	9	10	8
PF01834	XRCC1 N terminal domain	1
PF01839	FG-GAP repeat	1	2	1	1	1	1	1		1	1	1	1					1	2	1
PF01841	Transglutaminase-like superfamily			1	1	1	1	1	1	1	1	1	1		1	1	2	2	2	1
PF01842	ACT domain	24	23	23	22	21	22	22	22	21	22	23	25	16	20	22	38	28	45	32
PF01843	DIL domain	9	8	12	9	13	12	12	11	9	9	10	11	12	10	7	14	19	20	16
PF01844	HNH endonuclease	1	1	3	2	2	2	3	2	2	2	2	2	2	2	2	3	2	4	1
PF01846	FF domain	7	7	9	9	9	9	9	10	10	14	10	8	9	11	8	10	10	46	15
PF01849	NAC domain	5	6	6	6	9	8	6	7	6	8	5	7	4	7	6	11	6	7	10
PF01851	Proteasome/cyclosome repeat	5	8	4	4	5	5	4	4	7	6	5	6	8	6	6	19	4	4	8
PF01852	START domain	25	25	31	29	29	28	27	27	26	28	27	30	22	31	25	47	41	54	33
PF01853	MOZ/SAS family	1	1	1	3	1	3	3	3	1	1	1	2	1		2	1	1	3	1
PF01857	Retinoblastoma-associated protein B domain	2	2	2	2	2	2	2	2	1	2	2	2	2	1	2	4	2	5	2
PF01858	Retinoblastoma-associated protein A domain	1	1	2	2	2	2	2	5	1	2	2	2	1	1	2	4	2	6	2
PF01866	Putative diphthamide synthesis protein	1	2	3	1	1	2	2	2	1	3	4	2	1	1	2	2	6	3	2
PF01868	Ribonuclease P/MRP, subunit p29	2	2	1	1	1	1	1	1	1	2	2	1		1	2	2	1	5	1
PF01869	BadF/BadG/BcrA/BcrD ATPase family	1	3	2	2	2	2	2	2	2	2	2	2	2	2	2	2	4	3	2
PF01871	AMMECR1	1	1	1	1	1	1	1	1	1	1	1	1	1	1	1	2	1	10	2
PF01872	RibD C-terminal domain	1	1	1	1	1	1	1	1	1	1	1	1	1	1	1		1	2	2
PF01873	Domain found in IF2B/IF5	4	3	4	4	4	4	3	3	4	3	4	4	2	3	4	7	3	6	4
PF01875	Memo-like protein	3	2	2	2	2	2	2	2	1	1	1	1	1	1	1	4	2	1	4
PF01876	RNase P subunit p30	1	1	1	2	2	2		2	2	1	1	2	1	2	2	5	4	4	4
PF01878	EVE domain	1			1	1			1		1	1	1	1	1	1	3	1	2	1
PF01883	Iron-sulfur cluster assembly protein	1	3	3	3	3	2	3	2	3	4	3	3	1	3	4	3	3	3	4
PF01885	RNA 2'-phosphotransferase, Tpt1 / KptA family	1	1	1	1	1	1		1	3	2	1	1	6	2	3	1	1	1	1
PF01894	Uncharacterised protein family UPF0047	2	2	2	2	2	2	2	1	2	2	2	2	1	2	2	2	2	3	4
PF01896	DNA primase small subunit	1	1	1	2	1	1	1	2	1	2	3	3	2	2	2	2	6	1	2
PF01900	Rpp14/Pop5 family	1	1	2	2	3	3	2	2	1	1	2	2	1	1		2	1	1	2
PF01902	Diphthamide synthase	1	1	2		1	1	1	1	1	1	1	1	2	1	1	1	1	1	1
PF01903	CbiX	1	1	2	2	2	2	2	2	1	1	1	1	1	2		3	2	1	1
PF01907	Ribosomal protein L37e	2	2	3	1	2	2	2	2	2	2	4	2	2	2	2	3	3	2	3
PF01909	Nucleotidyltransferase domain	5	2	2	4	4	3	2	3	4	4	4	4	1	4	4	2	4	4	4
PF01912	eIF-6 family	2	2	3	2	2	2	2	2	2	2	2	2	2	3	2	4	3	2	2
PF01915	Glycosyl hydrolase family 3 C-terminal domain	21	22	20	21	18	19	20	21	18	19	20	22	15	17	15	28	27	23	30
PF01916	Deoxyhypusine synthase	2	3	2	2	2	2	3	2	1	2	3	2	2	3	1	5	1	6	1
PF01918	Alba	8	8	9	10	10	10	8	9	10	10	12	10	10	11	9	12	11	11	11
PF01920	Prefoldin subunit	6	5	5	5	5	4	4	4	5	5	7	4	2	5	6	7	6	6	7
PF01922	SRP19 protein	2	2	2	2	2	2	1	2	1	1	1	1	2	1	1	2	2	1	3
PF01925	Sulfite exporter TauE/SafE	8	10	11	10	11	11	6	10	11	8	8	12	5	13	9	25	14	13	15
PF01926	50S ribosome-binding GTPase	27	25	32	30	30	29	28	30	28	31	34	31	28	29	26	36	42	55	34
PF01927	Mut7-C RNAse domain	1	1	1	1	1	1		1	1	1	1	1	1	1	1	1	3	5	1
PF01928	CYTH domain	3	2	3	2	4	3	2	3	3	3	4	4	1	3	2	3	3	4	6
PF01929	Ribosomal protein L14	2	2	3	2	2	2	2	2	2	2	2	2	1	2	2	1	2	2	2
PF01933	2-phospho-L-lactate transferase CofD	1	1	1	1	1	1	1	1	1	1	1	1	1	1	1	1	1	1	1
PF01936	NYN domain	4	6	5	9	7	5	5	7	4	3	5	5	5	3	3	7	10	17	6
PF01937	Damage-control phosphatase ARMT1-like domain	3	3	2	2	2	2	2	1	2	2	2	2	2	2	2	5	2	2	4
PF01938	TRAM domain	2		1	1	1	1	1	1	1	1	1	2		1	1	1	1	1	1
PF01940	Integral membrane protein DUF92	4	3	3	3	3	3	3	2	3	3	3	5	2	3	3	6	5	3	3
PF01946	Thi4 family	1	1	1	2	3	2	1	2	2	2	2	2	1	2	2	2	1	2	2
PF01956	Integral membrane protein EMC3/TMCO1-like	2	2	2	2	2	2	2	2	2	2	2	2	1	2	2	3	2	4	4
PF01959	3-dehydroquinate synthase II	2	1	1	1	1	1	1	1	1	2	1	1		1	1	1	1	2	1
PF01960	ArgJ family	1	1	1	1	1	1	1	1	1	1	1	1	1	1	1	2	1	1	1
PF01963	TraB/PrgY/gumN family	2	2	2	2	2	2	2	2	2	2	2	2	2	2	2	3	3	7	2
PF01964	Radical SAM ThiC family	1	1	1	1	1	1	1	1	1	1	1	1	1	1	1	7	1	1	2
PF01965	DJ-1/PfpI family	11	9	9	11	10	9	10	10	14	15	12	15	13	14	9	24	13	24	12
PF01966	HD domain	1	2	2	2	2		1	1	1	1	1	2	1	1	1	3	2	4	3
PF01967	MoaC family	1	1	1	1	1	1	1	1					1		1	2	3	1	1
PF01968	Hydantoinase/oxoprolinase			1	1	1	1	1	1					1			1	1	1	1
PF01974	tRNA intron endonuclease, catalytic C-terminal domain	1		1	3	1		1	3	1	1		2	1	1	1	3	2	1	1
PF01975	Survival protein SurE	2	3	3	2	3	2	2	2	2	2	2	2	2	2	2	3	2	2	3
PF01979	Amidohydrolase family	7	7	5	6	5	5	5	9	5	5	6	6	5	5	5	8	10	13	16
PF01980	tRNA-methyltransferase O N-terminal domain	1	1	1	1	1	1	1	1	1	1	1	1	1	1	1	1	1	2	1
PF01981	Peptidyl-tRNA hydrolase PTH2	4	3	4	3	3	3	3	3	4	3	3	5	2	4	2	3	9	6	3
PF01984	Double-stranded DNA-binding domain	1	1	1	2	2	2	1	2	1	1	1	1	1	1	1	3	1	1	1
PF01985	CRS1 / YhbY (CRM) domain	20	23	29	30	29	29	29	31	25	29	29	31	30	26	26	37	44	49	36
PF01987	Mitochondrial biogenesis AIM24	1	1	1	1	1	1	1	1		1	1	2	1	1	1	3	2	3	1
PF01988	VIT family	4	5	6	10	8	8	6	9	10	10	11	12	2	8	10	13	11	13	8
PF01990	ATP synthase (F/14-kDa) subunit	1	1	3	1	2	2	2	2	2	2	2	2	1	2	2	3	2	2	3
PF01991	ATP synthase (E/31 kDa) subunit	2	4	3	3	3	3	3	3	3	3	3	3	3	3	3	3	3	6	3
PF01992	ATP synthase (C/AC39) subunit	1	1	1	1	1	1	1	1	1	1	1	1	1	1	1	1	1	1	1
PF01997	Translin family	2	1	2	3	2	2	2	2	1	2	2	3	2	1	3	2	3	4	2
PF02002	TFIIE alpha subunit	2	2	2	3	1		2	1	1	2	1	2	2	1	1	1	1	1	2
PF02005	N2,N2-dimethylguanosine tRNA methyltransferase	1	2	2	2	2	2	2	2	2	3	3	3	4	2	3	6	2	11	5
PF02018	Carbohydrate binding domain	8	9	10	9	10	7	10	9	9	2	8	7	13	7	7	10	12	13	9
PF02020	eIF4-gamma/eIF5/eIF2-epsilon	4	3	4	3	4	4	4	4	4	3	4	4	3	3	4	7	5	4	4
PF02033	Ribosome-binding factor A	1	1	1	1	1	1	1	1	1	1	1	1	1	1	1	1	1	2
PF02036	SCP-2 sterol transfer family	1	1	1	1	1	1	1	1	1	1	1	1	1	1	1	4	1	1	2
PF02037	SAP domain	8	10	9	11	11	12	12	10	8	8	9	8	7	6	8	13	21	14	15
PF02041	Auxin binding protein	2	2	1	2	2	2	1	2	1	1	2	2		2	2	2	1	1	2
PF02042	RWP-RK domain	8	9	15	18	21	19	15	19	16	14	15	15	11	15	16	14	21	17	19
PF02045	CCAAT-binding transcription factor (CBF-B/NF-YA) subunit B	9	8	11	8	11	11	10	10	9	9	10	10	9	12	6	25	19	27	19
PF02046	Cytochrome c oxidase subunit VIa	2	2	1	1	1	1	1	1	1	1	1	1	1	1	1	1	1	1	1
PF02068	Plant PEC family metallothionein	1	1	1		1						1	1		1	1	1	1	1	1
PF02089	Palmitoyl protein thioesterase	3	2	2	2	2	2	2	2	2	1	1	2	1	2	2	3	3	8	3
PF02091	Glycyl-tRNA synthetase alpha subunit		1	1	1	1	1	1	1	1	2	1	1	1	1	2	1	2	1	2
PF02092	Glycyl-tRNA synthetase beta subunit	1	2	1	1	1	1	1	1	1	1	1		2	1	1	1	2	1	2
PF02096	60Kd inner membrane protein	5	4	4	4	4	4	4	4	5	5	6	6	4	4	5	8	7	14	6
PF02099	Josephin	2	2	2	2	2	2	2	2	2	3	1	2	2	2	1	2	3	2	2
PF02104	SURF1 family	1	1	1	1	1	2	1	1	1		1	1	1	1	1	1	4	1	1
PF02109	DAD family	2	2	2	2	2	2	2	2	2	3	1	2	2	2	2	1	1	1	1
PF02110	Hydroxyethylthiazole kinase family	1	1	1	1	1	1	1	1		1	2	1	1	1	1		1	1	2
PF02114	Phosducin	1	1	1	1	1	1	1	1	1	1	1	1		1	1	1	4	1	2
PF02115	RHO protein GDP dissociation inhibitor	7	5	5	4	4	5	6	5	4	5	6	5	3	4	5	4	5	7	7
PF02121	Phosphatidylinositol transfer protein	1	2	1	1	1	1	1	1	1	1	1	1	1	1	1	1	2	1	1
PF02127	Aminopeptidase I zinc metalloprotease (M18)	2	3	3	2	2	3	2	2	2	2	1	2	2	2	2	4	3	2	2
PF02129	X-Pro dipeptidyl-peptidase (S15 family)	1	1	1	1	1	1	1	1	1		1	1		1	1	1	5	1	1
PF02130	Endoribonuclease YbeY	2	2	2	3	2	2	2	2	2	2	2	2	2	2	2	3	2	4	2
PF02133	Permease for cytosine/purines, uracil, thiamine, allantoin	1	1	1	1	1	1	1	1	3	1	1	1		1	4	1	2	1	2
PF02135	TAZ zinc finger	3	3	8	8	10	8	9	8	4	9	9	7	7	4	9	12	22	24	10
PF02136	Nuclear transport factor 2 (NTF2) domain	9	8	9	12	10	10	8	10	9	9	12	12	9	10	9	9	13	10	11
PF02137	Adenosine-deaminase (editase) domain	1	1	2	1	1	1	2	1	1		1	1	1	1	1	9	3	1	1
PF02138	Beige/BEACH domain	8	10	5	5	6	7	4	5	4	4	5	5	7	4	6	6	10	10	8
PF02140	D-galactoside/L-rhamnose binding SUEL lectin domain	6	7	10	10	10	10	10	10	9	10	10	7	9	9	8	15	16	14	10
PF02141	DENN (AEX-3) domain	3	3	4	2	3	3	3	3	3	3	3	2	3	3	3	12	3	3	11
PF02142	MGS-like domain	4	3	3	3	3	3	3	3	4	4	4	5	3	4	4	3	3	4	4
PF02144	Repair protein Rad1/Rec1/Rad17	1	1	1	1	1	1	1	1	3	2	1	2	1	1	2	2	2	1	1
PF02146	Sir2 family	1	2	2	2	2	2	2	2	1	2	2	4	2	2	1	5	3	6	4
PF02148	Zn-finger in ubiquitin-hydrolases and other protein	4	5	11	11	10	11	10	9	8	12	12	10	11	8	14	8	22	20	11
PF02149	Kinase associated domain 1	1	1	3	3	3	3	3	3	3	3	3	3	3	3	3	7	5	7	6
PF02150	RNA polymerases M/15 Kd subunit	2	4	4	3	5	5	3	2	1	2	5	5	2	2	3	6	6	6	5
PF02151	UvrB/uvrC motif	3	4	5	4	5	5	5	4	5	4	4	4	4	4	4	8	5	6	5
PF02152	Dihydroneopterin aldolase	2	2	2	2	2	2	2	2	2	2	2	2	1	2	2	3	2	2	2
PF02153	Prephenate dehydrogenase, nucleotide-binding domain	1	2	1	1	1	1	1	2	1	2	2	1	1	1	2	2	1	1	2
PF02162	XYPPX repeat (two copies)	2	2	2	2	2	2		2			1	1	1
PF02163	Peptidase family M50	4	3	4	4	4	3	4	3	3	4	3	3	3	4	4	5	8	7	5
PF02167	Cytochrome C1 family	3	2	8	2	2	2	8	2	2	2	2	3	1	2	2	6	1	2	2
PF02170	PAZ domain	15	17	25	22	25	27	24	24	16	23	21	21	19	18	21	32	27	40	23
PF02171	Piwi domain	19	22	23	24	20	21	24	28	17	24	22	20	16	18	23	28	21	26	23
PF02176	TRAF-type zinc finger	2	4	2	2	2	2	2	2	2	3	2	2	2	2	2	5	3	4	2
PF02178	AT hook motif	18	21	12	14	17	17	12	14	11	11	11	19	6	15	10	23	32	13	11
PF02179	BAG domain	11	10	11	10	10	8	8	7	9	13	8	10	7	9	11	10	12	13	11
PF02181	Formin Homology 2 Domain	21	22	23	16	19	19	23	20	16	17	20	22	14	17	19	16	22	27	17
PF02182	SAD/SRA domain	12	15	18	18	20	17	17	15	11	11	13	12	9	11	11	18	20	33	22
PF02183	Homeobox associated leucine zipper	24	24	24	24	24	24	22	24	25	22	26	27	21	25	23	29	27	26	25
PF02184	HAT (Half-A-TPR) repeat	1	1	1	2	3	3	1	2	3	3	3	2	3	3	3	3	1	5	2
PF02186	TFIIE beta subunit core domain	2	2	3	3	3	3	3	3	2	3	2	2	3	2	2	2	2	3	3
PF02190	ATP-dependent protease La (LON) substrate-binding domain	6	7	12	9	9	9	10	8	8	9	9	9	7	8	9	18	19	20	13
PF02194	PXA domain	1	2	2	2	2	2	2	2	2	2	2	2	2	2	2	4	4	6	3
PF02195	ParB/Sulfiredoxin domain	1	1	1	1	1	1	1	1	1	1	1	1	1	1	1	1	2	1	2
PF02201	SWIB/MDM2 domain	13	11	15	16	17	18	15	17	17	18	18	17	14	15	18	15	24	27	15
PF02204	Vacuolar sorting protein 9 (VPS9) domain	1		2	2	2	2	2	2	2	2	2	2	1	1	1	10	2	3	1
PF02207	Putative zinc finger in N-recognin (UBR box)	2	2	2	2	2	2	2	2	2	2	2	2	2	2	2	3	2	2	5
PF02209	Villin headpiece domain	2	3	5	5	5	5	5	5	6	5	5	5	2	5	5	3	9	9	6
PF02212	Dynamin GTPase effector domain	8	9	9	10	10	9	9	9	9	9	9	11	8	10	9	14	11	17	10
PF02213	GYF domain	6	7	9	9	8	10	9	8	9	11	9	9	7	8	9	6	12	17	10
PF02214	BTB/POZ domain	1	2	4	4	4	4	4	3	3	5	3	4	2	4	3	5	6	7	3
PF02219	Methylenetetrahydrofolate reductase	1	1	1	1	1	1	1	1	1	1	1	1	1			2	1	1	1
PF02221	ML domain	1	2	2	2	2	2	2	1	1	2	2	2	3	2	1	4	2	3	3
PF02222	ATP-grasp domain	1	1	1	1	1	1	1	1	1	1	1	1	1	1	1	4	1	1	1
PF02223	Thymidylate kinase	1	1	7	2	1	1	2	2	2	1	1	1	1	2	1	2	3	1	4
PF02225	PA domain	29	36	49	43	42	47	42	38	43	37	40	27	26	43	44	45	67	47	60
PF02229	Transcriptional Coactivator p15 (PC4)	2	2	2	2	2	2	2	2	3	2	2	2	1	2	2	3	2	3	3
PF02230	Phospholipase/Carboxylesterase	4	5	6	6	6	6	6	6	6	6	7	6	5	6	6	10	6	6	6
PF02234	Cyclin-dependent kinase inhibitor	3	2	6	4	7	5	5	5	6	4	5	6	6	6	5	6	7	5	5
PF02237	Biotin protein ligase C terminal domain				1	1	1	1	1	1					1			2		3
PF02238	Cytochrome c oxidase subunit VII	2	3	2	2	2	2	1	3	2	4	2	3	1	2	2	2	3	3	3
PF02245	Methylpurine-DNA glycosylase (MPG)	1	1	2		1	1	1	2	1	1	1	1	1	1	1	1	1	1	1
PF02254	TrkA-N domain	1	2	2	3	2	2	2	3	1	2	2	2	2	3		2	5	4	2
PF02256	Iron hydrogenase small subunit	1	1	1	1	1	1	1	1		1	1	1	1	1	1	2	1	1	1
PF02259	FAT domain	1	1	3	4	3	2	2	4	3	4	3	2	3	3	3	4	17	15	4
PF02260	FATC domain	3	5	5	6	5	4	2	6	3	4	2	3	5	3	3	7	16	23	6
PF02263	Guanylate-binding protein, N-terminal domain	4	4	4	4	4	4	4	4	4	4	4	4	3	3	4	2	4	4	4
PF02265	S1/P1 Nuclease	9	13	5	7	9	8	5	7	4	5	7	6	4	6	7	5	7	7	7
PF02268	Transcription initiation factor IIA, gamma subunit, helical domain	2	2	2	2	2	2	2	2	4	3	2	2	3	4	3	4	4	3	2
PF02269	Transcription initiation factor IID, 18kD subunit	1	1	1	1	1	1	1	1	1	1	1	1	1	1	1	1	1	1	2
PF02270	TFIIF, beta subunit HTH domain	3	2	2	3	3	3	2	3	3	3	3	3	2	3	3	3	2	1	2
PF02271	Ubiquinol-cytochrome C reductase complex 14kD subunit	2	2	2	2	2	2	2	2	4	4	2	3	2	2	3	7	2	3	7
PF02272	DHHA1 domain	2	2	3	4	4	4	3	4	1	2	2	2	3	2	2	2	2	2	2
PF02290	Signal recognition particle 14kD protein	1	1	1	1	1	1	1	1	1	1	1	1		1	1	1	1	1	1
PF02291	Transcription initiation factor IID, 31kD subunit	1	1	1	1	1	1	1	1	1	1	1	1	2	1	1	2	2	1	1
PF02296	Alpha adaptin AP2, C-terminal domain	1	1	1	1	1	1	1	1	1	1		1	1	1	1	1	1	1	2
PF02297	Cytochrome oxidase c subunit VIb	3	3	4	4	4	6	4	4	5	5	5	5	3	5	5	5	5	5	7
PF02298	Plastocyanin-like domain	68	68	68	72	67	57	58	63	62	72	69	66	46	66	65	61	66	74	57
PF02301	HORMA domain	2	4	3	4	4	5	3	4	3	5	5	4	2	3	5	8	4	7	3
PF02309	AUX/IAA family	40	46	49	44	44	46	43	46	46	44	52	50	47	50	41	90	58	64	62
PF02319	E2F/DP family winged-helix DNA-binding domain	12	11	11	12	12	11	10	12	10	11	10	11	9	10	10	12	16	16	10
PF02320	Ubiquinol-cytochrome C reductase hinge protein	3	3	3	2	3	3	3	3	3	3	3	3	4	3	3	2	3	3	3
PF02325	YGGT family	3	1	3	3	3	2	1	3	3	3	2	2	1	3	3	3	3	3	2
PF02326	Plant ATP synthase F0																3	1	1
PF02330	Mitochondrial glycoprotein	7	6	9	10	10	8	8	9	7	9	12	9	6	6	8	12	10	14	9
PF02338	OTU-like cysteine protease	12	10	14	10	13	13	13	13	11	13	13	14	7	9	12	38	36	27	24
PF02341	RbcX protein	2	2	3	3	3	3	3	3	3	4	2	3	1	2	2	4	3	3	3
PF02347	Glycine cleavage system P-protein	2	2	2	2	2	2	2	2	2	2	2	2	2	2	2	9	2	2	2
PF02348	Cytidylyltransferase	1	1	1	1	1	1	1	1	1	1	1	1	1	1	1	1	2	1	1
PF02353	Mycolic acid cyclopropane synthetase	9	7	6	4	3	6	6	4	5	4	5	4	2	6	3	5	12	7	4
PF02357	Transcription termination factor nusG			1	1	1	1	1	1	1	1	1	1	1			1	1	2
PF02358	Trehalose-phosphatase	16	17	23	22	21	21	24	22	23	22	24	26	18	19	28	44	26	38	30
PF02359	Cell division protein 48 (CDC48), N-terminal domain	3	3	5	3	6	2	2	2	4	6	5	5	2	4	5	4	6	5	6
PF02361	Cobalt transport protein			1	1	1	1	1	1	1	1	1	1		1	1	1	4	3	2
PF02362	B3 DNA binding domain	86	97	100	130	142	83	99	126	111	112	132	136	82	141	122	148	171	268	136
PF02364	1,3-beta-glucan synthase component	18	19	19	12	25	19	19	15	13	9	13	17	14	13	13	18	27	21	25
PF02365	No apical meristem (NAM) protein	124	119	135	137	138	120	124	121	137	147	140	165	86	139	129	167	175	182	153
PF02368	Bacterial Ig-like domain (group 2)			1	1	1	1			1	1	1	1	1	1	1			1	2
PF02373	JmjC domain, hydroxylase	13	15	17	13	14	14	16	15	13	14	15	14	15	14	14	15	34	23	19
PF02374	Anion-transporting ATPase	3	4	4	4	4	4	4	3	6	4	6	5	4	5	4	3	4	7	6
PF02375	jmjN domain	7	8	9	8	10	9	8	9	9	10	9	9	9	8	11	7	24	11	8
PF02383	SacI homology domain	12	13	11	12	10	10	10	13	10	10	9	9	7	10	8	12	9	12	19
PF02386	Cation transport protein	4	5	8	11	8	9	8	12	11	13	11	21	3	11	12	14	9	5	11
PF02390	Putative methyltransferase	3	2	3	3	3	3	3	3	3	4	2	4	3	3	4	5	4	11	3
PF02391	MoaE protein	1	2		1	1	1	1	1			1	1	1			1	1	1	1
PF02392	Ycf4				3	5											3	3		3
PF02401	LytB protein	1	1	2	2	1	1	1	3	2	2	4	2	1	2	2	2	2	1	2
PF02403	Seryl-tRNA synthetase N-terminal domain	4	3	4	3	3	2	4	4	6	3	2	7	3	3	5	5	5	2	3
PF02405	Permease MlaE			1	1	1	1	1	1	2		2	1		1			5	1	1
PF02410	Ribosomal silencing factor during starvation	3	2	2	2	2	2	2	2	2	2	3	2	2	3	1	3	3	2	4
PF02416	mttA/Hcf106 family	2	2	2	2	2	2	2	2	2	2	2	2	1	2	2	3	2	2	2
PF02419	PsbL protein																	3		2
PF02421	Ferrous iron transport protein B	1	1	1	1	1	1	1	1	1	1		1	1	1	1	1	1	7	2
PF02423	Ornithine cyclodeaminase/mu-crystallin family		1	1	1	1	1	1	1	1	1	1	1		1	1	1	1	1	1
PF02427	Photosystem I reaction centre subunit IV / PsaE	1	1	1	1	1	1	1	1	1	1	3	1	1	1	1	1	1	2	3
PF02428	Potato type II proteinase inhibitor family	3	4	1	4	2	1	1	3	3		2	3	1	4	1	1	4	3	1
PF02431	Chalcone-flavanone isomerase	5	5	5	5	5	4	6	5	3	5	4	7	3	3	4	6	7	4	3
PF02441	Flavoprotein	1	1	2	2	2	2	1	1	2	2	2	2	2	2	2	2	3	5	2
PF02445	Quinolinate synthetase A protein	1	1	1	1	2	2	1	1	1	1	1	1	1	1	1	3	5	1	1
PF02446	4-alpha-glucanotransferase	3	2	2	2	2	2	2	2	3	3	3	3	4	2	4	2	4	2	4
PF02450	Lecithin:cholesterol acyltransferase	26	26	21	22	26	15	16	18	20	18	19	22	12	20	22	19	14	14	19
PF02453	Reticulon	20	17	20	22	22	22	19	21	15	22	27	24	20	18	21	27	27	26	29
PF02458	Transferase family	161	144	115	129	138	111	91	133	126	142	149	171	63	127	146	152	114	130	132
PF02460	Patched SSD	1	1	2	2		2	2		2	2	2	1	2			1	2	2	2
PF02463	RecF/RecN/SMC N terminal domain	8	6	10	10	7	7	9	8	7	9	9	11	9	9	9	9	15	8	13
PF02466	Tim17/Tim22/Tim23/Pmp24 family	17	16	23	28	23	23	17	19	21	29	34	30	13	23	30	23	24	27	24
PF02468	Photosystem II reaction centre N protein (psbN)																		5	1
PF02469	Fasciclin domain	10	11	30	29	29	22	21	21	22	22	23	23	11	25	18	33	28	31	26
PF02470	MlaD protein		1	1	1	1	1	1	1	1	1	1	1		1	1	1	1	2	1
PF02475	TRM5/TYW2 methyltransferase domain	2	3	3	3	3	3	3	3	4	3	3	3	3	3	3	3	8	5	4
PF02482	Sigma 54 modulation protein / S30EA ribosomal protein	1	1	1	1	1	1	1	1	1	1	1	1		1		2	1	1	1
PF02485	Core-2/I-Branching enzyme	35	39	40	36	38	35	35	33	34	34	39	32	21	38	28	37	39	45	43
PF02492	CobW/HypB/UreG, nucleotide-binding domain	4	3	6	3	5	5	4	4	4	5	4	4	4	4	4	6	4	8	4
PF02493	MORN repeat	73	75	78	81	83	83	83	78	103	89	83	84	77	87	88	85	141	134	89
PF02496	ABA/WDS induced protein	9	7	7	8	9	9	8	8	8	5	8	8	7	8	5	7	7	9	7
PF02502	Ribose/Galactose Isomerase			1	1	1	1	1	1	1	1	1	1		1	1	1		1	1
PF02507	Photosystem I reaction centre subunit III	1	1	1	1	1	1	1	1	1	1	1	1	2	1	1	2	1	1	3
PF02514	CobN/Magnesium Chelatase	1	2	1	1	1	1	1	1	2	1	1	1		1	1	3	1	1	2
PF02516	Oligosaccharyl transferase STT3, N-terminal	3	3	3	4	3	4	3	3	2	3	4	3	2	2	3	3	3	3	4
PF02517	Type II CAAX prenyl endopeptidase Rce1-like	3	4	8	8	8	8	8	8	5	8	7	6	5	5	8	10	11	14	9
PF02518	Histidine kinase-, DNA gyrase B-, and HSP90-like ATPase	17	16	18	17	18	19	17	16	16	16	16	17	14	17	15	23	18	23	23
PF02519	Auxin responsive protein	26	27	64	56	67	33	23	32	52	52	59	62	1	48	49	59	73	76	72
PF02527	rRNA small subunit methyltransferase G	1	1	1	1	1	1	1	1	1	1	1	1		1	1		1	2	2
PF02529	Cytochrome B6-F complex subunit 5																	6		2
PF02531	PsaD	1	1		1	1	1	1	1	1	1	1					1	1	1	1
PF02532	Photosystem II reaction centre I protein (PSII 4.8 kDa protein)									1								2	1	2
PF02533	Photosystem II 4 kDa reaction centre component			3	1	5											4	2	1	3
PF02535	ZIP Zinc transporter	19	19	17	18	17	15	16	15	15	17	21	18	16	19	17	26	29	29	21
PF02536	mTERF	34	43	53	68	68	66	49	61	39	48	41	46	18	36	48	60	75	70	75
PF02537	CrcB-like protein, Camphor Resistance (CrcB)	2	2	2	2	2	2	2	2	2	2	2	2	2	2	2	10	2	2	2
PF02538	Hydantoinase B/oxoprolinase			1	1	1	1	1	1					1			1	1	1	1
PF02540	NAD synthase			1	1	1	1	1	1	1	1	1	1	1	2		2	4	1	1
PF02542	YgbB family	1	1	1	1	1	1	1	1	1	1	1	1	1	1	1	1	1	1	1
PF02544	3-oxo-5-alpha-steroid 4-dehydrogenase	4	4	6	8	7	9	7	8	6	6	7	5	4	7	3	6	14	5	8
PF02545	Maf-like protein	2	3	3	3	3	3	3	4	6	1	3	3	3	3	3	7	4	4	5
PF02548	Ketopantoate hydroxymethyltransferase	2	2	2	2	2	2	2	2	2	2	2	2	2	3	2	2	2	3	1
PF02551	Acyl-CoA thioesterase	2	1		1			1		1	1	1	1	1	1	1			1	1
PF02559	CarD-like/TRCF RID domain	1	1	1	1	1	1	1	1	1	1	1	1	1	1	1	2		1	1
PF02560	Cyanate lyase C-terminal domain			1	1	1	1	1	1	1	1	1	1		1	1	1	1	1
PF02567	Phenazine biosynthesis-like protein	3	3	5	5	4	5	3	4	3	8	5	6	2	5	6	2	4	11	7
PF02569	Pantoate-beta-alanine ligase	1	1	4	2	3	2	5	2	2	2	3	4		2	1	1	3	1	1
PF02574	Homocysteine S-methyltransferase	4	5	3	3	3	3	3	4	4	3	5	4	2	6	3	9	2	7	6
PF02575	YbaB/EbfC DNA-binding family	1	1	1	1	1	1	1	1	1	1	1	1	1	1	1	1	1	1	1
PF02576	RimP N-terminal domain	1		1	1	1	1		1	1	1		1		1	1		1	2	1
PF02577	Bifunctional nuclease domain	1	1	2	2	2	2	2	2	2	2	2	2	2	2	2	9	4	9	11
PF02580	D-Tyr-tRNA(Tyr) deacylase	1	2	1		1	1	1	1	1	1	1	1	1	1	1	1	1	1	1
PF02581	Thiamine monophosphate synthase	1	1	1	2	1	1	1	2	1	1	1	1	1	1	1	2	1	3	1
PF02582	RMND1/Sif2-Sif3/Mrx10, DUF155	2	2	2	2	2	2	2	2	2	1	2	2	2	2	2	4	3	3	3
PF02585	GlcNAc-PI de-N-acetylase	1	1	1	1	1	1	1	1	1	1	1	1	1	1	1	1	1	5	1
PF02586	SOS response associated peptidase (SRAP)	1	2	1	1	1	1	1	2	1	1	1	1	1	1	1	1	3	2	1
PF02590	Predicted SPOUT methyltransferase	2	1	1	1	1	1	1	1	1	1	1	1	1	1	1	1	2	5	1
PF02594	Uncharacterised ACR, YggU family COG1872	2	2	2	2	2	2	2	2	2	2	2	2	2	3	1	5	3	5	2
PF02597	ThiS family	2	2	1	1	2	2	1	1	2	2	2	2	1	1	2	1	1	1	1
PF02598	Putative RNA methyltransferase	1	1	1	1	1	1	1	1	1			2		1	1	2	1	2	1
PF02602	Uroporphyrinogen-III synthase HemD	2	2	4	4	4	4	3	2	2		2	2	1	1	1	2	2	2	4
PF02605	Photosystem I reaction centre subunit XI	1	1	1	1	1	1	1	1	1	1	1	1	1	1	1	2	1	1	1
PF02606	Tetraacyldisaccharide-1-P 4'-kinase	1	1	1	1	1	1	1	1	1	1	1	1	1	2		2	10	1	1
PF02617	ATP-dependent Clp protease adaptor protein ClpS	1	1	2	1	1	2	2	1	1	1	1	1	1	1	1	2	2	1	1
PF02620	Large ribosomal RNA subunit accumulation protein YceD	2	2	3	1	2	2	2	2	2	2	2	1		2	2	4	2	3	4
PF02622	AlgH-like	4	4	4	4	4	4	4	4	3	2	4	4	4	3	2	4	4	7	4
PF02628	Cytochrome oxidase assembly protein	2	2	2	4	2	4	2	5	2	4		2	2	2	2	1	1	1	2
PF02629	CoA binding domain	1	1	1	1	1	3	2	1	1	1	1	1	1	1	2	1	1	1	2
PF02630	SCO1/SenC	2	1	2	2	2	2	2	2	2	2	2	2	2	2	2	3	5	2	2
PF02631	RecX, second three-helix domain		1	1	1	1	1	1	1	1	1	1	1	1	1	1	2	1	2	3
PF02636	Putative S-adenosyl-L-methionine-dependent methyltransferase	2	2	2	2	2	2	2	2	2	2	2	2	2	4	1	3	3	3	2
PF02637	GatB domain	2		1	1	1	1	1	1	1	1	2	2	1	1	2	2	1	1	1
PF02657	Fe-S metabolism associated domain	1	2	2	3	4	4	2	2	2	2	2	2	2	2	2	3	6	4	3
PF02666	Phosphatidylserine decarboxylase	1	2	1	1	3	3	2	1	2	1	1	2	2	2	2	2	3	1	2
PF02668	Taurine catabolism dioxygenase TauD, TfdA family	4	4	3	3	3	3	3	3	2	2	2	2	3	2	2	2	3	4	2
PF02670	1-deoxy-D-xylulose 5-phosphate reductoisomerase	1	1	2	2	2	2	2	2	1	1	1	1	1	1	1	2	1	2	1
PF02671	Paired amphipathic helix repeat	9	10	21	21	21	27	16	17	7	15	16	13	3	11	15	9	16	16	13
PF02672	CP12 domain	4	3	4	4	4	3	2	1	4	5	5	5		4	5	5	5	5	5
PF02676	Methyltransferase TYW3	1	1	1	1	1	1	1	1	1	1	1	1	1	1	1	1	2	3	1
PF02678	Pirin	3	3	3	3	3	3	3	3	3	4	3	4	3	2	3	5	4	5	5
PF02679	(2R)-phospho-3-sulfolactate synthase (ComA)	1	1	1	1	1	1	1	1	1	1	1	1	1	1	1	4	1	2	1
PF02681	Divergent PAP2 family	6	7	6	5	6	6	6	6	6	6	6	7	6	6	6	8	8	8	7
PF02683	Cytochrome C biogenesis protein transmembrane domain	2	2	2	2	2	2	2	3	2	2	2	2	2	2	2	3	4	1	2
PF02684	Lipid-A-disaccharide synthetase		1	1	1	1	1	1	1	1	1	1	1	1		1	1	1	3
PF02686	Glu-tRNAGln amidotransferase C subunit		1	1	1	1	1	1	1	1	1		1	1	1	1	1	1	1	1
PF02689	Helicase				2				1				1
PF02696	Protein adenylyltransferase SelO	1	2	1	1	3	2	1	1	1	1	1	1	1	1	1	1	1	3	2
PF02698	DUF218 domain	1	1	1	1	1	1	1	1	1	1		1	1	1	1				1
PF02701	Dof domain, zinc finger	19	18	27	31	33	27	26	24	27	27	32	31	14	27	31	37	39	36	27
PF02704	Gibberellin regulated protein	11	10	12	10	10	4	6	11	8	13	12	12	9	9	12	15	14	13	10
PF02705	K+ potassium transporter integral membrane domain	43	42	27	30	31	32	29	29	28	31	31	35	25	28	29	48	41	45	35
PF02713	Domain of unknown function DUF220	1		1	1	1	1	1	1	1	1	1	1	1	1	1	1	1	2	1
PF02714	Calcium-dependent channel, 7TM region, putative phosphate	7	11	14	14	15	15	15	15	10	12	12	11	10	12	11	21	15	16	17
PF02719	Polysaccharide biosynthesis protein				1	1	1		1
PF02721	Domain of unknown function DUF223	2	1	8	13	13	7	13	13	8	5	5	9	2	5	4	23	9	11	9
PF02724	CDC45	2	2	1	2	2	1	3	3	1	2	1	3		2	4	2	2	2	4
PF02727	Copper amine oxidase, N2 domain	4	1	5	2	5	6	3	3	4	3	5	6	5	5	4	6	5	5	3
PF02728	Copper amine oxidase, N3 domain	5	2	4	4	7	8	4	5	7	6	6	7	5	7	6	6	8	9	4
PF02729	Aspartate/ornithine carbamoyltransferase, carbamoyl-P binding domain	2	2	2	2	2	2	2	2	2	2	2	2	2	2	2	2	3	3	2
PF02731	SKIP/SNW domain	1	1	2	1	1	1	1	2	2	1	2	2		1	2	2	1	2	1
PF02732	ERCC4 domain	3	1	3	3	4	3	3	3	4	3	3	4	3	3	3	3	15	7	4
PF02733	Dak1 domain	2	2	2	2	2	2	2	2	2	2	2	2		2	2	3	3	2	3
PF02734	DAK2 domain	2	3	2	3	2	2	2	3	2	2	2	2		2	2	3	3	2	2
PF02735	Ku70/Ku80 beta-barrel domain	2	3	2	2	2	2	2	2	3	2	4	3	2	2	1	2	4	5	3
PF02736	Myosin N-terminal SH3-like domain	4	7	9	6	8	5	8	7	7	6	7	8	7	9	5	4	12	13	9
PF02737	3-hydroxyacyl-CoA dehydrogenase, NAD binding domain	6	6	6	6	9	9	6	7	6	6	6	6	3	6	6	8	10	8	7
PF02738	Molybdopterin cofactor-binding domain	11	10	12	14	9	12	11	16	8	10	9	9	6	12	5	11	21	17	10
PF02739	5'-3' exonuclease, N-terminal resolvase-like domain	1	1	2	2	2	2	2	2	2	1	2	2	2	2	1	7	4	3	2
PF02744	Galactose-1-phosphate uridyl transferase, C-terminal domain		1
PF02746	Mandelate racemase / muconate lactonizing enzyme, N-terminal domain	1	1	1	1	1	1	1	1		1	1	1	1		1	1	1	1	3
PF02747	Proliferating cell nuclear antigen, C-terminal domain	3	3	10	3	2	2	6	9	3	10	9	4	3	5	8	1	1	8	1
PF02749	Quinolinate phosphoribosyl transferase, N-terminal domain	1	1	1	1	1	1	1	1	1	1	1	1	1	1	1	2	2	1	1
PF02751	Transcription initiation factor IIA, gamma subunit	2	2	2	2	2	2	2	2	3	3	2	2	3	3	3	4	4	2	2
PF02765	Telomeric single stranded DNA binding POT1/CDC13	1		1	1	1	1	1	1	1	1	1	1	1	1	1	1	1	6	1
PF02769	AIR synthase related protein, C-terminal domain	5	5	4	5	5	5	4	5	6	5	6	7	4	9	6	5	5	11	9
PF02770	Acyl-CoA dehydrogenase, middle domain	7	5	9	7	9	7	12	9	5	7	8	10	6	7	6	12	11	15	14
PF02771	Acyl-CoA dehydrogenase, N-terminal domain	6	5	7	6	6	4	11	6	5	5	6	6	4	4	5	7	5	11	12
PF02772	S-adenosylmethionine synthetase, central domain	1	1	3	3	3	3	3	3	3	3	3	3	2	3	3	10	4	4	3
PF02773	S-adenosylmethionine synthetase, C-terminal domain	1	1	3	3	3	3	3	3	3	3	3	3	2	3	3	8	4	4	3
PF02774	Semialdehyde dehydrogenase, dimerisation domain	2	2	2	3	3	3	2	3	2	2	2	2	2	3	2	3	2	2	3
PF02775	Thiamine pyrophosphate enzyme, C-terminal TPP binding domain	5	5	6	6	7	7	6	7	7	8	7	8	5	7	6	12	8	9	7
PF02776	Thiamine pyrophosphate enzyme, N-terminal TPP binding domain	6	5	6	7	7	7	5	7	7	8	8	7	4	7	7	16	9	7	7
PF02777	Iron/manganese superoxide dismutases, C-terminal domain	4	3	3	3	3	3	3	3	3	3	3	4	3	2	4	5	4	5	6
PF02778	tRNA intron endonuclease, N-terminal domain	1		1	1			1	1								3
PF02779	Transketolase, pyrimidine binding domain	12	11	14	15	13	13	13	15	12	13	14	17	12	14	10	21	16	19	18
PF02780	Transketolase, C-terminal domain	9	9	11	11	10	10	10	11	10	10	10	13	8	12	8	16	11	16	16
PF02781	Glucose-6-phosphate dehydrogenase, C-terminal domain	5	5	6	5	6	6	6	5	5	5	5	5	4	5	5	9	7	11	9
PF02782	FGGY family of carbohydrate kinases, C-terminal domain	5	4	5	6	5	5	5	4	4	5	5	5	3	6	3	8	8	7	6
PF02784	Pyridoxal-dependent decarboxylase, pyridoxal binding domain	8	6	6	7	8	6	4	4	8	4	5	10	2	5	7	8	7	7	5
PF02785	Biotin carboxylase C-terminal domain	2	2	3	3	3	3	3	3	3	4	4	5	2	5	3	3	4	5	5
PF02786	Carbamoyl-phosphate synthase L chain, ATP binding domain	9	8	5	5	5	5	6	7	5	6	6	8	4	7	5	5	6	8	9
PF02787	Carbamoyl-phosphate synthetase large chain, oligomerisation domain	2	2	1	1	1	1	1	1	1	1	1	1	1	1	1	1	1	1	2
PF02788	Ribulose bisphosphate carboxylase large chain, N-terminal domain				2	5				1				1	1		4	4	1	1
PF02789	Cytosol aminopeptidase family, N-terminal domain	2	2	3	1	2	2	1	2	4	1	2	2	1	5	1	2	2	4	4
PF02790	Cytochrome C oxidase subunit II, transmembrane domain			1	4	2												1		1
PF02791	DDT domain	7	10	10	10	8	10	10	10	11	11	9	10	9	10	10	11	14	20	10
PF02792	Mago nashi protein	2	2	3	2	2	2	2	2	2	2	2	2	2	2	2	4	3	2	3
PF02797	Chalcone and stilbene synthases, C-terminal domain	27	29	20	25	17	20	25	30	31	30	29	39	8	21	19	30	15	44	23
PF02798	Glutathione S-transferase, N-terminal domain	63	69	57	60	59	61	54	70	51	65	54	71	19	50	64	64	50	72	55
PF02799	Myristoyl-CoA:protein N-myristoyltransferase, C-terminal domain			2	1	1	1	1	1	1	1	1	1	1	1	1	1	1	1	1
PF02800	Glyceraldehyde 3-phosphate dehydrogenase, C-terminal domain	8	8	7	8	7	7	7	8	6	8	8	6	6	7	7	16	8	20	9
PF02801	Beta-ketoacyl synthase, C-terminal domain	6	6	6	6	6	6	6	6	6	5	7	6	5	6	5	6	8	7	7
PF02803	Thiolase, C-terminal domain	4	5	7	3	5	5	5	5	4	4	4	4	4	4	4	7	6	10	11
PF02806	Alpha amylase, C-terminal all-beta domain	4	4	3	3	5	4	4	4	3	6	3	3	4	3	5	12	6	7	3
PF02809	Ubiquitin interaction motif	3	3	3	3	3	3	3	3	8	3	5	8	3	7	4	6	3	5	12
PF02810	SEC-C motif			1		1	1	1	1	1	1	1	2		1	1	1	2	1	2
PF02811	PHP domain	2	2	2	2	2	1	2	2	2	1	2	2	1	2	2	2	2	13	3
PF02812	Glu/Leu/Phe/Val dehydrogenase, dimerisation domain	3	3	3	3	3	3	3	3	3	3	3	3	3	3	3	7	7	5	11
PF02815	MIR domain	1	1	2	2	2	2	2	2	2	2	2	2	2	3	1	2	2	2	2
PF02817	e3 binding domain	6	6	7	5	7	7	7	6	6	6	6	6	6	5	5	20	6	7	8
PF02823	ATP synthase, Delta/Epsilon chain, beta-sandwich domain	1	1	3	3	5	1	1	1	1	1	2	1	2	2	2	7	4	2	1
PF02824	TGS domain	5	6	6	5	5	5	6	5	7	6	6	6	4	5	7	4	6	4	6
PF02825	WWE domain		1	2	2	3	1	2	2	1	1	2	1	2			4	1	4	2
PF02826	D-isomer specific 2-hydroxyacid dehydrogenase, NAD binding domain	18	21	17	18	17	20	16	19	18	14	18	17	12	14	20	21	20	26	19
PF02836	Glycosyl hydrolases family 2, TIM barrel domain	2	2	1	1	1	1	1	1	2	1		1	1	1	1	1	1	3	2
PF02837	Glycosyl hydrolases family 2, sugar binding domain	1	1	1	1	1	1	1	1	2	1		1	1	1	1	1	1	3	2
PF02840	Prp18 domain			4	4	3	4	4	4	3	2	4	3	2	3	1	4	10	6	2
PF02841	Guanylate-binding protein, C-terminal domain	4	5	5	6	5	5	5	5	5	5	5	5	5	4	5	3	5	5	5
PF02843	Phosphoribosylglycinamide synthetase, C domain	2	2	3	3	4	3	3	3	2	3	2	2	3	2	3	4	4	9	1
PF02844	Phosphoribosylglycinamide synthetase, N domain	2	2	3	3	4	3	3	3	2	3	2	2	3	2	3	4	4	8	1
PF02845	CUE domain	4	5	6	3	6	6	6	3	6	3	5	6	4	6	5	9	12	9	7
PF02847	MA3 domain	17	13	18	18	18	18	22	18	18	14	20	19	18	19	20	29	20	20	21
PF02852	Pyridine nucleotide-disulphide oxidoreductase, dimerisation domain	6	6	8	6	7	7	7	7	7	7	7	7	7	7	7	12	8	8	8
PF02854	MIF4G domain	11	11	13	11	12	12	11	11	9	12	11	12	9	13	11	14	11	10	13
PF02861	Clp amino terminal domain, pathogenicity island component	32	30	36	36	37	35	35	30	30	35	36	37	29	32	35	34	40	33	41
PF02862	DDHD domain	1	2	2	2	2	2	2	2	2	2	2	2	4	2	2	2	4	2	2
PF02866	lactate/malate dehydrogenase, alpha/beta C-terminal domain	10	11	13	12	14	13	12	13	16	14	14	11	10	14	12	18	11	15	21
PF02867	Ribonucleotide reductase, barrel domain	3	3	3	1	2	3	2	3	3	4	3	3	2	3	4	2	3	2	3
PF02874	ATP synthase alpha/beta family, beta-barrel domain	6	6	10	11	20	7	7	8	7	7	9	7	6	10	7	17	17	13	11
PF02875	Mur ligase, glutamate ligase domain	1	1	1	1	1	1	1	1	1	1	1	1	2		1	1	1	1	1
PF02877	Poly(ADP-ribose) polymerase, regulatory domain	4	5	3	4	4	4	5	4	3	3	3	3	3	5	1	4	4	6	3
PF02878	Phosphoglucomutase/phosphomannomutase, alpha/beta/alpha domain I	8	6	6	9	7	6	6	9	5	6	6	6	6	6	5	12	8	7	5
PF02879	Phosphoglucomutase/phosphomannomutase, alpha/beta/alpha domain II	5	3	4	4	4	4	4	3	3	4	4	4	4	4	3	11	5	5	6
PF02880	Phosphoglucomutase/phosphomannomutase, alpha/beta/alpha domain III	4	2	4	4	4	4	4	3	3	4	4	4	4	4	3	11	5	5	6
PF02881	SRP54-type protein, helical bundle domain	8	7	8	7	8	6	7	5	7	8	8	8	6	8	10	12	10	11	8
PF02882	Tetrahydrofolate dehydrogenase/cyclohydrolase, NAD(P)-binding domain	3	3	3	3	3	3	3	3	3	3	3	3	2	3	3	4	4	4	3
PF02883	Adaptin C-terminal domain	4	5	5	2	4	4	4	4	4	4	3	7	3	4	4	7	9	6	7
PF02885	Glycosyl transferase family, helical bundle domain	1	1	1	1	1	1	1	1	1	2		1		1	1	2	1	2	1
PF02886	LBP / BPI / CETP family, C-terminal domain	1	2	2	2	2	2	2	2	2	2	2	2	2	2	2	3	2	2	4
PF02887	Pyruvate kinase, alpha/beta domain	8	9	11	11	11	11	11	10	11	11	10	11	10	10	10	14	12	14	15
PF02889	Sec63 Brl domain	8	8	6	9	10	9	6	8	4	4	5	7	5	6	4	10	8	14	9
PF02891	MIZ/SP-RING zinc finger	2	2	4	4	5	5	3	4	3	3	2	2	5	3	3	6	12	11	7
PF02892	BED zinc finger	5	10	27	29	29	40	18	35	16	12	20	22	11	22	19	19	14	7	8
PF02893	GRAM domain	12	10	19	19	20	20	20	19	18	17	18	19	16	19	17	19	28	26	20
PF02894	Oxidoreductase family, C-terminal alpha/beta domain	1	1	2	2	2	2	2	2	2	2	2	2	1	2	2	2	6	3	4
PF02896	PEP-utilising enzyme, PEP-binding domain	3	3	2	2	2	2	2	2	2	2	2	1	2	2	2	5	10	7	6
PF02897	Prolyl oligopeptidase, N-terminal beta-propeller domain	5	6	5	5	5	6	6	5	5	7	4	6	6	6	4	4	10	9	10
PF02900	Catalytic LigB subunit of aromatic ring-opening dioxygenase	2	2	3	3	3	2	3	2	2	1	1	1	2	1		3	1	2	4
PF02902	Ulp1 protease family, C-terminal catalytic domain	22	14	38	70	35	41	47	74	34	36	44	43	18	51	34	419	54	83	71
PF02906	Iron only hydrogenase large subunit, C-terminal domain	1	1	1	1	1	1	1	1		1	1	1	1	1	1	2	1	1	1
PF02910	Fumarate reductase flavoprotein C-term	3	4	5	4	5	5	4	5	4	3	4	4	3	4	3	4	5	4	3
PF02911	Formyl transferase, C-terminal domain			1	1	1	1	1	1	1	1	1	1		1	1	1	2	1	1
PF02913	FAD linked oxidases, C-terminal domain	2	2	2	3	2	2	2	3	2	2	2	2	1	3	1	1	2	4	4
PF02915	Rubrerythrin	1	1	1	1	1	1	1	1	1	1	1	1	1	1	1	2	1	1	2
PF02919	Eukaryotic DNA topoisomerase I, DNA binding fragment	1	1	1	1	1	1	1	1	1	1	1	1	1	1	1	1	1	2	3
PF02921	Ubiquinol cytochrome reductase transmembrane region	2	2	2	3	2	2	2	3	2	2	2	2	2	2	2	2	3	3	2
PF02922	Carbohydrate-binding module 48 (Isoamylase N-terminal domain)	7	5	7	8	9	9	8	8	6	8	6	6	7	6	8	16	11	20	11
PF02926	THUMP domain	2	1	2	2	2	2	2	2	2	2	2	2	2	2	2	3	2	2	2
PF02928	C5HC2 zinc finger	2	1	6	5	6	6	5	6	6	6	6	5	5	5	6	4	21	9	8
PF02929	Beta galactosidase small chain	1	1	1	1	1	1	1	1	2	1		1	1	1	1	1	1	4	2
PF02933	Cell division protein 48 (CDC48), domain 2	3	3	7	5	7	3	3	4	6	7	7	6	3	6	7	4	7	6	7
PF02934	GatB/GatE catalytic domain	2		1	1	1	1	1	1	1	1	2	3	1	1	1	2	1	1	1
PF02938	GAD domain	1	1	2	2	2	2	2	2	1	1	2	4	1	1	1	1	1	2	2
PF02941	Ferredoxin thioredoxin reductase variable alpha chain	1	1	1	2	2	2	2	1	1	1	2	1		2	1	2	2	2	2
PF02943	Ferredoxin thioredoxin reductase catalytic beta chain	1	1	1	1	1	1	1	1	1	1	1	1	2	1	1	2	1	1	1
PF02950	Conotoxin				1
PF02953	Tim10/DDP family zinc finger	8	9	8	9	10	9	8	8	8	9	8	9	6	8	7	8	10	10	9
PF02966	Mitosis protein DIM1	3	3	3	3	3	3	4	2	3	4	6	6	3	5	5	3	4	5	5
PF02969	TATA box binding protein associated factor (TAF)	1	1	1	1	1	1	1	1	2	2	2	2		2	2	1	1	3	1
PF02970	Tubulin binding cofactor A	1	1	2		1		1		2	1	1	1	1	2	1	1	1	1	3
PF02971	Formiminotransferase domain					1
PF02978	Signal peptide binding domain	5	4	5	5	5	4	4	4	5	5	6	4	4	5	5	4	8	8	5
PF02984	Cyclin, C-terminal domain	21	22	26	28	28	23	26	23	25	25	28	31	17	26	26	36	39	40	28
PF02985	HEAT repeat	10	12	8	6	8	9	2	8	5	7	5	5	7	4	10	9	13	10	7
PF02987	Late embryogenesis abundant protein	6	7	4	6	10	10	3	6	3	7	10	11	4	4	7	10	14	5	15
PF02990	Endomembrane protein 70	16	13	15	14	15	15	14	17	16	14	11	16	14	13	16	22	19	19	16
PF02991	Autophagy protein Atg8 ubiquitin like	4	4	4	4	4	4	4	4	4	4	4	3	2	3	4	11	5	6	12
PF02992	Transposase family tnp2			15	18	21	18	8	6	49	35	33	32	1	39	26	12			4
PF02996	Prefoldin subunit	4	4	4	4	4	4	4	4	3	4	4	4	3	4	4	7	5	7	5
PF03000	NPH3 family	32	28	31	28	28	27	29	28	30	30	30	29	22	31	27	49	48	53	35
PF03004	Plant transposase (Ptta/En/Spm family)		1	22	19	20	19	21	17	47	38	40	43	3	38	43	47	10	30	8
PF03006	Haemolysin-III related	10	8	7	7	8	7	7	7	8	5	9	9	8	7	8	6	7	9	8
PF03007	Wax ester synthase/diacylglycerol acyltransferase catalytic domain	5	6	6	6	5	3	6	8	6	7	7	6	7	5	9	4	9	5	11
PF03009	Glycerophosphoryl diester phosphodiesterase family	17	17	13	16	13	14	15	18	13	12	12	16	10	12	12	17	14	28	20
PF03015	Male sterility protein	8	7	8	12	9	9	10	12	12	12	10	12	5	12	10	10	8	17	10
PF03016	Exostosin GT47 domain	38	33	41	43	46	39	38	37	39	37	39	38	20	37	41	48	64	65	45
PF03017	TNP1/EN/SPM transposase	2		4	7	5	5	7	7	17	12	18	17	1	13	10	10	2	5	5
PF03018	Dirigent-like protein	60	43	70	93	59	48	55	85	46	36	43	58	7	36	37	61	47	74	47
PF03024	Folate receptor family			2	2	2	2	2	1	1	1		1	1	2	1	2	1	1	1
PF03029	Conserved hypothetical ATP binding protein	4	4	4	4	4	4	4	6	5	3	3	3	3	3	3	7	4	4	7
PF03030	Inorganic H+ pyrophosphatase	13	14	12	10	9	8	9	12	8	9	7	10	6	8	9	10	10	11	16
PF03031	NLI interacting factor-like phosphatase	16	17	22	19	22	22	19	22	18	21	18	21	16	19	17	40	45	31	26
PF03033	Glycosyltransferase family 28 N-terminal domain	2	2	6	7	4	5	4	6	4	3	3	3	3	4	3	7	5	6	6
PF03034	Phosphatidyl serine synthase	2	1	2	2	2	2	2	1	2	6	2	4	2	2	5	4	2	2	3
PF03040	CemA family	1	1	1	11	12	2	1	1	1	2	2	1	1	1	2	6	7	2	6
PF03054	tRNA methyl transferase HUP domain	1	1	2	2	2	2	2	2	2	2	2	2	2	2	2	1	2	6	2
PF03055	Retinal pigment epithelial membrane protein	20	15	21	16	20	19	18	13	19	15	17	15	11	19	13	18	14	21	14
PF03059	Nicotianamine synthase protein			3	3	3	1		3	1	3	4	5		1	1	3	4	5	4
PF03060	Nitronate monooxygenase	1	1	1	1	2	2	1	1	3	3	4	4	1	4	4	4	5	20	4
PF03061	Thioesterase superfamily	12	14	12	16	14	13	12	16	13	12	13	12	5	14	10	9	15	13	13
PF03062	MBOAT, membrane-bound O-acyltransferase family	3	2	4	4	5	4	4	4	3	3	4	4	3	3	4	4	6	4	4
PF03069	Acetamidase/Formamidase family	4	4	2	2	2	2	2	3	3	1	1	2		3	1	1	3	2	1
PF03070	TENA/THI-4/PQQC family	3	3	3	3	3	3	3	3	3	4	3	3	3	3	4	3	3	3	3
PF03071	GNT-I family	6	5	4	4	4	3	5	4	2	4	4	4	1	2	4	3	1	1	2
PF03073	TspO/MBR family	1	1	1	1	1	1	1		2	1		1		1	1	1	1	1
PF03078	ATHILA ORF-1 family					1	1		3								5	1
PF03079	ARD/ARD' family	6	5	4	4	4	4	4	4	5	3	3	4	3	5	3	4	4	5	8
PF03080	Neprosin	21	23	27	24	20	22	26	34	21	23	22	23	16	25	24	41	14	26	28
PF03081	Exo70 exocyst complex subunit C-terminal	20	23	36	41	36	38	35	35	23	34	29	25	22	21	36	65	37	48	47
PF03083	Sugar efflux transporter for intercellular exchange	43	47	45	52	46	42	44	48	39	41	43	34	44	48	34	43	49	55	58
PF03087	Protein BPS1	27	28	27	30	40	26	18	21	38	31	35	13	3	44	28	36	38	49	41
PF03088	Strictosidine synthase	17	15	25	15	24	23	12	13	15	17	27	26	9	15	17	22	24	24	32
PF03091	CutA1 divalent ion tolerance protein	1	1	2	2	2	2	2	2	2	1	3	2	1	2	2	2	2	1	4
PF03092	BT1 family	12	10	13	10	9	9	13	10	8	10	12	11	9	8	12	10	16	17	8
PF03094	Mlo family	23	25	22	17	17	24	23	17	23	20	18	17	14	16	23	18	19	27	17
PF03095	Phosphotyrosyl phosphate activator (PTPA) protein	1	1	1	1	1	1	1	1	1	1	1		2	1	1	1	1	1	1
PF03096	Ndr family	5	5	6	5	4	4	6	4	4	4	4	4	4	4	4	6	5	6	4
PF03097	BRO1-like domain	5	5	11	5	6	7	8	6	6	5	6	6	5	5	5	14	11	9	11
PF03098	Animal haem peroxidase	2		2	1	1	3	2	2		3	4	4			3	6	1
PF03099	Biotin/lipoate A/B protein ligase family	1	1	1	1	1	1	1	1	2	1	1	2	1	2	1	2	3	1	3
PF03100	CcmE domain	1	1	1	1	1	1	1	1		1	1	1		1	1	1	2	1	1
PF03101	FAR1 DNA-binding domain	8	9	55	64	54	69	61	84	50	42	74	61	29	46	40	86	81	94	53
PF03104	DNA polymerase family B, exonuclease domain	3	5	7	5	7	7	6	9	5	3	5	4	6	5	4	3	12	8	4
PF03105	SPX domain	16	16	17	17	19	18	19	20	17	18	18	18	19	14	15	24	22	32	22
PF03106	WRKY DNA -binding domain	72	75	115	116	114	107	110	112	112	115	117	117	95	108	115	149	165	156	126
PF03107	C1 domain	14	16	20	28	29	14	12	11	30	17	34	30	5	37	17	30	22	17	20
PF03108	MuDR family transposase	1		33	41	60	40	33	32	60	36	53	104	12	82	53	22	2		28
PF03109	ABC1 atypical kinase-like domain	16	18	18	14	17	17	17	16	21	15	18	18	15	23	15	28	23	26	28
PF03110	SBP domain	19	21	20	18	19	18	17	19	21	20	18	17	16	17	18	29	25	39	21
PF03114	BAR domain	1	1	2	1	1	1	1	1	2	2	1	1		2	2	1	2	1	2
PF03118	Bacterial RNA polymerase, alpha chain C terminal domain			1	1	5											5	3		1
PF03121	Herpesviridae UL52/UL70 DNA primase	1	1	1	1	1	1	1	1	1	1	1	1	1	1	1	2	1	4	1
PF03124	EXS family	6	5	6	5	4	4	4	8	6	5	5	6	5	5	5	4	4	7	4
PF03126	Plus-3 domain	3	4	8	8	9	9	8	9	7	8	7	7	5	5	7	8	12	14	7
PF03127	GAT domain	10	10	10	11	10	10	10	14	10	11	9	10	8	8	10	15	15	21	12
PF03128	CXCXC repeat																			1
PF03129	Anticodon binding domain	9	9	9	9	10	9	9	8	11	8	9	11	9	10	8	11	11	12	9
PF03130	PBS lyase HEAT-like repeat									1	1			1
PF03131	bZIP Maf transcription factor								1
PF03133	Tubulin-tyrosine ligase family	1	2	1	1	1	1	1	1	1	1	1	1	1	1	1	2	1	5	1
PF03134	TB2/DP1, HVA22 family	14	13	15	13	15	13	14	14	13	15	15	15	11	12	13	24	17	20	20
PF03140	Plant protein of unknown function	53	66	63	65	54	42	35	51	46	47	43	72	19	49	43	85	50	50	57
PF03141	Putative S-adenosyl-L-methionine-dependent methyltransferase	29	33	26	27	31	31	28	33	31	28	25	33	26	27	22	38	31	48	32
PF03143	Elongation factor Tu C-terminal domain	11	14	12	14	13	14	14	14	13	12	14	13	14	12	12	12	19	17	19
PF03144	Elongation factor Tu domain 2	20	23	22	28	23	23	23	26	26	27	26	30	22	25	27	24	36	32	31
PF03145	Sina, TRAF-like domain	6	6	6	6	6	6	5	6	6	6	6	6	6	7	5	6	9	12	7
PF03147	Ferredoxin-fold anticodon binding domain	1	1	1	1	1	1	1	1	1	1	1	1	1	1	1	1	1	3	1
PF03151	Triose-phosphate Transporter family	29	32	40	47	43	43	40	49	41	40	40	47	32	40	46	73	45	58	53
PF03152	Ubiquitin fusion degradation protein UFD1, N-terminal subdomain 1	4	4	4	4	5	4	4	4	7	7	7	7	3	6	8	5	8	7	13
PF03153	Transcription factor IIA, alpha/beta subunit	2	2	4	4	4	4	4	4	2	2	2	2	2	2	2	2	2	2	2
PF03155	ALG6, ALG8 glycosyltransferase family	3	2	4	2	2	2	2	2	2	2	2	2	2	2	2	2	2	7	3
PF03157	High molecular weight glutenin subunit																1
PF03159	XRN 5'-3' exonuclease N-terminus	8	8	6	6	7	6	5	8	6	6	8	11	3	6	4	7	5	10	6
PF03161	LAGLIDADG DNA endonuclease family	1	1	1	1	1	1	1	1	1	1	1	1	1	1	1	1	1	1	1
PF03162	Tyrosine phosphatase family	4	4	4	3	5	4	3	4	4	3	3	3	3	3	3	5	5	5	6
PF03167	Uracil DNA glycosylase superfamily			1	1	2	2	1	1	1	1	1	1	1	1	1	1	1	1	1
PF03168	Late embryogenesis abundant protein	29	27	45	49	50	33	33	35	45	44	49	52	10	46	42	56	51	59	48
PF03169	OPT oligopeptide transporter protein	38	35	35	42	40	39	37	49	35	38	32	34	21	36	32	36	41	39	36
PF03171	2OG-Fe(II) oxygenase superfamily	130	133	128	131	126	103	103	115	106	119	124	128	68	97	108	137	131	158	137
PF03175	DNA polymerase type B, organellar and viral							1
PF03177	Non-repetitive/WGA-negative nucleoporin C-terminal	1	1							1		1						1	1
PF03178	CPSF A subunit region	4	4	4	4	4	4	4	5	3	4	4	4	4	4	4	5	9	5	7
PF03179	Vacuolar (H+)-ATPase G subunit	2	2	2	2	1	1	2	2	2	2	2	2	2	2	2	3	3	3	3
PF03181	BURP domain	12	15	23	21	18	17	20	22	16	19	22	30	8	17	18	25	19	12	17
PF03188	Eukaryotic cytochrome b561	16	16	18	17	19	19	18	19	18	17	17	19	17	18	22	20	18	19	21
PF03190	Protein of unknown function, DUF255	1	1	1	1	1	1	3	1	1	1	1	1	1	1	1		1	1	2
PF03193	RsgA GTPase	1	1	1	1	1	1	1	1	1	2	1	1	1	1	1	1	2	1	2
PF03194	LUC7 N_terminus	4	4	5	5	5	5	5	5	4	5	5	5	7	2	3	11	8	14	12
PF03195	Lateral organ boundaries (LOB) domain	27	28	32	34	35	31	30	28	32	30	29	39	22	34	32	40	38	41	32
PF03199	Eukaryotic glutathione synthase	2	2	3	3	3	2	3	5	3	3	1	3	3	3	3	5	4	3	5
PF03200	Glycosyl hydrolase family 63 C-terminal domain	1	1	2	1	1	1	1	1	1	1	1	1	1	1	1	2	6	1	1
PF03208	PRA1 family protein	11	11	13	12	12	11	10	8	10	13	14	12	2	9	14	15	23	19	12
PF03209	PUCC protein																2		1
PF03214	Reversibly glycosylated polypeptide	3	3	3	3	3	3	3	4	3	3	4	3	3	3	4	4	4	4	4
PF03215	Rad17 P-loop domain	1	1	1	1	1	1	1	1	1		1	1	2	1	1	1	6	1	1
PF03219	TLC ATP/ADP transporter	2	2	2	3	3	3	3	2	4	3	2	3	2	4	3	7	3	2	2
PF03222	Tryptophan/tyrosine permease family	2	2	3	2	3	3	3	4	4	4	3	3	2	4	5	8	6	4	4
PF03223	V-ATPase subunit C	1	1	1	1	1	1	1	1	2	1	1	2		1	1	2	1	2	2
PF03224	V-ATPase subunit H	1	1	2	2	2	2	2	2	2	2		1	1	1	2	2	2	4	2
PF03226	Yippee zinc-binding/DNA-binding /Mis18, centromere assembly	4	6	9	10	11	8	8	8	9	8	11	8	8	6	9	9	11	11	11
PF03227	Gamma interferon inducible lysosomal thiol reductase (GILT)	3	3	3	4	3	3	4	3	2	3	1	2	1	2	2	3	4	3	2
PF03242	Late embryogenesis abundant protein (LEA_3a subfamily)	7	6	9	6	5	4	5	5	6	5	7	7	5	4	8	6	9	8	9
PF03244	Photosystem I reaction centre subunit VI	1	1	1	1	1	1	1	1	1	1	1	1		1	1	1	1	1	1
PF03248	Rer1 family	2	1	2	2	2	3	3	2	1	3	2	2	2	3	3	3	4	2	2
PF03254	Xyloglucan fucosyltransferase	16	21	33	19	18	24	20	26	25	25	26	27	11	19	22	22	22	22	21
PF03256	Anaphase-promoting complex, subunit 10 (APC10)	2	1	2	2	2	3	2	2	1	1	1	1	1	1	1	1	4	1	2
PF03266	NTPase	1	1	1	1	1	1	1	1	1	1	1	2	1		1		1	1	1
PF03271	EB1-like C-terminal motif	3	2	2	2	2	2	2	2	3	2	3	5	2	2	3	2	2	2	2
PF03283	Pectinacetylesterase	17	18	11	17	13	14	12	15	12	13	13	13	10	13	12	13	25	17	25
PF03291	mRNA (guanine-N(7))-methyltransferase domain		1	2	2	2	3	2	2	2	2	2	4	2	2	2	3	3	5	2
PF03297	S25 ribosomal protein	2	2	2	2	2	2	2	2	4	3	2	7		3	3	5	2	3	1
PF03311	Cornichon protein	1	1	2	2	2	2	2	2	2	2	1	2	2	1	2	3	2	2	2
PF03317	ELF protein																1	2	1	1
PF03318	Clostridium epsilon toxin ETX/Bacillus mosquitocidal toxin MTX2										1							1
PF03321	GH3 family N-terminal domain	17	26	24	21	15	25	20	20	19	19	20	20	13	18	16	22	19	16	18
PF03328	HpcH/HpaI aldolase/citrate lyase	1	1	1	1	1	1	1	1	1	1	1	1		1	1	1	1	1	1
PF03330	Lytic transglycolase	59	64	67	69	70	63	66	62	66	65	59	75	38	61	63	66	78	95	74
PF03331	UDP-3-O-acyl N-acetylglycosamine deacetylase	1	1	1	1	1	1	1	1	1		1	1	1	1	1	3	2	3	3
PF03332	Eukaryotic phosphomannomutase	3	1	1	1	1	1	1	1	1	1	6	2	1	1	2	2	1	26	1
PF03343	SART-1 family	2	2	2	2	4	4	2	2	2	4	4	4	2	4	2	4	2	2	6
PF03345	OST48, N-terminal domain	2	2	1	1	1	1	1	1	1	1	1	1	1	1	1	1	1	1	1
PF03348	Serine incorporator (Serinc)	6	12	10	9	9	9	11	9	13	8	7	10	4	12	8	8	11	21	8
PF03350	Uncharacterized protein family, UPF0114	2	2	2	2	2	2	2	2	2	4	2	2	3	4	3	9	3	3	3
PF03351	DOMON domain	3	3	3	5	4	4	4	5	1	3	3	1	2	1	3	5	7	5	7
PF03352	Methyladenine glycosylase	5	7	6	6	6	6	5	6	6	5	7	6	5	6	7	8	8	7	6
PF03357	Snf7	13	15	15	15	15	15	15	15	15	15	17	17	13	15	16	28	16	20	18
PF03358	NADPH-dependent FMN reductase	10	10	10	10	8	8	9	10	5	7	7	9	9	6	7	8	9	13	10
PF03360	Glycosyltransferase family 43	10	10	10	10	10	10	10	10	11	11	11	12	8	11	11	18	10	15	11
PF03364	Polyketide cyclase / dehydrase and lipid transport	4	5	5	5	6	6	5	5	5	5	5	5	6	3	3	8	5	7	6
PF03366	YEATS family			1	1	1	1	1	1	1	1	1	2	1	1	1	1	2	2	1
PF03367	ZPR1 zinc-finger domain	2	2	2	2	2	2	2	2		2	2	2	2	2	2	2	2	2	4
PF03368	Dicer dimerisation domain	4	2	5	5	5	5	5	5	2	4	4	5	5	5	4	5	7	12	6
PF03371	PRP38 family	3	3	3	3	4	3	3	3	5	3	5	3	4	5	3	4	3	6	4
PF03372	Endonuclease/Exonuclease/phosphatase family	15	13	30	53	31	34	29	44	28	35	38	41	19	33	38	33	79	42	31
PF03378	CAS/CSE protein, C-terminus	1	2	1	1	1	1	1	1	1	1	2	1	1	1	1	1	2	1	1
PF03381	LEM3 (ligand-effect modulator 3) family / CDC50 family	6	5	9	5	6	6	8	5	8	9	6	8	4	8	8	9	9	10	11
PF03385	STELLO glycosyltransferases	2	2	1	2	2	2	2	2	2	2	2	2	1	2	2	3	2	2	2
PF03386	Early nodulin 93 ENOD93 protein	6	5	6	7	6	8	5	7	3	5	4	5	4	3	4	11	9	9	9
PF03398	Regulator of Vps4 activity in the MVB pathway	18	16	12	12	12	13	12	12	10	12	12	12	8	11	12	11	11	13	13
PF03399	SAC3/GANP family	4	4	4	4	4	4	4	4	4	5	3	4	3	4	3	9	15	12	4
PF03404	Mo-co oxidoreductase dimerisation domain	6	6	8	6	6	7	7	7	6	5	6	6	6	7	6	5	6	5	5
PF03405	Fatty acid desaturase	11	7	11	14	9	8	10	9	11	9	10	8	5	11	9	10	12	14	9
PF03407	Nucleotide-diphospho-sugar transferase	26	29	32	30	30	26	24	24	20	23	25	24	12	25	19	17	27	34	26
PF03416	Peptidase C54 catalytic domain	1	1	1	1	1	1	1	1	2	2	1	2	1	2	2	5	1	1	3
PF03417	Acyl-coenzyme A:6-aminopenicillanic acid acyl-transferase	1	1	1	1	1	1	1	1	1	1	1	1	1	2	1	2	1	1	1
PF03435	Saccharopine dehydrogenase NADP binding domain	6	5	6	5	5	6	5	5	5	7	6	7	4	6	9	4	6	5	10
PF03439	Early transcription elongation factor of RNA pol II, NGN section	3	3	3	2	3	3	3	3	3	3	3	3	1	3	3	2	5	3	3
PF03441	FAD binding domain of DNA photolyase	4	6	6	5	5	6	5	5	4	6	5	5	5	4	6	12	7	10	8
PF03446	NAD binding domain of 6-phosphogluconate dehydrogenase	11	5	10	10	11	9	9	10	10	10	11	9	7	11	8	12	12	13	12
PF03447	Homoserine dehydrogenase, NAD binding domain		2	4	2	2	3	4	4	4	4	3	5	1	3	4	3	4	1	5
PF03450	CO dehydrogenase flavoprotein C-terminal domain	6	5	9	12	6	10	9	12	8	8	9	9	7	10	5	8	21	17	10
PF03453	MoeA N-terminal region (domain I and II)		1	1	2	1	1	1	2	1	1	1	1	1	1	1		1	1	1
PF03454	MoeA C-terminal region (domain IV)		1	1	1	1	1	1	1	1	1	1	1	1	1	1	2	1	1	1
PF03455	dDENN domain	1			1	1	1	1	1	1		1			1	1	1	1	1
PF03456	uDENN domain	1	2	4	2	3	3	3	3	2	3	3	2	3	3	3	10	3	3	10
PF03460	Nitrite/Sulfite reductase ferredoxin-like half domain	2	4	6	2	4	4	4	4	4	4	4	4	2	4	4	10	6	4	6
PF03461	TRCF domain			1	1	1	1	1	1			1		1					1
PF03462	PCRF domain	6	5	5	4	5	5	5	5	5	6	6	6	5	5	5	9	10	9	5
PF03463	eRF1 domain 1	2	2	4	6	5	5	4	5	3	7	4	4	4	4	4	9	4	6	6
PF03464	eRF1 domain 2	2	2	4	5	5	5	4	5	3	6	4	4	3	4	4	9	4	6	6
PF03465	eRF1 domain 3	2	2	4	4	4	4	4	4	3	6	4	4	3	4	4	8	4	5	6
PF03467	Smg-4/UPF3 family	2	1	1	1	1	1	1	1	1	1	1	1	1	1	1	1	1	2	1
PF03468	XS domain	12	13	12	12	10	10	13	13	13	12	10	12	12	13	11	11	26	23	15
PF03469	XH domain	15	17	14	13	15	13	14	16	12	14	11	12	17	11	14	12	25	26	16
PF03470	XS zinc finger domain	6	8	8	10	7	8	9	10	8	6	7	9	7	8	7	7	20	10	8
PF03471	Transporter associated domain		1	1	1	1	1	1	1	1	1	1	1	1	1	1	1	2	1	1
PF03473	MOSC domain	2	2	4	4	3	3	4	4	3	3	2	3	2	3	3	3	8	5	4
PF03476	MOSC N-terminal beta barrel domain	3	5	4	4	3	3	4	4	3	3	2	4	2	3	3	3	8	5	4
PF03477	ATP cone domain	2	2	3	1	2	2	2	2	3	3	3	3	2	3	3	2	2	2	2
PF03478	KIB1-4 beta-propeller	143	135	127	196	148	124	87	144	159	214	199	218	69	145	204	259	134	226	204
PF03479	Plants and Prokaryotes Conserved (PCC) domain	17	16	27	23	26	25	25	24	26	26	22	28	12	29	25	35	48	36	25
PF03483	B3/4 domain	1	2	1	2	1	2	1	1	1	1	1	1	2	1	1	2	2	2	2
PF03484	tRNA synthetase B5 domain	1	1	1	2	1	1	1	1	1	1	1	1	2	1	1	2	2	2	2
PF03485	Arginyl tRNA synthetase N terminal domain	2	1	1	2	1	1	1	2	2	2	2	2	2	2	3	3	2	2	1
PF03486	HI0933-like protein Rossmann domain	1	1	1	1	1	1	1	1	2	1	1	1	1	3		6	1	1	1
PF03489	Saposin-like type B, region 2	10	8	10	10	11	12	12	11	10	11	10	10	10	11	11	18	26	24	28
PF03492	SAM dependent carboxyl methyltransferase	25	27	32	26	22	25	28	36	13	24	20	26	10	18	22	58	28	39	17
PF03501	Plectin/S10 domain	2	2	2	4	4	4	2	4	2	2	2	2	2	2	2	3	2	2	2
PF03514	GRAS domain family	53	69	68	80	76	70	57	67	34	40	43	44	7	56	52	73	76	102	64
PF03517	Regulator of volume decrease after cellular swelling	1	2	2	2	2	2	2	2	1	2	2	3	1	1	2	4	2	1	2
PF03522	Solute carrier family 12	4	4	4	4	4	4	4	4	4	4	4	4	4	4	4	4	8	6	4
PF03531	Structure-specific recognition protein (SSRP1)	2	4	3	3	3	3	3	3	2	3	3	3	2	2	3	3	8	3	3
PF03540	Transcription initiation factor TFIID 23-30kDa subunit	1	1	1	1	1	1	1	1	1	1	1	1	1	1	1	1	1	4	3
PF03547	Membrane transport protein	28	30	21	22	18	23	22	23	23	19	27	24	16	23	14	31	23	37	27
PF03552	Cellulose synthase	48	47	50	65	63	55	59	60	49	53	48	54	39	50	39	64	49	71	51
PF03556	Cullin binding	3	3	3	3	3	3	3	3	4	4	4	5	4	4	3	5	6	5	6
PF03568	Peptidase family C50	1	1	2		1	1	1	1	2	1	1	2		1	1	1	1	4	2
PF03571	Peptidase family M49	1	1	2		1	1	1	1	1		1	1	1	1	1	1	1	1	1
PF03572	Peptidase family S41	3	4	4	2	3	3	3	3	2	2	2	2	2	2	2	3	5	4	8
PF03578	HGWP repeat																21
PF03587	EMG1/NEP1 methyltransferase	1	1	1	1	1	1	1	1	1	1	1	1	1	2		1	2	2	3
PF03595	Voltage-dependent anion channel	7	8	8	8	9	6	6	7	7	9	9	7	7	9	7	13	11	19	8
PF03600	Citrate transporter	5	5	7	5	5	6	6	6	6	6	6	7	5	7	6	25	11	16	13
PF03602	Conserved hypothetical protein 95	2	2	2	2	2	2	2	2	2	2	2	2	2	3	1	3	4	4	2
PF03604	DNA directed RNA polymerase, 7 kDa subunit	1	1	1	2	2	2	1	1	2	2	2	2		2	2	3	4	2	4
PF03618	Kinase/pyrophosphorylase	1	1	1	1	1	1	1	1	1	1	1	1	2	1	1	2	2	3	1
PF03619	Organic solute transporter Ostalpha	8	10	8	10	8	8	8	14	7	8	6	8	7	7	7	13	14	12	10
PF03629	Carbohydrate esterase, sialic acid-specific acetylesterase	6	4	6	5	6	5	6	4	2	5	5	7	5	5	2	7	5	6	7
PF03630	Fumble	3	3	3	3	3	3	4	2	3	3	3	3	7	3	3	4	5	5	4
PF03634	TCP family transcription factor	8	7	19	19	21	20	16	18	15	18	17	18	5	18	20	23	22	27	20
PF03635	Vacuolar protein sorting-associated protein 35	1	2	1	3	1	1	1	3	1	1	2	2	1			1	1	1	1
PF03637	Mob1/phocein family	5	5	6	5	4	6	6	3	4	3	6	5	3	6	4	5	4	6	4
PF03638	Tesmin/TSO1-like CXC domain, cysteine-rich domain	11	10	17	19	19	17	17	18	18	24	18	20	22	25	17	36	34	26	19
PF03639	Glycosyl hydrolase family 81 N-terminal domain		1	1	1	1	1	1	1		1	1	1	1		1	1	3	2	1
PF03641	Possible lysine decarboxylase	14	12	12	14	14	13	12	13	11	12	14	12	10	17	11	19	11	20	14
PF03643	Vacuolar protein sorting-associated protein 26	2	3	2	2	2	4	2	2	2	3	3	2	2	1	3	2	2	2	1
PF03644	Glycosyl hydrolase family 85	1	1	1	1	1	1	1	1	1	1	1	1	1	1	1	2	1	1	1
PF03647	Transmembrane proteins 14C	5	3	7	7	7	7	7	6	8	9	7	9	6	7	8	8	9	10	7
PF03649	Uncharacterised protein family (UPF0014)	5	6	4	4	3	2	3	3	1	5	5	3	2	1	3	1	3	3	4
PF03650	Mitochondrial pyruvate carriers	5	4	5	5	5	5	5	4	5	6	5	6	3	5	6	10	6	6	5
PF03652	Holliday junction resolvase	2	2	3	2	2	2	2	2	2	2	2	2	3	2	2	2	8	5	2
PF03656	Pam16	2	2	2	2	2	2	2	2	2	2	2	2	1	2	2	1	2	5	3
PF03657	UPF0113 PUA domain	1	2	2	2	2	1	2	2	1	2		1	2	1	1	1	2	1	2
PF03660	PHF5-like protein	1	1	2	2	2	2	2	2	1	1	2	1		2	2	3	3	2	2
PF03661	Transmembrane protein 33/Nucleoporin POM33	1	1	3	3	4	4	3	3	2	3	4	3	3	3	3	5	6	10	6
PF03662	Glycosyl hydrolase family 79, N-terminal domain	4	5	7	4	7	7	6	7	4	4	4	6	4	4	4	8	6	4	5
PF03665	Uncharacterised protein family (UPF0172)	1	1	1	1	1	1	1	1	1	1	1	1	1	1	3	1	1	3	2
PF03669	PAT complex subunit Asterix	1	1	1	2	1	1		1		1	1	1	1	1	1	1	1	1
PF03671	Ubiquitin fold modifier 1 protein	1	1	1	1	1	1		1	1	1	1	1	1		1	1	1	1	2
PF03676	Phagosome assembly factor 1	1	1	1	1	1	1	1	1	1	1	1	1	1	1	1	3	1	3	4
PF03690	Uncharacterised protein family (UPF0160)	2	2	1	1	3	3	1	1	2	2	3	2	2	2	2	1	2	1	3
PF03692	Putative zinc- or iron-chelating domain	1	1	1	1	1	1	1	1		1	1	1	1	1	1	2	2	2	1
PF03694	Erg28 like protein	7	7	7	4	4	3	5	4	4	4	4	5	10	4	13	1	4	2	9
PF03703	Bacterial PH domain	1	1	1	1	2	2	2		1	1		1		1	2	1	2	1	2
PF03704	Bacterial transcriptional activator domain				1
PF03711	Orn/Lys/Arg decarboxylase, C-terminal domain	1	1	1	1	1	1	1			1			1			3	8	7
PF03715	Noc2p family	2	2	3	2	2	2	4	2	4	2	2	2	2	3	1	2	4	3	2
PF03719	Ribosomal protein S5, C-terminal domain	3	3	4	4	5	5	4	4	4	4	4	4	4	3	3	7	4	8	4
PF03720	UDP-glucose/GDP-mannose dehydrogenase family, UDP binding domain	2	4	5	4	5	5	4	3	4	4	4	3	3	5	3	8	8	7	6
PF03721	UDP-glucose/GDP-mannose dehydrogenase family, NAD binding domain	2	3	6	5	5	5	4	3	5	4	4	3	3	6	4	8	8	8	6
PF03725	3' exoribonuclease family, domain 2	6	9	7	8	8	8	7	8	9	8	9	8	7	11	7	11	34	14	10
PF03726	Polyribonucleotide nucleotidyltransferase, RNA binding domain	1	1	1	1	1	1	1	1	1		1	1	1	1	1		1	2	1
PF03727	Hexokinase	7	7	7	9	8	8	7	7	7	8	7	7	6	7	7	12	9	8	6
PF03730	Ku70/Ku80 C-terminal arm	1	2	2	2	2	2	2	2	2	2	3	3	2	2	1	2	4	3	3
PF03731	Ku70/Ku80 N-terminal alpha/beta domain	2	2	2	2	2	2	3	2	1	1	4	3	2	2	1	2	4	5	3
PF03732	Retrotransposon gag protein	8	13	36	53	38	10	15	23	35	33	33	27	11	39	49	98	5	3	1
PF03735	ENT domain	7	8	10	10	12	12	9	10	10	9	8	11	8	10	10	18	20	19	13
PF03737	Aldolase/RraA	1	3	2	2	2	2	2	2	4	3	4	2	1	2	3	7	3	4	3
PF03741	Integral membrane protein TerC family		1	1	1	1	1	1	1	1	1	1	1	1	1	1	2	5	1	2
PF03742	PetN																		1
PF03745	Domain of unknown function (DUF309)	2	2	2	1	2	2	1	2	2	2	1	3	1	2	2	2	2	2	2
PF03754	B3 domain-containing protein At2g31720-like	1	1	1	1						1	1	1		2				1	1
PF03759	PRONE (Plant-specific Rop nucleotide exchanger)	13	13	13	17	16	16	13	12	12	13	11	11	11	13	10	18	15	15	12
PF03760	Late embryogenesis abundant (LEA) group 1	4	4	6	5	6	4	3	3	5	4	4	4	3	5	4	5	5	5	5
PF03763	Remorin, C-terminal region	16	15	22	18	19	20	19	19	20	22	17	22	18	20	17	30	41	30	22
PF03764	Elongation factor G, domain IV	5	10	5	7	6	6	5	6	9	10	10	10	6	9	10	8	12	8	9
PF03765	CRAL/TRIO, N-terminal domain	18	17	21	21	24	24	18	19	20	24	22	21	20	21	22	34	38	42	31
PF03766	Remorin, N-terminal region	3	3	3	3	3	3	3	3	4	3	2	4	3	3	3	6	3	3	2
PF03767	HAD superfamily, subfamily IIIB (Acid phosphatase)	10	11	11	10	14	9	8	9	11	10	10	10	4	11	8	19	11	18	13
PF03770	Inositol polyphosphate kinase			1	1	1	1	1			1		1	1		1	1	1	1	1
PF03776	Septum formation topological specificity factor MinE			1	1	1	1	1	1	1	1	1	1	1		2	1	1	1	1
PF03784	Cyclotide family																		1	3
PF03789	ELK domain	8	9	9	9	9	9	9	8	9	9	9	9	9	10	8	22	15	11	13
PF03790	KNOX1 domain	9	9	10	10	10	10	10	10	10	11	9	10	10	11	9	21	16	11	12
PF03791	KNOX2 domain	9	10	10	11	10	10	10	10	10	11	9	12	10	11	9	21	16	11	12
PF03796	DnaB-like helicase C terminal domain				1	1	1	1	1	1	1	1	1		1	1	1	1	2	1
PF03798	TLC domain	11	10	13	14	12	12	12	14	13	12	12	12	8	13	11	20	12	24	16
PF03800	Nuf2 family	2	1	1	2	1	1	1	2	1	1	1	1	1	1		2	1	2	1
PF03801	HEC/Ndc80p family	1	1	1	3	1	1	1	2	2	2	3	2	1	2	2	1	1		2
PF03803	Scramblase	1	1	1	1	1	1	1	1	1		1	1	1	1	1	3	1	1	1
PF03807	NADP oxidoreductase coenzyme F420-dependent	2	2	2	2	3	2	2	2	3	1	2	3		3	1	2	3	4	3
PF03810	Importin-beta N-terminal domain	11	12	13	12	13	13	12	13	12	14	14	14	11	15	11	15	28	16	19
PF03813	Nrap protein domain 1	1	1	1	1	1	1	1	1	1	1	1	1	2	1	1	2	1	1	1
PF03819	MazG nucleotide pyrophosphohydrolase domain		1			1	1		1
PF03822	NAF domain	21	19	32	32	32	30	26	31	24	23	23	20	16	18	17	59	48	52	46
PF03828	Cid1 family poly A polymerase	2	1	4	4	4	4	4	4	3	4	4	4	4	4	4	4	5	5	6
PF03834	Binding domain of DNA repair protein Ercc1 (rad10/Swi10)	1		1	1	1	1	1	1	1	1	1	1	1	1	1	1	1	1	1
PF03835	Rad4 transglutaminase-like domain	2	1	1	1	1	1	1	1	1	1	1	1	1	1	1	1	4	1	1
PF03839	Translocation protein Sec62	1		1	1	1	1	1	1		1	1	1	1	1	1	2	1	1	1
PF03847	Transcription initiation factor TFIID subunit A	2	2	2	2	2	2	2	2	2	6		2	1	2		4	4	5	7
PF03849	Transcription factor Tfb2	2	3	5	5	4	3	4	4	2	1	1	1	1	1	1	1	5	1	5
PF03850	Transcription factor Tfb4	1	1	1	1	1	1	1	1	1	1	1	2	1	1	1	5	6	3	1
PF03853	YjeF-related protein N-terminus	1	1	1	1	1	1	1	1	1	1	1	1	1	1	1	1	1		4
PF03859	CG-1 domain	8	8	7	7	7	7	7	8	7	6	7	7	6	6	8	7	12	12	8
PF03868	Ribosomal protein L6, N-terminal domain		1											1						1
PF03870	RNA polymerase Rpb8	2	3	1	4	3	3	1	3	2	2	1	3	3	1	1	6	1	4	1
PF03871	RNA polymerase Rpb5, N-terminal domain	4	4	4	4	4	4	3	4	5	4	3	4	5	5	4	5	8	5	5
PF03874	RNA polymerase Rpb4	2	3	3	3	4	4	3	3	3	4	6	5	3	4	5	7	7	7	10
PF03876	SHS2 domain found in N terminus of Rpb7p/Rpc25p/MJ0397	2	2	4	5	5	5	4	5	4	4	2	3	2	3	3	5	3	4	3
PF03878	YIF1	2	2	2	2	2	2	1	2	2	2	2	2	3	2	2	4	2	4	3
PF03879	Cgr1 family			1	1	1	1	1	1	1		1	1		1		1	1	1	1
PF03881	Fructosamine kinase	2	2	1	1	1	1	1	1	1	1		2	1	1	1	1	1	1	1
PF03893	Lipase 3 N-terminal region	7	7	7	5	6	6	6	6	7	6	7	8	5	7	6	7	11	6	6
PF03896	Translocon-associated protein (TRAP), alpha subunit	1	1	1	1	1	1	1	1	1	1	1	1	1	1	1	1	1	1	1
PF03900	Porphobilinogen deaminase, C-terminal domain	2	2	1	2	2	1	1	1	1	1	1	1	2	1	1	3	1	2	1
PF03901	Alg9-like mannosyltransferase family	4	5	2	4	3	3	3	3	3	3	2	3	3	3	3	9	3	7	3
PF03908	Sec20	1	3	4	4	4	4	4	4	4	5	5	6	4	4	5	5	5	6	7
PF03909	BSD domain	7	9	11	11	11	11	10	11	10	12	9	9	7	9	13	11	15	11	11
PF03911	Sec61beta family	2	4	4	3	3	4	3	2	4	1	2	3		4	2	4	4	2	2
PF03912	Psb28 protein	1	1	2	1	3	2	2	2	1	1	1	1	1	1	1	1	1	1	1
PF03914	CBF/Mak21 family	3	3	3	3	3	3	3	3	3	2	3	3	3	3	3	5	7	3	3
PF03917	Eukaryotic glutathione synthase, ATP binding domain	3	4	5	3	3	2	3	5	2	2	2	2	3	2	2	5	4	3	5
PF03918	Cytochrome C biogenesis protein	1	1	2	2	2	2	2	2	2	1	1	2	2	2	1	1	1	1	8
PF03919	mRNA capping enzyme, C-terminal domain			1	1	1	1	1	1	1	1	1	3	2	1	1	2	1	2	1
PF03924	CHASE domain	4	4	4	4	4	4	4	4	6	3	4	5	3	4	4	9	6	5	7
PF03931	Skp1 family, tetramerisation domain	9	10	11	15	9	5	7	10	12	16	19	19	10	10	21	25	14	9	12
PF03936	Terpene synthase family, metal binding domain	43	37	44	56	46	36	26	28	27	39	36	45	28	28	31	55	37	70	38
PF03937	Flavinator of succinate dehydrogenase	1	1		1	1	1	1	1	2	2	3	1	1	2	2	1	1	1	2
PF03939	Ribosomal protein L23, N-terminal domain	3	3	3	3	3	3	3	3	3	4	3	4	2	3	4	5	4	4	3
PF03941	Inner centromere protein, ARK binding region	1		2	2	1	1	1	1		2	1	1			1	1	3	1	1
PF03942	DTW domain	1	1	3	2	3	3	3	3	2	2	3	3	2	2	3	7	3	6	2
PF03946	Ribosomal protein L11, N-terminal domain	1	3	5	6	6	6	5	5	6	6	5	5	3	6	4	5	7	7	7
PF03947	Ribosomal Proteins L2, C-terminal domain	3	3	4	4	7	3	3	4	3	4	3	4	3	4	2	1	7	8	9
PF03948	Ribosomal protein L9, C-terminal domain		1	2	2	2	2	2	2	2	2	2	2	2	2	2	2	4	3	5
PF03949	Malic enzyme, NAD binding domain	7	6	8	8	8	8	8	7	7	8	6	6	8	6	8	11	7	12	14
PF03950	tRNA synthetases class I (E and Q), anti-codon binding domain	4	6	4	4	4	4	4	4	5	5	5	5	3	5	5	5	6	6	6
PF03951	Glutamine synthetase, beta-Grasp domain	3	3	3	3	3	3	3	3	3	2	3	3	3	3	3	6	4	7	5
PF03952	Enolase, N-terminal domain	5	4	6	5	6	6	5	5	5	4	9	5	4	5	4	9	6	6	5
PF03953	Tubulin C-terminal domain	9	9	14	13	14	13	14	14	15	12	15	15	13	14	14	17	15	19	14
PF03959	Serine hydrolase (FSH1)	5	5	5	4	4	4	4	4	5	4	4	4	3	4	5	3	4	4	4
PF03962	Mnd1 HTH domain	1		1	1	1	1	1	1	1	1	1	1	1	1	1	1	1	1	2
PF03966	Trm112p-like protein	1	1	2	2	2	1	1	1	3	2	2	3	1	2	3	3	2	2	3
PF03969	AFG1-like ATPase	2	1	2	3	3	3	2	2	2	2	3	2	2	2	1	5	3	3	7
PF03980	Nnf1		1	1	1	1	1	1	1	1	1	1	1	1		1	2	1	1	1
PF03981	Ubiquinol-cytochrome C chaperone	1	1	1	1	2	2	2	1	1	1	1	1	1	1	1	1	1	2	1
PF03982	Diacylglycerol acyltransferase	4	4	5	5	5	5	5	5	3	5	6	7	5	5	6	9	8	13	11
PF03985	Paf1	1	1	1	1	1	1	1	1	1	1	1	1	1	1	1	1	2	2	1
PF03987	Autophagocytosis associated protein, active-site domain	2	2	2	3	4	4	2	4	2	2	2	2	2	2	2	5	4	4	3
PF03989	DNA gyrase C-terminal domain, beta-propeller	5	6	6	6	6	6	6	6	8	6	6	6	6				10	16	6
PF03997	VPS28 protein			2	3	2	2	2	2	1	1	1	1		1	1	1	2	1
PF03998	Utp11 protein	2	1	1	1	1	1	1	1	1	1	1	1		1	1	2	1	1	1
PF03999	Microtubule associated protein (MAP65/ASE1 family)	12	11	9	10	10	10	9	9	10	8	11	9	8	9	9	16	14	14	11
PF04000	Sas10/Utp3/C1D family	3	3	3	3	3	2	3	3	2	4	5	5	2	2	4	4	4	4	5
PF04003	Dip2/Utp12 Family	4	4	5	4	4	4	5	4	4	6	4	4	4	4	4	5	4	5	4
PF04004	Leo1-like protein	1	1	1	1	1	1	1	1	1	1	1	1	1	1	1	3	1	1	1
PF04005	Hus1-like protein	1	1	1	1	2	1	1	1	1	1	1	1	1	1	1	2	2	1	1
PF04006	Mpp10 protein	2	3	1	1	1	1	1	1	1	2	3	1	2	2	2	2	1	4	2
PF04012	PspA/IM30 family	1	2	1	1	1	1	1	1	1	1	1	1	1	1	1	1	1	1	1
PF04030	D-arabinono-1,4-lactone oxidase	9	12	8	12	9	9	11	12	10	9	5	7	5	15	9	10	10	7	10
PF04031	Las1-like	1	1	1	1	1	1		1	1		1	1	1	1	1	1	1	1	1
PF04032	RNAse P Rpr2/Rpp21/SNM1 subunit domain		1	2	1	2	3	2	1	1	1	1	2	1	1	1	1	1	1	1
PF04034	Ribosome biogenesis protein, C-terminal	1	1	1	1	1	1	1	1	1		1	1	1		1	2	3	1	2
PF04037	Domain of unknown function (DUF382)	3	3	1	1	1	1	1	1	2	2	2	3	1	2	2	2	1	2	2
PF04042	DNA polymerase alpha/epsilon subunit B	2	2	3	3	4	4	3	2	3	3	3	5	4	4	2	4	5	9	3
PF04043	Plant invertase/pectin methylesterase inhibitor	56	56	61	71	65	39	36	33	62	55	65	73	20	62	56	67	62	76	50
PF04045	Arp2/3 complex, 34 kD subunit p34-Arc	1	4	3	2	2	2	2	2	2	2	2	2	2	2	2	5	2	7	4
PF04046	PSP	3	3	3	3	2	2	3	3	3	3	3	4	2	3	3	2	5	3	4
PF04048	Exocyst complex component Sec8 N-terminal	1	1	1	1	1	1	1	1	1		1	1	1	1	1	2	1	1	2
PF04049	Anaphase promoting complex subunit 8 / Cdc23	1	2	1	1	1	1	1	1	1	1	2	1	1	1	1	3	2	3	1
PF04050	Up-frameshift suppressor 2	2	2	2	2	2	2	2	2	2	2	2	1	1	2	2	2	1	2	2
PF04051	Transport protein particle (TRAPP) component	3	3	4	6	3	3	3	5	3	2	3	3	2	3	2	8	3	8	3
PF04053	COPA/B second beta-propeller	4	4	5	5	5	4	5	5	5	6	6	6	5	6	6	9	9	9	8
PF04054	CCR4-Not complex component, Not1	1	1	3	2	2	1	2	3	2		1	2	1	2	2	3	4	6	3
PF04055	Radical SAM superfamily	9	11	13	15	17	17	13	14	13	12	13	14	10	13	13	20	16	19	16
PF04056	Ssl1-like	1	1	1	1	1	1	2	1	1	1	1	1	1	1	1	1	3	1	1
PF04057	Replication factor-A protein 1, N-terminal domain	8	7	10	10	10	9	8	10	7	18	13	13	8	8	17	4	7	10	8
PF04059	RNA recognition motif 2	8	7	8	8	8	7	8	7	8	9	10	9	5	9	9	16	8	13	12
PF04061	ORMDL family	3	3	3	3	3	3	3	3	3	3	3	3	3	3	3	6	3	4	5
PF04062	ARP2/3 complex ARPC3 (21 kDa) subunit	1	1	1	1	1	1	1	1	1	1	1	1	1	1	1	4	1	2	2
PF04063	Domain of unknown function (DUF383)	1	1	1	1	1	1	1	1	1	1	1	1	1	1	1	2	1	1	1
PF04064	Domain of unknown function (DUF384)	1	1	1	1	1	1	1	1	1	1	1	1	1	1	1	1	1	1	1
PF04065	Not1 N-terminal domain, CCR4-Not complex component	1	1	1	1	1	1	1	1	1	1	1	1	1	1	1	4	4	2	3
PF04068	Possible Fer4-like domain in RNase L inhibitor, RLI	4	3	3	3	3	3	3	3	3	1	3	4	3	2	2	4	5	3	4
PF04072	Leucine carboxyl methyltransferase	3	3	3	3	4	4	3	3	3	3	3	3	1	3	3	4	5	4	3
PF04073	Aminoacyl-tRNA editing domain	1	2	3	1	2	2	2	2	2	2	2	2	2	2	2	3	3	2	2
PF04078	Cell differentiation family, Rcd1-like	6	4	6	6	6	6	4	6	6	9	5	6	3	6	8	5	12	4	6
PF04080	Per1-like family			4	1	3	3	3	3	3	2	2	3	2	5	2	2	6	4	2
PF04081	DNA polymerase delta, subunit 4	2	2	2	3	2	2	2	2	3	3	3	3		2	3	5	2	3	3
PF04083	Partial alpha/beta-hydrolase lipase region	5	4	6	5	5	5	5	5	5	5	5	5	3	5	6	4	7	8	4
PF04084	Origin recognition complex subunit 2 RecA-like domain	1	1	1	1	1	4	1	1	1		1	1	2		1	2	3	2	1
PF04086	Signal recognition particle, alpha subunit, N-terminal	2	2	2	2	1	1	1	2	2	1		3	2	2	2	6	2	2	2
PF04091	Exocyst complex subunit Sec15 C-terminal			3	2	3	2	3	2	2	3	1	2	2	3	2	5	8	3	3
PF04095	Nicotinate phosphoribosyltransferase (NAPRTase) family			2	2	2	2	2	2	2	2	2	2	2	1		3	2	4	5
PF04096	Nup98-96 autopeptidase S59	3	3	4	3	4	4	4	4	1	3	5	4	3	2	2	5	5	3	5
PF04097	Nup93/Nic96	1	2	1	1	1	1	1	1	1	1	1	1	1	1	1	1	1	1	2
PF04099	Sybindin-like family	2	3	3	3	3	2	3	2	2	3	3	3	3	2	3	9	3	2	3
PF04100	Vps53, N-terminal	1	1	1	1	1	1	1	1	1	1	1	1	1	1	1		1	1	1
PF04101	Glycosyltransferase family 28 C-terminal domain	6	6	6	5	6	6	4	6	4	6	5	6	4	4	7	7	10	7	7
PF04104	Eukaryotic and archaeal DNA primase, large subunit	2	2	1	1	1	1	1	1	1	1	1	1	1	1	1	2	1	4	2
PF04106	Autophagy protein ATG5, UblB domain	1	1	1	1	1	1	1	1	1	1	1	1	1	1	1	1	1	2	1
PF04107	Glutamate-cysteine ligase family 2(GCS2)	2	2	2	4	2	2	2	2	5	3	2	5	1	4	2	4	2	1	4
PF04108	Autophagy protein ATG17-like domain	1		1	1	1	1	1	1	1	1	1	1	1	1	1	1	1	1	1
PF04109	Autophagy protein ATG9	5	4	2	1	2	2	2	2	2	3	2	2	1	2	3	2	2	3	2
PF04110	Ubiquitin-like autophagy protein Apg12			2		1	1	1	1	1	1	1	1		1	1	1	1	1	1
PF04111	Apg6 BARA domain	2	1	2	1	1	1	2	2	2	2	2	2	2	2	2	4	5	4	4
PF04112	Mak10 subunit, NatC N(alpha)-terminal acetyltransferase	1	1	2		1	1	1	1	1	1	1	1	1	1	1	2	2	1	1
PF04113	Gpi16 subunit, GPI transamidase component	1	2	1	1	1	1	1	1		1	1	1	1	1	1	1	2	1	1
PF04114	Gaa1-like, GPI transamidase component	1		1	1	1	1	1	1	1	1	1	1	1	1	1	1	2	3	1
PF04115	Ureidoglycolate lyase				1				1						1
PF04116	Fatty acid hydroxylase	24	27	33	30	28	26	31	31	27	27	29	31	22	28	28	30	29	42	26
PF04117	Mpv17 / PMP22 family	3	6	7	8	8	8	8	8	7	5	6	8	6	7	7	9	8	8	12
PF04121	Nuclear pore protein 84 / 107	2	2	1	1	1	1	1	1	2	1	1	1	1	1	1	2	1	1	1
PF04124	Dor1-like family	1	1	1	1	1	1	1	1	1	1	1	1	1	1	1	1	2	1	1
PF04127	DNA/pantothenate metabolism flavoprotein C-terminal domain	2	1	4	5	6	6	4	6	6	5	6	6	4	6	5	4	4	6	4
PF04129	Vps52/Sac2 family, coiled-coil	2	2	1	2	2	2	2	2	2	3	3	3	2	3	3	2	4	2	2
PF04130	Gamma tubulin complex component C-terminal	5	5	5	5	5	5	5	5	5	5	5	5	5	4	5	8	14	26	5
PF04133	Vacuolar protein sorting 55	2	3	3	1	2	2	2	2	2	2	1	2	2	2	2	2	2	2	4
PF04134	DCC1-like thiol-disulfide oxidoreductase	2	3	3	3	3	4	3	3	3	3	3	3	2	3	3	5	4	4	4
PF04135	Nucleolar RNA-binding protein, Nop10p family			1	2	1			2	1	1	1	1	1	1	2	2	1	2	3
PF04136	Conserved oligomeric Golgi complex subunit 3, N-terminal	2	2	1	1	1	1	1	1	1	1		1	2	1	1	1	1	1	1
PF04137	Endoplasmic Reticulum Oxidoreductin 1 (ERO1)	1	1	1	1	1	1	1	1	1	1	1	1	1	2		2	1	6	1
PF04139	Rad9	1	1	1	1	2	2	1	1	1	1	1	1		1	1	1	6	1	1
PF04140	Isoprenylcysteine carboxyl methyltransferase (ICMT) family	1		1	1	1	1	1	1	1	1	1	1	2	1	1	2	1	1	1
PF04142	Nucleotide-sugar transporter	6	8	8	7	8	8	7	9	7	7	7	8	6	8	7	11	18	15	13
PF04144	SCAMP family	5	8	9	9	8	8	8	7	8	11	10	8	6	8	9	11	10	10	9
PF04145	Ctr copper transporter family	4	5	5	7	7	4	4	4	5	7	6	9		5	8	10	8	6	6
PF04146	YT521-B-like domain	10	11	12	13	12	12	12	13	11	13	11	12	10	14	11	25	29	23	19
PF04147	Nop14-like family	3	3	1	1	1	1	1	1	1	1	1	1	1	1	1	2	3	1	1
PF04152	Mre11 DNA-binding presumed domain	2	2	2	3	2	2	2	2	2	2	2	2	1	2	2	2	2	3	3
PF04153	NOT2/NOT3/NOT5 C-terminal	2	2	4	2	3	3	3	3	3	3	3	2	3	3	2	10	8	6	5
PF04157	EAP30/Vps36 family	2	1	3	3	3	3	3	3	2	2	2	3	2	2	2	5	3	4	3
PF04158	Sof1-like domain	1	1	2	2	2	2	2	2	1		1	1	1	1	1	1	1	2	1
PF04161	Arv1-like family	2		1	1	1	1	1	1	1	1	1	1	1	1	1	1	14	1	3
PF04172	LrgB-like family	1	1	1	1	1	1	1	1	1	1	1	1	1	1	1	2	1	3	1
PF04176	TIP41-like family	2	1	1	1	1	1	1	1		1	1	1	1	1	1	1	1	1	1
PF04177	TAP42-like family	2	2	2	3	2	2	2	2	2	4	4	2	2	3	3	4	2	5	2
PF04178	Got1/Sft2-like family	4	6	8	7	7	8	8	6	7	5	6	8	7	7	5	10	8	7	9
PF04179	Rit1 DUSP-like domain			1	1	1	1	1	1	1	1	1	1	1	1	1	1	2	6	1
PF04181	Rtr1/RPAP2 family	1	1	1	1	1	1	1	1	1	1	1	1	1	1	1	1	3	2	2
PF04182	B-block binding subunit of TFIIIC		1	1	1	1	1	1	1		2	1	2	1	1	1	6	1	2	1
PF04185	Phosphoesterase family	5	5	5	5	5	4	5	5	4	5	9	7	5	3	3	5	5	5	6
PF04187	Haem-binding uptake, Tiki superfamily, ChaN	2	2	2	2	2	2	2	2	2	3	1	2	2	2	2	2	2	2	2
PF04188	Mannosyltransferase (PIG-V)	2	1	1	1	1	1	1	1	2	1	1	1	1	1	2	1	1	1	1
PF04189	Gcd10p family	1	1	1	1	1	1	1	1	1	1	1	1	1	1	1	2	1	1	1
PF04190	Golgi to ER traffic protein 4	1	1	1	1	2	2	1	1	1	1	1	1	1	1	1	1	1	1	1
PF04191	Phospholipid methyltransferase	1	1	1	1	1	1	1	1	1	2	1	1	1	1	2	1	1	1	1
PF04192	Utp21 specific WD40 associated putative domain	2	2	1	1	1	1	1	1	1	1	1	1	1	1	1	1	1	1	1
PF04193	PQ loop repeat	5	5	6	6	6	6	5	6	4	6	5	5	6	6	6	17	6	8	25
PF04194	Programmed cell death protein 2, C-terminal putative domain	3	2	2	3	2	2	2	3	3	3	2	3	2	3	2	5	2	4	2
PF04195	Putative gypsy type transposon	9	7	10	26	16	8	6	4	26	17	25	12	1	38	29	379	6	19	12
PF04199	Putative cyclase	3	3	3	3	3	3	3	3	3	3	3	3	1	4	3	6	5	3	7
PF04209	Homogentisate 1,2-dioxygenase C-terminal			1	1	1	1	1	1	1	1	1	1	1	1	1	2	2	1	1
PF04212	MIT (microtubule interacting and transport) domain	1	1	1	1	1	1	1	1	1	1	1	1	1	1	1	5	1	1	1
PF04227	Indigoidine synthase A like protein	1	2	1	2	1	1	1	1	1	2	2		1	4	1	3	1	1	3
PF04231	Endonuclease I			1	1	1	1	1	1	1	1	1	1	1	1	1	1	1		1
PF04241	Protein of unknown function (DUF423)	1	1	1	1	1	1	1			1	1	1		1	1	1	1	1	1
PF04253	Transferrin receptor-like dimerisation domain	2	4	4	5	4	4	5	4	4	4	4	4	2	4	4	6	5	4	5
PF04258	Signal peptide peptidase	10	8	7	7	8	7	7	9	7	9	7	7	5	7	7	13	8	23	12
PF04263	Thiamin pyrophosphokinase, catalytic domain	2	3	3	3	3	3	3	3	2	2	3	2	1	3	2	3	5	5	4
PF04265	Thiamin pyrophosphokinase, vitamin B1 binding domain	2	2	3	3	3	3	3	3	2	2	3	2	1	3	2	3	5	5	4
PF04266	ASCH domain	1	2	2	2	2	2	2	2	2	2	4	2	2	3	1	2	4	10	3
PF04278	Tic22-like family	3	2	3	3	3	3	3	3	3	3	3	4	3	4	2	4	4	4	2
PF04280	Tim44-like domain	2	3	3	3	3	3	3	3	3	3	3	3	2	2	2	3	2	2	2
PF04281	Mitochondrial import receptor subunit Tom22	2	2	1	2	4	2	2	1	1	1	1			1		3	1	2	1
PF04305	Protein of unknown function (DUF455)	3	3	3	3	3	3	3	3	3	3	2	3	2	3	2	2	3	2	3
PF04321	RmlD substrate binding domain	2	1	4	2	5	5	4	4	4	4	5	5	3	4	4	8	5	6	5
PF04339	Peptidogalycan biosysnthesis/recognition	1	1	1	1	1	2	1	1	1	1	1	1		1	1	2	2	1	3
PF04357	TamB, inner membrane protein subunit of TAM complex	1	1	1	1	1	1	1	1	1	1	1	1	1	1		1	1	4	1
PF04359	Protein of unknown function (DUF493)	2	2	2	2	2	2	2	2	2	2	2	2	2	2	2	3	1	5	4
PF04366	Las17-binding protein actin regulator	4	4	4	4	4	4	4	3	4	7	4	4	4	4	4	4	7	6	4
PF04367	Protein of unknown function (DUF502)	2	3	5	5	6	6	4	5	3	5	5	5	4	5	4	11	9	5	9
PF04371	Porphyromonas-type peptidyl-arginine deiminase	1	1	1	1	1	1	1	1	2	1	1	1	3	1	1	1	1	1	1
PF04376	Arginine-tRNA-protein transferase, N terminus			1	1	1	1	1	1	1	1	1	1	1	1	1	1	2	2	1
PF04377	Arginine-tRNA-protein transferase, C terminus			1	1	1	1	1	1	1	1	2	1	1	1	1	1	2	5	1
PF04379	ApaG domain	3	2	2	3	2	2	3	3	2	2	2	3	2	1	3	6	2	2	3
PF04387	Protein tyrosine phosphatase-like protein, PTPLA	2	1	4	4	4	2	4	3	3	3	3	3	4	2	3	10	4	8	3
PF04389	Peptidase family M28	6	5	6	6	6	6	5	7	6	6	6	6	5	7	5	10	9	6	7
PF04398	Protein of unknown function, DUF538	31	26	40	42	40	19	21	23	32	34	32	39	6	34	39	42	30	56	53
PF04406	Type IIB DNA topoisomerase	1	1	3	4	3	4	2	5	2	4	3	3	3	3	3	4	4	6	3
PF04408	Helicase associated domain (HA2), winged-helix	13	14	16	15	17	17	13	16	12	18	11	13	14	14	16	16	30	20	20
PF04410	Gar1/Naf1 RNA binding region	2	2	2	2	2	2	4	2	2	2	2	2	2	2	2	2	2	2	3
PF04413	3-Deoxy-D-manno-octulosonic-acid transferase (kdotransferase)	1	1	1	1	1	1	2	1	1	2		1	1	1		2	1	1	1
PF04414	D-aminoacyl-tRNA deacylase	1	1	2	1	2	3	2	1	1	1	1	1	1	1	1	3	1	1	3
PF04418	Domain of unknown function (DUF543)	1	1	1	1	1	1	1	1	2	1	1	1	1		1	1	2	1	1
PF04419	Small EDRK-rich factor 1/2-like, N-terminal	4	4	3	3	2	2	2	1	3	2	2	2		2	3	3	4	4	2
PF04420	CHD5-like protein	2	1	3	2	2	2	2	3		1	1	2	1	1	1	1	2	3	2
PF04422	Coenzyme F420 hydrogenase/dehydrogenase, beta subunit N-term	1	1	1	2	1	1	1	1	1	1	1	1	1	1	1	1	1	4	2
PF04424	MINDY deubiquitinase	1	2	4	6	5	8	4	4	3	5	6	1	4	2	5	6	6	1	17
PF04427	Brix domain	7	8	7	7	6	6	7	7	8	7	8	7	10	8	7	8	9	7	7
PF04428	Choline kinase N terminus																2
PF04430	Protein of unknown function (DUF498/DUF598)	1	1	2	1	1	1	2	1	1	1	1	1	1	1	1	2	1	1	2
PF04431	Pectate lyase, N terminus	3	3	3	3	3	2	1	1	2	4	1	2	2	3	4	5	4	4	4
PF04432	Coenzyme F420 hydrogenase/dehydrogenase, beta subunit C terminus	1	1	1	1	1	1	1	1	1	1	1	1	1	1	1	1	2	4	2
PF04433	SWIRM domain	8	8	10	10	10	10	8	10	9	9	9	11	9	9	10	11	11	15	12
PF04434	SWIM zinc finger	4	3	55	68	62	63	50	70	68	52	77	113	30	80	53	63	53	75	60
PF04437	RINT-1/TIP-1 family	1	1	2	2	2	2	2	2	2	2	2	2	2	2	3	5	4	2	3
PF04438	HIT zinc finger	3	5	7	7	7	6	7	6	4	5	5	5	8	3	4	8	11	12	8
PF04442	Cytochrome c oxidase assembly protein CtaG/Cox11	1	1	1	1	1	1	1	1	1	1	1	1	1	1	1	2	1	1	1
PF04446	tRNAHis guanylyltransferase	2		3	2	2	2	3	2	5	4	4	4	2	4	4	3	3	3	2
PF04450	Peptidase of plants and bacteria	6	9	6	7	6	5	5	4		6	8	7	1	4	7	4	2	5	6
PF04452	RNA methyltransferase domain	1	1	1	1	1	1	1	1	1	1	1	1	1	1	1	1	1	4	1
PF04455	LOR/SDH bifunctional enzyme conserved region	1	1	3		1	1	1	1	1	1	1	1	1	1	1	3	1	2	5
PF04481	Protein of unknown function (DUF561)	1	1	1	1	1	1	2	1	2	2	2	2	1	2	2	1	1	1	3
PF04483	Protein of unknown function (DUF565)	2	2	4	5	4	4	5	6	2	2	3	2	3		3	3	6	8	8
PF04484	QWRF family	9	9	12	10	10	10	12	11	18	12	9	15	8	21	13	15	19	21	10
PF04488	Glycosyltransferase sugar-binding region containing DXD motif			2	2	2	2	2	1	2	2	2	2		2	2	2	2	2	1
PF04493	Endonuclease V	1	1	1	1	1	1	1	1	1	1	1	1		1	1	1	1	7	1
PF04494	WD40 associated region in TFIID subunit, NTD2 domain	1	1	1	1	1	1	1	1	1	1	1	2	1	1	1	3	2	4	1
PF04499	SIT4 phosphatase-associated protein	6	7	6	6	6	6	6	6	2	6	8	6	7	6	6	12	14	10	6
PF04502	Saf4/Yju2 protein	3	3	4	3	2	2	3	3	4	4	4	4	2	5	3	4	2	4	3
PF04504	Glabrous-enhancer-binding protein-like family, DBD domain	11	13	14	16	19	18	11	14	11	19	20	17	6	12	20	18	15	21	17
PF04506	Rft protein	1	2	1	2	1	2	1	2	1	1	1	1	2	1	2	1	1	1	3
PF04511	Der1-like family	2	2	2	2	2	2	2	2	2	2	2	2	2	2	1	4	2	3	3
PF04515	Plasma-membrane choline transporter	4	4	5	5	5	5	5	5	5	5	5	5	5	5	5	7	7	8	5
PF04520	Senescence regulator	4	4	15	14	15	11	9	7	19	16	15	19	1	17	15	20	16	27	10
PF04525	LURP-one-related	31	30	33	38	37	29	26	32	29	35	36	39	11	31	32	24	33	36	39
PF04526	Protein of unknown function (DUF568)	7	9	13	9	14	9	10	9	8	6	9	10	3	9	12	7	9	10	11
PF04535	Casparian strip membrane protein domain	36	41	43	53	48	42	40	47	37	42	42	45	31	43	40	43	48	46	36
PF04536	TPM domain	1	1	1	1	1	1	1	1	1	2	1	1	1	1	2	1	1	1	2
PF04539	Sigma-70 region 3	7	7	8	9	9	9	8	7	4	9	10	7	4	8	7	9	9	8	9
PF04542	Sigma-70 region 2	5	5	6	7	6	6	6	6	4	6	8	6	4	6	5	10	7	7	7
PF04545	Sigma-70, region 4	6	5	6	6	6	5	6	6	3	8	10	7	4	6	7	8	7	6	7
PF04547	Calcium-activated chloride channel	1	1	1	1	1	1	1	1	1	1	1	1	1	1	1	1	1	1	2
PF04548	AIG1 family	7	9	7	8	7	10	8	8	7	7	6	9	5	5	7	11	10	10	11
PF04551	GcpE protein	2	2	2	2	3	3	1	4	2	2	2	2	2	2	2	2	2	2	2
PF04557	Glutaminyl-tRNA synthetase, non-specific RNA binding region part 2	2	2	2	2	2	2	2	2	2	2	2	2	1	2	2	2	3	2	3
PF04558	Glutaminyl-tRNA synthetase, non-specific RNA binding region part 1	2	2	2	2	2	2	2	2	2	2	2	2	1	2	2	2	3	2	3
PF04560	RNA polymerase Rpb2, domain 7	7	8	6	7	7	7	6	6	6	6	12	5	7	5	6	8	13	10	5
PF04561	RNA polymerase Rpb2, domain 2	5	2	6	8	10	6	5	6	6	5	10	6	9	7	6	6	12	9	6
PF04563	RNA polymerase beta subunit	9	7	5	7	7	7	6	6	6	5	14	15	9	6	6	3	8	8	5
PF04564	U-box domain	44	40	71	69	70	58	62	64	63	68	62	72	34	66	72	89	99	107	75
PF04565	RNA polymerase Rpb2, domain 3	5	3	5	7	7	9	6	6	5	6	9	6	8	6	6	5	13	9	6
PF04566	RNA polymerase Rpb2, domain 4	1	3	4	6	6	6	5	4	4	4	11	5	5	5	6	3	10	8	5
PF04567	RNA polymerase Rpb2, domain 5	5	4	4	6	6	6	4	5	5	4	10	4	5	5	6	3	10	8	5
PF04568	Mitochondrial ATPase inhibitor, IATP	2	2	1		1	3	1		2	2	2	1		2	2		1	2	1
PF04569	Protein of unknown function																1
PF04570	zinc-finger of the FCS-type, C2-C2	30	30	28	31	32	25	27	23	30	28	33	29	17	31	30	33	37	41	29
PF04571	lipin, N-terminal conserved region	3	3	3	3	3	3	3	3	2	3	2	3	2	2	3	4	4	2	2
PF04572	Alpha 1,4-glycosyltransferase conserved region			2	2	2	2	2	1	2	2	2	2		2	2	2	2	2	1
PF04573	Signal peptidase subunit	2	2	2	4	3	3	4	3	2	2	2	2	2	2	2	2	3	2	2
PF04576	Zein-binding	11	11	14	14	16	16	14	12	16	15	12	15	12	12	12	17	21	29	21
PF04577	Glycosyltransferase 61	32	31	38	38	34	28	26	28	38	35	39	39	21	38	37	39	47	32	43
PF04578	Protein of unknown function, DUF594	60	65	66	71	86	59	48	67	43	41	50	89	16	38	36	109	70	83	107
PF04588	Hypoxia induced protein conserved region	3	3	3	3	3	3	3	3	5	3	7	5	5	5	3	6	5	4	5
PF04597	Ribophorin I	3	4	2	2	3	6	2	2	2	2	2	2	3	2	2	2	2	3	2
PF04601	Beta-trefoil domain of unknown function (DUF569)	17	18	11	14	13	14	6	10	10	14	15	13	6	8	14	14	12	26	6
PF04603	Ran-interacting Mog1 protein	1	1	1	1	1	1	1	1	2	2	1	1	1	1	2	2	1	3	1
PF04607	Region found in RelA / SpoT proteins	5	5	6	6	6	6	6	6	6	5	6	6	6	6	5	9	7	10	9
PF04614	Pex19 protein family	1	1	1	1	1	1	1	1	1	1	1	1		1	1	1	2	1	2
PF04615	Utp14 protein	1	3	1	1	1	1	1	1	1	1	1	1	1	1	1	1	1	2	2
PF04616	Glycosyl hydrolases family 43	1	1	2	2	2	2	1	2	2	1	2	2	2	2	1	3	4	5	2
PF04618	HD-ZIP protein N terminus	1	1	1	1	1	1	1	1	1	2	1	1	1	1	1	1	1	1	1
PF04622	ERG2 and Sigma1 receptor like protein	1	1	1	1	1	1	1	1		1		1		1	1		1	1	1
PF04627	Mitochondrial ATP synthase epsilon chain			2	2	1	1	1	2	2	2	1	2	1	1	1	1	2	1	4
PF04628	Sedlin, N-terminal conserved region	3	4	4	4	3	3	3	3	3	4	4	6	2	3	4	6	9	4	7
PF04640	PLATZ transcription factor	15	14	12	15	17	17	14	17	19	19	25	20	11	18	20	21	19	23	22
PF04641	Rtf2 RING-finger	2	1	2	2	2	2	2	2	2	2	2	2	1	2	2	2	2	3	2
PF04646	Protein of unknown function, DUF604	8	8	8	8	7	6	6	7	7	12	8	9	6	7	10	14	17	11	10
PF04652	Vta1 like	7	7	8	5	8	8	8	7	8	9	5	8	8	6	8	7	11	8	8
PF04654	Protein of unknown function, DUF599	8	6	6	7	7	7	4	7	9	9	7	9	7	11	8	8	9	7	7
PF04658	TAFII55 protein conserved region	1	1	1	1	1	1	1	1	1	1	1	1		1	1	4	1	6	1
PF04667	cAMP-regulated phosphoprotein/endosulfine conserved region	5	5	5	6	6	5	6	5	6	6	6	6	5	7	5	12	8	5	15
PF04674	Phosphate-induced protein 1 conserved region	12	10	14	10	14	9	11	9	13	14	12	12	3	11	12	15	13	12	12
PF04675	DNA ligase N terminus	4	4	3	4	3	3	4	4	3	2	3	3	3	4	3	3	5	8	3
PF04676	Protein similar to CwfJ C-terminus 2	3	2	3	3	2	2	3	2	1	2	3	3	2	3	2	3	2	2	2
PF04677	Protein similar to CwfJ C-terminus 1	3	2	3	2	2	2	4	2	1	2	2	4	2	4	2	3	3	2	2
PF04678	Mitochondrial calcium uniporter	5	6	5	5	4	5	5	5	4	4	5	5	2	5	5	5	5	5	4
PF04679	ATP dependent DNA ligase C terminal region	3	3	3	3	3	3	3	3	2	2	3	3	3	3	3	2	6	4	3
PF04683	Proteasome complex subunit Rpn13, Pru domain	1	1	1	1	1	1	1	1		1	2	1	1	1	1	2	2	1
PF04685	Glycosyl-hydrolase family 116, catalytic region	4	4	4	4	4	4	5	4	4	4	4	4	3	4	4	6	7	8	8
PF04689	DNA binding protein S1FA			1	1	1	1	1	1	1	1	2	1		1	1	2	1	1	1
PF04690	YABBY protein, C-terminal	7	8	9	8	8	7	8	9	8	8	11	10	8	10	6	16	12	14	10
PF04695	Pex14 N-terminal domain	2	1	3	3	3	3	3	3	2	3	4	3	3	3	3	7	6	5	6
PF04696	pinin/SDK/memA/ protein conserved region	1	1	1	1	1	1	1	1	1	1	1	1	1	1	1	2	1	4	1
PF04699	ARP2/3 complex 16 kDa subunit (p16-Arc)	1	1	2	2	2	2	1	1	2	2	2	2	1	1	3	2	2	1	2
PF04707	PRELI-like family			2	2	2	1	2	1	1	1	1	2	1	1	2	2	2	2	2
PF04715	Anthranilate synthase component I, N terminal region	3	3	3	3	3	3	3	3	3	3	3	4	3	2	2	6	4	9	3
PF04716	ETC complex I subunit conserved region	1	1	1	1	1	1	1	1	1	1	1	1	1	1	1	1	1	1	1
PF04718	Mitochondrial ATP synthase g subunit	3	3	3	3	3	3	3	3	3	3	3	2	2	3	3	5	5	4	3
PF04719	hTAFII28-like protein conserved region			1	1	1	1	1	1	1	1	1	1	1	1	1	1	1	1	1
PF04720	PDDEXK-like family of unknown function	9	8	10	10	10	11	11	10	9	12	13	12	5	8	10	13	10	11	10
PF04722	Ssu72-like protein	1	1	1	1	1	1	1	1	2	1	1	1	1	1	1	3	1	1	1
PF04724	Glycosyltransferase family 17	1	2	3	3	3	3	3	3	2	2	3	2	4	2	2	8	5	8	3
PF04725	Photosystem II 10 kDa polypeptide PsbR	2	1	2	2	3	2	1	2	2	2	2	3	1	2	2	6	1	2	6
PF04727	ELMO/CED-12 family	3	7	8	7	7	7	7	7	7	8	8	8	4	7	8	10	18	11	13
PF04729	ASF1 like histone chaperone	1	1	1	1	1	1	1	1	1	1	1	1	1	1	1	2	1	1	1
PF04733	Coatomer epsilon subunit	3	3	2	2	2	2	2	2	2	2	2	2	1	2	2	3	2	2	3
PF04734	Neutral/alkaline non-lysosomal ceramidase, N-terminal	2	2	2	2	2	2	1	1	1	2	2	3	1	2	2	2	2	4	2
PF04739	5'-AMP-activated protein kinase beta subunit, interaction domain	4	3	4	4	4	5	4	4	3	4	5	4	4	4	4	5	4	6	3
PF04749	PLAC8 family	13	16	22	20	19	16	17	17	21	15	10	19	7	16	15	31	21	26	25
PF04751	Dual-action ribosomal maturation protein DarP	1	1	1	1	1	1	1	1	1	1	1	1		1	1	2	6	1	2
PF04752	ChaC-like protein	2	3	2	2	2	2	2	2	4	2	2	3	1	4	2	9	2	2	5
PF04755	PAP_fibrillin	8	12	11	10	10	10	11	12	12	10	10	11	8	12	13	12	16	14	12
PF04756	OST3 / OST6 family, transporter family		1	2	2	2	1	2	1	2	1	2	1	2	1	2	2	2	2	5
PF04757	Pex2 / Pex12 amino terminal region	2	2	4	3	3	3	3	3	3	2	3	3	2	3	3	5	6	6	4
PF04758	Ribosomal protein S30	2	2	1	2	3	1		2	2	2	1	2		2	3	3	3	2	3
PF04759	Protein of unknown function, DUF617	7	7	12	11	13	10	6	9	11	12	16	15	2	10	12	13	13	12	15
PF04760	Translation initiation factor IF-2, N-terminal region	1	1	1	1	1	1	1	1	1	1	1	1	1	1	1	2	1	1	1
PF04762	ELP1 first N-terminal beta-propeller	3	3	2	2	2	2	2	1	1	1	2	2	2	1	1	1	2	4	2
PF04765	TOD1/MUCI70, glycosyltransferase-like domain	7	10	8	9	9	8	8	8	8	8	7	8	7	7	9	10	13	11	10
PF04770	ZF-HD protein dimerisation region	7	8	14	11	13	12	8	10	12	7	10	10		11	7	14	17	21	8
PF04774	Hyaluronan / mRNA binding family	3	3	3	3	4	3	3	3	3	4	5	4	3	4	4	4	5	4	4
PF04777	Erv1 / Alr family	2	2	2	2	2	2	2	2	2	2	1	2	2	2	2	4	4	3	3
PF04780	Protein of unknown function (DUF629)	3	2	3	4	4	6	3	3	21	4	5	3	2	15	3	17	4	5	4
PF04781	Protein of unknown function (DUF627)	1	1		1	1	1			1	1	1	1	1	1	1	1	2		1
PF04782	Protein of unknown function (DUF632)	19	20	19	24	22	20	17	23	17	21	19	21	14	18	19	25	20	28	20
PF04783	Protein of unknown function (DUF630)	15	16	18	19	19	19	17	18	15	18	19	20	14	16	17	23	18	25	19
PF04784	Protein of unknown function, DUF547	14	15	15	16	15	15	16	15	15	13	28	16	15	19	16	26	31	39	20
PF04788	Protein of unknown function (DUF620)	6	7	9	8	8	9	8	7	8	8	9	12	8	8	8	11	8	10	8
PF04791	LMBR1-like membrane protein	4	2	5	3	4	4	4	3	4	4	4	7	3	4	4	8	6	7	6
PF04795	PAPA-1-like conserved region	2	2	2	2	2	2	2	2	2	2	2	2	2	1	1	4	6	2	2
PF04800	NADH dehydrogenase ubiquinone Fe-S protein 4			1	1	1	1	1	1	1	1	1	1	1	1	1	1	1	1	2
PF04801	RPC5 protein	2	2	2	1	2	2	2	1	2	3	1	2	3	1	2	2	3	6	2
PF04802	Phosphatase 4 regulatory subunit 3	2	2	2	1	2	2	2	1	3	1	1	1	3	3	1	4	1	6	2
PF04810	Sec23/Sec24 zinc finger	7	5	8	8	8	7	8	7	7	7	8	8	8	9	7	12	8	10	14
PF04811	Sec23/Sec24 trunk domain	9	9	10	10	10	9	10	9	9	10	11	10	10	11	9	14	10	15	16
PF04815	Sec23/Sec24 helical domain	3	2	10	10	10	9	10	9	9	9	11	10	9	11	8	13	10	13	15
PF04818	CID domain	7	5	12	11	11	11	11	13	9	8	10	9	9	9	8	13	15	13	14
PF04819	Family of unknown function (DUF716)	7	7	9	9	10	4	7	6	12	10	11	10		11	9	9	9	17	11
PF04821	Timeless protein	1	1	1	1	1	1	1	1	1	1	1	1	1	1	1	1	3	10	1
PF04824	Conserved region of Rad21 / Rec8 like protein	5	5	5	4	5	5	5	4	4	4	3	4	4	4	3	5	9	9	4
PF04825	N terminus of Rad21 / Rec8 like protein	3	4	6	5	7	9	6	6	4	4	4	4	3	4	4	7	9	7	5
PF04826	Armadillo-like									1		1				1				2
PF04827	Plant transposon protein			23	20	34	16	17	14	27	11	25	7	3	28	14
PF04828	Glutathione-dependent formaldehyde-activating enzyme			1	1	1	1	1		2	2	2	1	2	1	1	2	2	4	2
PF04832	SOUL heme-binding protein	6	4	7	6	7	7	6	6	7	12	5	7	3	7	4	8	7	7	9
PF04833	COBRA-like protein	8	8	10	9	9	8	9	6	7	10	16	11	6	8	10	14	13	11	9
PF04839	Plastid and cyanobacterial ribosomal protein (PSRP-3 / Ycf65)	1	1	1	1	1	1	1	1	1	1	1	1		1	1	1	1	1	1
PF04840	Vps16, C-terminal region	1	1	1	1	1	1	1	1	1	1	1	1	2	1	1	1	1	1	1
PF04841	Vps16, N-terminal region	2	2	1	1	1	1	1	1	1	1	1	1	1	1	1	1	1	1	1
PF04842	Plant protein of unknown function (DUF639)	4	4	5	6	5	6	5	6	5	6	6	6	3	4	3	9	7	8	5
PF04844	Transcriptional repressor, ovate	14	12	29	31	30	14	20	17	30	29	29	31		29	23	31	32	37	27
PF04845	PurA ssDNA and RNA-binding protein	2	1	2	2	2	2	2	2	2	2	2	2	2	2	2	2	2	2	2
PF04851	Type III restriction enzyme, res subunit	4	2	2	6	3	3	2	5	4	3	3	3	3	2	4	5	5	5	7
PF04852	ALOG domain	4	4	11	7	11	7	9	9	7	8	8	8	2	7	9	17	11	18	9
PF04855	SNF5 / SMARCB1 / INI1	1	2	2	2	2	2	2	2	2	2	2	2	2	2	2	1	2	3	4
PF04857	CAF1 family ribonuclease	6	6	13	7	11	8	6	7	14	8	10	17	4	17	6	17	23	18	13
PF04859	Plant protein of unknown function (DUF641)	6	6	8	9	10	6	7	5	5	5	4	6	3	4	4	11	14	9	7
PF04862	Protein of unknown function (DUF642)	18	18	20	21	20	19	20	21	20	23	24	20	21	18	19	27	30	22	23
PF04863	Alliinase EGF-like domain	2	3	2	3	1	1	1	3	2	1	3	4	4	2	1	2	1	1	4
PF04864	Allinase	5	6	6	6	5	5	4	8	6	8	10	8	8	5	5	4	4	5	8
PF04869	Uso1 / p115 like vesicle tethering protein, head region			1	1	1	1	1	1	1	1	1	1	1	2		1	2	1	1
PF04871	Uso1 / p115 like vesicle tethering protein, C terminal region	1	1	1	1	1	1	1	1	1	2	1	1	1	2	1	1	2	1	1
PF04873	Ethylene insensitive 3, DNA-binding domain		2	6	6	7	6	7	5	4	6	7	6	2	5	7	11	13	15	9
PF04874	Mak16 protein C-terminal region	1	1	2	2	3	4	2	2		2	2	1	1	1	1	5	2	1	2
PF04882	Peroxin-3		2	2	2		2	2	2	2	2	2	2	1	2	2	4	3	2	2
PF04884	Vitamin B6 photo-protection and homoeostasis domain	6	5	6	7	7	6	6	6	5	5	6	6	6	4	5	8	18	8	8
PF04885	Stigma-specific STIG1-like protein family	5	5	3	4	5	2	2	1	5	7	9	7		5	7	3	5	5	4
PF04889	Cwf15/Cwc15 cell cycle control protein	1	1	1	1	1	1	1	1	1	1	1	1	1	1	1	1	2	3	3
PF04893	Yip1 domain	3	3	5	5	5	5	5	5	5	5	5	5	3	5	4	9	7	5	7
PF04898	Glutamate synthase central domain	2	3	3	3	3	2	3	3	3	3	2	3	3	2	3	3	4	3	4
PF04900	Fcf1	2	2	2	1	2	2	2	2	2	2	2	2	2	2	2	3	4	2	4
PF04909	Amidohydrolase	3	3	3	4	3	3	3	5	3	3	4	2	2	3	3	3	2	2	2
PF04910	Transcriptional repressor TCF25			1	1	1	1	1	1	1		1	1	1	1		1	1	2	1
PF04921	XAP5, circadian clock regulator C-terminal domain		1	2	1	2	2	2	1	1	1	1	3	1	1	1	2	1	2	1
[truncated: 2,566 more rows]

## Sheet: Data2
Supplementary Data 2. Details of environment factors from WorldClim database used for association analysis in this study
Year	ID	Province	Lon	Lat	Alt	Annual Mean Temperature	Mean Diurnal Range (Mean of monthly (max temp - min temp))	Isothermality (BIO2/BIO7) (×100)	Temperature Seasonality (standard deviation ×100)	Max Temperature of Warmest Month	Min Temperature of Coldest Month	Temperature Annual Range (BIO5-BIO6)	Mean Temperature of Wettest Quarter	Mean Temperature of Driest Quarter	Mean Temperature of Warmest Quarter	Mean Temperature of Coldest Quarter	Annual Precipitation	Precipitation of Wettest Month	Precipitation of Driest Month	Precipitation Seasonality (Coefficient of Variation)	Precipitation of Wettest Quarter	Precipitation of Driest Quarter	Precipitation of Warmest Quarter	Precipitation of Coldest Quarter
2023	23-1-3_1	SD	116.195	35.8661	38	13.5871	9.94354	26.9672	1030.45	30.8835	-5.98925	36.8727	25.823	0.3055	25.823	0.3055	633	190	7	106.182	398	24	398	24
2023	23-2-28_1	HillX	113.245	39.1943	934	5.86527	13.7639	31.8409	1098.56	25.7405	-17.4865	43.227	18.7531	-8.34958	18.7531	-8.34958	441	121	3	106.009	283	13	283	13
2023	23-1-59_1	HillX	111.64	35.4776	862	11.2065	10.9341	29.9693	957.043	28.3748	-8.1095	36.4842	21.2084	-1.11633	22.6145	-1.11633	565	128	5	85.356	320	17	294	17
2013	13-38_1	HN	113.633	33.0024	106	14.607	9.75733	28.8097	912.901	30.51	-3.35825	33.8683	25.58	2.90121	25.58	2.90121	892	184	14	68.5032	423	57	423	57
2023	23-3-36_1	SD	119.874	36.9067	67	12.1467	9.33221	26.3274	997.613	28.7043	-6.7425	35.4468	23.8543	-0.708792	23.8543	-0.708792	680	189	9	102.023	421	28	421	28
2023	W-148_1	SC	105.486	30.7351	374	17.0838	6.81473	24.7892	745.771	30.916	3.42525	27.4907	25.2298	7.48996	25.9603	7.48996	1024	226	11	88.4764	577	35	558	35
2023	23-1-15_1	AH	116.325	33.5857	34	15.0801	10.2816	28.7667	978.542	31.7832	-3.958	35.7412	26.8354	2.60454	26.8354	2.60454	769	199	16	83.1965	417	53	417	53
2023	23-1-36_1	HN	113.19	33.6595	97	15.0223	10.4105	29.2683	947.927	31.8132	-3.756	35.5692	24.9152	2.87746	26.4686	2.87746	781	167	11	72.9828	386	41	383	41
2015	15-59_1	SD	117.433	36.0871	190	12.7656	10.6386	28.4732	1034.64	29.922	-7.44175	37.3638	24.8695	-0.71875	24.8695	-0.71875	731	231	7	110.83	473	26	473	26
2023	23-2-1_1	SD	116.644	36.9402	23	13.1653	9.91781	25.6833	1086.43	31.1565	-7.45925	38.6157	26.0361	-0.8655	26.0361	-0.8655	594	194	4	120.334	409	15	409	15
2023	23-2-16_1	HB	116.305	39.4445	26	12.2522	11.8146	28.7992	1111.24	30.7652	-10.259	41.0243	25.1742	-2.19179	25.1742	-2.19179	566	223	1	151.056	459	9	459	9
2013	13-41_1	SD	118.177	36.1909	283	11.7183	11.016	29.2724	1025.84	28.969	-8.66375	37.6328	23.7227	-1.64825	23.7227	-1.64825	754	239	8	111.103	487	28	487	28
2013	13-56_1	HN	114.825	34.8622	73	14.2569	10.46	28.9481	987.097	31.35	-4.78375	36.1338	24.6678	1.60017	26.059	1.60017	626	169	7	94.4119	367	27	362	27
2015	15-68_1	SD	116.203	34.9635	42	14.2855	10.2671	28.3423	1002.64	31.2747	-4.9505	36.2253	26.2093	1.37033	26.2093	1.37033	680	189	11	96.237	403	37	403	37
2015	15-83_1	SD	115.851	35.0179	44	14.1496	10.5347	28.7868	1004.26	31.3095	-5.286	36.5955	24.7468	1.23154	26.144	1.23154	659	186	9	98.0141	394	32	392	32
2018	18-3_1	SD	117.173	35.12	73	13.8099	10.7027	29.1828	1009.14	30.8767	-5.798	36.6747	25.7842	0.791958	25.7842	0.791958	700	204	10	102.793	444	36	444	36
2023	W-100_1	HLJ	128.476	45.491	114.9	3.33606	12.6862	23.8607	1492.24	27.3088	-25.859	53.1677	20.5888	-16.3793	20.5888	-16.3793	578	147	4	101.439	365	15	365	15
2023	W-83_1	JL	124.443	43.2724	197	6.33855	11.6909	24.2574	1363.01	27.8978	-20.2975	48.1953	22.1528	-11.5703	22.1528	-11.5703	618	175	5	106.3	402	17	402	17
2023	23-3-44_1	SD	120.515	36.7122	35	12.3499	8.65608	25.374	978.328	28.0938	-6.02025	34.114	23.7582	-0.189083	23.7582	-0.189083	715	190	9	100.97	439	29	439	29
2023	W-2_1	JS	120.362	33.0659	18.31	14.6415	8.42206	26.0838	911.978	30.2967	-1.99175	32.2885	25.5999	3.22371	25.5999	3.22371	1003	220	29	70.3685	502	93	502	93
2023	NT2_1	JS	120.978	31.9781	4	15.3754	6.89196	22.6663	886.134	30.3538	-0.0525	30.4062	25.9699	6.97388	25.9699	4.35563	1020	170	31	55.1516	445	114	445	114
2013	MT-13-22_1	HillX	110.467	34.8603	359	13.7367	11.4653	30.4168	986.776	31.4743	-6.21975	37.694	24.0257	1.10158	25.563	1.10158	562	109	5	74.8104	290	19	257	19
2015	15-9_1	AH	117.917	33.4887	20	15.1701	9.85879	28.1069	965.285	31.498	-3.578	35.076	26.7483	2.85325	26.7483	2.85325	763	201	23	86.1814	433	72	433	72
2023	23-2-37_1	HillX	112.875	36.8382	1004	9.28065	12.9932	32.1415	1030.59	27.8855	-12.5395	40.425	19.7485	-4.12087	21.3604	-4.12087	569	151	4	102.794	358	16	350	16
2019	19-3_1	SD	116.236	36.8516	30	13.1869	10.5071	26.7434	1096.76	31.412	-7.8765	39.2885	26.1203	-1.00158	26.1203	-1.00158	564	183	6	119.896	387	18	387	18
2023	23-1-32_1	HN	113.611	33.5373	74	14.9972	10.3315	29.0881	953.404	31.853	-3.665	35.518	26.5213	2.80725	26.5213	2.80725	785	172	11	74.3775	394	43	394	43
2016	16-8_1	SD	116.823	36.1349	159	13.1338	10.4993	28.1049	1037.11	30.4508	-6.90675	37.3575	25.3338	-0.343208	25.3338	-0.343208	691	216	6	110.64	446	22	446	22
2015	15-112_1	HB	118.09	39.5815	10	11.8338	11.2486	27.7182	1118.76	30.0963	-10.4858	40.582	24.8101	-2.69729	24.8101	-2.69729	620	199	4	127.467	451	15	451	15
2015	15-86_1	HN	115.834	34.4053	47	14.4569	10.3589	28.7363	993.641	31.4825	-4.56575	36.0482	26.4058	1.76421	26.4058	1.76421	716	198	11	93.6159	414	39	414	39
2015	15-54_1	HN	113.086	33.1818	158	15.0281	10.2302	29.5843	931.89	31.0828	-3.497	34.5798	24.7877	3.05362	26.2107	3.05362	848	170	14	67.9197	401	50	395	50
2015	15-22_1	JS	119.146	34.4471	4	13.7312	9.2401	26.754	958.323	29.6998	-4.8375	34.5373	25.231	1.54317	25.231	1.54317	832	222	13	95.8968	505	48	505	48
2023	23-1-18_1	AH	116.259	33.1915	29	15.2026	10.075	28.6117	968.303	31.704	-3.50875	35.2127	26.8267	2.85142	26.8267	2.85142	794	193	15	76.492	409	57	409	57
2015	15-97_1	HillX	111.482	35.6473	466	12.7424	11.5681	30.0549	1008.11	30.9403	-7.54975	38.49	23.1771	-0.209667	24.756	-0.209667	540	124	5	86.3467	309	17	283	17
2023	23-3-50_1	SD	119.394	36.9338	6	12.6766	10.3785	27.7269	1031.15	29.981	-7.45	37.431	24.8034	-0.676458	24.8034	-0.676458	663	197	8	106.616	420	26	420	26
2023	W-68_1	HLJ	127.147	46.741	182.5	2.98119	11.4391	21.4862	1564.04	26.935	-26.3043	53.2393	20.9615	-17.6846	20.9615	-17.6846	531	152	3	110.955	355	12	355	12
2023	23-1-22_1	AH	115.268	33.046	37	15.2727	9.8654	28.4146	948.742	31.748	-2.9715	34.7195	26.6787	3.17458	26.6787	3.17458	862	200	13	72.8615	425	58	425	58
2021	21-24_1	HN	115.705	34.1196	46	14.6308	10.5092	29.1492	978.894	31.58	-4.47325	36.0532	26.3832	2.10542	26.3832	2.10542	760	207	12	89.8976	425	44	425	44
2015	15-42_1	SX	110.253	34.5503	525	13.5985	10.8571	29.508	974.597	31.199	-5.59475	36.7938	23.8222	1.13908	25.3447	1.13908	596	114	6	72.7291	300	21	267	21
2021	21-19_1	JS	119.211	34.0887	5	13.9805	8.92542	26.481	945.026	29.602	-4.103	33.705	25.2986	4.149	25.2986	1.98308	784	190	17	85.9292	448	60	448	61
2021	21-27_1	JS	118.222	33.4657	11	14.9888	9.51304	27.5295	954.4	31.0537	-3.502	34.5557	26.4557	2.82592	26.4557	2.82592	784	212	25	87.7234	445	77	445	77
2023	23-1-30_1	HN	114.618	33.5489	51	15.0159	10.3092	29.1539	955.589	31.8797	-3.4815	35.3612	25.2425	2.86875	26.5667	2.86875	785	189	12	77.4719	401	48	398	48
2023	W-101_1	HaiN	109.177	18.4276	26	24.7572	6.93596	46.0869	303.056	31.397	16.3472	15.0497	26.4867	21.4449	27.9198	20.5983	1410	276	22	77.1448	738	75	392	87
2023	W-128_1	LN	119.794	41.0349	341	8.4315	12.8511	28.9987	1201.24	28.144	-16.1723	44.3162	22.3553	-7.19413	22.3553	-7.19413	505	159	2	121.358	358	7	358	7
2023	23-2-34_1	HillX	112.276	37.6064	765	9.91813	13.4909	32.4972	1048.71	28.9522	-12.5618	41.514	20.461	-3.70283	22.1295	-3.70283	435	112	3	104.458	278	12	271	12
2013	MMT-13-11_1	SD	119.227	36.7807	14	12.6517	10.8569	28.5268	1037.61	30.216	-7.8425	38.0585	24.8595	-0.809208	24.8595	-0.809208	686	207	8	107.346	435	27	435	27
2015	15-103_1	SD	116.873	37.1962	21	13.1523	10.3145	26.3306	1095.23	31.304	-7.869	39.173	26.0594	-1.01892	26.0594	-1.01892	535	176	3	124.874	382	13	382	13
2021	21-11_1	AH	115.892	33.6228	35	15.0061	10.4598	29.1421	971	31.8137	-4.07875	35.8925	26.6838	2.62392	26.6838	2.62392	792	205	13	82.8422	424	51	424	51
2023	23-2-4_1	SD	116.41	37.3758	24	13.093	10.473	26.3401	1116.43	31.455	-8.3055	39.7605	26.2644	-1.30083	26.2644	-1.30083	523	176	4	126.082	373	14	373	14
2023	NT1_1	JS	120.977	31.9781	4	15.3754	6.89196	22.6663	886.134	30.3538	-0.0525	30.4062	25.9699	6.97388	25.9699	4.35563	1020	170	31	55.1516	445	114	445	114
2023	23-1-2_1	SD	116.302	35.9186	41	13.5871	9.94354	26.9672	1030.45	30.8835	-5.98925	36.8727	25.823	0.3055	25.823	0.3055	633	190	7	106.182	398	24	398	24
2023	23-3-64_1	SD	117.014	37.7413	14	13.0786	10.9534	27.5731	1102.13	31.2507	-8.47425	39.725	25.9575	-1.24488	25.9575	-1.24488	507	174	4	128.875	369	13	369	13
2023	23-3-12_1	JS	117.699	34.2778	29	14.4444	9.97181	28.0821	982.078	30.8965	-4.613	35.5095	26.1629	1.83104	26.1629	1.83104	683	176	15	93.7229	422	54	422	54
2023	23-3-31_1	SD	118.591	36.7558	46	13.3384	11.3052	28.9303	1059.84	31.2215	-7.856	39.0775	24.5523	-0.49925	25.7984	-0.49925	678	220	7	113.24	440	25	438	25
2013	13-57_1	SD	117.238	37.7359	11	13.1163	10.8197	27.3874	1098.23	31.2985	-8.20775	39.5062	25.9777	-1.1475	25.9777	-1.1475	527	182	4	127.931	380	14	380	14
2023	23-2-6	HB	116.182	37.8687	19	12.9529	11.1743	26.909	1142.65	31.8875	-9.63875	41.5262	26.4435	-1.65692	26.4435	-1.65692	436	145	4	127.841	318	13	318	13
2023	23-2-7_1	HB	116.286	37.8927	16	12.9529	11.1743	26.909	1142.65	31.8875	-9.63875	41.5262	26.4435	-1.65692	26.4435	-1.65692	436	145	4	127.841	318	13	318	13
2015	15-66_1	HillX	110.455	34.8728	347	13.7367	11.4653	30.4168	986.776	31.4743	-6.21975	37.694	24.0257	1.10158	25.563	1.10158	562	109	5	74.8104	290	19	257	19
2023	23-3-32_1	SD	118.763	36.7228	41	13.2478	11.4059	28.9937	1059.4	31.4215	-7.91775	39.3392	25.7542	-0.564917	25.7542	-0.564917	704	226	8	112.122	454	27	454	27
2023	23-2-41_1	HillX	113.393	36.5057	729	9.92527	12.0022	31.2091	1009.23	27.8625	-10.595	38.4575	20.1879	-3.16438	21.8889	-3.16438	606	166	5	102.382	379	17	368	17
2013	MT-13-25_1	HB	115.973	37.3533	30	13.0805	11.1696	27.2139	1128.77	32.0835	-8.96025	41.0438	26.3412	-1.52571	26.3412	-1.52571	489	157	5	124.489	349	16	349	16
2023	FZ1_1	JX	116.37	27.62	85	17.0743	7.97781	26.3793	804.661	31.9028	1.66	30.2428	21.112	8.58017	26.552	6.78088	1766	315	47	61.3832	847	180	577	228
2013	13-47_1	SD	117.977	37.3882	10	13.5064	10.8101	27.6724	1088.76	31.5035	-7.561	39.0645	26.2367	-0.704583	26.2367	-0.704583	587	197	5	118.582	398	19	398	19
2023	YZGJ1_1	JS	119.377	32.4027	10	15.5948	8.39854	25.4341	939.537	31.754	-1.26675	33.0207	26.8843	3.77225	26.8843	3.77225	1017	213	29	64.8313	488	101	488	101
2023	23-1-14_1	HN	116.46	34.1172	39	14.7011	10.1161	28.3157	992.234	31.4972	-4.22875	35.726	26.6172	2.02887	26.6172	2.02887	716	196	14	91.0287	411	47	411	47
2023	W-138_1	SX	108.404	34.2432	414	13.0476	9.81627	28.5641	920.8	29.8477	-4.518	34.3657	22.8198	1.38583	24.2921	1.38583	627	109	5	71.1145	306	20	263	20
2015	15-34_1	SD	118.087	34.7666	37	13.8498	10.3426	28.8568	987.135	30.3503	-5.49075	35.841	25.5733	2.976	25.5733	1.16233	712	186	10	98.7098	456	44	456	44
2015	15-67_1	HillX	111.231	35.3629	470	12.9367	11.8292	30.6655	1004.79	31.1408	-7.43425	38.575	23.3667	0.0452084	24.9403	0.0452084	552	125	4	85.1596	311	15	285	15
2013	13-50_1	SD	116.578	35.9553	55	13.5091	10.7691	28.5342	1036.77	31.1122	-6.629	37.7412	25.7817	0.0812084	25.7817	0.0812084	674	207	7	108.167	429	24	429	24
2021	21-10_1	SD	116.019	35.4054	42	13.9888	10.744	28.9362	1018.63	31.3918	-5.73825	37.13	26.1162	0.853625	26.1162	0.853625	651	188	9	101.134	397	30	397	30
2021	21-12_1	AH	115.786	33.9576	42	14.8613	10.4171	29.2063	966.389	31.6157	-4.0515	35.6672	25.2315	2.46062	26.4237	2.46062	784	212	13	87.9445	432	50	431	50
2023	23-1-17_1	AH	116.338	33.1936	28	15.195	10.0067	28.4561	972.037	31.6055	-3.55975	35.1653	26.8405	2.77592	26.8405	2.77592	783	190	17	76.2203	405	60	405	60
2013	MMT-13-6_1	HillX	111.924	37.0327	754	10.9331	13.3117	32.7559	1026.59	29.9848	-10.6543	40.639	21.3181	-2.37775	22.9759	-2.37775	461	117	4	103.124	295	16	281	16
2013	MMT-13-19_1	SD	119.65	36.764	47	12.5804	10.2242	27.7763	1014.31	29.5035	-7.3055	36.809	24.488	-0.542042	24.488	-0.542042	675	194	8	104.004	421	26	421	26
2015	15-55_1	SD	119.197	36.0314	77	12.4167	10.2494	28.0278	1003.19	28.9802	-7.58825	36.5685	24.2073	-0.58775	24.2073	-0.58775	756	222	8	104.771	472	28	472	28
2023	23-1-16_1	AH	116.416	33.4681	29	15.1395	10.0888	28.559	974.605	31.5885	-3.73775	35.3263	26.8105	2.69379	26.8105	2.69379	765	191	17	79.2191	404	57	404	57
2021	21-2_1	SD	117.968	35.687	179	12.7373	10.9707	29.5212	1020.47	29.7412	-7.42075	37.162	24.657	-0.580583	24.657	-0.580583	755	235	8	108.964	488	30	488	30
2023	W-23_1	GZ	105.542	26.4713	1105.3	14.0212	7.97523	32.0661	630.769	25.712	0.84075	24.8713	21.1989	5.60379	21.1989	5.60379	1170	228	18	75.5702	584	59	584	59
2016	16-12_1	SD	117.85	36.6622	109	13.2423	10.8136	28.3711	1052.55	30.8407	-7.27425	38.115	25.5497	-0.50875	25.5497	-0.50875	703	227	8	112.645	457	27	457	27
2023	23-1-44_1	HN	111.055	34.0599	562	12.9243	11.3717	31.8387	911.879	29.8792	-5.83725	35.7165	22.6114	1.26529	23.9563	1.26529	677	136	7	73.6771	341	25	311	25
2023	23-1-76_1	SD	116.177	36.266	39	13.478	10.4354	27.6528	1046.73	31.0715	-6.66575	37.7373	25.8886	-0.0483751	25.8886	-0.0483751	615	191	6	110.762	399	21	399	21
2023	23-3-20_1	JS	119.121	34.6477	1	13.783	8.88488	26.1653	956.712	29.6733	-4.2835	33.9567	25.2337	1.61767	25.2337	1.61767	866	239	12	98.674	529	45	529	45
2023	HZ3_1	ZJ	120.286	30.1708	13	16.6825	8.19677	25.6161	872.286	32.6172	0.61875	31.9985	24.7221	7.93213	27.1153	5.70554	1318	188	43	43.7416	475	153	466	180
2013	MT-13-26_1	HB	116.13	38.196	13	12.9995	11.4729	27.2179	1154.96	32.148	-10.004	42.152	26.6187	-1.67796	26.6187	-1.67796	405	133	3	129.139	300	14	300	14
2015	15-52_1	HN	115.317	36.0561	46	13.5336	11.0423	28.7217	1043.9	31.6993	-6.74675	38.446	24.3665	0.0654167	25.9632	0.0654167	547	152	7	104.171	347	25	342	25
2023	23-3-4_1	SD	117.082	35.5932	86	13.5763	10.9331	29.3053	1023.47	30.889	-6.4185	37.3075	25.6765	0.334167	25.6765	0.334167	703	218	8	107.657	448	28	448	28
2013	MT-13-17_1	AH	116.971	33.6521	28	15.2789	10.0253	28.2934	987.846	31.8328	-3.60075	35.4335	27.1049	2.66458	27.1049	2.66458	710	183	18	84.0694	393	59	393	59
2021	21-5_1	SD	116.795	36.0081	148	13.1338	10.4993	28.1049	1037.11	30.4508	-6.90675	37.3575	25.3338	-0.343208	25.3338	-0.343208	691	216	6	110.64	446	22	446	22
2023	23-1-66_1	HN	114.254	35.5715	71	14.1433	10.6697	28.7586	999.864	31.669	-5.432	37.101	24.5709	1.31992	26.0358	1.31992	553	151	3	102.322	341	16	340	16
2013	13-48_1	HN	114.526	35.581	60	14.0923	10.6764	28.6858	1008.76	31.612	-5.60625	37.2183	24.6078	1.10713	26.0799	1.10713	567	157	5	102.216	350	20	348	20
2013	13-52_1	HB	114.486	36.7759	67	13.5074	11.4295	28.821	1070.2	32.2195	-7.43725	39.6568	24.3185	-0.345833	26.0906	-0.345833	555	163	2	113.665	365	10	358	10
2013	MMT-13-24_1	SD	119.949	37.1826	53	12.4502	9.32967	25.8837	1016.49	29.535	-6.50957	36.0446	24.443	-0.597635	24.443	-0.597635	643	184	8	104.754	404	26	404	26
2023	23-3-63_1	SD	117.163	37.6598	11	13.0859	10.7391	27.091	1099.58	31.3622	-8.2785	39.6407	26.0142	-1.14962	26.0142	-1.14962	516	176	4	127.902	374	13	374	13
2023	23-3-7_1	SD	117.213	35.0082	63	13.8099	10.7027	29.1828	1009.14	30.8767	-5.798	36.6747	25.7842	0.791958	25.7842	0.791958	700	204	10	102.793	444	36	444	36
2023	23-1-24_1	HN	114.565	32.983	48	15.2129	9.83788	28.4346	944.424	31.5875	-3.01075	34.5983	26.5661	3.19242	26.5661	3.19242	907	198	14	69.3979	436	61	436	61
2023	23-1-81-2_1	SD	115.711	36.2718	40	13.4781	10.947	28.4701	1047.79	31.5182	-6.93275	38.451	25.9393	-0.0462501	25.9393	-0.0462501	564	170	7	107.851	360	23	360	23
2023	23-3-55_1	SD	118.588	37.4548	4	13.5743	10.2009	26.6882	1078.68	31.2585	-6.964	38.2225	26.1874	-0.483375	26.1874	-0.483375	612	198	6	114.525	404	22	404	22
2015	15-24_1	AH	117.307	33.6846	23	15.0112	10.0356	28.1316	986.788	31.5963	-4.0775	35.6738	26.8205	2.37779	26.8205	2.37779	687	181	17	88.5687	397	58	397	58
2015	15-3_1	AH	115.965	33.0174	30	15.3059	9.92483	28.4726	952.893	31.681	-3.1765	34.8575	26.7439	3.14037	26.7439	3.14037	824	192	13	72.7021	406	58	406	58
2015	15-75_1	HN	114.69	35.7622	58	13.9834	10.9127	29.1089	1015.38	31.5002	-5.989	37.4893	24.5133	0.85125	25.9914	0.85125	557	156	5	103.468	349	21	343	21
2023	W-61_1	HLJ	129.458	44.5736	285	3.93657	12.3524	24.3169	1422.86	26.915	-23.8825	50.7975	20.4131	-14.8436	20.4131	-14.8436	565	130	3	98.3124	350	13	350	13
2015	15-56_1	SD	116.044	34.8465	42	14.2852	10.3243	28.5382	1000.09	31.2752	-4.902	36.1772	26.2261	1.42675	26.2261	1.42675	675	189	10	96.9311	400	35	400	35
2015	15-74_1	HillX	110.989	35.6104	394	13.2636	11.9319	30.3623	1022.03	31.8375	-7.461	39.2985	23.8623	0.169167	25.5006	0.169167	529	116	4	83.9239	297	15	268	15
2015	15-8_1	HB	114.618	37.6219	50	13.3767	11.5702	28.7101	1074.83	32.261	-8.03925	40.3003	26.0158	-0.576708	26.0158	-0.576708	505	152	3	116.582	338	11	338	11
2023	23-1-38_1	HN	112.647	33.913	307	13.8715	10.5788	30.7838	894.311	29.8577	-4.507	34.3647	23.1945	2.32717	24.6493	2.32717	739	155	9	73.6675	374	33	351	33
2023	23-3-14_1	JS	118.373	33.9529	16	14.4784	9.38944	27.2323	961.472	30.4897	-3.98925	34.479	25.9574	9.47363	25.9574	2.17946	766	204	20	96.1774	470	64	470	68
2021	21-7_1	SD	116.141	35.8837	38	13.6495	10.4967	28.0153	1029.9	31.1425	-6.32525	37.4678	25.9154	0.385625	25.9154	0.385625	621	186	7	105.278	388	24	388	24
2023	AHCZ1_1	AH	117.7	32.53	75	15.2427	8.94777	26.8639	933.61	30.9552	-2.3525	33.3078	26.3841	3.36996	26.3841	3.36996	896	196	25	66.6042	438	87	438	87
2013	MT-13-5_1	SD	119.227	36.7807	14	12.6517	10.8569	28.5268	1037.61	30.216	-7.8425	38.0585	24.8595	-0.809208	24.8595	-0.809208	686	207	8	107.346	435	27	435	27
2015	15-6_1	HB	114.38	36.3804	70	13.5891	11.0386	28.4953	1051.41	31.7435	-6.995	38.7385	24.4211	0.040375	26.0363	0.040375	545	157	2	112.964	359	11	351	11
2023	23-1-13_1	HN	116.514	34.1848	41	14.5756	10.0832	28.2542	995.207	31.3412	-4.34625	35.6875	26.4988	1.81954	26.4988	1.81954	697	192	13	93.0664	408	45	408	45
2023	23-3-51_1	SD	118.893	37.2468	0	13.3919	9.22253	25.0146	1056.93	30.7311	-6.13754	36.8686	25.8083	-0.290103	25.8083	-0.290103	598	192	4	115.138	394	17	394	17
2023	W-93_1	JL	126.47	43.4642	303	3.13324	12.2124	23.9624	1418.21	24.7332	-26.2315	50.9648	19.3702	-15.9258	19.3702	-15.9258	719	196	6	102.233	458	22	458	22
2015	15-70_1	SD	117.596	34.7786	194	13.9643	10.4729	28.8578	1000.21	30.9048	-5.3865	36.2913	25.8717	1.10808	25.8717	1.10808	700	192	11	99.1517	444	43	444	43
2023	23-1-64_1	HillX	113.18	35.8615	1080	8.64217	11.9661	31.8204	979.501	25.922	-11.6833	37.6053	18.6294	-4.072	20.205	-4.072	648	164	6	94.5327	382	22	380	22
2023	W-141_1	HN	114.845	33.1812	42	15.0811	10.1581	28.7925	956.268	31.8185	-3.462	35.2805	26.6004	2.91717	26.6004	2.91717	838	197	12	74.5891	417	53	417	53
2013	13-51_1	SD	117.45	36.2517	161	12.8748	10.5128	27.8808	1046.15	30.1432	-7.56275	37.706	25.1264	-0.748833	25.1264	-0.748833	716	228	6	112.212	466	23	466	23
2016	16-2_1	SD	117.123	36.4909	285	12.0485	9.85756	26.7119	1032.79	29.1308	-7.7725	36.9033	24.1593	-1.39029	24.1593	-1.39029	718	227	5	113.36	471	20	471	20
2013	13-35_1	HB	115.274	36.9816	36	13.2377	11.7219	28.6578	1110.98	32.3467	-8.55625	40.903	26.2091	-1.31633	26.2091	-1.31633	514	160	4	114.039	336	17	336	17
2023	23-3-48_1	SD	119.793	36.4783	11	12.6997	9.41685	26.5323	993.032	29.0382	-6.45375	35.492	24.3419	-0.103167	24.3419	-0.103167	704	192	9	99.759	430	29	430	29
2013	MMT-13-13_1	SD	116.578	35.9553	55	13.5091	10.7691	28.5342	1036.77	31.1122	-6.629	37.7412	25.7817	0.0812084	25.7817	0.0812084	674	207	7	108.167	429	24	429	24
2013	13-40_1	SD	116.366	37.4413	24	13.093	10.473	26.3401	1116.43	31.455	-8.3055	39.7605	26.2644	-1.30083	26.2644	-1.30083	523	176	4	126.082	373	14	373	14
2023	23-3-18_1	JS	118.698	34.3751	16	13.8715	9.36233	26.9763	967.957	29.996	-4.70975	34.7057	25.4302	1.50104	25.4302	1.50104	803	216	15	97.6523	499	49	499	49
2013	MMT-13-28_1	SD	116.405	35.4286	41	13.942	10.7563	28.859	1021.73	31.4405	-5.83125	37.2718	26.1358	0.818	26.1358	0.818	669	192	8	102.476	414	28	414	28
2016	16-9_1	SD	117.094	36.2059	232	11.7382	9.62106	26.4912	1021.51	28.7157	-7.60225	36.318	23.7655	-1.49642	23.7655	-1.49642	740	232	6	111.443	481	24	481	24
2023	23-1-45_1	HN	111.055	34.0599	562	12.9243	11.3717	31.8387	911.879	29.8792	-5.83725	35.7165	22.6114	1.26529	23.9563	1.26529	677	136	7	73.6771	341	25	311	25
2023	W-137_1	SX	107.881	32.4276	1028	12.3159	8.18044	27.7345	784.164	27.089	-2.4065	29.4955	21.0105	2.43467	21.9218	2.43467	1010	177	11	69.4464	472	40	433	40
2023	23-1-42_1	HN	111.629	33.7809	751	11.4073	10.1907	30.5952	861.456	27.2418	-6.0665	33.3083	20.649	0.408833	21.8603	0.408833	801	155	8	71.1809	392	33	366	33
2023	23-3-9_1	SD	117.521	36.8755	20	13.5564	10.5744	27.5436	1066.53	31.1562	-7.23525	38.3915	26.0318	-0.357208	26.0318	-0.357208	640	210	5	116.652	429	19	429	19
2015	15-91_1	SD	117.173	35.12	73	13.8099	10.7027	29.1828	1009.14	30.8767	-5.798	36.6747	25.7842	0.791958	25.7842	0.791958	700	204	10	102.793	444	36	444	36
2023	23-2-5_1	HB	116.562	37.886	12	13.0371	10.9605	27.1173	1121.92	31.5063	-8.9125	40.4188	26.2078	-1.41008	26.2078	-1.41008	463	157	4	129.56	340	13	340	13
2013	MT-13-30_1	HB	115.566	38.0069	29	13.0901	11.3514	27.6465	1122.89	31.8018	-9.2575	41.0592	26.2838	-1.36908	26.2838	-1.36908	414	134	4	127.961	304	13	304	13
2023	W-53_1	HN	113.702	33.6647	75	15.0179	10.372	29.1901	954.7	31.8312	-3.7015	35.5327	26.5677	2.82479	26.5677	2.82479	786	175	11	75.3859	399	43	399	43
2015	15-118_1	SX	108.715	34.3355	387	13.1026	10.3108	28.6081	952.342	30.8545	-5.187	36.0415	23.2039	1.04421	24.7733	1.04421	607	110	5	70.9333	298	21	261	21
2015	15-40_1	BJ	116.149	39.7543	50	12.2047	11.8691	29.136	1103.34	30.8127	-9.92425	40.737	25.027	-2.09558	25.027	-2.09558	577	214	2	143.702	458	8	458	8
2015	15-82_1	HillX	110.853	35.9764	971	8.75966	11.2338	30.1936	964.195	26.277	-10.9288	37.2057	18.8517	-3.65629	20.228	-3.65629	538	118	3	89.5577	314	12	290	12
2021	21-14_1	AH	117.022	34.1512	39	14.6153	10.1358	28.3691	990.832	31.2463	-4.482	35.7282	26.429	1.85983	26.429	1.85983	686	184	15	91.5832	405	52	405	52
2023	23-3-19_1	JS	118.721	34.4562	18	13.8715	9.36233	26.9763	967.957	29.996	-4.70975	34.7057	25.4302	1.50104	25.4302	1.50104	803	216	15	97.6523	499	49	499	49
2013	MMT-13-5_1	SD	116.971	36.104	117	13.1159	10.5242	28.1856	1036.53	30.3682	-6.9705	37.3387	25.3201	-0.335375	25.3201	-0.335375	703	221	6	111.059	455	22	455	22
2016	16-1_1	SD	117.059	36.7227	24	13.627	9.4759	25.2092	1069.7	31.1365	-6.4525	37.589	26.1974	-0.264208	26.1974	-0.264208	688	222	5	116.076	459	19	459	19
2023	W-133_1	HLJ	125.42	45.6637	154	4.63219	11.7409	22.4017	1514.68	28.0033	-24.4075	52.4108	22.1915	-15.19	22.1915	-15.19	488	154	2	115.741	335	9	335	9
2013	13-49_1	SD	115.947	35.322	43	14.0647	10.7405	29.128	1010.03	31.3002	-5.57325	36.8735	24.6994	1.04354	26.1019	1.04354	648	184	9	99.2383	390	30	389	30
2015	15-106_1	HillX	112.182	37.1956	766	10.3547	13.6104	33.0088	1041.54	29.297	-11.9358	41.2327	20.798	-3.18563	22.4851	-3.18563	449	116	3	105.628	289	13	280	13
2021	21-26_1	JS	119.721	33.3935	1	14.5295	8.40596	25.7429	928.02	30.0942	-2.55925	32.6535	25.6751	2.82483	25.6751	2.82483	881	214	29	77.2274	467	87	467	87
2023	23-2-3_1	SD	116.481	37.2224	21	13.0875	10.2589	26.0101	1107.6	31.3827	-8.05925	39.442	26.193	-1.18267	26.193	-1.18267	540	180	4	124.278	381	14	381	14
2023	23-3-11_1	JS	117.607	34.3914	32	14.2871	10.2911	28.6582	991.096	30.9268	-4.983	35.9098	26.0692	1.5275	26.0692	1.5275	684	181	13	95.4029	425	49	425	49
2023	23-3-30_1	SD	118.703	36.5625	211	12.6915	11.3248	29.3142	1039.18	30.4715	-8.161	38.6325	24.9331	-0.893583	24.9331	-0.893583	721	230	8	111.421	463	29	463	29
2015	15-50_1	SD	118.271	34.7689	45	13.7124	10.0056	28.1293	984.135	30.245	-5.32525	35.5703	25.403	1.04929	25.403	1.04929	734	194	10	98.8431	469	45	469	45
2015	15-94_1	SD	118.487	36.6904	87	13.3625	11.1833	28.7859	1058.75	31.1635	-7.68625	38.8498	25.7832	-0.482083	25.7832	-0.482083	679	220	7	113.256	440	25	440	25
2023	23-2-11_1	HB	116.051	38.61	12	12.9869	11.6449	27.9691	1135.48	31.8587	-9.776	41.6348	26.2917	-1.57075	26.2917	-1.57075	442	152	3	135.756	336	12	336	12
2023	23-2-35_1	HillX	112.458	37.3937	774	10.2818	13.7915	33.1891	1046.82	29.168	-12.3863	41.5542	20.742	-3.34779	22.4157	-3.34779	439	114	3	105.106	281	12	274	12
2023	W-131_1	LN	119.919	41.2619	255	8.4695	13.0579	29.0281	1218.73	28.4813	-16.5025	44.9837	22.5667	-7.40671	22.5667	-7.40671	493	156	2	120.5	348	7	348	7
2023	W-145_1	HN	114.852	33.2456	43	15.0811	10.1581	28.7925	956.268	31.8185	-3.462	35.2805	26.6004	2.91717	26.6004	2.91717	838	197	12	74.5891	417	53	417	53
2023	W-5_1	NX	106.19	37.87	1132	9.27249	12.8404	30.5118	1063.28	28.663	-13.4205	42.0835	20.1798	-4.604	21.6388	-4.604	220	60	1	97.0765	135	4	126	4
2015	15-43_1	HN	115.323	34.5106	59	14.3524	10.6074	29.4749	985.265	31.2413	-4.74675	35.988	24.8143	1.70171	26.1191	1.70171	678	184	9	92.4807	391	33	385	33
2023	23-1-53_1	SX	110.047	35.0378	534	12.9271	11.7682	30.8564	987.451	31.0047	-7.13375	38.1385	23.198	0.3	24.7929	0.3	565	110	5	77.8437	301	17	266	17
2023	23-1-81_1	SD	115.711	36.2718	40	13.4781	10.947	28.4701	1047.79	31.5182	-6.93275	38.451	25.9393	-0.0462501	25.9393	-0.0462501	564	170	7	107.851	360	23	360	23
2023	23-2-53_1	SD	115.589	36.759	38	13.0653	11.203	27.8369	1102.76	31.9942	-8.25075	40.245	26.1442	-1.23121	26.1442	-1.23121	497	159	6	119.358	340	22	340	22
2023	AJ2_1	ZJ	119.663	31.0635	85	15.0711	7.8095	24.6841	881.602	30.6055	-1.03225	31.6377	25.6756	6.13721	25.6756	3.98438	1185	193	31	52.9289	497	122	497	136
2013	MT-13-16_1	HB	118.186	39.6366	49	11.6823	11.3469	27.7733	1121.89	30.1238	-10.7317	40.8555	24.7169	-2.86996	24.7169	-2.86996	621	200	4	127.729	452	14	452	14
2013	13-59_1	HN	113.049	33.0138	151	15.1021	10.2659	29.846	923.96	30.9878	-3.4085	34.3963	24.8271	3.22988	26.1602	3.22988	873	172	14	66.4498	405	53	401	53
2021	21-17_1	JS	119.159	34.2534	4	13.9395	9.27983	27.009	954.847	29.8282	-4.53	34.3582	25.3707	1.79221	25.3707	1.79221	811	209	14	92.4253	483	52	483	52
2023	23-3-22_1	JS	118.891	34.8368	16	13.3824	9.46698	27.3949	975.461	29.3067	-5.25075	34.5575	24.8757	0.83075	24.8757	0.83075	876	246	13	100.94	544	43	544	43
2023	W-146-2_1	HN	114.883	33.2292	39	15.0811	10.1581	28.7925	956.268	31.8185	-3.462	35.2805	26.6004	2.91717	26.6004	2.91717	838	197	12	74.5891	417	53	417	53
2021	21-21_1	JS	117.917	33.9584	22	14.8619	9.7441	27.6587	973.327	31.288	-3.94175	35.2298	26.5177	2.41471	26.5177	2.41471	715	187	20	92.6473	434	63	434	63
2021	21-6_1	SD	117.775	35.9146	219	12.9599	10.8654	29.0135	1031.8	30.2472	-7.20225	37.4495	25.0395	-0.466375	25.0395	-0.466375	749	235	9	109.502	484	31	484	31
2023	23-1-6_1	SD	115.961	35.5714	42	13.889	10.7899	29.0109	1019.8	31.299	-5.8935	37.1925	26.036	0.753583	26.036	0.753583	629	184	8	102.468	385	27	385	27
2023	23-1-77_1	SD	116.394	36.5706	29	13.2191	10.2385	26.6699	1070.49	31.059	-7.33075	38.3898	25.9288	-0.5925	25.9288	-0.5925	612	196	5	115.867	410	18	410	18
2023	W-12_1	HuB	114.462	30.445	1.1	16.9974	8.25098	25.4173	902.986	32.7513	0.28925	32.462	25.6168	7.55225	27.8172	5.55971	1283	213	31	55.4684	568	128	507	130
2015	15-125_1	AH	118.282	33.9677	23	14.709	9.39267	27.1071	968.372	30.942	-3.70825	34.6502	26.2618	9.59642	26.2618	2.32912	754	200	21	95.3682	463	65	463	71
2015	15-38_1	AH	115.785	33.8827	41	14.8613	10.4171	29.2063	966.389	31.6157	-4.0515	35.6672	25.2315	2.46062	26.4237	2.46062	784	212	13	87.9445	432	50	431	50
2015	15-93_1	SD	120.586	37.0158	99	11.8713	8.89585	25.642	989.001	28.0317	-6.66075	34.6925	23.4172	-0.82825	23.4172	-0.82825	697	192	9	103.486	433	28	433	28
2016	16-3_1	SD	116.971	36.104	117	13.1159	10.5242	28.1856	1036.53	30.3682	-6.9705	37.3387	25.3201	-0.335375	25.3201	-0.335375	703	221	6	111.059	455	22	455	22
2016	16-7_1	SD	117.15	36.0898	126	13.2487	10.4433	27.9374	1039.35	30.5555	-6.8255	37.381	25.4743	-0.240958	25.4743	-0.240958	718	227	7	110.716	464	25	464	25
2019	19-01_1	SD	116.236	36.8516	30	13.1869	10.5071	26.7434	1096.76	31.412	-7.8765	39.2885	26.1203	-1.00158	26.1203	-1.00158	564	183	6	119.896	387	18	387	18
2021	21-9_1	SD	116.046	35.4288	40	13.9888	10.744	28.9362	1018.63	31.3918	-5.73825	37.13	26.1162	0.853625	26.1162	0.853625	651	188	9	101.134	397	30	397	30
2023	W-54_1	HN	113.735	33.4693	75	15.0083	10.3553	29.2012	952.073	31.7552	-3.70675	35.462	26.5037	2.83883	26.5037	2.83883	817	178	12	72.9673	406	47	406	47
2015	15-90_1	HN	113.934	35.3096	72	14.3238	10.8808	29.3035	994.241	31.7852	-5.34625	37.1315	26.1801	1.56733	26.1801	1.56733	565	148	3	97.5978	340	15	340	15
2021	21-15_1	AH	116.43	34.4565	48	14.5794	9.98063	28.2936	986.899	31.1267	-4.1485	35.2752	26.3561	1.87504	26.3561	1.87504	696	192	13	93.7219	406	43	406	43
2023	23-3-3_1	SD	117.294	35.728	156	13.3368	10.8713	29.2775	1025.15	30.4405	-6.6915	37.132	25.355	-0.00616674	25.355	-0.00616674	721	225	8	108.516	462	29	462	29
2013	MT-13-29_1	SD	117.178	34.9085	47	13.9376	10.5549	28.8596	1007.38	30.9885	-5.58475	36.5732	25.9246	0.978292	25.9246	0.978292	690	197	10	101.034	435	37	435	37
2023	W-59_1	HN	113.662	33.464	82	15.0671	10.2371	29.1287	947.507	31.6205	-3.524	35.1445	26.4948	2.93654	26.4948	2.93654	813	175	12	72.391	401	47	401	47
2015	15-17_1	TJ	117.344	39.7676	7	11.6963	11.6491	28.1753	1123.39	30.2415	-11.1035	41.345	24.7752	-2.91754	24.7752	-2.91754	556	199	3	136.351	422	11	422	11
2013	MMT-13-23_1	SX	111.526	36.0937	458	12.6401	12.0406	30.2462	1031	31.4858	-8.323	39.8088	23.3186	-0.6235	24.8847	-0.6235	507	123	4	93.0885	306	15	282	15
2023	QZ2_1	ZJ	118.965	29.0946	83	17.0011	8.22319	26.4711	832.321	32.392	1.32725	31.0647	20.95	8.46658	26.9111	6.47137	1586	275	39	52.8883	681	165	534	206
2015	15-113_1	HillX	110.719	35.6019	424	13.3907	11.8919	30.3918	1020.22	31.9373	-7.19125	39.1285	23.9785	0.319292	25.6143	0.319292	528	113	4	82.8234	294	15	264	15
2023	23-1-78_1	SD	116.263	36.4636	32	13.3231	10.4922	27.3497	1062.73	31.2	-7.163	38.363	25.9602	-0.376542	25.9602	-0.376542	606	191	6	112.942	399	21	399	21
2023	23-2-9_1	HB	116.13	38.196	13	12.9995	11.4729	27.2179	1154.96	32.148	-10.004	42.152	26.6187	-1.67796	26.6187	-1.67796	405	133	3	129.139	300	14	300	14
2015	15-12_1	HillX	111.682	36.2595	471	12.1177	11.8936	30.1357	1020.97	30.791	-8.67575	39.4668	22.6886	-1.04321	24.2248	-1.04321	497	122	4	95.4765	305	15	283	15
2016	16-11_1	SD	117.452	36.2264	166	12.8748	10.5128	27.8808	1046.15	30.1432	-7.56275	37.706	25.1264	-0.748833	25.1264	-0.748833	716	228	6	112.212	466	23	466	23
2016	16-6_1	SD	117.533	36.6855	114	13.3291	10.5764	27.8305	1055.86	30.831	-7.17175	38.0028	25.705	-0.4145	25.705	-0.4145	675	220	5	115.815	450	20	450	20
2019	19-5_1	SD	117.173	35.12	73	13.8099	10.7027	29.1828	1009.14	30.8767	-5.798	36.6747	25.7842	0.791958	25.7842	0.791958	700	204	10	102.793	444	36	444	36
2023	23-2-15_1	HB	116.31	39.448	29	12.2522	11.8146	28.7992	1111.24	30.7652	-10.259	41.0243	25.1742	-2.19179	25.1742	-2.19179	566	223	1	151.056	459	9	459	9
2023	23-3-16_1	JS	118.595	34.0057	15	14.2056	9.55665	27.5428	962.127	30.1915	-4.506	34.6975	25.7166	1.90763	25.7166	1.90763	774	204	18	95.591	476	60	476	60
2023	23-1-1_1	SD	116.478	35.9419	97	13.6097	10.5133	28.1482	1033.63	31.082	-6.26775	37.3498	25.8722	0.259125	25.8722	0.259125	655	199	7	107.406	415	24	415	24
2023	W-96_1	FJ	119.087	26.3485	755	15.9084	7.63704	29.7833	649.126	28.586	2.944	25.642	18.6383	9.52846	23.6269	7.76642	1688	297	39	59.1605	729	136	643	182
2013	13-62_1	SD	118.487	36.6904	87	13.3625	11.1833	28.7859	1058.75	31.1635	-7.68625	38.8498	25.7832	-0.482083	25.7832	-0.482083	679	220	7	113.256	440	25	440	25
2015	15-129_1	SX	109.719	34.4926	356	11.0083	9.23913	27.3315	912.108	27.464	-6.34	33.804	20.7502	-0.570708	22.1128	-0.570708	645	118	6	72.1661	322	23	287	23
2021	21-13_1	AH	116.817	34.2481	41	14.4808	10.0772	28.192	1001.05	31.2837	-4.461	35.7447	26.4668	1.642	26.4668	1.642	689	188	13	92.8375	406	46	406	46
2023	23-1-41_1	HN	112.159	34.1106	537	13.5227	10.7089	30.77	895.96	29.8948	-4.90825	34.803	22.895	1.95504	24.3255	1.95504	703	147	8	74.2523	358	29	331	29
2023	SX3_1	ZJ	120.327	29.5233	51	16.243	8.0949	25.714	845.449	31.8985	0.418	31.4805	20.0624	7.68592	26.3723	5.56917	1366	209	40	45.3725	519	150	473	174
2023	23-1-70_1	HN	115.601	35.8295	46	13.7632	10.6357	28.6658	1019.96	31.154	-5.94825	37.1022	24.4596	0.604542	25.9053	0.604542	585	172	7	102.375	360	25	355	25
2023	23-1-72_1	SD	115.638	36.0843	38	13.5717	11.1777	29.109	1038.75	31.6012	-6.79825	38.3995	24.3943	0.1795	25.9519	0.1795	558	168	6	105.891	350	22	348	22
2023	23-2-39_1	HillX	112.931	36.5191	952	9.62427	12.7409	32.2699	1017.93	27.7612	-11.721	39.4823	19.8955	-3.61821	21.5555	-3.61821	586	152	5	99.8914	361	18	355	18
2013	MT-13-4_1	AH	117.981	33.4977	23	15.1701	9.85879	28.1069	965.285	31.498	-3.578	35.076	26.7483	2.85325	26.7483	2.85325	763	201	23	86.1814	433	72	433	72
2023	W-25_1	GZ	106.37	26.24	1095.2	14.3832	7.91496	30.9777	656.918	26.3948	0.84425	25.5505	20.7353	5.7115	21.9063	5.7115	1167	222	18	72.3748	577	61	557	61
2013	13-34_1	HB	115.471	38.88	21	13.144	11.7702	28.7851	1105.18	31.8352	-9.05475	40.89	26.0559	-1.16175	26.0559	-1.16175	507	167	2	131.964	375	9	375	9
2015	15-25_1	HN	113.364	33.6325	88	15.0142	10.3041	29.0219	952.208	31.842	-3.6625	35.5045	24.9943	2.82646	26.5166	2.82646	783	169	11	73.4836	389	43	388	43
2015	15-87_1	SD	116.349	35.4133	39	13.942	10.7563	28.859	1021.73	31.4405	-5.83125	37.2718	26.1358	0.818	26.1358	0.818	669	192	8	102.476	414	28	414	28
2023	23-2-19_1	HB	115.722	39.3948	33	12.4007	12.0106	29.0018	1112.67	31.0912	-10.322	41.4132	25.32	-2.07254	25.32	-2.07254	585	219	3	144.536	464	12	464	12
2023	23-2-29_1	HillX	112.963	39.0634	854	8.11439	13.8061	31.895	1099.08	27.9468	-15.3392	43.286	20.9696	-6.10529	20.9696	-6.10529	412	110	2	109.515	268	8	268	8
2023	23-3-5_1	SD	117.072	35.4113	110	13.5858	10.9213	29.5979	1015.03	30.7227	-6.17625	36.899	25.5389	0.425125	25.5389	0.425125	713	214	10	104.168	448	34	448	34
2023	QZ6_1	ZJ	119.206	28.9132	180	16.4803	8.17702	26.5989	814.6	31.6267	0.88475	30.742	20.4293	8.07413	26.1645	6.11671	1576	272	36	51.3817	653	162	542	198
2013	RMT-13-6_1	HB	118.186	39.6366	49	11.6823	11.3469	27.7733	1121.89	30.1238	-10.7317	40.8555	24.7169	-2.86996	24.7169	-2.86996	621	200	4	127.729	452	14	452	14
2023	SX6_1	ZJ	120.595	30.0758	9	16.8758	8.06023	25.3524	864.166	32.7427	0.95	31.7927	24.8429	8.26733	27.255	6.00904	1279	187	46	42.8483	467	156	451	183
2015	15-53_1	SD	118.474	34.94	57	13.465	10.0107	28.1067	989.566	30.019	-5.59775	35.6167	25.1837	0.717917	25.1837	0.717917	778	218	10	102.067	500	40	500	40
2015	15-71_1	SD	120.165	37.0985	155	11.6176	9.12285	25.9242	998.773	28.1567	-7.03375	35.1905	23.3181	-1.24583	23.3181	-1.24583	684	190	10	102.335	425	30	425	30
2023	23-3-61_1	SD	117.508	37.7694	8	13.1898	10.9522	27.7274	1094.64	31.407	-8.0925	39.4995	26.005	-1.05683	26.005	-1.05683	558	193	4	125.328	395	15	395	15
2013	MT-13-11_1	SX	107.029	33.0738	516	14.6127	8.27223	27.2456	830.029	29.3932	-0.9685	30.3617	23.589	4.06846	24.641	4.06846	851	164	6	76.9676	439	25	389	25
2015	15-27_1	SD	115.992	36.4628	36	13.4208	10.6679	27.6986	1062.39	31.5322	-6.982	38.5142	26.0826	-0.265208	26.0826	-0.265208	573	178	7	111.293	375	22	375	22
2016	16-4_1	SD	117.667	36.2088	197	12.8765	10.6394	28.1121	1046.84	30.299	-7.5475	37.8465	25.1499	-0.748667	25.1499	-0.748667	727	232	7	111.818	472	26	472	26
2023	SX7_1	ZJ	120.573	30.0994	13	16.8758	8.06023	25.3524	864.166	32.7427	0.95	31.7927	24.8429	8.26733	27.255	6.00904	1279	187	46	42.8483	467	156	451	183
2023	W-136_1	SX	109.506	32.6948	535	13.3048	9.18144	29.6663	812.049	28.4603	-2.48875	30.949	22.2131	3.04071	23.2161	3.04071	938	168	11	67.2852	433	41	403	41
2015	15-77_1	HB	117.8	39.7687	5	11.5416	11.8404	28.4882	1126.05	29.9788	-11.5837	41.5625	24.6002	-3.15504	24.6002	-3.15504	581	196	4	131.888	432	12	432	12
2023	23-2-45_1	HB	114.523	36.8758	59	13.3982	11.3297	28.4744	1076.19	32.1037	-7.68525	39.789	24.3495	-0.548875	26.0672	-0.548875	537	167	2	115.082	352	10	349	10
2023	23-2-51_1	HB	115.653	37.0098	31	13.0605	11.5668	27.8502	1135.57	32.4465	-9.08575	41.5322	26.393	-1.73971	26.393	-1.73971	514	153	4	118.913	347	15	347	15
2023	RMT-13-007_1	SD	120.454	36.3947	22	12.8077	8.30631	24.506	970.265	28.555	-5.34	33.895	24.0864	0.343125	24.0864	0.343125	698	173	10	94.0336	413	32	413	32
2023	W-55_1	HN	113.672	33.4649	82	15.0083	10.3553	29.2012	952.073	31.7552	-3.70675	35.462	26.5037	2.83883	26.5037	2.83883	817	178	12	72.9673	406	47	406	47
2015	15-15_1	SD	120.166	36.3584	8	12.7065	8.72602	25.3746	975.455	28.5355	-5.85325	34.3887	24.1047	0.188125	24.1047	0.188125	685	177	9	96.5541	411	29	411	29
2021	21-18_1	JS	117.837	34.0144	22	14.5888	9.64269	27.4546	972.712	30.9457	-4.1765	35.1222	26.2285	2.13596	26.2285	2.13596	696	180	17	93.7971	429	58	429	58
2023	23-3-41_1	SD	120.284	37.4067	81	12.1256	9.28428	26.0748	1006.64	29.0377	-6.56859	35.6063	23.9621	-0.81407	23.9621	-0.81407	639	179	9	102.833	397	28	397	28
2021	21-4_1	SD	117.049	36.1933	153	11.7382	9.62106	26.4912	1021.51	28.7157	-7.60225	36.318	23.7655	-1.49642	23.7655	-1.49642	740	232	6	111.443	481	24	481	24
2013	13-44_1	SD	117.977	37.3882	10	13.5064	10.8101	27.6724	1088.76	31.5035	-7.561	39.0645	26.2367	-0.704583	26.2367	-0.704583	587	197	5	118.582	398	19	398	19
2023	23-2-48_1	HB	114.958	37.258	30	13.4254	11.5099	28.3812	1094.88	32.445	-8.10975	40.5547	26.2702	-0.841208	26.2702	-0.841208	516	162	3	118.705	348	11	348	11
2013	MMT-13-2_1	SD	117.45	36.2517	161	12.8748	10.5128	27.8808	1046.15	30.1432	-7.56275	37.706	25.1264	-0.748833	25.1264	-0.748833	716	228	6	112.212	466	23	466	23
2023	W-142_1	HN	114.787	33.1566	44	15.1477	10.0323	28.7228	950.376	31.6895	-3.2385	34.928	26.5835	3.05621	26.5835	3.05621	872	198	13	72.0082	427	57	427	57
2023	W-49_1	SC	105.024	30.1549	423	16.8631	6.56146	24.5485	724.422	30.3445	3.616	26.7285	25.4483	7.49733	25.4483	7.49733	1050	222	12	86.6018	576	41	576	41
2013	13-58_1	SD	116.349	35.4133	39	13.942	10.7563	28.859	1021.73	31.4405	-5.83125	37.2718	26.1358	0.818	26.1358	0.818	669	192	8	102.476	414	28	414	28
2015	15-108_1	HB	114.518	37.2929	78	13.4288	11.4003	28.6367	1068.07	32.1322	-7.67775	39.81	24.295	-0.429292	25.997	-0.429292	525	162	3	116.057	346	11	345	11
2021	21-29_1	AH	117.704	32.537	73	15.2427	8.94777	26.8639	933.61	30.9552	-2.3525	33.3078	26.3841	3.36996	26.3841	3.36996	896	196	25	66.6042	438	87	438	87
2023	23-1-80_1	SD	116.776	36.7459	25	13.3147	9.60862	25.4082	1071.92	30.8853	-6.93175	37.817	25.9708	-0.560958	25.9708	-0.560958	642	207	4	117.727	434	17	434	17
2023	23-2-18_1	HB	115.847	39.3787	40	12.3948	11.8416	28.7469	1111.64	31.0417	-10.151	41.1927	25.3339	-2.03854	25.3339	-2.03854	578	221	2	148.125	465	9	465	9
2023	23-2-44_1	HB	114.495	36.6934	54	13.5074	11.4295	28.821	1070.2	32.2195	-7.43725	39.6568	24.3185	-0.345833	26.0906	-0.345833	555	163	2	113.665	365	10	358	10
2013	MT-13-12_1	SX	108.945	34.5412	404	13.1553	10.4654	28.6146	968.604	31.1003	-5.47325	36.5735	23.4088	0.887917	25.0182	0.887917	633	117	6	73.2557	322	22	287	22
2013	MT-13-15_1	SX	108.946	34.3473	380	13.4386	10.3112	28.46	962.57	31.2747	-4.95575	36.2305	23.6226	1.23446	25.2172	1.23446	619	112	6	70.411	305	23	269	23
2013	MT-13-18_1	TJ	116.918	39.0278	7	12.7674	11.2312	28.0995	1106.99	30.7203	-9.24925	39.9695	25.5869	-1.61638	25.5869	-1.61638	522	195	2	140.773	404	12	404	12
2023	W-3_1	JS	118.82	32.3361	7.89	15.3647	8.65098	26.2982	928.476	31.0322	-1.8635	32.8957	26.4651	3.59933	26.4651	3.59933	950	208	26	65.7956	456	93	456	93
2015	15-2_1	SD	117.126	36.749	27	13.627	9.4759	25.2092	1069.7	31.1365	-6.4525	37.589	26.1974	-0.264208	26.1974	-0.264208	688	222	5	116.076	459	19	459	19
2015	15-63_1	SD	116.971	36.104	117	13.1159	10.5242	28.1856	1036.53	30.3682	-6.9705	37.3387	25.3201	-0.335375	25.3201	-0.335375	703	221	6	111.059	455	22	455	22
2023	23-2-2_1	SD	116.531	37.1376	20	13.0813	10.1322	25.9252	1095.85	31.2603	-7.82225	39.0825	26.0643	-1.048	26.0643	-1.048	561	184	4	122.232	392	14	392	14
2015	15-126_1	SD	119.762	36.389	23	12.6997	9.41685	26.5323	993.032	29.0382	-6.45375	35.492	24.3419	-0.103167	24.3419	-0.103167	704	192	9	99.759	430	29	430	29
2015	15-29_1	SX	109.22	34.3727	465	13.1154	10.2896	28.4463	957.734	30.7915	-5.3805	36.172	23.2401	0.97575	24.8202	0.97575	630	109	6	69.9216	310	24	272	24
2015	15-37_1	HB	114.623	36.347	65	13.4804	11.1014	28.4378	1060.34	31.7625	-7.275	39.0375	24.3268	-0.242333	25.9837	-0.242333	536	156	3	112.192	352	12	344	12
2023	23-3-54_1	SD	118.493	37.1857	4	13.4917	10.803	27.8043	1081.02	31.2245	-7.62925	38.8538	26.1218	-0.652417	26.1218	-0.652417	615	199	7	113.424	403	23	403	23
2013	MT-13-2_1	HN	113.596	33.8371	78	14.9314	10.6796	29.7288	955.404	31.8077	-4.11575	35.9235	26.4523	2.65917	26.4523	2.65917	729	166	10	78.5539	378	37	378	37
2013	MT-13-20_1	SD	117.072	36.6857	37	13.627	9.4759	25.2092	1069.7	31.1365	-6.4525	37.589	26.1974	-0.264208	26.1974	-0.264208	688	222	5	116.076	459	19	459	19
2015	15-89_1	SX	108.005	34.3489	563	12.4181	9.98456	28.6503	919.012	29.545	-5.30475	34.8498	22.2171	0.847333	23.7178	0.847333	642	117	4	74.7682	328	18	280	18
2021	21-23_1	HN	116.162	34.2268	43	14.5889	10.1444	28.4031	989.551	31.4562	-4.2595	35.7157	26.487	1.96125	26.487	1.96125	724	200	12	92.6113	416	42	416	42
2023	23-1-47_1	HN	110.746	33.8905	1045	12.4157	10.3109	30.3318	890.657	28.6838	-5.30975	33.9935	21.9447	1.06396	23.2136	1.06396	726	143	7	72.7755	361	27	332	27
2015	15-107_1	HN	114.708	33.6431	51	14.929	10.3157	29.0893	957.419	31.792	-3.67025	35.4622	25.187	2.74483	26.4827	2.74483	781	191	11	78.5627	401	46	398	46
2015	15-61_1	HillX	112.342	37.3641	765	10.2818	13.7915	33.1891	1046.82	29.168	-12.3863	41.5542	20.742	-3.34779	22.4157	-3.34779	439	114	3	105.106	281	12	274	12
2023	23-3-67_1	SD	117.168	37.1164	17	13.2802	10.239	26.4967	1080.95	31.0993	-7.54325	38.6425	25.9832	-0.768792	25.9832	-0.768792	602	199	4	120.456	415	15	415	15
2013	MMT-13-16_1	SD	120.04	36.2703	5	12.9544	8.18284	24.2472	965.83	28.7227	-5.02481	33.7475	24.1944	0.58174	24.1944	0.58174	694	172	10	92.9529	408	32	408	32
2023	23-1-8-2_1	SD	116.026	35.3781	41	13.9888	10.744	28.9362	1018.63	31.3918	-5.73825	37.13	26.1162	0.853625	26.1162	0.853625	651	188	9	101.134	397	30	397	30
2013	MMT-13-22_1	HillX	112.76	37.6928	827	9.46924	13.6967	32.5803	1062.53	28.644	-13.3958	42.0397	20.1512	-4.32125	21.8554	-4.32125	411	115	1	108.229	267	7	261	7
2013	MT-13-32_1	AH	115.676	33.9959	44	14.8613	10.4171	29.2063	966.389	31.6157	-4.0515	35.6672	25.2315	2.46062	26.4237	2.46062	784	212	13	87.9445	432	50	431	50
2023	W-139_1	HN	114.8	33.1808	40	15.0816	10.2156	28.9265	955.415	31.8562	-3.4595	35.3158	26.5998	2.93375	26.5998	2.93375	842	196	12	74.0727	418	53	418	53
2023	W-8_1	NX	105.75	37.46	1150	9.39923	13.7083	31.2629	1089.04	30.251	-13.5975	43.8485	20.604	-4.75388	22.196	-4.75388	228	61	1	96.5543	140	4	130	4
2015	15-5_1	HN	114.762	34.8297	66	14.3082	10.5888	29.138	987.165	31.5088	-4.8315	36.3403	24.7231	1.66212	26.1208	1.66212	642	171	8	92.4427	371	28	366	28
2023	23-2-54_1	SD	116.009	36.9542	31	13.1556	10.828	27.2253	1101.75	31.6252	-8.1465	39.7718	26.1181	-1.13446	26.1181	-1.13446	542	174	6	119.521	372	19	372	19
2023	23-2-8_1	HB	116.156	38.0375	16	12.996	11.3809	27.0079	1154.83	32.171	-9.968	42.139	26.6431	-1.67625	26.6431	-1.67625	407	133	3	127.336	298	13	298	13
2023	23-3-33_1	SD	119.172	36.6607	45	12.5047	10.7691	28.5916	1027.42	29.8232	-7.842	37.6652	24.5815	-0.821	24.5815	-0.821	704	211	8	106.362	443	27	443	27
2023	23-3-58_1	SD	118.002	37.7076	5	13.3003	10.8637	27.7377	1094.71	31.2665	-7.8995	39.166	26.0595	-1.00292	26.0595	-1.00292	577	194	6	120.458	397	19	397	19
2023	HZ2_1	ZJ	120.236	29.9686	7	16.3595	7.99854	25.2958	858.598	32.083	0.463	31.62	20.2107	7.70675	26.6535	5.53479	1336	195	42	43.3366	489	154	456	179
2013	13-42_1	BJ	116.413	39.9109	53	12.4347	11.2605	27.9641	1110.06	31.2797	-8.988	40.2677	25.4131	-1.88363	25.4131	-1.88363	569	204	4	136.139	433	13	433	13
2015	15-20_1	HN	111.207	34.7783	406	13.475	11.24	30.3127	967.671	30.9858	-6.0945	37.0802	23.6161	1.05196	25.0809	1.05196	585	124	6	77.6274	308	20	278	20
2015	15-51_1	HillX	111.526	36.0937	458	12.6401	12.0406	30.2462	1031	31.4858	-8.323	39.8088	23.3186	-0.6235	24.8847	-0.6235	507	123	4	93.0885	306	15	282	15
2016	16-5_1	SD	116.824	36.5035	60	13.3617	9.55317	25.6006	1058.37	30.6955	-6.62075	37.3162	25.8489	-0.35325	25.8489	-0.35325	663	212	4	115.639	442	17	442	17
2023	23-1-20_1	AH	115.557	33.2237	34	15.2037	10.0796	28.6668	952.838	31.7862	-3.375	35.1612	26.6638	3.04754	26.6638	3.04754	825	198	12	75.5729	415	54	415	54
2023	23-3-26_1	SD	118.69	35.5635	138	12.4439	10.4861	28.579	1017.32	29.0835	-7.60825	36.6917	24.3748	-0.818542	24.3748	-0.818542	827	261	9	110.396	538	32	538	32
2023	23-3-27_1	SD	118.711	35.6959	144	12.3043	10.7171	29.0766	1020.56	28.9637	-7.8945	36.8582	24.2054	-1.0405	24.2054	-1.0405	816	256	10	109.311	525	33	525	33
2023	W-140_1	HN	114.754	33.1624	41	15.1477	10.0323	28.7228	950.376	31.6895	-3.2385	34.928	26.5835	3.05621	26.5835	3.05621	872	198	13	72.0082	427	57	427	57
2023	23-2-49_1	HB	115.1	37.1683	31	13.3802	11.5447	28.2526	1105.04	32.5315	-8.33075	40.8622	26.3397	-1.03429	26.3397	-1.03429	512	160	3	119.521	348	12	348	12
2016	RMT-13-3_1	HN	114.526	35.581	60	14.0923	10.6764	28.6858	1008.76	31.612	-5.60625	37.2183	24.6078	1.10713	26.0799	1.10713	567	157	5	102.216	350	20	348	20
2023	W-127_1	LN	119.942	41.3072	250	8.4695	13.0579	29.0281	1218.73	28.4813	-16.5025	44.9837	22.5667	-7.40671	22.5667	-7.40671	493	156	2	120.5	348	7	348	7
2023	W-144_1	HN	114.904	33.2584	40	15.0811	10.1581	28.7925	956.268	31.8185	-3.462	35.2805	26.6004	2.91717	26.6004	2.91717	838	197	12	74.5891	417	53	417	53
2015	15-98_1	HillX	111.226	35.1475	409	12.5018	11.1291	30.0974	970.626	29.9023	-7.07475	36.977	22.6154	0.0379999	24.1072	0.0379999	569	123	5	80.7381	309	18	281	18
2023	23-1-55_1	HillX	110.448	35.1361	526	13.508	11.5559	30.4771	989.913	31.2725	-6.64425	37.9167	23.8285	0.802417	25.3372	0.802417	548	108	5	76.9008	289	17	255	17
2013	MMT-13-26_1	SX	108.207	34.2661	453	12.9317	9.70658	28.3613	916.281	29.6933	-4.5315	34.2248	22.6467	1.34887	24.1513	1.34887	638	113	5	72.4048	316	19	271	19
2013	MMT-13-15_1	SX	108.946	34.3473	380	13.4386	10.3112	28.46	962.57	31.2747	-4.95575	36.2305	23.6226	1.23446	25.2172	1.23446	619	112	6	70.411	305	23	269	23
2013	13-54_1	SD	119.65	36.764	47	12.5804	10.2242	27.7763	1014.31	29.5035	-7.3055	36.809	24.488	-0.542042	24.488	-0.542042	675	194	8	104.004	421	26	421	26
2021	21-20_1	JS	118.81	34.1175	5	14.2363	9.2389	26.9641	958.701	30.1833	-4.0805	34.2638	25.6917	2.00475	25.6917	2.00475	797	210	17	94.0949	482	60	482	60
2023	23-2-31_1	HillX	112.726	38.7309	816	9.1859	13.5597	31.5121	1103.71	28.7925	-14.2375	43.03	20.2097	-5.15992	21.9867	-5.15992	417	113	1	109.557	274	7	269	7
2023	23-2-46_1	HB	114.607	37.0836	50	13.5335	11.17	28.3521	1066.07	32.0375	-7.36	39.3975	24.4007	-0.279375	26.0898	-0.279375	531	166	2	116.319	350	10	348	10
2015	15-109_1	SX	110.099	34.5718	348	13.5916	10.7252	29.2964	970.174	31.1243	-5.485	36.6092	23.7981	1.21746	25.3198	1.21746	597	110	7	71.2048	297	23	262	23
2023	23-1-79_1	SD	116.56	36.513	29	13.2421	9.93917	26.1531	1067.13	30.9	-7.10375	38.0037	25.8888	-0.543542	25.8888	-0.543542	634	203	5	115.862	424	18	424	18
2023	23-3-17_1	JS	118.718	34.2272	6	14.0949	9.4475	27.2394	962.957	30.183	-4.50025	34.6833	25.595	1.79008	25.595	1.79008	795	211	16	95.7802	488	54	488	54
2023	W-24_1	GZ	106.35	26.2471	1026	14.3832	7.91496	30.9777	656.918	26.3948	0.84425	25.5505	20.7353	5.7115	21.9063	5.7115	1167	222	18	72.3748	577	61	557	61
2019	19-02_1	SD	116.236	36.8516	30	13.1869	10.5071	26.7434	1096.76	31.412	-7.8765	39.2885	26.1203	-1.00158	26.1203	-1.00158	564	183	6	119.896	387	18	387	18
2013	MT-13-13_1	SD	118.635	35.7962	144	12.5918	10.836	29.1724	1021.98	29.5308	-7.614	37.1447	24.5695	-0.732292	24.5695	-0.732292	800	254	9	110.681	520	32	520	32
2015	15-57_1	SD	118.906	35.6925	120	12.2946	10.3544	28.2589	1014.33	28.8312	-7.81	36.6413	24.1631	-0.9385	24.1631	-0.9385	814	252	9	108.667	521	31	521	31
2023	23-2-52_1	SD	115.723	36.8542	37	13.0718	11.1457	27.5208	1113.08	32.0185	-8.4805	40.499	26.239	-1.35942	26.239	-1.35942	500	160	6	121.651	347	21	347	21
2015	15-35_1	HN	116.082	34.2189	39	14.5889	10.1444	28.4031	989.551	31.4562	-4.2595	35.7157	26.487	1.96125	26.487	1.96125	724	200	12	92.6113	416	42	416	42
2015	15-44_1	SX	107.245	34.3689	635	12.6679	9.92623	28.3014	918.056	30.0392	-5.034	35.0732	22.4661	1.10637	23.9338	1.10637	674	126	4	77.5112	355	18	296	18
2021	21-28_1	JS	119.62	32.5207	5	15.2438	8.36477	25.5733	928.523	31.0735	-1.6355	32.709	26.4474	3.56283	26.4474	3.56283	972	211	29	67.1769	476	96	476	96
2023	23-3-43_1	SD	120.525	36.894	67	12.2002	8.70919	25.2841	984.217	28.236	-6.20925	34.4453	23.6912	-0.411458	23.6912	-0.411458	714	195	9	103.604	444	28	444	28
2013	MT-13-28_1	HN	114.099	35.4873	73	14.1918	10.7933	29.0333	996.328	31.6938	-5.482	37.1758	26.0607	1.40829	26.0607	1.40829	558	148	3	99.4834	339	15	339	15
2015	15-18_1	JS	119.041	33.6382	12	14.5719	8.83102	26.3318	948.963	30.4565	-3.081	33.5375	25.8864	2.49071	25.8864	2.49071	869	223	18	84.056	476	69	476	69
2021	21-30_1	JL	125.694	44.6312	178	4.93416	11.8361	23.2031	1475.58	26.7685	-24.2425	51.011	21.8181	-14.589	21.8181	-14.589	554	170	3	112.757	375	12	375	12
2023	23-2-17_1	HB	115.951	39.419	40	12.3948	11.8416	28.7469	1111.64	31.0417	-10.151	41.1927	25.3339	-2.03854	25.3339	-2.03854	578	221	2	148.125	465	9	465	9
2023	23-2-20_1	HB	115.418	39.3837	80	11.8089	11.9995	29.3815	1096.75	30.3365	-10.5037	40.8402	24.5276	-2.46921	24.5276	-2.46921	540	189	3	136.414	413	10	413	10
2023	23-2-57_1	SD	116.253	36.9329	29	13.1869	10.5071	26.7434	1096.76	31.412	-7.8765	39.2885	26.1203	-1.00158	26.1203	-1.00158	564	183	6	119.896	387	18	387	18
2023	W-76_1	JL	128.28	43.1749	630	3.06415	12.4967	26.0687	1318.7	24.4405	-23.4972	47.9378	18.2508	-14.3792	18.2508	-14.3792	632	154	5	99.0062	397	19	397	19
2015	15-1_1	HillX	111.762	36.5746	596	11.3687	12.5278	31.2382	1030.11	30.253	-9.851	40.104	21.9232	-1.95608	23.5132	-1.95608	478	119	3	99.51	300	12	281	12
2023	23-3-40_1	SD	119.944	37.0588	84	12.276	9.41267	26.2171	1009.81	29.122	-6.78075	35.9027	24.1515	-0.738208	24.1515	-0.738208	669	188	9	102.589	416	29	416	29
2023	23-1-62-2_1	HillX	112.179	35.6896	871	10.2771	11.0694	30.0714	968.97	27.5893	-9.22125	36.8105	20.3687	-2.24379	21.7528	-2.24379	572	139	4	92.5812	339	16	323	16
2023	WH2_1	AH	117.914	31.1514	5	16.3139	7.77867	24.7018	891.356	31.7372	0.247	31.4902	24.7035	5.12083	27.032	5.12083	1280	222	31	51.3925	522	129	514	129
2015	15-65_1	TJ	117.832	39.337	5	12.0166	11.1236	27.8739	1109.96	29.7787	-10.1283	39.907	24.8228	-2.45375	24.8228	-2.45375	582	197	4	131.432	431	14	431	14
2023	23-1-19_1	AH	115.601	33.2554	35	15.2037	10.0796	28.6668	952.838	31.7862	-3.375	35.1612	26.6638	3.04754	26.6638	3.04754	825	198	12	75.5729	415	54	415	54
2023	23-3-24_1	SD	118.7	34.9376	125	13.3222	9.83815	28.1726	980.119	29.4023	-5.51875	34.921	24.8427	0.665333	24.8427	0.665333	847	238	12	101.268	533	43	533	43
2013	MT-13-3_1	SX	109.036	32.6905	265	14.9877	9.24187	29.4703	824.978	30.4487	-0.91125	31.36	24.0016	4.54242	25.041	4.54242	914	163	10	67.2955	420	38	386	38
2023	SX13_1	ZJ	120.616	30.0164	12	16.8758	8.06023	25.3524	864.166	32.7427	0.95	31.7927	24.8429	8.26733	27.255	6.00904	1279	187	46	42.8483	467	156	451	183
2023	WH1_1	AH	117.914	31.1514	5	16.3139	7.77867	24.7018	891.356	31.7372	0.247	31.4902	24.7035	5.12083	27.032	5.12083	1280	222	31	51.3925	522	129	514	129
2015	15-4_1	SD	117.533	36.6855	114	13.3291	10.5764	27.8305	1055.86	30.831	-7.17175	38.0028	25.705	-0.4145	25.705	-0.4145	675	220	5	115.815	450	20	450	20
2015	15-58_1	SD	117.009	35.3089	98	13.7265	10.9743	29.8196	1009.16	30.755	-6.04725	36.8022	25.6474	0.644958	25.6474	0.644958	705	207	10	102.601	442	36	442	36
2023	GY3_1	GZ	104.629	25.5668	1852	14.3164	9.32242	40.2054	526.756	24.4093	1.22225	23.187	20.0614	7.13346	20.0614	7.13346	1184	238	16	82.9824	641	54	641	54
2023	SZ3_1	JS	120.718	31.3321	1	15.9874	6.46306	21.3169	879.55	30.8388	0.51975	30.319	26.5218	12.2733	26.5218	4.95971	1016	171	34	54.072	442	120	442	140
2015	15-110_1	SD	116.76	35.5044	40	13.7663	10.9846	29.324	1023.81	31.1978	-6.26175	37.4595	25.9177	0.559042	25.9177	0.559042	686	209	8	106.585	433	28	433	28
2015	15-47_1	SX	108.611	34.115	413	12.8402	9.69123	28.4111	909.841	29.5545	-4.55625	34.1108	22.4987	1.31758	23.9734	1.31758	639	111	5	69.9805	306	21	265	21
2015	15-99_1	SX	108.256	34.3148	475	12.9317	9.70658	28.3613	916.281	29.6933	-4.5315	34.2248	22.6467	1.34887	24.1513	1.34887	638	113	5	72.4048	316	19	271	19
2023	23-1-37_1	HN	113.118	33.6729	107	15.1183	10.4212	29.425	941.58	31.7892	-3.627	35.4162	24.8925	3.01463	26.4777	3.01463	750	162	10	73.8785	375	37	367	37
2023	23-2-23_1	HillX	114.377	39.3223	879	7.82664	12.9986	30.7671	1096.62	27.1475	-15.1007	42.2482	20.6428	-6.45754	20.6428	-6.45754	438	129	1	112.63	294	7	294	7
2023	23-3-56_1	SD	118.262	37.4959	11	13.4448	10.6591	27.5294	1083.97	31.189	-7.53	38.719	26.0971	-0.729083	26.0971	-0.729083	595	196	6	115.906	396	21	396	21
2013	MT-13-8_1	HN	114.784	32.9721	39	15.224	9.86235	28.4437	946.211	31.6543	-3.019	34.6733	26.6	3.1815	26.6	3.1815	903	200	14	69.8954	435	61	435	61
2023	SX14_1	ZJ	120.483	30.0886	6	16.4877	8.00894	25.2439	863.101	32.299	0.57275	31.7262	24.4575	7.84996	26.8531	5.62379	1312	189	45	42.7711	474	157	457	183
2015	15-123_1	SD	117.049	36.1933	153	11.7382	9.62106	26.4912	1021.51	28.7157	-7.60225	36.318	23.7655	-1.49642	23.7655	-1.49642	740	232	6	111.443	481	24	481	24
2023	23-1-69_1	HN	115.016	35.8468	56	13.7323	10.8729	28.6346	1033.4	31.705	-6.26625	37.9712	24.4546	0.408625	26.0184	0.408625	556	156	6	103.104	349	23	343	23
2023	23-3-53_1	SD	118.651	37.1176	7	13.5031	11.1461	28.4778	1071.48	31.389	-7.7505	39.1395	26.0732	-0.486458	26.0732	-0.486458	637	207	6	114.014	417	22	417	22
2013	MT-13-23_1	HN	114.347	33.6052	48	14.9172	10.4586	29.4274	958.912	31.7598	-3.78075	35.5405	25.1717	2.73683	26.5123	2.73683	781	185	12	76.8616	397	46	396	46
2015	15-80_1	SD	116.236	36.8516	30	13.1869	10.5071	26.7434	1096.76	31.412	-7.8765	39.2885	26.1203	-1.00158	26.1203	-1.00158	564	183	6	119.896	387	18	387	18
2021	21-22_1	HN	114.916	34.9284	70	14.194	10.5549	29.0579	991.628	31.3363	-4.98725	36.3235	24.658	1.45825	26.0398	1.45825	630	171	7	94.9331	371	27	365	27
2023	23-1-27_1	HN	114.407	33.2245	50	15.0253	10.1988	28.9583	952.238	31.6597	-3.55925	35.219	26.5175	2.904	26.5175	2.904	839	190	12	73.2428	415	51	415	51
2023	HZ8_1	ZJ	120.286	30.1708	13	16.6825	8.19677	25.6161	872.286	32.6172	0.61875	31.9985	24.7221	7.93213	27.1153	5.70554	1318	188	43	43.7416	475	153	466	180
2013	MT-13-10_1	JS	119.4	34.4272	1	13.7161	8.98283	26.4969	947.607	29.4312	-4.47025	33.9015	25.0484	1.69267	25.0484	1.69267	799	195	15	88.9975	465	54	465	54
2023	SZ2_1	JS	120.795	31.43	1	15.8378	6.31056	20.9424	880.015	30.596	0.463	30.133	26.353	12.1718	26.353	4.80079	980	160	33	54.6619	428	114	428	133
2015	15-117_1	HB	115.99	38.0469	19	13.0372	11.5449	27.4315	1148.41	32.193	-9.89325	42.0863	26.6038	-1.60075	26.6038	-1.60075	411	132	4	126.466	300	14	300	14
2023	23-1-49_1	SX	110.32	34.5081	530	13.5985	10.8571	29.508	974.597	31.199	-5.59475	36.7938	23.8222	1.13908	25.3447	1.13908	596	114	6	72.7291	300	21	267	21
2013	MMT-13-31_1	SD	118.177	36.1909	283	11.7183	11.016	29.2724	1025.84	28.969	-8.66375	37.6328	23.7227	-1.64825	23.7227	-1.64825	754	239	8	111.103	487	28	487	28
2023	W-7_1	NX	105.89	37.0464	1312	9.01391	13.6288	31.925	1054.99	29.1532	-13.5367	42.69	19.8767	-4.66754	21.4296	-4.66754	265	68	1	94.9204	161	4	148	4
2023	W-7-2_1	NX	105.89	37.0464	1312	9.01391	13.6288	31.925	1054.99	29.1532	-13.5367	42.69	19.8767	-4.66754	21.4296	-4.66754	265	68	1	94.9204	161	4	148	4
2023	W-l_1	JS	119.382	32.3329	5.74	15.6266	7.80904	24.1598	929.635	31.578	-0.7445	32.3225	26.8259	4.01971	26.8259	4.01971	1005	191	27	60.0393	464	101	464	101
2015	15-28_1	SX	108.947	34.6231	421	13.1553	10.4654	28.6146	968.604	31.1003	-5.47325	36.5735	23.4088	0.887917	25.0182	0.887917	633	117	6	73.2557	322	22	287	22
2023	W-105_1	HuB	113.097	30.6652	33	16.6089	8.13171	25.4619	892.307	31.8452	-0.0915	31.9367	25.2646	5.31437	27.3009	5.31437	1106	167	26	52.5767	473	100	437	100
2015	15-14_1	SX	109.517	34.5057	346	13.7394	10.9208	29.3987	975.508	31.6548	-5.4925	37.1473	24.0075	1.32033	25.5938	1.32033	583	98	6	69.1645	284	22	242	22
2023	23-1-51_1	SX	109.96	34.6732	338	13.986	11.5374	30.6129	984.509	31.812	-5.876	37.688	24.264	1.35158	25.795	1.35158	578	103	6	71.2938	290	22	251	22
2013	MMT-13-4_1	SD	117.141	36.1994	150	11.7382	9.62106	26.4912	1021.51	28.7157	-7.60225	36.318	23.7655	-1.49642	23.7655	-1.49642	740	232	6	111.443	481	24	481	24
2023	23-3-66_1	SD	117.185	37.2359	16	13.2184	10.528	26.9009	1090.9	31.222	-7.91425	39.1362	26.0153	-0.959583	26.0153	-0.959583	575	192	4	122.352	402	15	402	15
2023	23-3-60_1	SD	117.579	37.766	8	13.1898	10.9522	27.7274	1094.64	31.407	-8.0925	39.4995	26.005	-1.05683	26.005	-1.05683	558	193	4	125.328	395	15	395	15
2015	15-33_1	SX	109.778	34.5187	356	13.899	11.094	29.8961	972.763	31.6392	-5.46925	37.1085	24.1335	1.48771	25.6753	1.48771	588	101	6	69.3922	288	23	248	23
2013	MT-13-27_1	HN	113.593	33.8379	75	14.9314	10.6796	29.7288	955.404	31.8077	-4.11575	35.9235	26.4523	2.65917	26.4523	2.65917	729	166	10	78.5539	378	37	378	37
2023	W-11_1	HuB	112.121	30.2029	45	16.6274	7.78496	25.0393	863.039	31.5982	0.50725	31.091	24.9755	5.71375	26.9647	5.71375	1091	157	24	50.8123	443	92	429	92
2015	15-30_1	SD	117.45	36.2517	161	12.8748	10.5128	27.8808	1046.15	30.1432	-7.56275	37.706	25.1264	-0.748833	25.1264	-0.748833	716	228	6	112.212	466	23	466	23
2023	23-1-73_1	SD	115.798	36.1208	42	13.6015	10.9378	28.7079	1037.93	31.5233	-6.577	38.1003	25.9632	0.235667	25.9632	0.235667	575	173	6	106.133	361	22	361	22
2023	23-3-10_1	JS	117.544	34.455	61	14.2871	10.2911	28.6582	991.096	30.9268	-4.983	35.9098	26.0692	1.5275	26.0692	1.5275	684	181	13	95.4029	425	49	425	49
2023	23-3-21_1	JS	119.079	34.837	6	13.4602	9.15475	26.6718	968.721	29.2957	-5.028	34.3237	24.9446	1.06492	24.9446	1.06492	894	249	12	100.252	548	43	548	43
2023	W-117_1	GD	113.807	22.3998	0	22.7006	4.82024	25.218	535.279	31.5143	12.4	19.1143	28.5643	17.7333	28.5643	15.7405	1812	311	26	75.7377	902	91	902	99
2023	XT1_1	HuB	113.47	30.36	29	16.8366	8.14404	25.4593	891.685	32.1505	0.162	31.9885	25.489	5.54787	27.5345	5.54787	1171	185	29	52.4404	502	115	452	115
2013	13-39_1	SD	118.105	37.7053	6	13.3003	10.8637	27.7377	1094.71	31.2665	-7.8995	39.166	26.0595	-1.00292	26.0595	-1.00292	577	194	6	120.458	397	19	397	19
2023	23-2-30_1	HillX	112.717	38.7365	822	9.1859	13.5597	31.5121	1103.71	28.7925	-14.2375	43.03	20.2097	-5.15992	21.9867	-5.15992	417	113	1	109.557	274	7	269	7
2023	SX1_1	ZJ	120.194	29.71	12	16.7492	8.2171	25.8124	857.049	32.6348	0.80075	31.834	20.6075	8.09483	27.026	5.94413	1345	202	42	43.9725	502	154	464	180
2023	W-73_1	HLJ	126.583	45.3731	143.66	3.86557	12.2055	22.9325	1540.97	27.0982	-26.1252	53.2235	21.5194	-16.5672	21.5194	-16.5672	539	158	3	110.514	360	12	360	12
2023	W-90_1	HLJ	126.105	45.1039	138	4.66973	11.9508	23.0753	1499.72	27.1383	-24.6523	51.7905	21.9037	-15.064	21.9037	-15.064	539	163	3	112.01	363	11	363	11
2023	23-1-83_1	AH	116.983	33.6461	28	15.2789	10.0253	28.2934	987.846	31.8328	-3.60075	35.4335	27.1049	2.66458	27.1049	2.66458	710	183	18	84.0694	393	59	393	59
2023	SX4_1	ZJ	120.793	29.5828	19	16.5032	8.26648	26.1575	846.428	32.2817	0.679	31.6027	24.3029	8.0185	26.6466	5.851	1289	199	39	45.7284	490	142	460	164
2023	W-71_1	HLJ	132.048	47.2377	77.4	3.15807	10.7502	20.7499	1523.72	27.4268	-24.3818	51.8085	20.747	-16.877	20.747	-16.877	540	126	4	93.1583	322	18	322	18
2023	W-99_1	HLJ	128.471	45.5014	116.3	3.15611	12.8431	23.7875	1514.71	27.3587	-26.6325	53.9912	20.6302	-16.9101	20.6302	-16.9101	574	148	4	102.448	364	14	364	14
2023	23-3-1_1	SD	117.51	35.7695	160	12.9839	11.0179	29.7657	1022.9	29.9123	-7.10325	37.0155	24.8979	-0.385958	24.8979	-0.385958	745	229	9	107.206	477	32	477	32
2023	W-91_1	JL	124.385	45.1644	134	5.05692	11.495	22.4125	1485.07	28.3927	-22.8955	51.2882	22.2778	-14.3861	22.2778	-14.3861	456	150	2	118.696	319	8	319	8
2023	23-3-13_1	JS	117.76	33.9965	24	14.7829	9.87963	27.8002	979.239	31.33	-4.208	35.538	26.5009	2.246	26.5009	2.246	700	184	18	92.3473	423	60	423	60
2023	23-3-2_1	SD	117.257	35.6706	100	13.3368	10.8713	29.2775	1025.15	30.4405	-6.6915	37.132	25.355	-0.00616674	25.355	-0.00616674	721	225	8	108.516	462	29	462	29
2013	MT-13-33_1	HN	113.805	34.5032	156	14.2314	11.0532	30.1701	972.195	31.3725	-5.26375	36.6362	24.2934	1.70763	25.8107	1.70763	627	156	6	86.9109	348	24	342	24
2015	15-69_1	SD	115.93	35.4044	43	13.9374	10.728	28.9994	1015.8	31.258	-5.73575	36.9938	26.0365	0.84425	26.0365	0.84425	636	184	8	101.042	386	28	386	28
2023	23-2-33_1	HillX	112.679	38.0646	900	8.18507	13.7146	32.2832	1070.77	27.62	-14.862	42.482	18.9795	-5.70725	20.6724	-5.70725	401	114	1	112.303	266	5	263	5
2023	W-63_1	HLJ	129.413	44.5454	279	3.93657	12.3524	24.3169	1422.86	26.915	-23.8825	50.7975	20.4131	-14.8436	20.4131	-14.8436	565	130	3	98.3124	350	13	350	13
2023	W-97_1	FJ	118.978	26.9715	807	15.0658	8.20092	30.6525	667.464	28.169	1.4145	26.7545	18.0795	8.28088	22.9754	6.59704	1813	316	40	58.7685	794	149	671	195
2013	13-45_1	SD	115.947	35.322	43	14.0647	10.7405	29.128	1010.03	31.3002	-5.57325	36.8735	24.6994	1.04354	26.1019	1.04354	648	184	9	99.2383	390	30	389	30
2023	23-2-43_1	HB	114.273	36.5606	206	13.204	11.4762	29.3511	1049.67	31.687	-7.41275	39.0998	23.811	-0.386125	25.6044	-0.386125	576	167	3	111.519	377	12	366	12
2023	W-115_1	GX	107.99	23.1188	88	22.1744	7.85565	33.3223	592.279	32.7917	9.217	23.5747	28.6776	15.9347	28.6776	14.2978	1578	273	38	70.897	797	129	797	151
2023	W-130_1	LN	122.818	42.4188	103	7.66399	11.7844	25.666	1292.05	28.356	-17.5585	45.9145	22.7192	-9.14875	22.7192	-9.14875	536	152	2	108.527	351	8	351	8
2023	W-58_1	HN	113.644	33.468	87	15.0671	10.2371	29.1287	947.507	31.6205	-3.524	35.1445	26.4948	2.93654	26.4948	2.93654	813	175	12	72.391	401	47	401	47
2023	W-9_1	HuB	114.394	30.2339	9.5	17.0478	7.94448	24.7203	897.899	32.6603	0.52275	32.1375	25.6022	7.69708	27.8015	5.66925	1298	218	32	55.0587	569	132	498	136
2013	13-60_1	SD	118.549	36.5191	95	13.1141	11.2323	29.0212	1047.69	30.8528	-7.851	38.7038	24.1822	-0.576083	25.4213	-0.576083	703	227	7	112.639	456	26	452	26
2023	23-1-40_1	HN	112.277	34.0809	475	13.3815	10.9288	31.26	894.229	29.7052	-5.25575	34.961	22.6853	1.81854	24.153	1.81854	712	150	8	74.3705	363	30	337	30
2023	23-1-5_1	SD	116.067	35.6696	38	13.748	10.8353	28.7896	1029.27	31.3802	-6.256	37.6362	26.0097	0.493458	26.0097	0.493458	633	187	7	103.766	392	26	392	26
2013	13-37_1	HN	114.825	34.8622	73	14.2569	10.46	28.9481	987.097	31.35	-4.78375	36.1338	24.6678	1.60017	26.059	1.60017	626	169	7	94.4119	367	27	362	27
2023	23-3-15_1	JS	118.484	33.8303	16	14.5977	9.30417	27.0535	960.422	30.6873	-3.7045	34.3918	26.0877	9.61279	26.0877	2.35471	776	209	21	93.6119	465	68	465	71
2023	W-48_1	SC	104.235	31.0427	485	16.3218	7.895	28.2656	731.861	29.5257	1.59425	27.9315	24.1229	6.80979	24.8246	6.80979	938	226	7	97.4425	574	29	541	29
2023	23-3-37_1	SD	119.912	37.0123	83	12.276	9.41267	26.2171	1009.81	29.122	-6.78075	35.9027	24.1515	-0.738208	24.1515	-0.738208	669	188	9	102.589	416	29	416	29
2013	MT-13-6_1	SX	107.756	34.2804	488	12.6125	9.65323	28.366	902.013	29.2908	-4.74025	34.031	22.2159	1.21117	23.6468	1.21117	670	122	4	74.857	342	19	287	19
2023	23-1-54_1	SX	109.517	34.5057	346	13.7394	10.9208	29.3987	975.508	31.6548	-5.4925	37.1473	24.0075	1.32033	25.5938	1.32033	583	98	6	69.1645	284	22	242	22
2023	W-17_1	GS	106.561	35.3042	1465	8.02016	10.7103	30.4752	886.945	24.933	-10.2113	35.1442	17.4286	-3.31188	18.652	-3.31188	564	105	3	81.3543	306	14	271	14
2023	W-4-2_1	NX	106.03	38.26	1073	9.19734	12.9062	30.6032	1067.54	28.644	-13.5287	42.1727	20.1371	-4.73883	21.6376	-4.73883	199	53	1	94.4349	121	6	114	6
2015	15-72_1	HB	114.996	38.5222	57	12.9211	11.9058	29.0888	1094.1	31.5858	-9.3435	40.9293	25.7052	-1.26888	25.7052	-1.26888	453	142	2	125.493	326	10	326	10
2023	23-1-48_1	SX	110.409	34.0123	876	12.2398	10.5019	30.4444	903.239	28.734	-5.7615	34.4955	21.8481	0.733	23.167	0.733	700	138	7	72.9331	350	26	320	26
2023	23-1-75_1	SD	116.14	36.2227	39	13.4312	10.6141	27.9101	1050.89	31.2003	-6.8295	38.0298	25.91	-0.1195	25.91	-0.1195	598	184	6	109.677	386	21	386	21
2013	MT-13-9_1	JS	118.492	34.6012	55	13.8474	9.98631	28.293	980.881	30.1737	-5.12225	35.296	25.4687	1.21858	25.4687	1.21858	756	197	12	97.8325	480	47	480	47
2023	W-17-2_1	GS	106.561	35.3042	1465	8.02016	10.7103	30.4752	886.945	24.933	-10.2113	35.1442	17.4286	-3.31188	18.652	-3.31188	564	105	3	81.3543	306	14	271	14
2023	GY5_1	GZ	104.604	25.5213	1626	14.3164	9.32242	40.2054	526.756	24.4093	1.22225	23.187	20.0614	7.13346	20.0614	7.13346	1184	238	16	82.9824	641	54	641	54
2023	W-85_1	JL	124.85	43.2	232	5.0272	11.6622	23.1068	1416.59	27.5195	-22.9515	50.471	21.4578	-13.7329	21.4578	-13.7329	647	177	6	104.086	416	18	416	18
2023	23-3-34_1	SD	119.402	36.9259	11	12.6766	10.3785	27.7269	1031.15	29.981	-7.45	37.431	24.8034	-0.676458	24.8034	-0.676458	663	197	8	106.616	420	26	420	26
2023	23-3-62_1	SD	117.42	37.7549	10	13.1418	10.9164	27.5591	1098.12	31.4447	-8.16625	39.611	26.0205	-1.12113	26.0205	-1.12113	547	189	4	126.353	391	15	391	15
2013	13-36_1	HB	115.289	36.554	45	13.2155	11.3768	28.4449	1089.05	32.0682	-7.9275	39.9958	24.3082	-0.943625	26.1007	-0.943625	513	157	5	111.714	335	21	334	21
2023	23-3-6_1	SD	117.18	35.163	79	13.8099	10.7027	29.1828	1009.14	30.8767	-5.798	36.6747	25.7842	0.791958	25.7842	0.791958	700	204	10	102.793	444	36	444	36
2023	QZ1_1	ZJ	118.592	28.5939	148	17.1789	8.58615	27.7328	809.423	32.3795	1.41925	30.9603	21.0821	8.78542	26.7722	6.86946	1691	304	42	57.4431	771	174	558	223
2023	W-62_1	HLJ	129.499	44.565	282.1	3.93657	12.3524	24.3169	1422.86	26.915	-23.8825	50.7975	20.4131	-14.8436	20.4131	-14.8436	565	130	3	98.3124	350	13	350	13
2023	W-10_1	HuB	114.184	30.2856	3.4	17.0452	8.18854	25.4042	894.789	32.6792	0.44625	32.233	25.5882	7.70975	27.7811	5.72213	1287	215	32	54.7089	563	132	494	135
2023	23-1-58_1	HillX	111.323	35.4328	491	12.9367	11.8292	30.6655	1004.79	31.1408	-7.43425	38.575	23.3667	0.0452084	24.9403	0.0452084	552	125	4	85.1596	311	15	285	15
2023	W-45_1	SC	103.856	29.8904	390	17.0392	6.84763	25.9909	704.994	29.8235	3.47725	26.3462	24.6182	7.84304	25.262	7.84304	1377	331	13	96.2887	819	49	810	49
2015	15-121_1	SX	108.496	34.3055	431	13.0476	9.81627	28.5641	920.8	29.8477	-4.518	34.3657	22.8198	1.38583	24.2921	1.38583	627	109	5	71.1145	306	20	263	20
2023	W-47_1	SC	105.129	28.5629	328	17.6063	6.08215	23.7742	705.915	30.8493	5.26625	25.583	25.9613	8.43863	25.9613	8.43863	1106	190	21	70.8804	539	68	539	68
2023	23-1-10_1	SD	116.149	34.7361	41	14.3649	10.39	28.8092	998.231	31.3045	-4.76025	36.0648	26.2884	1.53242	26.2884	1.53242	689	192	11	95.7058	405	38	405	38
2023	23-3-25_1	SD	118.661	35.5039	121	12.5419	10.6676	28.8901	1020.22	29.3885	-7.53625	36.9248	24.5278	-0.734958	24.5278	-0.734958	808	254	8	110.128	526	31	526	31
2023	W-75_1	HLJ	126.531	45.4229	133.7	3.86557	12.2055	22.9325	1540.97	27.0982	-26.1252	53.2235	21.5194	-16.5672	21.5194	-16.5672	539	158	3	110.514	360	12	360	12
2023	W-20_1	GS	107.312	35.175	1332.2	9.66744	10.5682	29.3021	926.607	27.1182	-8.948	36.0662	19.4059	-2.16629	20.8075	-2.16629	582	108	4	80.1187	316	15	272	15
2023	W-67_1	HLJ	127.094	46.8212	166.1	2.98119	11.4391	21.4862	1564.04	26.935	-26.3043	53.2393	20.9615	-17.6846	20.9615	-17.6846	531	152	3	110.955	355	12	355	12
2023	YZGJ3_1	JS	119.404	31.8496	2	15.5095	7.94617	24.4627	924.967	31.4045	-1.07825	32.4827	26.6876	3.93733	26.6876	3.93733	1022	168	28	54.5776	447	110	447	110
2023	W-87_1	JL	122.486	45.1944	155	5.92324	12.6929	25.6439	1399.67	28.7558	-20.741	49.4967	22.3095	-12.1502	22.3095	-12.1502	414	138	1	123.766	303	5	303	5
2015	15-115_1	HB	116.66	38.7109	5	12.8876	11.6279	28.4173	1119.48	31.36	-9.5585	40.9185	25.8654	-1.62329	25.8654	-1.62329	487	175	3	137.625	373	14	373	14
2023	W-104_1	HuN	112.483	28.7023	27	17.3678	7.05898	22.828	857.546	32.8195	1.897	30.9225	21.6047	8.60375	27.7156	6.58683	1318	194	45	46.1937	553	174	425	175
2023	23-2-36_1	HillX	112.992	37.0834	1043	9.11194	13.2948	32.5505	1033.05	27.8368	-13.0068	40.8435	19.5929	-4.30646	21.2192	-4.30646	556	150	4	104.22	353	16	345	16
2023	23-3-65_1	SD	117.143	37.4741	13	13.1398	10.6683	27.0334	1098.33	31.3155	-8.14775	39.4632	26.0309	-1.08692	26.0309	-1.08692	531	177	3	125.468	380	13	380	13
2015	15-64_1	HN	113.593	33.8379	75	14.9314	10.6796	29.7288	955.404	31.8077	-4.11575	35.9235	26.4523	2.65917	26.4523	2.65917	729	166	10	78.5539	378	37	378	37
2023	W-129_1	LN	122.496	42.5457	124	7.34503	12.0841	25.89	1310.21	28.6115	-18.0635	46.675	22.6734	-9.65042	22.6734	-9.65042	505	148	2	110.123	334	7	334	7
2023	23-2-31-2_1	HillX	112.726	38.7309	816	9.1859	13.5597	31.5121	1103.71	28.7925	-14.2375	43.03	20.2097	-5.15992	21.9867	-5.15992	417	113	1	109.557	274	7	269	7
2023	W-98_1	HLJ	128.514	45.4757	152.7	3.10943	12.5608	23.8386	1477.87	26.944	-25.747	52.691	20.1963	-16.3932	20.1963	-16.3932	582	147	4	101.382	368	15	368	15
2023	SX9_1	ZJ	120.067	30.8328	3	15.9903	7.38427	23.6044	878.062	31.429	0.1455	31.2835	26.5483	11.9468	26.5483	4.95271	1232	199	41	52.089	503	133	503	169
2023	W-4_1	NX	106.03	38.26	1073	9.19734	12.9062	30.6032	1067.54	28.644	-13.5287	42.1727	20.1371	-4.73883	21.6376	-4.73883	199	53	1	94.4349	121	6	114	6
2023	W-79_1	JL	126.332	43.4433	479	3.37136	12.0064	23.6964	1413.93	24.921	-25.7465	50.6675	19.5695	-15.6105	19.5695	-15.6105	713	196	6	102.917	456	22	456	22
2023	W-81_1	JL	124.49	43.3213	182	6.33855	11.6909	24.2574	1363.01	27.8978	-20.2975	48.1953	22.1528	-11.5703	22.1528	-11.5703	618	175	5	106.3	402	17	402	17
2023	DZ2-1_1	HaiN	109.5	19.58	55	24.0957	7.5161	41.8993	389.271	32.3558	14.4172	17.9385	27.6591	18.7743	28.2108	18.7743	1708	291	17	76.7253	832	67	747	67
2023	SZHS1_1	AH	117.901	33.3904	20	15.1701	9.85879	28.1069	965.285	31.498	-3.578	35.076	26.7483	2.85325	26.7483	2.85325	763	201	23	86.1814	433	72	433	72
2023	23-3-47_1	SD	119.759	36.4686	14	12.6997	9.41685	26.5323	993.032	29.0382	-6.45375	35.492	24.3419	-0.103167	24.3419	-0.103167	704	192	9	99.759	430	29	430	29
2023	W-64_1	HLJ	129.437	44.5422	267.9	3.93657	12.3524	24.3169	1422.86	26.915	-23.8825	50.7975	20.4131	-14.8436	20.4131	-14.8436	565	130	3	98.3124	350	13	350	13
2023	W-50_1	SC	105.623	30.7715	349	16.991	6.71417	24.3397	748.409	30.9928	3.4075	27.5853	25.2213	7.3715	25.9148	7.3715	1035	224	11	86.7256	573	35	555	35
2023	W-78_1	JL	124.67	45.2211	129	4.77364	11.3699	22.0842	1495.96	28.0515	-23.4325	51.484	22.0849	-14.8679	22.0849	-14.8679	462	151	2	118.565	323	8	323	8
2023	LS1_1	HaiN	110.04	18.52	7	24.67	6.94198	45.6447	305.619	31.4679	16.2592	15.2087	26.456	21.3891	27.7958	20.4162	1578	284	23	74.2163	782	76	606	85
2023	W-69_1	HLJ	131.996	47.198	74.1	3.18122	10.6345	20.5604	1522.22	27.484	-24.239	51.723	20.7688	-16.8236	20.7688	-16.8236	541	126	4	92.9321	322	18	322	18
2023	DZ1_1	HaiN	109.36	19.74	8	24.4448	7.26637	40.0908	409.772	32.8406	14.7158	18.1248	28.2895	18.9273	28.8474	18.9273	1601	283	15	76.8182	781	62	729	62
2023	W-84_1	JL	126.2	44.5834	159	4.29473	11.8706	23.0441	1480.27	25.988	-25.5245	51.5125	21.1909	-15.5055	21.1909	-15.5055	575	171	3	110.045	382	13	382	13
2023	SX8_1	ZJ	120.569	30.1078	11	16.8758	8.06023	25.3524	864.166	32.7427	0.95	31.7927	24.8429	8.26733	27.255	6.00904	1279	187	46	42.8483	467	156	451	183
2023	W-92_1	JL	123.596	44.5213	143	6.12559	12.0463	24.0845	1427.84	28.8682	-21.1485	50.0168	22.757	-12.434	22.757	-12.434	438	147	1	121.924	312	5	312	5
2023	W-113_1	GX	107.174	22.2419	198	22.2441	7.67254	35.2943	532.555	31.9825	10.2437	21.7388	27.9898	16.399	27.9898	15.0919	1482	266	26	77.1864	784	94	784	99
2023	W-116_1	GX	108.155	22.99	107	21.988	7.57465	32.4538	592.388	32.5635	9.22375	23.3397	28.4809	15.7442	28.4809	14.1023	1511	255	34	69.7074	750	122	750	137
2023	W-60_1	SD	115.62	36.1233	44	13.5717	11.1777	29.109	1038.75	31.6012	-6.79825	38.3995	24.3943	0.1795	25.9519	0.1795	558	168	6	105.891	350	22	348	22
2023	SZ1_1	JS	120.726	31.3241	6	15.9874	6.46306	21.3169	879.55	30.8388	0.51975	30.319	26.5218	12.2733	26.5218	4.95971	1016	171	34	54.072	442	120	442	140
2013	MT-13-31_1	HB	114.522	38.0483	78	13.4388	11.449	28.4813	1082.84	32.1485	-8.05	40.1985	26.107	-0.611542	26.107	-0.611542	492	143	4	116.638	333	15	333	15
2023	W-19_1	GS	106.592	35.2216	1470.6	8.02016	10.7103	30.4752	886.945	24.933	-10.2113	35.1442	17.4286	-3.31188	18.652	-3.31188	564	105	3	81.3543	306	14	271	14
2023	23-2-10_1	HB	116.134	38.1961	16	12.9995	11.4729	27.2179	1154.96	32.148	-10.004	42.152	26.6187	-1.67796	26.6187	-1.67796	405	133	3	129.139	300	14	300	14
2023	W-13_1	GS	103.41	36.69	1559.7	5.65564	12.7889	32.3995	961.008	24.3662	-15.1062	39.4725	15.7955	-6.76438	17.0409	-6.76438	316	72	1	93.8643	184	5	182	5
2023	W-74_1	HLJ	126.975	45.5414	143	3.89084	12.0264	22.7104	1525.84	27.3662	-25.5893	52.9555	21.4684	-16.2884	21.4684	-16.2884	541	155	3	109.264	359	13	359	13
2023	YZ3_1	HaiN	109.718	18.2989	14	25.3519	6.57306	46.0405	285.64	31.6961	17.4194	14.2767	26.9843	22.2845	28.3	21.3981	1464	292	23	77.5243	762	75	407	92
2023	QZ3_1	ZJ	119.034	29.1373	119	17.5045	8.41946	26.8048	836.361	33.1178	1.7075	31.4103	21.467	8.933	27.4791	6.92883	1530	265	38	52.0693	648	162	516	200
2023	23-3-42_1	SD	120.441	37.3611	69	11.8675	8.93833	25.4474	1002.83	28.5982	-6.5265	35.1247	23.6361	-1.0205	23.6361	-1.0205	648	180	9	102.351	401	29	401	29
2023	W-22_1	YN	103.571	25.4098	2005.96	13.8032	10.7784	47.2203	459.677	23.3625	0.53675	22.8257	18.668	7.57671	18.668	7.57671	960	182	12	84.0562	528	41	528	41
2023	YZ6_1	HaiN	109.2	18.38	33	24.7572	6.93596	46.0869	303.056	31.397	16.3472	15.0497	26.4867	21.4449	27.9198	20.5983	1410	276	22	77.1448	738	75	392	87
2023	W-65_1	HLJ	123.694	47.2725	305	3.85624	11.8045	22.6846	1512.81	27.518	-24.5195	52.0375	21.4084	-15.9255	21.4084	-15.9255	418	135	1	119.227	294	6	294	6
2023	YC1_1	JS	119.793	33.4761	4	14.5295	8.40596	25.7429	928.02	30.0942	-2.55925	32.6535	25.6751	2.82483	25.6751	2.82483	881	214	29	77.2274	467	87	467	87
2023	W-125_1	GD	113.349	23.4809	25	21.6449	7.89419	32.8131	594.535	32.5525	8.4945	24.058	27.132	15.4489	28.1713	13.7816	1691	279	33	65.6546	764	114	717	156
2023	W-107_1	GX	107.312	22.4205	109	22.4316	7.66369	35.0693	539.716	32.2837	10.4307	21.853	28.2627	16.5699	28.2627	15.1813	1478	262	26	76.5388	778	97	778	100
2013	MMT-13-10_1	HillX	111.013	35.0327	375	14.0626	11.678	30.3958	1008.8	32.06	-6.35975	38.4198	24.5042	1.10775	26.0994	1.10775	555	118	6	78.4504	296	19	265	19
2023	TL1_1	LN	123.73	42.22	60	7.62283	11.5959	24.6605	1309.99	28.2545	-18.7675	47.022	22.7767	-9.65287	22.7767	-9.65287	643	168	5	102.54	405	18	405	18
2023	23-1-84_1	JX	115.476	28.3991	37	17.7936	8.02725	25.1792	870.484	33.6055	1.725	31.8805	21.9948	8.83062	28.1303	6.78004	1555	274	41	58.6179	724	165	529	199
2023	23-1-11_1	AH	116.335	34.5353	53	14.4177	10.2146	28.6658	992.653	31.0815	-4.55175	35.6333	26.2545	1.63142	26.2545	1.63142	690	192	12	95.5307	408	40	408	40
2023	DF1_1	HaiN	108.69	19.12	20	24.9705	7.13682	41.7664	374.245	32.4178	15.3303	17.0875	27.1957	19.8596	28.9084	19.8596	1121	213	10	82.3733	579	38	515	38
2023	W-102_1	HaiN	110.37	19.859	39	24.2849	6.88642	38.268	406.977	32.5887	14.5935	17.9952	28.0632	18.6679	28.5468	18.6679	1726	272	24	68.9267	771	93	769	93
2023	23-2-13_1	HB	114.997	38.1867	44	13.024	11.6573	28.4546	1095.58	31.9175	-9.05075	40.9683	25.8958	-1.15242	25.8958	-1.15242	434	137	3	124.962	314	11	314	11
2023	W-100-2_1	HLJ	128.476	45.491	114.9	3.33606	12.6862	23.8607	1492.24	27.3088	-25.859	53.1677	20.5888	-16.3793	20.5888	-16.3793	578	147	4	101.439	365	15	365	15
2023	W-110_1	GX	109.541	24.005	91	20.5321	7.54373	29.7012	668.974	32.2905	6.89175	25.3988	26.7471	13.5787	27.9721	11.752	1507	290	36	66.359	724	133	607	187
2023	W-16-2_1	GS	105.173	34.4546	1264.7	6.59084	9.68731	30.0184	813.325	22.085	-10.1862	32.2712	15.2707	-3.87733	16.3468	-3.87733	647	117	4	79.7951	330	16	312	16
2013	MT-13-19_1	HN	112.459	34.6243	144	14.9031	10.4144	29.0454	952.911	31.9583	-3.89725	35.8555	24.6405	2.657	26.3644	2.657	619	146	6	81.8029	339	24	311	24
2023	W-66_1	HLJ	123.437	46.456	163	5.06956	11.859	23.3369	1470.03	28.4233	-22.3935	50.8167	22.1943	-14.0224	22.1943	-14.0224	398	132	1	122.894	289	5	289	5
2023	AHCZ2_1	AH	117.7	32.53	75	15.2427	8.94777	26.8639	933.61	30.9552	-2.3525	33.3078	26.3841	3.36996	26.3841	3.36996	896	196	25	66.6042	438	87	438	87
2021	21-8_1	SD	117.999	35.6524	211	11.8991	10.2493	28.4575	999.583	28.5487	-7.46725	36.016	23.6328	-1.08896	23.6328	-1.08896	772	236	8	108.06	500	32	500	32
2023	W-70_1	HLJ	127.048	46.8451	170.9	2.69514	11.1101	20.8477	1568.59	26.7727	-26.519	53.2917	20.7241	-18.0638	20.7241	-18.0638	530	152	3	110.918	354	12	354	12
2023	W-132_1	LN	122.207	42.6174	135	7.4228	12.1511	25.994	1310.57	28.7353	-18.0105	46.7458	22.7391	-9.59704	22.7391	-9.59704	494	146	2	110.455	328	7	328	7
2013	MMT-13-29_1	HN	113.019	33.2605	152	15.0281	10.2302	29.5843	931.89	31.0828	-3.497	34.5798	24.7877	3.05362	26.2107	3.05362	848	170	14	67.9197	401	50	395	50
2023	23-3-68_1	SD	117.147	37.0064	20	13.1906	10.145	26.152	1085.93	31.1073	-7.68525	38.7925	25.9787	-0.900042	25.9787	-0.900042	591	195	3	121.706	411	14	411	14
2023	23-3-35_1	SD	119.911	36.7735	40	12.4788	9.47062	26.6321	998.122	28.9212	-6.63975	35.561	24.174	-0.377875	24.174	-0.377875	685	188	9	100.784	421	29	421	29
2023	23-1-62_1	HillX	112.179	35.6896	871	10.2771	11.0694	30.0714	968.97	27.5893	-9.22125	36.8105	20.3687	-2.24379	21.7528	-2.24379	572	139	4	92.5812	339	16	323	16
2023	23-3-49_1	SD	119.406	36.8143	9	12.5976	10.3878	27.8639	1026.38	29.7655	-7.515	37.2805	24.641	-0.7165	24.641	-0.7165	684	200	9	104.558	427	29	427	29
2023	23-2-47_1	HB	114.679	37.1267	46	13.3455	11.2653	28.1582	1082.75	32.186	-7.82125	40.0073	26.152	-0.6925	26.152	-0.6925	524	168	2	117.518	346	10	346	10
2013	MMT-13-20_1	SD	117.072	36.6857	37	13.627	9.4759	25.2092	1069.7	31.1365	-6.4525	37.589	26.1974	-0.264208	26.1974	-0.264208	688	222	5	116.076	459	19	459	19
2023	23-3-59_1	SD	117.734	37.7065	4	13.2361	11.0498	27.9614	1094.71	31.3592	-8.15875	39.518	26.0103	-1.055	26.0103	-1.055	566	193	5	122.713	395	18	395	18
2023	W-45-4_1	SC	103.856	29.8904	390	17.0392	6.84763	25.9909	704.994	29.8235	3.47725	26.3462	24.6182	7.84304	25.262	7.84304	1377	331	13	96.2887	819	49	810	49
2023	W-112_1	GX	107.86	22.524	103	22.083	7.47483	33.077	571.994	32.21	9.61175	22.5982	28.31	15.9764	28.31	14.4211	1584	281	31	75.0299	825	113	825	118
2023	W-21_1	SD	115.602	36.0908	39	13.5717	11.1777	29.109	1038.75	31.6012	-6.79825	38.3995	24.3943	0.1795	25.9519	0.1795	558	168	6	105.891	350	22	348	22
2023	YZ2_1	HaiN	109.155	18.3445	4	25.043	7.09298	46.1658	310.067	31.8309	16.4668	15.3641	26.8123	21.6404	28.2889	20.7916	1371	275	22	77.6526	722	75	370	88
2023	WN2_1	HaiN	110.49	18.97	14	24.9991	6.89042	43.1048	336.634	32.2495	16.2642	15.9853	27.0242	21.388	28.4812	20.3298	1660	283	25	71.9498	787	82	672	92
2023	W-111_1	GX	109.26	23.8411	88	20.7014	7.61402	30.1569	662.278	32.308	7.06	25.248	26.8919	13.79	28.043	11.9798	1503	274	36	65.1601	717	132	627	193
2023	W-123_1	GD	113.968	23.1885	11	21.5863	7.48352	32.5275	570.447	31.9578	8.951	23.0068	26.847	15.6758	27.8483	14.0484	1757	289	35	66.4382	792	118	786	157
2023	23-2-24_1	HillX	114.243	39.4495	945	6.7034	13.4722	30.9033	1123.86	26.6045	-16.9902	43.5947	19.8132	-7.93054	19.8132	-7.93054	435	124	2	106.919	283	11	283	11
2023	W-122_1	GD	113.341	23.4776	31	21.6449	7.89419	32.8131	594.535	32.5525	8.4945	24.058	27.132	15.4489	28.1713	13.7816	1691	279	33	65.6546	764	114	717	156
2023	W-126_1	GD	113.276	23.3024	2	22.1122	7.5364	32.3589	582.514	32.671	9.381	23.29	27.4699	16.0597	28.4699	14.3961	1656	271	34	65.1467	751	115	700	148
2023	23-1-57_1	HillX	111.231	35.3629	470	12.9367	11.8292	30.6655	1004.79	31.1408	-7.43425	38.575	23.3667	0.0452084	24.9403	0.0452084	552	125	4	85.1596	311	15	285	15
2023	W-57_1	HN	113.596	33.4715	92	15.0671	10.2371	29.1287	947.507	31.6205	-3.524	35.1445	26.4948	2.93654	26.4948	2.93654	813	175	12	72.391	401	47	401	47
2023	MSBK_1	MSBK	33.65	-25.0494	6	23.2584	11.6013	59.5782	279.777	31.881	12.4086	19.4723	26.3184	22.0025	26.3748	19.4897	1023	153	31	47.1921	413	123	413	136
2023	23-2-22_1	HB	114.641	39.3474	874	6.63873	13.5294	31.566	1101.15	26.0632	-16.7975	42.8607	19.5087	-7.67213	19.5087	-7.67213	458	133	2	109.302	303	10	303	10
2023	W-119_1	GD	113.783	23.4256	14	21.3327	7.64879	32.332	585.874	32.0003	8.34325	23.657	26.756	15.2025	27.7798	13.5931	1725	287	34	65.8743	777	115	741	159
2023	23-2-14_1	HB	116.269	39.1969	14	12.4132	11.7327	28.6348	1112.04	30.8892	-10.0843	40.9735	25.3657	-2.01858	25.3657	-2.01858	537	207	2	148.62	430	10	430	10
2023	W-124_1	GD	113.985	23.1965	9	21.5863	7.48352	32.5275	570.447	31.9578	8.951	23.0068	26.847	15.6758	27.8483	14.0484	1757	289	35	66.4382	792	118	786	157
2023	23-1-64-2_1	HillX	113.18	35.8615	1080	8.64217	11.9661	31.8204	979.501	25.922	-11.6833	37.6053	18.6294	-4.072	20.205	-4.072	648	164	6	94.5327	382	22	380	22
2023	W-45-3_1	SC	103.856	29.8904	390	17.0392	6.84763	25.9909	704.994	29.8235	3.47725	26.3462	24.6182	7.84304	25.262	7.84304	1377	331	13	96.2887	819	49	810	49
2016	16-10_1	SD	117.533	36.6855	114	13.3291	10.5764	27.8305	1055.86	30.831	-7.17175	38.0028	25.705	-0.4145	25.705	-0.4145	675	220	5	115.815	450	20	450	20
2013	MMT-13-17_1	SD	117.59	36.8359	214	13.5564	10.5744	27.5436	1066.53	31.1562	-7.23525	38.3915	26.0318	-0.357208	26.0318	-0.357208	640	210	5	116.652	429	19	429	19
2021	21-1_1	SD	117.984	35.5672	231	11.8991	10.2493	28.4575	999.583	28.5487	-7.46725	36.016	23.6328	-1.08896	23.6328	-1.08896	772	236	8	108.06	500	32	500	32
2023	23-2-27_1	HillX	113.778	39.3024	1169	5.27756	13.7326	31.6642	1107.92	25.2703	-18.0993	43.3695	18.3051	-9.03608	18.3051	-9.03608	457	129	3	105.046	293	14	293	14
2023	QY1_1	HaiN	109.49	18.33	34	25.7131	6.94193	47.757	285.254	32.1258	17.5898	14.5359	27.3372	22.6258	28.6736	21.7805	1423	291	22	78.0914	745	75	381	92
2013	MT-13-21_1	HB	114.853	38.0278	58	13.1701	11.542	28.3083	1093.74	32.086	-8.6865	40.7725	26.0174	-0.981542	26.0174	-0.981542	433	137	3	124.186	313	12	313	12
2023	W-114_1	GX	108.127	22.9847	93	21.988	7.57465	32.4538	592.388	32.5635	9.22375	23.3397	28.4809	15.7442	28.4809	14.1023	1511	255	34	69.7074	750	122	750	137
2023	23-2-42_1	HB	114.123	36.5431	268	13.0106	11.7133	29.7895	1048.22	31.6465	-7.67375	39.3203	23.5012	-0.6075	25.3854	-0.6075	587	170	3	109.593	382	14	366	14
2015	15-10_1	SD	116.441	37.1712	24	13.0875	10.2589	26.0101	1107.6	31.3827	-8.05925	39.442	26.193	-1.18267	26.193	-1.18267	540	180	4	124.278	381	14	381	14
2013	MMT-13-7_1	HN	114.099	35.4873	73	14.1918	10.7933	29.0333	996.328	31.6938	-5.482	37.1758	26.0607	1.40829	26.0607	1.40829	558	148	3	99.4834	339	15	339	15
2023	23-1-67_1	HN	114.321	35.612	71	14.1433	10.6697	28.7586	999.864	31.669	-5.432	37.101	24.5709	1.31992	26.0358	1.31992	553	151	3	102.322	341	16	340	16
2013	MMT-13-27_1	HN	114.646	35.3627	65	14.0489	10.6962	28.8258	1002.16	31.5343	-5.57225	37.1065	24.5334	1.177	25.9966	1.177	572	157	5	100.038	348	20	346	20
2013	13-53_1	HB	117.012	39.7679	18	11.799	11.6399	28.3555	1117.02	30.2605	-10.7893	41.0498	24.8136	-2.69375	24.8136	-2.69375	543	206	2	141.022	420	11	420	11
2023	W-56_1	HN	113.594	33.4647	94	15.0671	10.2371	29.1287	947.507	31.6205	-3.524	35.1445	26.4948	2.93654	26.4948	2.93654	813	175	12	72.391	401	47	401	47
2023	W-95_1	FJ	119.036	26.2856	527	18.0732	7.40181	28.8067	662.58	30.9608	5.266	25.6948	20.6572	11.7482	25.9362	9.82692	1508	275	37	59.7429	666	125	565	171
2023	23-1-63_1	HillX	112.34	35.6081	721	11.6461	11.2409	30.3145	977.164	29.0168	-8.06425	37.081	21.7151	-0.988083	23.209	-0.988083	574	141	5	90.9775	336	18	320	18
2023	23-1-33_1	HN	113.61	33.505	75	14.9972	10.3315	29.0881	953.404	31.853	-3.665	35.518	26.5213	2.80725	26.5213	2.80725	785	172	11	74.3775	394	43	394	43
2013	MMT-13-9_1	SD	120.454	36.3947	22	12.8077	8.30631	24.506	970.265	28.555	-5.34	33.895	24.0864	0.343125	24.0864	0.343125	698	173	10	94.0336	413	32	413	32
2015	15-111_1	SD	116.578	35.9553	55	13.5091	10.7691	28.5342	1036.77	31.1122	-6.629	37.7412	25.7817	0.0812084	25.7817	0.0812084	674	207	7	108.167	429	24	429	24
2021	21-25_1	JS	118.855	34.5483	14	13.6253	9.32094	26.9039	966.429	29.6408	-5.0045	34.6453	25.192	1.28175	25.192	1.28175	845	232	13	98.7978	522	46	522	46
2015	15-116_1	HB	115.982	39.4911	38	12.3948	11.8416	28.7469	1111.64	31.0417	-10.151	41.1927	25.3339	-2.03854	25.3339	-2.03854	578	221	2	148.125	465	9	465	9
2023	23-2-12_1	HB	116.086	38.9854	13	12.7929	11.3894	27.7686	1120.38	31.3078	-9.7075	41.0153	25.8515	-1.68579	25.8515	-1.68579	484	172	3	140.229	372	12	372	12
2013	MMT-13-8_1	HN	114.558	35.6819	58	14.01	10.6946	28.5712	1013.85	31.6675	-5.76375	37.4313	24.5492	0.947042	26.0458	0.947042	557	156	4	104.169	349	19	345	19
2013	MMT-13-33_1	HB	115.224	37.9493	36	13.2555	11.3744	27.9116	1103.43	32.1527	-8.59875	40.7515	26.2597	-0.99575	26.2597	-0.99575	424	138	4	126.922	312	13	312	13
2013	MMT-13-25_1	SD	117.238	37.7359	11	13.1163	10.8197	27.3874	1098.23	31.2985	-8.20775	39.5062	25.9777	-1.1475	25.9777	-1.1475	527	182	4	127.931	380	14	380	14
2023	23-2-21_1	HB	114.865	39.3559	800	8.08359	12.772	30.4161	1101.37	27.2318	-14.7592	41.991	20.9235	-6.25183	20.9235	-6.25183	468	142	2	116.375	323	8	323	8
2013	MMT-13-21_1	HillX	110.455	34.8728	347	13.7367	11.4653	30.4168	986.776	31.4743	-6.21975	37.694	24.0257	1.10158	25.563	1.10158	562	109	5	74.8104	290	19	257	19
2013	13-66_1	HB	116.846	38.3102	11	13.1083	11.0874	27.9369	1104.75	31.2413	-8.446	39.6873	25.9675	-1.2345	25.9675	-1.2345	492	173	4	132.558	366	14	366	14
2023	23-1-50_1	SX	110.108	34.58	342	13.5916	10.7252	29.2964	970.174	31.1243	-5.485	36.6092	23.7981	1.21746	25.3198	1.21746	597	110	7	71.2048	297	23	262	23
2023	23-1-74_1	SD	115.798	36.1208	42	13.6015	10.9378	28.7079	1037.93	31.5233	-6.577	38.1003	25.9632	0.235667	25.9632	0.235667	575	173	6	106.133	361	22	361	22
2015	15-85_1	HB	117.012	39.7679	18	11.799	11.6399	28.3555	1117.02	30.2605	-10.7893	41.0498	24.8136	-2.69375	24.8136	-2.69375	543	206	2	141.022	420	11	420	11
2023	YZ1_1	HaiN	109.175	18.3622	6	24.7572	6.93596	46.0869	303.056	31.397	16.3472	15.0497	26.4867	21.4449	27.9198	20.5983	1410	276	22	77.1448	738	75	392	87
2023	HNDF1_1	HaiN	108.71	18.87	19	25.0138	7.17823	42.4779	362.336	32.4357	15.537	16.8988	27.1049	20.072	28.8423	20.072	1147	205	12	80.4418	600	46	490	46
2023	YZ4_1	HaiN	109.14	18.34	1	25.043	7.09298	46.1658	310.067	31.8309	16.4668	15.3641	26.8123	21.6404	28.2889	20.7916	1371	275	22	77.6526	722	75	370	88
2023	LD1_1	HaiN	108.98	18.45	70	25.5495	7.10249	45.4253	319.787	32.4844	16.8488	15.6355	27.4127	21.9624	28.9336	21.1867	1315	271	21	78.8219	699	72	435	86
2023	LD3_1	HaiN	108.98	18.45	70	25.5495	7.10249	45.4253	319.787	32.4844	16.8488	15.6355	27.4127	21.9624	28.9336	21.1867	1315	271	21	78.8219	699	72	435	86
2023	WN1_1	HaiN	110.49	18.97	14	24.9991	6.89042	43.1048	336.634	32.2495	16.2642	15.9853	27.0242	21.388	28.4812	20.3298	1660	283	25	71.9498	787	82	672	92
2023	W-120_1	GD	113.783	23.4256	14	21.3327	7.64879	32.332	585.874	32.0003	8.34325	23.657	26.756	15.2025	27.7798	13.5931	1725	287	34	65.8743	777	115	741	159
2023	W-109_1	GX	107.101	22.1293	121	22.3574	7.54398	35.353	521.507	31.9613	10.6222	21.339	27.9885	16.5657	27.9885	15.3523	1381	253	23	76.8983	723	83	723	90
2023	W-108_1	GX	106.872	22.1749	284	22.0237	7.53056	35.3975	523.46	31.633	10.3588	21.2743	27.662	16.2373	27.662	14.9883	1325	243	23	75.2395	680	81	680	87
2023	W-121_1	GD	113.359	23.479	36	21.6449	7.89419	32.8131	594.535	32.5525	8.4945	24.058	27.132	15.4489	28.1713	13.7816	1691	279	33	65.6546	764	114	717	156
2023	DZ2-2_1	HaiN	109.5	19.58	55	24.0957	7.5161	41.8993	389.271	32.3558	14.4172	17.9385	27.6591	18.7743	28.2108	18.7743	1708	291	17	76.7253	832	67	747	67
2023	QZ8_1	HaiN	109.66	19.03	341	21.9078	6.98992	43.0155	343.741	29.1287	12.879	16.2498	23.8949	17.1454	25.4553	17.1454	1636	290	19	75.8911	796	70	692	70
2023	LD4_1	HaiN	108.88	18.52	28	24.4535	7.04727	44.7169	327.582	31.417	15.6573	15.7597	26.3798	20.7957	27.8842	19.9741	1324	251	20	77.7814	698	69	481	74
2023	HZ1_1	ZJ	120.051	30.1925	41	16.4692	8.02287	25.2866	867.747	32.2752	0.5475	31.7277	24.5187	7.73071	26.8818	5.55762	1333	193	42	43.9617	486	153	472	180
2023	NT3_1	JS	120.892	32.0156	6	15.2585	7.45433	24.0583	892.88	30.5105	-0.474	30.9845	25.9864	4.11946	25.9864	4.11946	1032	173	29	54.6672	448	111	448	111
2023	YZGJ2_1	JS	119.377	32.4027	10	15.5948	8.39854	25.4341	939.537	31.754	-1.26675	33.0207	26.8843	3.77225	26.8843	3.77225	1017	213	29	64.8313	488	101	488	101
2023	W-135_1	HLJ	125.285	45.7155	149	4.45304	11.9722	22.8229	1519.28	27.9395	-24.5175	52.457	22.0415	-15.4439	22.0415	-15.4439	475	152	2	117.538	330	8	330	8
2023	W-80_1	JL	127.347	43.8833	306	2.8807	12.4929	24.0795	1451.79	25.0637	-26.8183	51.882	19.4204	-16.6712	19.4204	-16.6712	643	171	5	102.009	410	19	410	19
2023	W-94_1	HLJ	127.115	44.3946	275	3.3735	12.2957	23.7097	1463.84	25.5063	-26.3533	51.8595	20.125	-16.2671	20.125	-16.2671	612	170	4	105.108	396	16	396	16
2023	W-19-2_1	GS	106.592	35.2216	1470.6	8.02016	10.7103	30.4752	886.945	24.933	-10.2113	35.1442	17.4286	-3.31188	18.652	-3.31188	564	105	3	81.3543	306	14	271	14
2015	15-1-2_1	HillX	111.762	36.5746	596	11.3687	12.5278	31.2382	1030.11	30.253	-9.851	40.104	21.9232	-1.95608	23.5132	-1.95608	478	119	3	99.51	300	12	281	12
2023	23-2-26_1	HillX	113.928	39.4369	1165	5.67767	13.5974	31.3991	1109.88	25.5535	-17.7515	43.305	18.6949	-8.71867	18.6949	-8.71867	436	124	3	105.439	281	13	281	13
2015	15-2-2_1	SD	117.126	36.749	27	13.627	9.4759	25.2092	1069.7	31.1365	-6.4525	37.589	26.1974	-0.264208	26.1974	-0.264208	688	222	5	116.076	459	19	459	19
2023	W-88_1	JL	126.482	43.4613	309	3.13324	12.2124	23.9624	1418.21	24.7332	-26.2315	50.9648	19.3702	-15.9258	19.3702	-15.9258	719	196	6	102.233	458	22	458	22
2023	W-77-2_1	JL	123.475	43.455	126	7.16983	12.2953	25.1804	1369.55	28.905	-19.924	48.829	23.1586	-10.6393	23.1586	-10.6393	488	149	2	115.247	337	8	337	8
2023	W-82_1	JL	124.242	43.1925	170	6.64861	11.7467	24.5351	1357.53	27.9325	-19.9445	47.877	22.354	-11.204	22.354	-11.204	599	172	4	107.763	393	15	393	15
2023	W-18_1	GS	105.55	34.2511	1346.1	8.91698	10.0002	30.5722	822.424	24.8228	-7.88725	32.71	17.7191	-1.62867	18.812	-1.62867	645	118	4	79.2868	331	16	308	16
2023	W-77_1	JL	123.475	43.455	126	7.16983	12.2953	25.1804	1369.55	28.905	-19.924	48.829	23.1586	-10.6393	23.1586	-10.6393	488	149	2	115.247	337	8	337	8
2023	W-86_1	JL	124.53	44.5244	209	4.97243	11.5646	22.9226	1462.52	27.6912	-22.7593	50.4505	21.8204	-14.2604	21.8204	-14.2604	492	160	2	118.166	343	8	343	8
2023	W-134_1	HLJ	125.588	45.7742	187	4.26668	11.9414	22.8638	1517.76	27.5543	-24.6742	52.2285	21.8438	-15.6111	21.8438	-15.6111	493	155	2	116.263	340	9	340	9
2023	W-89_1	HLJ	126.223	45.2421	156	4.37945	12.0374	22.8539	1521.8	27.2003	-25.4708	52.671	21.8475	-15.743	21.8475	-15.743	536	161	3	111.432	359	12	359	12
2023	W-72_1	HLJ	132.189	47.2965	71.3	2.95599	10.6991	20.8953	1508.38	27.0315	-24.172	51.2035	20.3803	-16.8393	20.3803	-16.8393	546	127	5	93.0487	325	19	325	19
2023	W-103_1	JS	119.004	33.2179	4	14.7954	8.10581	24.9678	929.158	30.1238	-2.34125	32.465	25.9224	3.00575	25.9224	3.00575	869	221	23	79.6548	458	77	458	77
2023	W-8-2_1	NX	105.75	37.46	1150	9.39923	13.7083	31.2629	1089.04	30.251	-13.5975	43.8485	20.604	-4.75388	22.196	-4.75388	228	61	1	96.5543	140	4	130	4
2023	23-2-1-2_1	SD	116.644	36.9402	23	13.1653	9.91781	25.6833	1086.43	31.1565	-7.45925	38.6157	26.0361	-0.8655	26.0361	-0.8655	594	194	4	120.334	409	15	409	15
2023	W-143_1	HN	114.787	33.1566	44	15.1477	10.0323	28.7228	950.376	31.6895	-3.2385	34.928	26.5835	3.05621	26.5835	3.05621	872	198	13	72.0082	427	57	427	57
2023	23-2-32_1	HillX	112.688	38.4448	794	9.39701	13.6763	31.8217	1102.31	28.7358	-14.2422	42.978	22.0624	-4.98596	22.0624	-4.98596	426	112	2	106.209	272	9	272	9
2023	23-1-21_1	AH	115.312	33.0706	33	15.2727	9.8654	28.4146	948.742	31.748	-2.9715	34.7195	26.6787	3.17458	26.6787	3.17458	862	200	13	72.8615	425	58	425	58
2015	15-95_1	SX	107.756	34.2804	488	12.6125	9.65323	28.366	902.013	29.2908	-4.74025	34.031	22.2159	1.21117	23.6468	1.21117	670	122	4	74.857	342	19	287	19
2015	15-92_1	HillX	116.589	37.3471	20	13.0657	10.4275	26.346	1110.03	31.3805	-8.19875	39.5792	26.174	-1.23333	26.174	-1.23333	509	170	3	127.063	367	12	367	12
2023	W-146-1_1	HN	114.883	33.2292	39	15.0811	10.1581	28.7925	956.268	31.8185	-3.462	35.2805	26.6004	2.91717	26.6004	2.91717	838	197	12	74.5891	417	53	417	53

## Sheet: Data3
Supplementary Data 3. Details of single environment factors from WorldClim database used for the populations of this study
ID	SX	ZJ	SJZ	DZ	LF	HZ	JN
Longitude	110.595	114.381	114.992	116.846	116.229	116.137	117.627
Latitude	34.8683	35.7308	37.6665	37.6858	39.3288	36.0837	36.6736
Altitude	366	115	35	19	20	43	175
Annual Mean Temperature	13.7835	14.0679	13.3077	13.0382	12.4132	13.3291	13.5856
Mean Diurnal Range (Mean of monthly (max temp - min temp))	11.65	10.7202	11.3844	10.9043	11.7327	10.5764	10.3369
Isothermality (BIO2/BIO7) (×100)	30.8133	28.6904	28.0852	27.3589	28.6348	27.8305	27.6719
Temperature Seasonality (standard deviation ×100)	986.424	1007.94	1086.44	1105.5	1112.04	1055.86	1037.76
Max Temperature of Warmest Month	31.4118	31.777	32.3008	31.2927	30.8892	30.831	31.1115
Min Temperature of Coldest Month	-6.39675	-5.58825	-8.2345	-8.56375	-10.0843	-7.17175	-6.2435
Temperature Annual Range (BIO5-BIO6)	37.8085	37.3652	40.5353	39.8565	40.9735	38.0028	37.355
Mean Temperature of Wettest Quarter	24.0285	24.5339	26.1562	25.9948	25.3657	25.705	25.9092
Mean Temperature of Driest Quarter	1.13112	1.09379	-0.762458	-1.28654	-2.01858	-0.4145	0.202042
Mean Temperature of Warmest Quarter	25.5639	26.0461	26.1562	25.9948	25.3657	25.705	25.9092
Mean Temperature of Coldest Quarter	1.13112	1.09379	-0.762458	-1.28654	-2.01858	-0.4145	0.202042
Annual Precipitation	560	557	481	491	537	675	611
Precipitation of Wettest Month	111	155	151	168	207	220	185
Precipitation of Driest Month	6	4	3	4	2	5	7
Precipitation Seasonality (Coefficient of Variation)	75.1917	104.293	121.32	129.574	148.62	115.815	106.729
Precipitation of Wettest Quarter	289	348	335	359	430	450	386
Precipitation of Driest Quarter	19	17	11	13	10	20	24
Precipitation of Warmest Quarter	257	346	335	359	430	450	386
Precipitation of Coldest Quarter	19	17	11	13	10	20	24
mean temperature 1	-0.58225	-0.5745	-2.3865	-3.14075	-3.98375	-2.09875	-1.44625
mean temperature 2	2.9605	2.4175	0.548	0.094	-0.3465	0.73175	1.46675
mean temperature 3	8.29	7.68125	7.011	6.16525	6.03725	6.78725	7.1485
mean temperature 4	15.3042	14.9948	14.521	14.2908	14.4097	14.6307	14.491
mean temperature 5	20.374	20.4552	20.422	20.3018	19.9355	20.175	20.1155
mean temperature 6	24.92	25.743	25.9757	25.3475	24.7633	25.1537	25.362
mean temperature 7	26.4228	26.815	26.9535	26.8872	26.3325	26.5305	26.7507
mean temperature 8	25.349	25.5848	25.557	25.7448	25.0085	25.4263	25.617
mean temperature 9	20.3193	21.2052	20.8567	21.045	20.2868	20.927	21.0268
mean temperature 10	14.152	15.4253	14.661	14.5915	13.5548	14.8162	14.9522
mean temperature 11	6.8875	7.63125	6.0145	5.95525	4.6955	6.74575	6.96325
mean temperature 12	1.01025	1.4355	-0.44575	-0.81375	-1.7005	0.12175	0.588
max. temperature 1	5.2445	4.45	3.46075	2.273	2.10525	2.97375	3.3525
max. temperature 2	8.96975	7.8295	6.50575	5.70075	5.756	6.1515	6.67475
max. temperature 3	14.3818	13.0705	12.911	11.991	12.3593	12.389	12.594
max. temperature 4	21.9028	20.8225	20.4848	20.418	21.075	20.6722	20.2935
max. temperature 5	27.0655	26.4422	26.531	26.3845	26.3205	26.1712	26.0005
max. temperature 6	31.2288	31.777	32.3008	31.1963	30.8352	30.831	31.1115
max. temperature 7	31.4118	31.281	31.6807	31.2927	30.8892	30.828	31.0208
max. temperature 8	30.1938	29.823	29.879	29.8675	29.369	29.674	29.8573
max. temperature 9	25.4653	26.5338	26.478	26.3335	25.9985	26.2092	26.2437
max. temperature 10	19.8515	21.4457	21.204	20.5338	20.0413	20.4373	20.4895
max. temperature 11	12.6707	13.0885	11.6987	11.548	10.5995	12.0555	12.12
max. temperature 12	6.91625	6.572	4.86375	4.34475	4.00625	5.01475	5.29
min. temperature 1	-6.39675	-5.58825	-8.2345	-8.56375	-10.0843	-7.17175	-6.2435
min. temperature 2	-3.0515	-2.99525	-5.40275	-5.5025	-6.45775	-4.6885	-3.74225
min. temperature 3	2.20375	2.29075	1.10325	0.335	-0.2815	1.18075	1.699
min. temperature 4	8.7065	9.16625	8.571	8.14975	7.74625	8.5915	8.69075
min. temperature 5	13.686	14.467	14.3007	14.228	13.5472	14.1742	14.231
min. temperature 6	18.608	19.7078	19.6602	19.501	18.6887	19.4722	19.5998
min. temperature 7	21.4353	22.346	22.2048	22.4867	21.77	22.2345	22.4835
min. temperature 8	20.506	21.3417	21.2115	21.6248	20.642	21.19	21.3825
min. temperature 9	15.159	15.878	15.2495	15.7437	14.571	15.647	15.816
min. temperature 10	8.444	9.3985	8.14425	8.6415	7.06375	9.19575	9.40775
min. temperature 11	1.097	2.18575	0.34525	0.3595	-1.2055	1.43225	1.8005
min. temperature 12	-4.8955	-3.70525	-5.76775	-5.9715	-7.437	-4.76675	-4.11925
solar radiation 1	0.2861	0.30355	0.271275	0.264525	0.2184	0.27925	0.319975
solar radiation 2	0.34425	0.36415	0.316575	0.309925	0.257625	0.326625	0.379675
solar radiation 3	0.5235	0.5742	0.501075	0.47265	0.409275	0.478425	0.56885
solar radiation 4	0.838275	0.94225	0.83035	0.802975	0.7013	0.80605	0.940275
solar radiation 5	1.23172	1.38573	1.31418	1.29825	1.18128	1.29317	1.44735
solar radiation 6	1.66842	1.84155	1.8203	1.82275	1.78338	1.81855	1.91852
solar radiation 7	2.29938	2.7025	2.6155	2.61515	2.55128	2.60405	2.75237
solar radiation 8	2.2234	2.59667	2.53207	2.5286	2.44642	2.50845	2.64863
solar radiation 9	1.58353	1.75515	1.67195	1.6768	1.5803	1.65918	1.78807
solar radiation 10	1.01287	1.12598	1.0472	1.00892	0.9127	1.00705	1.12675
solar radiation 11	0.578375	0.645825	0.583025	0.56005	0.48885	0.569	0.64965
solar radiation 12	0.348075	0.382225	0.3477	0.33975	0.2885	0.349075	0.3974
wind speed 1	1.793	2.007	1.9665	2.195	2.0235	2.4555	2.2665
wind speed 2	2.11975	2.29725	2.32975	2.58775	2.268	2.67975	2.6355
wind speed 3	2.3435	2.666	2.66025	3.1015	2.79425	3.34375	3.077
wind speed 4	2.4935	2.59875	2.67275	3.31425	3.12425	3.49425	2.936
wind speed 5	2.2435	2.47325	2.77975	3.12975	2.98575	3.32675	3.02525
wind speed 6	2.12625	2.53925	2.59925	2.733	2.5065	2.89525	2.77975
wind speed 7	1.807	2.09	2.02975	2.255	1.9	2.5225	2.319
wind speed 8	1.5435	1.79725	1.571	1.74075	1.56175	2.20725	2.0845
wind speed 9	1.5555	1.72925	1.7	1.9565	1.8	2.117	1.90025
wind speed 10	1.728	2.08225	2	2.22775	2.09625	2.332	2.18175
wind speed 11	2.03975	2.2	2.243	2.1715	2.00875	2.37325	2.35325
wind speed 12	1.748	2.0165	2.02275	2.19125	2.1	2.4305	2.278
precipitation 1	6	4	3	4	4	5	7
precipitation 2	7	8	5	4	2	9	9
precipitation 3	21	15	8	8	8	14	16
precipitation 4	41	27	24	18	11	35	31
precipitation 5	56	40	23	34	25	41	41
precipitation 6	59	59	52	58	63	79	69
precipitation 7	111	155	151	168	207	220	185
precipitation 8	87	132	132	133	160	151	132
precipitation 9	91	61	41	37	39	66	63
precipitation 10	52	34	23	16	8	31	34
precipitation 11	23	17	16	6	6	18	16
precipitation 12	6	5	3	5	4	6	8
																																	2.1

## Sheet: Data4
Supplementary Data 4. Details of accessions collected from the Huang-Huai-Hai agroecosystem used in single-dose bioassays.
ID	Province	Species	Year
13-34	Hebei, China	D. sanguinalis	2013
13-35	Hebei, China	D. sanguinalis	2013
13-36	Hebei, China	D. sanguinalis	2013
13-37	Henan, China	D. sanguinalis	2013
13-38	Henan, China	D. sanguinalis	2013
13-39	Shandong, China	D. sanguinalis	2013
13-40	Shandong, China	D. sanguinalis	2013
13-42	Beijing, China	D. sanguinalis	2013
13-44	Shandong, China	D. sanguinalis	2013
13-45	Shandong, China	D. sanguinalis	2013
13-48	Henan, China	D. sanguinalis	2013
13-49	Shandong, China	D. sanguinalis	2013
13-50	Shandong, China	D. sanguinalis	2013
13-51	Shandong, China	D. sanguinalis	2013
13-52	Hebei, China	D. sanguinalis	2013
13-53	Hebei, China	D. ciliaris	2013
13-54	Shandong, China	D. sanguinalis	2013
13-56	Henan, China	D. sanguinalis	2013
13-59	Henan, China	D. sanguinalis	2013
13-62	Shandong, China	D. sanguinalis	2013
13-68	NA	D. sanguinalis	2013
15-1	Shanxi, China	D. sanguinalis	2015
15-10	Shandong, China	D. ciliaris	2015
15-107	Henan, China	D. sanguinalis	2015
15-116	Hebei, China	D. ciliaris	2015
15-117	Hebei, China	D. sanguinalis	2015
15-12	Shanxi, China	D. sanguinalis	2015
15-125	Anhui, China	D. sanguinalis	2015
15-14	Shanxi, China	D. sanguinalis	2015
15-15	Shandong, China	D. sanguinalis	2015
15-18	Jiangsu, China	D. sanguinalis	2015
15-2	Shandong, China	D. sanguinalis	2015
15-20	Henan, China	D. sanguinalis	2015
15-22	Jiangsu, China	D. sanguinalis	2015
15-24	Anhui, China	D. sanguinalis	2015
15-25	Henan, China	D. sanguinalis	2015
15-27	Shandong, China	D. sanguinalis	2015
15-28	Shanxi, China	D. sanguinalis	2015
15-29	Shanxi, China	D. sanguinalis	2015
15-3	Anhui, China	D. sanguinalis	2015
15-30	Shandong, China	D. sanguinalis	2015
15-33	Shanxi, China	D. sanguinalis	2015
15-35	Henan, China	D. sanguinalis	2015
15-37	Hebei, China	D. sanguinalis	2015
15-4	Shandong, China	D. sanguinalis	2015
15-40	Beijing, China	D. sanguinalis	2015
15-42	Shanxi, China	Outlier	2015
15-43	Henan, China	D. sanguinalis	2015
15-44	Shanxi, China	D. sanguinalis	2015
15-47	Shanxi, China	D. sanguinalis	2015
15-5	Henan, China	D. sanguinalis	2015
15-50	Shandong, China	D. sanguinalis	2015
15-52	Henan, China	D. sanguinalis	2015
15-53	Shandong, China	D. sanguinalis	2015
15-54	Henan, China	D. sanguinalis	2015
15-56	Shandong, China	D. sanguinalis	2015
15-57	Shandong, China	D. sanguinalis	2015
15-58	Shandong, China	D. sanguinalis	2015
15-59	Shandong, China	D. sanguinalis	2015
15-6	Hebei, China	D. sanguinalis	2015
15-61	Shanxi, China	D. sanguinalis	2015
15-63	Shandong, China	D. sanguinalis	2015
15-64	Henan, China	D. sanguinalis	2015
15-65	Tianjin, China	D. sanguinalis	2015
15-66	Shanxi, China	D. sanguinalis	2015
15-68	Shandong, China	D. sanguinalis	2015
15-69	Shandong, China	D. sanguinalis	2015
15-70	Shandong, China	D. sanguinalis	2015
15-71	Shandong, China	D. sanguinalis	2015
15-72	Hebei, China	D. sanguinalis	2015
15-74	Shanxi, China	D. sanguinalis	2015
15-75	Henan, China	D. sanguinalis	2015
15-77	Hebei, China	D. sanguinalis	2015
15-80	Shandong, China	D. sanguinalis	2015
15-92	Shanxi, China	D. ischaemum	2015
19-02	Shandong, China	D. sanguinalis	2019
21-12	Anhui, China	D. sanguinalis	2021
21-13	Anhui, China	D. sanguinalis	2021
21-18	Jiangsu, China	D. sanguinalis	2021
21-2	Shandong, China	D. sanguinalis	2021
21-22	Henan, China	D. sanguinalis	2021
21-26	Jiangsu, China	D. sanguinalis	2021
21-28	Jiangsu, China	D. sanguinalis	2021
21-29	Anhui, China	D. sanguinalis	2021
23-1-11	Anhui, China	D. sanguinalis	2023
23-1-13	Henan, China	D. sanguinalis	2023
23-1-14	Henan, China	D. sanguinalis	2023
23-1-15	Anhui, China	D. sanguinalis	2023
23-1-16	Anhui, China	D. sanguinalis	2023
23-1-18	Anhui, China	D. sanguinalis	2023
23-1-2	Shandong, China	D. sanguinalis	2023
23-1-20	Anhui, China	D. sanguinalis	2023
23-1-24	Henan, China	D. sanguinalis	2023
23-1-37	Henan, China	D. sanguinalis	2023
23-1-38	Henan, China	D. sanguinalis	2023
23-1-47	Henan, China	D. sanguinalis	2023
23-1-49	Shanxi, China	D. sanguinalis	2023
23-1-5	Shandong, China	D. sanguinalis	2023
23-1-51	Shanxi, China	D. sanguinalis	2023
23-1-53	Shanxi, China	D. sanguinalis	2023
23-1-54	Shanxi, China	D. sanguinalis	2023
23-1-55	Shanxi, China	D. sanguinalis	2023
23-1-57	Shanxi, China	D. ciliaris	2023
23-1-59	Shanxi, China	D. sanguinalis	2023
23-1-62-2	Shanxi, China	D. sanguinalis	2023
23-1-63	Shanxi, China	D. ciliaris	2023
23-1-69	Henan, China	D. sanguinalis	2023
23-1-73	Shandong, China	D. sanguinalis	2023
23-1-75	Shandong, China	D. sanguinalis	2023
23-1-78	Shandong, China	D. sanguinalis	2023
23-2-10	Hebei, China	D. sanguinalis	2023
23-2-11	Hebei, China	D. sanguinalis	2023
23-2-12	Hebei, China	D. ciliaris	2023
23-2-1-2	Shandong, China	D. ischaemum	2023
23-2-14	Hebei, China	D. ciliaris	2023
23-2-18	Hebei, China	D. sanguinalis	2023
23-2-21	Hebei, China	D. ciliaris	2023
23-2-22	Hebei, China	D. ciliaris	2023
23-2-23	Shanxi, China	D. sanguinalis	2023
23-2-26	Shanxi, China	D. violascens	2023
23-2-27	Shanxi, China	D. ciliaris	2023
23-2-30	Shanxi, China	D. sanguinalis	2023
23-2-32	Shanxi, China	D. ischaemum	2023
23-2-42	Hebei, China	D. ciliaris	2023
23-2-6	Hebei, China	D. sanguinalis	2023
23-2-9	Hebei, China	D. sanguinalis	2023
23-3-10	Jiangsu, China	D. sanguinalis	2023
23-3-17	Jiangsu, China	D. sanguinalis	2023
23-3-21	Jiangsu, China	D. sanguinalis	2023
23-3-34	Shandong, China	D. sanguinalis	2023
23-3-43	Shandong, China	D. sanguinalis	2023
23-3-59	Shandong, China	Outlier	2023
MMT-13-10	Shanxi, China	D. sanguinalis	2013
MMT-13-11	Shandong, China	D. sanguinalis	2013
MMT-13-13	Shandong, China	D. sanguinalis	2013
MMT-13-15	Shanxi, China	D. sanguinalis	2013
MMT-13-16	Shandong, China	D. sanguinalis	2013
MMT-13-19	Shandong, China	D. sanguinalis	2013
MMT-13-26	Shanxi, China	D. sanguinalis	2013
MMT-13-28	Shandong, China	D. sanguinalis	2013
MMT-13-31	Shandong, China	D. sanguinalis	2013
MMT-13-6	Shanxi, China	D. sanguinalis	2013
MMT-13-7	Henan, China	D. ciliaris	2013
MMT-13-9	Shandong, China	D. ciliaris	2013
MT-13-11	Shanxi, China	D. sanguinalis	2013
MT-13-12	Shanxi, China	D. sanguinalis	2013
MT-13-15	Shanxi, China	D. sanguinalis	2013
MT-13-17	Anhui, China	D. sanguinalis	2013
MT-13-2	Henan, China	D. sanguinalis	2013
MT-13-23	Henan, China	D. sanguinalis	2013
MT-13-26	Hebei, China	D. sanguinalis	2013
MT-13-28	Henan, China	D. sanguinalis	2013
MT-13-29	Shandong, China	D. sanguinalis	2013
MT-13-3	Shanxi, China	D. sanguinalis	2013
MT-13-31	Hebei, China	D. sanguinalis	2013
MT-13-32	Anhui, China	D. sanguinalis	2013
MT-13-4	Anhui, China	D. sanguinalis	2013
MT-13-5	Shandong, China	D. sanguinalis	2013
RMT-13-007	Shandong, China	D. sanguinalis	2023
RMT-13-3	Henan, China	D. sanguinalis	2015
RMT-13-4	NA	D. sanguinalis	2013
RMT-13-6	Hebei, China	D. sanguinalis	2013
