# Supplementary material for: The Digitaria genomes reveal local adaption and herbicide resistance mediated by introgression
Source: Research Square preprint supplement (doi:10.21203/rs.3.rs-7329239/v1), 2025-09-13
Supplement: Supplementary file 3 [file baae35180d8de92aad91cf97.docx]

### Supplementary Note 1. The details of progenitor genome assembly

Polyploidy accessions exhibited ploidy-correlated morphometric traits and showed high sequence similarity with corresponding subgenomes in the hexaploid genome (Coverage 95.63% for CH, 86.57% for DH and 87.75% for EH), as revealed by whole-genome alignments **(Fig. 1a; Supplementary Fig. 5)**. For *D. radicosa* assembly, we generated 80× PacBio HiFi reads and 99× Illumina paired-end reads. These reads were assembled into 662 contigs, yielding a draft genome of approximately 489.39 Mb, with a contig N50 of 48.39 Mb **(Supplementary Table 3)**. Owing to its high nucleotide similarity with the CH subgenome, the draft was further anchored to 9 scaffolds with the aid of CH sequences, resulting in a scaffold N50 of 53.19 Mb. Centromeric and telomeric regions were identified in all chromosomes **(Supplementary Table 5)**, and a total of 37,527 protein-coding genes were predicted. For *D. milanjiana*, *de novo* assembly yielded a draft genome of 909 Mb, with contig and scaffold N50 of 41 Mb and 52 Mb, respectively **(Supplementary Table 3)**. The assembled genome size of *D. radicosa* slightly exceeded the estimated genome size, likely due to heterozygosity (~0.13%) resulting in artificial expansion of haplotype-resolved regions, along with erroneous enlargement of repetitive elements during graph-based scaffolding **(Supplementary Fig. 2)**. Whole-genome alignments revealed extensive synteny between *D. sanguinalis* and its progenitors, with conserved macro-collinearity across 95.0% of the genome, providing independent validation for our chromosome-scale assembly quality.

### Supplementary Note 2. Taxonomy and evolution of *Digitaira*

Digitaria is a widespread genus within the Poaceae family, subfamily Panicoideae, tribe Paniceae, and subtribe Anthephorinae, commonly found across pantropical regions. At least 17 species of Digitaria are recognized as problematic weeds globally, including D. ischaemum, D. violascens, D. ciliaris, and D. sanguinalis. Additionally, D. exilis and D. iburua are important native cereal crops of West Africa, holding significant social, economic, and nutritional value.

Species within the traditional circumscription of the Digitaria genus typically exhibit racemose inflorescences, with spikelets arranged in various patterns: solitary, paired (binate), or in groups of three (ternate) or more. Based on previous morphological, cytological, and molecular studies on Digitaria taxonomy (Adoukonou-Sagbadja et al., 2007; Boonsuk et al., 2016; Chaves et al., 2021; Gould, 1963; Kok et al., 1989; Touafchia et al., 2023) , combined with current genomic data and taxonomic information from sources such as GBIF (Global Biodiversity Information Facility), iPlant.cn, Flora of China, and ITIS (Integrated Taxonomic Information System), Digitaria species in the traditional classification are generally divided into two groups based on inflorescence type: the binate group and the ternate group. These species diverged approximately 12 million years ago, followed by significant polyploidization and rediploidization events that further shaped their evolution.

1. Binate group

The binate group of *Digitaria* comprises several widely distributed and ecologically important species, particularly those regarded as noxious weeds, including *D. bicornis*, *D. sanguinalis*, and *D. ciliaris*. These species are prevalent across tropical and temperate regions and exhibit considerable variation in ploidy levels and morphological traits, suggesting complex evolutionary origins potentially involving multiple subgenomes.

Commonly known as Asian crabgrass, *D. bicornis* is predominantly distributed in tropical and subtropical Asia, extending into Australia, with occasional reports from temperate regions (Webster, 1987). Some sources have also suggested possible origins in the New World or Africa (R.d, 1980). Morphologically, this species is characterized by dimorphic spikelets: the lower spikelet is glabrous, while the upper one is pubescent. The lower glume is typically rudimentary-triangular or bifid in shape, veinless, and rarely exceeding 0.4 mm in length. The plant exhibits a confirmed perennial growth habit via basal regeneration. It also displays the highest tillering capacity and the greatest leaf inclination angle among surveyed species. Flow cytometry-based genome size estimation suggests an octoploid constitution, comprising subgenomes C, D, E, and an additional unidentified subgenome **(Supplementary Fig. 12; Supplementary Table 7)**.

Known as southern crabgrass, *D. ciliaris* likely originated in Asia but is now widespread throughout tropical and subtropical zones in both hemispheres (Gleason and Cronquist, 1991). Its caryopses are notably pubescent, bearing elongated trichomes and an oblong shape. The culms exhibit intermediate levels of anthocyanin pigmentation.

*D. radicosa* (commonly known as Timorese crabgrass) is natively distributed across tropical and subtropical regions of Asia and the Pacific (Minoji and Sakai, 2024). This small-statured plant typically reaches 20-40 cm in height. Its spikelets are lanceolate in shape, with the upper glume exhibiting pubescence and an acute apex.

*D. milanjiana* (commonly known as digit grass), synonymous with *D. seriata* and *D. eriantha*, is native to Africa but has naturalized in Europe, North America, and Southeast Asia. This versatile grass is primarily utilized for forage in long-term grazing systems, while also being suitable for cut-and-carry operations and hay production (Hacker, 1984). Additionally, it serves as an effective rotational crop between banana cultivation cycles (Hacker, 1988). At maturity, the upper lemma develops a distinctive grayish to tan coloration.

Commonly referred to as large crabgrass, *D. sanguinalis* is native to North Africa and the warmer regions of Eurasia. It is currently found across temperate and warm areas globally, with a more temperate distribution compared to other widespread *Digitaria* species(Burton et al., 2025; Kok et al., 1989; Webster, 1987). This species is a confirmed hexaploidy, composed of three distinct subgenomes **(Supplementary Fig. 1)**. Morphologically and ecologically diverse, *D. sanguinalis* is further divided into several botanical varieties based on habitat and phenotype.

*D. sanguinalis* var. *pubescens* is predominantly found in arid farmlands north of Yellow river **(Fig. 2b)**. This variety exhibits relatively short leaf blades and a large leaf inclination angle **(Supplementary Figs. 16 and 17)**. Its seeds are oblong with golden bristles and longer trichomes than other varieties. The spikelets show a relatively high thousand-seed weight.

*D. sanguinalis* var. *sanguinalis* is common in dry agricultural regions south of Yellow river **(Fig. 2b)** and is featured as green culms and narrower seeds with short pubescence.

*D. sanguinalis* var. *parvispicula* is distributed mainly in subtropical southern China, especially near stream banks and paddy fields **(Fig. 2b)**. This variety produces the smallest seeds among all varieties, which are elongate and densely packed. The plant exhibits minimal leaf inclination and culm-tilting angles **(Supplementary Figs. 16 and 17)**.

*D. sanguinalis* var. *glabra* is primarily found in temperate croplands and ruderal habitats such as roadsides and urban areas **(Fig. 2b)**. This variety exhibits glabrous culms and leaves, along with whitish seed trichomes. It shows the highest thousand-seed weight among the *Digitaria* species and maintains a compact, upright growth form.

1. Ternate group

The ternate group of *Digitaria* includes both cereal crops and globally distributed weed species. Notable examples include the West African cereals *D. exilis* and *D. iburua*, and the widespread weeds *D. ischaemum* and *D. violascens*. Species in this group exhibit considerable genome size variation, suggesting divergent genome compositions and complex evolutionary histories.

*D. ischaemum*, commonly known as smooth crabgrass, is native to Eurasia and has been introduced to North America. It exhibits the largest leaf blades within the ternate group, as well as increased tiller production and comparatively larger spikelets than related species.

*D. violascens* (synonymous to *D. chinensis*), referred to as violet crabgrass, is believed to have originated in South America, but is now naturalized across multiple continents. It is primarily found in arid farmlands in northeastern China. The species is distinguished by its relatively small overall plant size, reduced leaf and spikelet dimensions, and low tiller number. The most diagnostic feature is its glabrous, distinctly purple spikelets.

These two fonio millet species are native to West Africa. *D. exilis*, also known as white fonio, is the more widely cultivated species, with a geographic range extending from Senegal to Nigeria, and potentially reaching as far as Lake Chad. In contrast, *D. iburua* (black fonio) is restricted to the highlands of central Nigeria (Cruz et al., 2016). Phylogenetic evidence suggests that *D. longiflora* is the closest wild relative of *D. exilis*, whereas *D. ternata* is the likely progenitor of *D. iburua* (Kaczmarek et al., 2025; Portères, 1955). Recent genomic studies have confirmed that these crops underwent independent domestication and cultivation processes (Kaczmarek et al., 2025). Despite being cultivated, both species retain incomplete domestication traits such as strong seed shattering. Morphologically, they share an erect growth habit, with *D. iburua* exhibiting deeper pigmentation in spikelets than *D. exilis*, leading to their vernacular distinctions as “black fonio” and “white fonio” (Adoukonou-Sagbadja et al., 2010, 2006).

### Supplementary Note 3. Herbicide transcriptome atlas

To investigate the transcriptional regulatory mechanisms underlying NTSR in *D. sanguinalis*, we performed time-course RNA sequencing on leaf tissue of the resistant (R; accession #21-17) versus the susceptible (S; accession #15-2) accessions treated with nicosulfuron. After filtering the raw reads, the Illumina sequencing data are characterized by its biological replicability with Spearman correlation coefficients of *r* > 0.85 **(Supplementary Fig. 32)**. Transcriptomic analyses revealed distinct patterns of differentially expressed genes (DEGs) between R and S accessions under the nicosulfuron treatments. Relative to the untreated controls (0 h), early herbicide exposure (6h after treatment) triggered the differential expression of 4,105 genes, among which 1,865 and 1,380 were uniquely altered in R and S accessions, respectively **(Supplementary Fig. 33a)**. In the late phase (24h after treatment), the number of DEGs increased to 5,477, with 3,037 and 1,477 specifics to R and S accessions **(Supplementary Fig. 33a)**. Thus, the R accessions exhibited progressive transcriptional reprogramming over time, with more genes responding at later stages of herbicide exposure. Herbicide treatment triggered both a greater number of upregulated and downregulated genes in the R compared to the S accession (R: 3,701 upregulated and 2,568 downregulated; S: 2,599 upregulated and 1,498 downregulated) **(Supplementary Fig. 33b)**. In the R accession, 152 NTSR-related genes exhibited induced upregulation, including *AKR1*, *UGT706D1*, *CYP81A6*, and *ABCG43*, which are involved in reactive oxygen species (ROS) scavenging and stress response processes (Guo et al., 2024; ODA et al., 2011; Pan et al., 2022; Peng et al., 2017). Notably, we identified a short-chain dehydrogenase/reductase (SDR), *DsSOH1*, a widely conserved enzyme family implicated in detoxification and abiotic stress responses (Chatterjee et al., 2025; Du et al., 2022; Loubet et al., 2023; Nakazono et al., 2000). It exhibited nicosulfuron-inducible upregulation specifically in the R but not the S accession **(Supplementary Fig. 30)**.

​To investigate whether constitutive transcriptional differences contribute to NTSR, we analyzed genes that showed consistent expression divergence between R and S accessions before nicosulfurontreatment **(Supplementary Fig. 33c)**. A total of 149 genes exhibited constitutive differential expression, with 75 up-regulated and 74 down-regulated. Among the upregulated genes, 2 were previously implicated in herbicide detoxification processes. Among these, 2 genes (*CYP75B3* and *OsCYP92C21*) have homologs in rice that are involved in abiotic stress responses, including drought, cold, and salt tolerance (Chen et al., 2022; Li et al., 2021). Notably, expression of *DsALS* showed no significant divergency between R and S accessions, consistent with the copy number analysis, suggesting its limited role in the observed resistance phenotype **(Supplementary Fig. 33d)**.

To dissect transcriptomic responses underpinning herbicide resistance, we conducted hierarchical clustering on genes with RPKM > 0.3 in R and S following herbicide exposure **(Supplementary Fig. 34)**.​​ ​This analysis revealed more pronounced transcriptional reprogramming in R accessions.​​ Prior to herbicide treatment (0 h), all biological replicates from R and S accessions clustered together, indicating a shared baseline transcriptomic profile **(Supplementary Fig. 34)**.​​ ​To elucidate resistance mechanisms, DEGs within clusters were subjected to GO enrichment analysis **(Supplementary Fig. 34)**.​ Under ALS-inhibitor treatment, genes involved in leucine metabolic were transiently upregulated during early exposure, followed by downregulation at later stages **(Supplementary Fig. 34)**. In contrast, genes associated with light response and peroxidative stress exhibited progressive induction over time. This reciprocal temporal pattern likely reflects a transition from initial metabolic compensation to late-stage stress defense: early upregulation of photosynthetic genes may fulfill heightened energy demand, while sustained exposure leads to reactive oxygen species (ROS) accumulation, triggering photoprotective and antioxidant pathways. This response aligns with observations in *Lolium multiflorum* and *Marchantia polymorpha*, where ALS-inhibitor treatment similarly induced enrichment of DEGs in metabolic processes and elevated amino acid levels (Casey et al., 2023; Xu et al., 2025). ​Additionally, genes associated with ribosomal biogenesis displayed consistent upregulation​ throughout herbicide exposure **(Supplementary Fig. 34)**. This sustained induction, ​also observed in *Brassica napus* under ALS-inhibitor stress, may represent a compensatory mechanism countering herbicide-induced disruption of translational homeostasis and developmental programming (Liu et al., 2017).

### Reference

Adoukonou-Sagbadja, H., Dansi, A., Vodouhè, R., Akpagana, K., 2006. Indigenous knowledge and traditional conservation of fonio millet (Digitaria exilis, Digitaria iburua) in Togo. Biodivers. Conserv. 15, 2379–2395.

Adoukonou-Sagbadja, H., Schubert, V., Dansi, A., Jovtchev, G., Meister, A., Pistrick, K., Akpagana, K., Friedt, W., 2007. Flow cytometric analysis reveals different nuclear DNA contents in cultivated Fonio (Digitaria spp.) and some wild relatives from West-Africa. Plant Syst. Evol. 267, 163–176.

Adoukonou-Sagbadja, H., Wagner, C., Ordon, F., Friedt, W., 2010. Reproductive System and Molecular Phylogenetic Relationships of Fonio Millets (Digitaria spp., Poaceae) with Some Polyploid Wild Relatives. Trop. Plant Biol. 3, 240–251.

Boonsuk, B., Chantaranothai, P., Hodkinson, T.R., 2016. A taxonomic revision of the genus Digitaria (Panicoideae: Poaceae) in mainland Southeast Asia. Phytotaxa 246, 248.

Burton, G.P., Ceci, P., MacKinnon, L., Masters, L.E., Ryan, P., Turnbull, C.G.N., Ulian, T., Vorontsova, M.S., 2025. Phylogenetics, evolution and biogeography of four Digitaria food crop lineages across West Africa, India, and Europe.

Casey, A., Köcher, T., Caygill, S., Champion, C., Bonnot, C., Dolan, L., 2023. Transcriptome changes in chlorsulfuron-treated plants are caused by acetolactate synthase inhibition and not induction of a herbicide detoxification system in Marchantia polymorpha. Pestic. Biochem. Physiol. 191, 105370.

Chatterjee, Y., Tomar, S., Mishra, M., Pareek, A., Singla-Pareek, S.L., 2025. *OsLdh7* Overexpression in Rice Confers Submergence Tolerance by Regulating Key Metabolic Pathways: Anaerobic Glycolysis, Ethanolic Fermentation and Amino Acid Metabolism. Plant Cell Environ. 48, 2804–2820.

Chaves, A.L.A., Chiavegatto, R.B., Ferreira, M.T.M., Rocha, L.C., Azevedo, A.L.S., Benites, F.R.G., Techio, V.H., 2021. Karyotype and leaf epidermis histology traits of Digitaria abyssinica (Hochst. Ex A. Rich.) (Poaceae). Biologia (Bratisl.) 76, 809–817.

Chen, R., Wang, S., Sun, Y., Li, H., Wan, S., Lin, F., Xu, H., 2023. Comparison of Glyphosate-Degradation Ability of Aldo-Keto Reductase (AKR4) Proteins in Maize, Soybean and Rice. Int. J. Mol. Sci. 24, 3421.

Cruz, J.-F., Béavogui, F., Dramé, D., Diallo, T.A., 2016. Fonio, an African cereal. Cirad [UMR Qualisud] IRAG, Institut de recherche agronomique de Guinée, Montpellier] [Conakry (Guinée).

Diédhiou, C.J., Golldack, D., 2006. Salt-dependent regulation of chloride channel transcripts in rice. Plant Sci. 170, 793–800.

Du, H.-M., Liu, C., Jin, X.-W., Du, C.-F., Yu, Y., Luo, S., He, W.-Z., Zhang, S.-Z., 2022. Overexpression of the Aldehyde Dehydrogenase Gene ZmALDH Confers Aluminum Tolerance in Arabidopsis thaliana. Int. J. Mol. Sci. 23, 477.

Gleason, H.A., Cronquist, A., 1991. Manual of Vascular Plants of Northeastern United States and Adjacent Canada: Second Edition.

Gould, F.W., 1963. Cytotaxonomy of Digitaria Sanguinalis and D. Adscendens. Brittonia 15, 241.

Guo, R., Zhang, Q., Chen, C.Z., Sun, J.Y., Tu, C.Y., He, M.X., Shen, R.F., Huang, J., Zhu, X.F., 2024. A novel aldo-keto reductase gene, OsAKR1, from rice confers higher tolerance to cadmium stress in rice by an in vivo reactive aldehyde detoxification. J. Hazard. Mater. 470, 134212.

Hacker, J.B., 1984. Genetic Variation in Seed Dormancy in Digitaria milanjiana in Relation to Rainfall at the Collection Site. J. Appl. Ecol. 21, 947–959.

Hacker, J.B., 1988. Polyploid Distribution and Seed Dormancy in Relation to Provenance Rainfall in the Digitaria milanjiana Complex. Aust. J. Bot. 36, 693–700.

Kaczmarek, T., Cubry, P., Champion, L., Causse, S., Couderc, M., Orjuela, J., Uyoh, E.A., Oselebe, H.O., Dachi, S.N., Adje, C.O.A., Sekloka, E., Achigan-Dako, E.G., Ibrahim Bio Yerima, A.R., Saidou, S.I., Bakasso, Y., Diop, B.M., Gueye, M.C., Agyare, R.Y., Adjebeng-Danquah, J., Gueye, M., Wieringa, J.J., Vigouroux, Y., Billot, C., Barnaud, A., Leclerc, C., 2025. Independent domestication and cultivation histories of two West African indigenous fonio millet crops. Nat. Commun. 16, 4067.

Kok, P.D.F., Robbertse, P.J., van Wyk, A.E., 1989. Systematic study of Digitaria section Digitaria (Poaceae) in southern Africa. South Afr. J. Bot. 55, 141–153.

Li, L., Li, N., Song, S.F., Li, Y.X., Xia, X.J., Fu, X.Q., Chen, G.H., Deng, H.F., 2014. Cloning and characterization of the drought-resistance OsRCI2-5 gene in rice (Oryza sativa L.). Genet. Mol. Res. GMR 13, 4022–4035.

Liu, M., Zhang, S., Hu, J., Sun, W., Padilla, J., He, Y., Li, Y., Yin, Z., Liu, X., Wang, W., Shen, D., Li, D., Zhang, H., Zheng, X., Cui, Z., Wang, G.-L., Wang, P., Zhou, B., Zhang, Z., 2019. Phosphorylation-guarded light-harvesting complex II contributes to broad-spectrum blast resistance in rice. Proc. Natl. Acad. Sci. 116, 17572–17577.

Liu, X.-Q., Yu, C.-Y., Dong, J.-G., Hu, S.-W., Xu, A.-X., 2017. Acetolactate Synthase-Inhibiting Gametocide Amidosulfuron Causes Chloroplast Destruction, Tissue Autophagy, and Elevation of Ethylene Release in Rapeseed. Front. Plant Sci. 8.

Loubet, I., Meyer, L., Michel, S., Pernin, F., Carrère, S., Barrès, B., Le Corre, V., Délye, C., 2023. A high diversity of non-target site resistance mechanisms to acetolactate-synthase (ALS) inhibiting herbicides has evolved within and among field populations of common ragweed (*Ambrosia artemisiifolia* L.). BMC Plant Biol. 23, 510.

Minoji, K., Sakai, T., 2024. A chromosome-scale genome assembly of Timorese crabgrass (*Digitaria radicosa*): a useful genomic resource for the Poaceae. G3 GenesGenomesGenetics 14, jkae242.

Morsy, M.R., Almutairi, A.M., Gibbons, J., Yun, S.J., de Los Reyes, B.G., 2005. The OsLti6 genes encoding low-molecular-weight membrane proteins are differentially expressed in rice cultivars with contrasting sensitivity to low temperature. Gene 344, 171–180.

Nakazono, M., Tsuji, H., Li, Y., Saisho, D., Arimura, S., Tsutsumi, N., Hirai, A., 2000. Expression of a Gene Encoding Mitochondrial Aldehyde Dehydrogenase in Rice Increases under Submerged Conditions. Plant Physiol. 124, 587–598.

Portères, R., 1955. Les Céréales mineures du genre Digitaria en Afrique et en Europe.

R.d, W., 1980. Distribution records for Digitaria bicornis in eastern United States. Sida Contrib. Bot. 8.

Touafchia, S., Maurin, O., Boonsuk, B., Hodkinson, T.R., Chantaranothai, P., Rakotomalala, N., Randrianarimanana, F., Randriamampianina, J.A., Roy, S., MacKinnon, L., Rakotoarinivo, M., Besnard, G., Haevermans, T., Vorontsova, M.S., 2023. Evolutionary history, traits, and weediness in Digitaria (Poaceae: Panicoideae). Bot. J. Linn. Soc. 203, 1–19.

Turóczy, Z., Kis, P., Török, K., Cserháti, M., Lendvai, Á., Dudits, D., Horváth, G.V., 2011. Overproduction of a rice aldo–keto reductase increases oxidative and heat stress tolerance by malondialdehyde and methylglyoxal detoxification. Plant Mol. Biol. 75, 399–412.

Webster, R.D., 1987. Taxonomy of *Digitaria* Section Digitaria in North America (poaceae: Paniceae). SIDA Contrib. Bot. 12, 209–222.

Xu, H., Leng, Q., Sun, L., Su, W., Yang, R., Li, J., Xue, F., Wu, R., 2025. Transcriptome analysis and non-target-site resistance mechanism of multi-resistant Lolium multiflorum under herbicide stress. Curr. Plant Biol. 41, 100441.
